# Supplementary material for: New potential energy surface and rotational deexcitation cross-sections of CNNC by para-H2 (jp = 0)
Source: Royal Society of Chemistry journal article supplement (doi:10.1039/d3cp03354f), 2023-01-01
Supplement: d3cp03354f1.pdf [file d3cp03354f1.pdf]

| $\phi$ | $\theta'$ | $\theta$ | R (Å) | Energy (in cm <sup>-1</sup> ) | $\phi$ | $\theta'$ | $\theta$ | R (Å) | Energy (in cm <sup>-1</sup> ) | $\phi$ | $\theta'$ | $\theta$ | R (Å) | Energy (in cm <sup>-1</sup> ) | $\phi$ | $\theta'$ | $\theta$ | R (Å) | Energy (in cm <sup>-1</sup> ) |
|--------|-----------|----------|-------|-------------------------------|--------|-----------|----------|-------|-------------------------------|--------|-----------|----------|-------|-------------------------------|--------|-----------|----------|-------|-------------------------------|
| 0      | 0         | 0        | 2.5   | 783010.71                     | 30     | 0         | 0        | 2.5   | 783010.71                     | 60     | 0         | 0        | 2.5   | 783010.71                     | 90     | 0         | 0        | 2.5   | 783010.71                     |
| 0      | 0         | 0        | 2.6   | 444073.25                     | 30     | 0         | 0        | 2.6   | 444073.25                     | 60     | 0         | 0        | 2.6   | 444073.25                     | 90     | 0         | 0        | 2.6   | 444073.25                     |
| 0      | 0         | 0        | 2.7   | 272347.31                     | 30     | 0         | 0        | 2.7   | 272347.31                     | 60     | 0         | 0        | 2.7   | 272347.31                     | 90     | 0         | 0        | 2.7   | 272347.31                     |
| 0      | 0         | 0        | 2.8   | 182028.55                     | 30     | 0         | 0        | 2.8   | 182028.55                     | 60     | 0         | 0        | 2.8   | 182028.55                     | 90     | 0         | 0        | 2.8   | 182028.55                     |
| 0      | 0         | 0        | 2.9   | 134133.63                     | 30     | 0         | 0        | 2.9   | 134133.63                     | 60     | 0         | 0        | 2.9   | 134133.63                     | 90     | 0         | 0        | 2.9   | 134133.63                     |
| 0      | 0         | 0        | 3     | 88044.25                      | 30     | 0         | 0        | 3     | 88044.25                      | 60     | 0         | 0        | 3     | 88044.25                      | 90     | 0         | 0        | 3     | 88044.25                      |
| 0      | 0         | 0        | 3.1   | 63707.18                      | 30     | 0         | 0        | 3.1   | 63707.18                      | 60     | 0         | 0        | 3.1   | 63707.18                      | 90     | 0         | 0        | 3.1   | 63707.18                      |
| 0      | 0         | 0        | 3.2   | 47033.44                      | 30     | 0         | 0        | 3.2   | 47033.44                      | 60     | 0         | 0        | 3.2   | 47033.44                      | 90     | 0         | 0        | 3.2   | 47033.44                      |
| 0      | 0         | 0        | 3.3   | 35083.07                      | 30     | 0         | 0        | 3.3   | 35083.07                      | 60     | 0         | 0        | 3.3   | 35083.07                      | 90     | 0         | 0        | 3.3   | 35083.07                      |
| 0      | 0         | 0        | 3.4   | 26239.87                      | 30     | 0         | 0        | 3.4   | 26239.87                      | 60     | 0         | 0        | 3.4   | 26239.87                      | 90     | 0         | 0        | 3.4   | 26239.87                      |
| 0      | 0         | 0        | 3.5   | 19645.95                      | 30     | 0         | 0        | 3.5   | 19645.95                      | 60     | 0         | 0        | 3.5   | 19645.95                      | 90     | 0         | 0        | 3.5   | 19645.95                      |
| 0      | 0         | 0        | 3.6   | 14585.96                      | 30     | 0         | 0        | 3.6   | 14585.96                      | 60     | 0         | 0        | 3.6   | 14585.96                      | 90     | 0         | 0        | 3.6   | 14585.96                      |
| 0      | 0         | 0        | 3.7   | 10743.18                      | 30     | 0         | 0        | 3.7   | 10743.18                      | 60     | 0         | 0        | 3.7   | 10743.18                      | 90     | 0         | 0        | 3.7   | 10743.18                      |
| 0      | 0         | 0        | 3.8   | 7835.86                       | 30     | 0         | 0        | 3.8   | 7835.86                       | 60     | 0         | 0        | 3.8   | 7835.86                       | 90     | 0         | 0        | 3.8   | 7835.86                       |
| 0      | 0         | 0        | 3.9   | 5649.72                       | 30     | 0         | 0        | 3.9   | 5649.72                       | 60     | 0         | 0        | 3.9   | 5649.72                       | 90     | 0         | 0        | 3.9   | 5649.72                       |
| 0      | 0         | 0        | 4     | 4018.26                       | 30     | 0         | 0        | 4     | 4018.26                       | 60     | 0         | 0        | 4     | 4018.26                       | 90     | 0         | 0        | 4     | 4018.26                       |
| 0      | 0         | 0        | 4.1   | 2811.11                       | 30     | 0         | 0        | 4.1   | 2811.11                       | 60     | 0         | 0        | 4.1   | 2811.11                       | 90     | 0         | 0        | 4.1   | 2811.11                       |
| 0      | 0         | 0        | 4.2   | 1926.22                       | 30     | 0         | 0        | 4.2   | 1926.22                       | 60     | 0         | 0        | 4.2   | 1926.22                       | 90     | 0         | 0        | 4.2   | 1926.22                       |
| 0      | 0         | 0        | 4.3   | 1284.07                       | 30     | 0         | 0        | 4.3   | 1284.07                       | 60     | 0         | 0        | 4.3   | 1284.07                       | 90     | 0         | 0        | 4.3   | 1284.07                       |
| 0      | 0         | 0        | 4.4   | 823.29                        | 30     | 0         | 0        | 4.4   | 823.29                        | 60     | 0         | 0        | 4.4   | 823.29                        | 90     | 0         | 0        | 4.4   | 823.29                        |
| 0      | 0         | 0        | 4.5   | 496.96                        | 30     | 0         | 0        | 4.5   | 496.96                        | 60     | 0         | 0        | 4.5   | 496.96                        | 90     | 0         | 0        | 4.5   | 496.96                        |
| 0      | 0         | 0        | 4.6   | 269.49                        | 30     | 0         | 0        | 4.6   | 269.49                        | 60     | 0         | 0        | 4.6   | 269.49                        | 90     | 0         | 0        | 4.6   | 269.49                        |
| 0      | 0         | 0        | 4.7   | 114.05                        | 30     | 0         | 0        | 4.7   | 114.05                        | 60     | 0         | 0        | 4.7   | 114.05                        | 90     | 0         | 0        | 4.7   | 114.05                        |
| 0      | 0         | 0        | 4.8   | 10.62                         | 30     | 0         | 0        | 4.8   | 10.62                         | 60     | 0         | 0        | 4.8   | 10.62                         | 90     | 0         | 0        | 4.8   | 10.62                         |
| 0      | 0         | 0        | 4.9   | -55.70                        | 30     | 0         | 0        | 4.9   | -55.70                        | 60     | 0         | 0        | 4.9   | -55.70                        | 90     | 0         | 0        | 4.9   | -55.70                        |
| 0      | 0         | 0        | 5     | -95.96                        | 30     | 0         | 0        | 5     | -95.96                        | 60     | 0         | 0        | 5     | -95.96                        | 90     | 0         | 0        | 5     | -95.96                        |
| 0      | 0         | 0        | 5.1   | -118.24                       | 30     | 0         | 0        | 5.1   | -118.24                       | 60     | 0         | 0        | 5.1   | -118.24                       | 90     | 0         | 0        | 5.1   | -118.24                       |
| 0      | 0         | 0        | 5.2   | -128.35                       | 30     | 0         | 0        | 5.2   | -128.35                       | 60     | 0         | 0        | 5.2   | -128.35                       | 90     | 0         | 0        | 5.2   | -128.35                       |
| 0      | 0         | 0        | 5.3   | <b>-130.40</b>                | 30     | 0         | 0        | 5.3   | <b>-130.40</b>                | 60     | 0         | 0        | 5.3   | <b>-130.40</b>                | 90     | 0         | 0        | 5.3   | <b>-130.40</b>                |
| 0      | 0         | 0        | 5.4   | -127.27                       | 30     | 0         | 0        | 5.4   | -127.27                       | 60     | 0         | 0        | 5.4   | -127.27                       | 90     | 0         | 0        | 5.4   | -127.27                       |
| 0      | 0         | 0        | 5.5   | -121.01                       | 30     | 0         | 0        | 5.5   | -121.01                       | 60     | 0         | 0        | 5.5   | -121.01                       | 90     | 0         | 0        | 5.5   | -121.01                       |
| 0      | 0         | 0        | 5.6   | -113.01                       | 30     | 0         | 0        | 5.6   | -113.01                       | 60     | 0         | 0        | 5.6   | -113.01                       | 90     | 0         | 0        | 5.6   | -113.01                       |
| 0      | 0         | 0        | 5.7   | -104.22                       | 30     | 0         | 0        | 5.7   | -104.22                       | 60     | 0         | 0        | 5.7   | -104.22                       | 90     | 0         | 0        | 5.7   | -104.22                       |
| 0      | 0         | 0        | 5.8   | -95.29                        | 30     | 0         | 0        | 5.8   | -95.29                        | 60     | 0         | 0        | 5.8   | -95.29                        | 90     | 0         | 0        | 5.8   | -95.29                        |
| 0      | 0         | 0        | 5.9   | -86.59                        | 30     | 0         | 0        | 5.9   | -86.59                        | 60     | 0         | 0        | 5.9   | -86.59                        | 90     | 0         | 0        | 5.9   | -86.59                        |
| 0      | 0         | 0        | 6     | -78.36                        | 30     | 0         | 0        | 6     | -78.36                        | 60     | 0         | 0        | 6     | -78.36                        | 90     | 0         | 0        | 6     | -78.36                        |
| 0      | 0         | 0        | 6.5   | -46.54                        | 30     | 0         | 0        | 6.5   | -46.54                        | 60     | 0         | 0        | 6.5   | -46.54                        | 90     | 0         | 0        | 6.5   | -46.54                        |
| 0      | 0         | 0        | 7     | -28.05                        | 30     | 0         | 0        | 7     | -28.05                        | 60     | 0         | 0        | 7     | -28.05                        | 90     | 0         | 0        | 7     | -28.05                        |
| 0      | 0         | 0        | 7.5   | -17.60                        | 30     | 0         | 0        | 7.5   | -17.60                        | 60     | 0         | 0        | 7.5   | -17.60                        | 90     | 0         | 0        | 7.5   | -17.60                        |
| 0      | 0         | 0        | 8     | -11.52                        | 30     | 0         | 0        | 8     | -11.52                        | 60     | 0         | 0        | 8     | -11.52                        | 90     | 0         | 0        | 8     | -11.52                        |
| 0      | 0         | 0        | 8.5   | -7.83                         | 30     | 0         | 0        | 8.5   | -7.83                         | 60     | 0         | 0        | 8.5   | -7.83                         | 90     | 0         | 0        | 8.5   | -7.83                         |
| 0      | 0         | 0        | 9     | -5.49                         | 30     | 0         | 0        | 9     | -5.49                         | 60     | 0         | 0        | 9     | -5.49                         | 90     | 0         | 0        | 9     | -5.49                         |
| 0      | 0         | 0        | 9.5   | -3.94                         | 30     | 0         | 0        | 9.5   | -3.94                         | 60     | 0         | 0        | 9.5   | -3.94                         | 90     | 0         | 0        | 9.5   | -3.94                         |
| 0      | 0         | 0        | 10    | -2.89                         | 30     | 0         | 0        | 10    | -2.89                         | 60     | 0         | 0        | 10    | -2.89                         | 90     | 0         | 0        | 10    | -2.89                         |
| 0      | 0         | 0        | 12    | -0.97                         | 30     | 0         | 0        | 12    | -0.97                         | 60     | 0         | 0        | 12    | -0.97                         | 90     | 0         | 0        | 12    | -0.97                         |
| 0      | 0         | 0        | 15    | -0.24                         | 30     | 0         | 0        | 15    | -0.24                         | 60     | 0         | 0        | 15    | -0.24                         | 90     | 0         | 0        | 15    | -0.24                         |
| 0      | 0         | 0        | 20    | 0.00                          | 30     | 0         | 0        | 20    | 0.00                          | 60     | 0         | 0        | 20    | 0.00                          | 90     | 0         | 0        | 20    | 0.00                          |
| 0      | 0         | 10       | 2.5   | 316923.61                     | 30     | 0         | 10       | 2.5   | 317010.57                     | 60     | 0         | 10       | 2.5   | 317010.57                     | 90     | 0         | 10       | 2.5   | 316923.61                     |
| 0      | 0         | 10       | 2.6   | 220534.13                     | 30     | 0         | 10       | 2.6   | 220581.27                     | 60     | 0         | 10       | 2.6   | 220581.27                     | 90     | 0         | 10       | 2.6   | 220534.13                     |
| 0      | 0         | 10       | 2.7   | 160746.29                     | 30     | 0         | 10       | 2.7   | 160773.53                     | 60     | 0         | 10       | 2.7   | 160773.53                     | 90     | 0         | 10       | 2.7   | 160746.29                     |
| 0      | 0         | 10       | 2.8   | 108351.48                     | 30     | 0         | 10       | 2.8   | 108366.56                     | 60     | 0         | 10       | 2.8   | 108366.56                     | 90     | 0         | 10       | 2.8   | 108351.48                     |
| 0      | 0         | 10       | 2.9   | 78227.34                      | 30     | 0         | 10       | 2.9   | 78236.73                      | 60     | 0         | 10       | 2.9   | 78236.73                      | 90     | 0         | 10       | 2.9   | 78227.34                      |
| 0      | 0         | 10       | 3     | 58494.88                      | 30     | 0         | 10       | 3     | 58501.33                      | 60     | 0         | 10       | 3     | 58501.33                      | 90     | 0         | 10       | 3     | 58494.88                      |
| 0      | 0         | 10       | 3.1   | 44850.79                      | 30     | 0         | 10       | 3.1   | 44855.35                      | 60     | 0         | 10       | 3.1   | 44855.35                      | 90     | 0         | 10       | 3.1   | 44850.79                      |
| 0      | 0         | 10       | 3.2   | 34682.48                      | 30     | 0         | 10       | 3.2   | 34685.73                      | 60     | 0         | 10       | 3.2   | 34685.73                      | 90     | 0         | 10       | 3.2   | 34682.48                      |
| 0      | 0         | 10       | 3.3   | 26751.87                      | 30     | 0         | 10       | 3.3   | 26754.14                      | 60     | 0         | 10       | 3.3   | 26754.14                      | 90     | 0         | 10       | 3.3   | 26751.87                      |
| 0      | 0         | 10       | 3.4   | 20480.81                      | 30     | 0         | 10       | 3.4   | 20482.41                      | 60     | 0         | 10       | 3.4   | 20482.41                      | 90     | 0         | 10       | 3.4   | 20480.81                      |
| 0      | 0         | 10       | 3.5   | 15582.90                      | 30     | 0         | 10       | 3.5   | 15584.01                      | 60     | 0         | 10       | 3.5   | 15584.01                      | 90     | 0         | 10       | 3.5   | 15582.90                      |
| 0      | 0         | 10       | 3.6   | 11698.25                      | 30     | 0         | 10       | 3.6   | 11699.03                      | 60     | 0         | 10       | 3.6   | 11699.03                      | 90     | 0         | 10       | 3.6   | 11698.25                      |
| 0      | 0         | 10       | 3.7   | 8682.24                       | 30     | 0         | 10       | 3.7   | 8682.79                       | 60     | 0         | 10       | 3.7   | 8682.79                       | 90     | 0         | 10       | 3.7   | 8682.24                       |
| 0      | 0         | 10       | 3.8   | 6364.93                       | 30     | 0         | 10       | 3.8   | 6365.31                       | 60     | 0         | 10       | 3.8   | 6365.31                       | 90     | 0         | 10       | 3.8   | 6364.93                       |
| 0      | 0         | 10       | 3.9   | 4603.14                       | 30     | 0         | 10       | 3.9   | 4603.44                       | 60     | 0         | 10       | 3.9   | 4603.44                       | 90     | 0         | 10       | 3.9   | 4603.14                       |
| 0      | 0         | 10       | 4     | 3277.72                       | 30     | 0         | 10       | 4     | 3277.94                       | 60     | 0         | 10       | 4     | 3277.94                       | 90     | 0         | 10       | 4     | 3277.72                       |
| 0      | 0         | 10       | 4.1   | 2291.14                       | 30     | 0         | 10       | 4.1   | 2291.30                       | 60     | 0         | 10       | 4.1   | 2291.30                       | 90     | 0         | 10       | 4.1   | 2291.14                       |
| 0      | 0         | 10       | 4.2   | 1564.71                       | 30     | 0         | 10       | 4.2   | 1564.83                       | 60     | 0         | 10       | 4.2   | 1564.83                       | 90     | 0         | 10       | 4.2   | 1564.71                       |
| 0      | 0         | 10       | 4.3   | 1035.97                       | 30     | 0         | 10       | 4.3   | 1036.06                       | 60     | 0         | 10       | 4.3   | 1036.06                       | 90     | 0         | 10       | 4.3   | 1035.97                       |
| 0      | 0         | 10       | 4.4   | 656.01                        | 30     | 0         | 10       | 4.4   | 656.04                        | 60     | 0         | 10       | 4.4   | 656.04                        | 90     | 0         | 10       | 4.4   | 656.01                        |
| 0      | 0         | 10       | 4.5   | 386.86                        | 30     | 0         | 10       | 4.5   | 386.88                        | 60     | 0         | 10       | 4.5   | 386.88                        | 90     | 0         | 10       | 4.5   | 386.86                        |
| 0      | 0         | 10       | 4.6   | 199.53                        | 30     | 0         | 10       | 4.6   | 199.53                        | 60     | 0         | 10       | 4.6   | 199.53                        | 90     | 0         | 10       | 4.6   | 199.53                        |
| 0      | 0         | 10       | 4.7   | 71.96                         | 30     | 0         | 10       | 4.7   | 71.96                         | 60     | 0         | 10       | 4.7   | 71.96                         | 90     | 0         | 10       | 4.7   | 71.96                         |
| 0      | 0         | 10       | 4.8   | -12.43                        | 30     | 0         | 10       | 4.8   | -12.44                        | 60     | 0         | 10       | 4.8   | -12.44                        | 90     | 0         | 10       | 4.8   | -12.43                        |
| 0      | 0         | 10       | 4.9   | -66.07                        | 30     | 0         | 10       | 4.9   | -66.08                        | 60     | 0         | 10       | 4.9   | -66.08                        | 90     | 0         | 10       | 4.9   | -66.07                        |
| 0      | 0         | 10       | 5     | -98.12                        | 30     | 0         | 10       | 5     | -98.13                        | 60     | 0         | 10       | 5     | -98.13                        | 90     | 0         | 10       | 5     | -98.12                        |
| 0      | 0         | 10       | 5.1   | -115.26                       | 30     | 0         | 10       | 5.1   | -115.27                       | 60     | 0         | 10       | 5.1   | -115.27                       | 90     | 0         | 10       | 5.1   | -115.26                       |
| 0      | 0         | 10       | 5.2   | -122.28                       | 30     | 0         | 10       | 5.2   | -122.29                       | 60     | 0         | 10       | 5.2   | -122.29                       | 90     | 0         | 10       | 5.2   | -122.28                       |
| 0      | 0         | 10       | 5.3   | <b>-122.62</b>                | 30     | 0         | 10       | 5.3   | <b>-122.63</b>                | 60     | 0         | 10       | 5.3   | <b>-122.63</b> </             |        |           |          |       |                               |

|   |   |    |     |                |    |   |    |     |                |    |   |    |     |                |    |   |    |     |                |
|---|---|----|-----|----------------|----|---|----|-----|----------------|----|---|----|-----|----------------|----|---|----|-----|----------------|
| 0 | 0 | 20 | 2.5 | 89337.79       | 30 | 0 | 20 | 2.5 | 89323.18       | 60 | 0 | 20 | 2.5 | 89323.18       | 90 | 0 | 20 | 2.5 | 89337.79       |
| 0 | 0 | 20 | 2.6 | 72479.63       | 30 | 0 | 20 | 2.6 | 72469.11       | 60 | 0 | 20 | 2.6 | 72469.11       | 90 | 0 | 20 | 2.6 | 72479.63       |
| 0 | 0 | 20 | 2.7 | 57622.09       | 30 | 0 | 20 | 2.7 | 57614.89       | 60 | 0 | 20 | 2.7 | 57614.89       | 90 | 0 | 20 | 2.7 | 57622.09       |
| 0 | 0 | 20 | 2.8 | 45666.31       | 30 | 0 | 20 | 2.8 | 45661.32       | 60 | 0 | 20 | 2.8 | 45661.32       | 90 | 0 | 20 | 2.8 | 45666.31       |
| 0 | 0 | 20 | 2.9 | 36339.82       | 30 | 0 | 20 | 2.9 | 36336.27       | 60 | 0 | 20 | 2.9 | 36336.27       | 90 | 0 | 20 | 2.9 | 36339.82       |
| 0 | 0 | 20 | 3   | 29029.36       | 30 | 0 | 20 | 3   | 29026.74       | 60 | 0 | 20 | 3   | 29026.75       | 90 | 0 | 20 | 3   | 29029.36       |
| 0 | 0 | 20 | 3.1 | 23175.85       | 30 | 0 | 20 | 3.1 | 23173.87       | 60 | 0 | 20 | 3.1 | 23173.87       | 90 | 0 | 20 | 3.1 | 23175.85       |
| 0 | 0 | 20 | 3.2 | 18396.41       | 30 | 0 | 20 | 3.2 | 18394.90       | 60 | 0 | 20 | 3.2 | 18394.90       | 90 | 0 | 20 | 3.2 | 18396.41       |
| 0 | 0 | 20 | 3.3 | 14508.42       | 30 | 0 | 20 | 3.3 | 14507.25       | 60 | 0 | 20 | 3.3 | 14507.25       | 90 | 0 | 20 | 3.3 | 14508.42       |
| 0 | 0 | 20 | 3.4 | 11277.09       | 30 | 0 | 20 | 3.4 | 11276.22       | 60 | 0 | 20 | 3.4 | 11276.22       | 90 | 0 | 20 | 3.4 | 11277.09       |
| 0 | 0 | 20 | 3.5 | 8651.65        | 30 | 0 | 20 | 3.5 | 8651.01        | 60 | 0 | 20 | 3.5 | 8651.01        | 90 | 0 | 20 | 3.5 | 8651.66        |
| 0 | 0 | 20 | 3.6 | 6546.91        | 30 | 0 | 20 | 3.6 | 6546.44        | 60 | 0 | 20 | 3.6 | 6546.44        | 90 | 0 | 20 | 3.6 | 6546.91        |
| 0 | 0 | 20 | 3.7 | 4883.49        | 30 | 0 | 20 | 3.7 | 4883.19        | 60 | 0 | 20 | 3.7 | 4883.19        | 90 | 0 | 20 | 3.7 | 4883.49        |
| 0 | 0 | 20 | 3.8 | 3587.22        | 30 | 0 | 20 | 3.8 | 3587.02        | 60 | 0 | 20 | 3.8 | 3587.02        | 90 | 0 | 20 | 3.8 | 3587.22        |
| 0 | 0 | 20 | 3.9 | 2590.70        | 30 | 0 | 20 | 3.9 | 2590.53        | 60 | 0 | 20 | 3.9 | 2590.53        | 90 | 0 | 20 | 3.9 | 2590.70        |
| 0 | 0 | 20 | 4   | 1834.51        | 30 | 0 | 20 | 4   | 1834.39        | 60 | 0 | 20 | 4   | 1834.39        | 90 | 0 | 20 | 4   | 1834.51        |
| 0 | 0 | 20 | 4.1 | 1268.10        | 30 | 0 | 20 | 4.1 | 1268.01        | 60 | 0 | 20 | 4.1 | 1268.01        | 90 | 0 | 20 | 4.1 | 1268.10        |
| 0 | 0 | 20 | 4.2 | 849.41         | 30 | 0 | 20 | 4.2 | 849.36         | 60 | 0 | 20 | 4.2 | 849.36         | 90 | 0 | 20 | 4.2 | 849.41         |
| 0 | 0 | 20 | 4.3 | 544.25         | 30 | 0 | 20 | 4.3 | 544.21         | 60 | 0 | 20 | 4.3 | 544.21         | 90 | 0 | 20 | 4.3 | 544.25         |
| 0 | 0 | 20 | 4.4 | 325.26         | 30 | 0 | 20 | 4.4 | 325.24         | 60 | 0 | 20 | 4.4 | 325.24         | 90 | 0 | 20 | 4.4 | 325.27         |
| 0 | 0 | 20 | 4.5 | 170.90         | 30 | 0 | 20 | 4.5 | 170.89         | 60 | 0 | 20 | 4.5 | 170.89         | 90 | 0 | 20 | 4.5 | 170.90         |
| 0 | 0 | 20 | 4.6 | 64.43          | 30 | 0 | 20 | 4.6 | 64.42          | 60 | 0 | 20 | 4.6 | 64.42          | 90 | 0 | 20 | 4.6 | 64.43          |
| 0 | 0 | 20 | 4.7 | -6.99          | 30 | 0 | 20 | 4.7 | -7.00          | 60 | 0 | 20 | 4.7 | -7.00          | 90 | 0 | 20 | 4.7 | -6.99          |
| 0 | 0 | 20 | 4.8 | -53.09         | 30 | 0 | 20 | 4.8 | -53.09         | 60 | 0 | 20 | 4.8 | -53.09         | 90 | 0 | 20 | 4.8 | -53.09         |
| 0 | 0 | 20 | 4.9 | -81.14         | 30 | 0 | 20 | 4.9 | -81.14         | 60 | 0 | 20 | 4.9 | -81.14         | 90 | 0 | 20 | 4.9 | -81.14         |
| 0 | 0 | 20 | 5   | -96.52         | 30 | 0 | 20 | 5   | -96.52         | 60 | 0 | 20 | 5   | -96.52         | 90 | 0 | 20 | 5   | -96.52         |
| 0 | 0 | 20 | 5.1 | -103.21        | 30 | 0 | 20 | 5.1 | -103.21        | 60 | 0 | 20 | 5.1 | -103.21        | 90 | 0 | 20 | 5.1 | -103.21        |
| 0 | 0 | 20 | 5.2 | <b>-104.09</b> | 30 | 0 | 20 | 5.2 | <b>-104.09</b> | 60 | 0 | 20 | 5.2 | <b>-104.09</b> | 90 | 0 | 20 | 5.2 | <b>-104.09</b> |
| 0 | 0 | 20 | 5.3 | -101.27        | 30 | 0 | 20 | 5.3 | -101.27        | 60 | 0 | 20 | 5.3 | -101.27        | 90 | 0 | 20 | 5.3 | -101.27        |
| 0 | 0 | 20 | 5.4 | -96.20         | 30 | 0 | 20 | 5.4 | -96.20         | 60 | 0 | 20 | 5.4 | -96.20         | 90 | 0 | 20 | 5.4 | -96.20         |
| 0 | 0 | 20 | 5.5 | -89.89         | 30 | 0 | 20 | 5.5 | -89.89         | 60 | 0 | 20 | 5.5 | -89.89         | 90 | 0 | 20 | 5.5 | -89.89         |
| 0 | 0 | 20 | 5.6 | -83.04         | 30 | 0 | 20 | 5.6 | -83.04         | 60 | 0 | 20 | 5.6 | -83.04         | 90 | 0 | 20 | 5.6 | -83.04         |
| 0 | 0 | 20 | 5.7 | -76.08         | 30 | 0 | 20 | 5.7 | -76.08         | 60 | 0 | 20 | 5.7 | -76.08         | 90 | 0 | 20 | 5.7 | -76.08         |
| 0 | 0 | 20 | 5.8 | -69.30         | 30 | 0 | 20 | 5.8 | -69.30         | 60 | 0 | 20 | 5.8 | -69.30         | 90 | 0 | 20 | 5.8 | -69.30         |
| 0 | 0 | 20 | 5.9 | -62.87         | 30 | 0 | 20 | 5.9 | -62.87         | 60 | 0 | 20 | 5.9 | -62.87         | 90 | 0 | 20 | 5.9 | -62.87         |
| 0 | 0 | 20 | 6   | -56.88         | 30 | 0 | 20 | 6   | -56.89         | 60 | 0 | 20 | 6   | -56.89         | 90 | 0 | 20 | 6   | -56.88         |
| 0 | 0 | 20 | 6.5 | -34.13         | 30 | 0 | 20 | 6.5 | -34.13         | 60 | 0 | 20 | 6.5 | -34.13         | 90 | 0 | 20 | 6.5 | -34.13         |
| 0 | 0 | 20 | 7   | -20.92         | 30 | 0 | 20 | 7   | -20.92         | 60 | 0 | 20 | 7   | -20.92         | 90 | 0 | 20 | 7   | -20.92         |
| 0 | 0 | 20 | 7.5 | -13.34         | 30 | 0 | 20 | 7.5 | -13.34         | 60 | 0 | 20 | 7.5 | -13.34         | 90 | 0 | 20 | 7.5 | -13.34         |
| 0 | 0 | 20 | 8   | -8.86          | 30 | 0 | 20 | 8   | -8.86          | 60 | 0 | 20 | 8   | -8.86          | 90 | 0 | 20 | 8   | -8.86          |
| 0 | 0 | 20 | 8.5 | -6.09          | 30 | 0 | 20 | 8.5 | -6.09          | 60 | 0 | 20 | 8.5 | -6.09          | 90 | 0 | 20 | 8.5 | -6.09          |
| 0 | 0 | 20 | 9   | -4.31          | 30 | 0 | 20 | 9   | -4.31          | 60 | 0 | 20 | 9   | -4.31          | 90 | 0 | 20 | 9   | -4.31          |
| 0 | 0 | 20 | 9.5 | -3.12          | 30 | 0 | 20 | 9.5 | -3.12          | 60 | 0 | 20 | 9.5 | -3.12          | 90 | 0 | 20 | 9.5 | -3.12          |
| 0 | 0 | 20 | 10  | -2.30          | 30 | 0 | 20 | 10  | -2.30          | 60 | 0 | 20 | 10  | -2.30          | 90 | 0 | 20 | 10  | -2.30          |
| 0 | 0 | 20 | 12  | -0.79          | 30 | 0 | 20 | 12  | -0.79          | 60 | 0 | 20 | 12  | -0.79          | 90 | 0 | 20 | 12  | -0.79          |
| 0 | 0 | 20 | 15  | -0.20          | 30 | 0 | 20 | 15  | -0.20          | 60 | 0 | 20 | 15  | -0.20          | 90 | 0 | 20 | 15  | -0.20          |
| 0 | 0 | 20 | 20  | 0.00           | 30 | 0 | 20 | 20  | 0.00           | 60 | 0 | 20 | 20  | 0.00           | 90 | 0 | 20 | 20  | 0.00           |
| 0 | 0 | 30 | 2.5 | 33956.21       | 30 | 0 | 30 | 2.5 | 33957.05       | 60 | 0 | 30 | 2.5 | 33957.55       | 90 | 0 | 30 | 2.5 | 33956.21       |
| 0 | 0 | 30 | 2.6 | 28601.32       | 30 | 0 | 30 | 2.6 | 28602.00       | 60 | 0 | 30 | 2.6 | 28602.39       | 90 | 0 | 30 | 2.6 | 28601.32       |
| 0 | 0 | 30 | 2.7 | 23826.25       | 30 | 0 | 30 | 2.7 | 23826.79       | 60 | 0 | 30 | 2.7 | 23827.09       | 90 | 0 | 30 | 2.7 | 23826.25       |
| 0 | 0 | 30 | 2.8 | 19655.73       | 30 | 0 | 30 | 2.8 | 19656.16       | 60 | 0 | 30 | 2.8 | 19656.39       | 90 | 0 | 30 | 2.8 | 19655.73       |
| 0 | 0 | 30 | 2.9 | 16105.11       | 30 | 0 | 30 | 2.9 | 16105.43       | 60 | 0 | 30 | 2.9 | 16105.60       | 90 | 0 | 30 | 2.9 | 16105.11       |
| 0 | 0 | 30 | 3   | 13031.99       | 30 | 0 | 30 | 3   | 13032.26       | 60 | 0 | 30 | 3   | 13032.38       | 90 | 0 | 30 | 3   | 13031.99       |
| 0 | 0 | 30 | 3.1 | 10430.51       | 30 | 0 | 30 | 3.1 | 10430.71       | 60 | 0 | 30 | 3.1 | 10430.80       | 90 | 0 | 30 | 3.1 | 10430.51       |
| 0 | 0 | 30 | 3.2 | 8250.41        | 30 | 0 | 30 | 3.2 | 8250.57        | 60 | 0 | 30 | 3.2 | 8250.64        | 90 | 0 | 30 | 3.2 | 8250.41        |
| 0 | 0 | 30 | 3.3 | 6444.57        | 30 | 0 | 30 | 3.3 | 6444.69        | 60 | 0 | 30 | 3.3 | 6444.74        | 90 | 0 | 30 | 3.3 | 6444.57        |
| 0 | 0 | 30 | 3.4 | 4967.72        | 30 | 0 | 30 | 3.4 | 4967.85        | 60 | 0 | 30 | 3.4 | 4967.89        | 90 | 0 | 30 | 3.4 | 4967.72        |
| 0 | 0 | 30 | 3.5 | 3776.03        | 30 | 0 | 30 | 3.5 | 3776.10        | 60 | 0 | 30 | 3.5 | 3776.13        | 90 | 0 | 30 | 3.5 | 3776.03        |
| 0 | 0 | 30 | 3.6 | 2827.33        | 30 | 0 | 30 | 3.6 | 2827.38        | 60 | 0 | 30 | 3.6 | 2827.41        | 90 | 0 | 30 | 3.6 | 2827.33        |
| 0 | 0 | 30 | 3.7 | 2082.22        | 30 | 0 | 30 | 3.7 | 2082.26        | 60 | 0 | 30 | 3.7 | 2082.28        | 90 | 0 | 30 | 3.7 | 2082.22        |
| 0 | 0 | 30 | 3.8 | 1504.80        | 30 | 0 | 30 | 3.8 | 1504.83        | 60 | 0 | 30 | 3.8 | 1504.84        | 90 | 0 | 30 | 3.8 | 1504.80        |
| 0 | 0 | 30 | 3.9 | 1063.26        | 30 | 0 | 30 | 3.9 | 1063.28        | 60 | 0 | 30 | 3.9 | 1063.29        | 90 | 0 | 30 | 3.9 | 1063.26        |
| 0 | 0 | 30 | 4   | 730.16         | 30 | 0 | 30 | 4   | 730.17         | 60 | 0 | 30 | 4   | 730.18         | 90 | 0 | 30 | 4   | 730.16         |
| 0 | 0 | 30 | 4.1 | 482.38         | 30 | 0 | 30 | 4.1 | 482.39         | 60 | 0 | 30 | 4.1 | 482.40         | 90 | 0 | 30 | 4.1 | 482.38         |
| 0 | 0 | 30 | 4.2 | 300.83         | 30 | 0 | 30 | 4.2 | 300.84         | 60 | 0 | 30 | 4.2 | 300.84         | 90 | 0 | 30 | 4.2 | 300.83         |
| 0 | 0 | 30 | 4.3 | 170.06         | 30 | 0 | 30 | 4.3 | 170.06         | 60 | 0 | 30 | 4.3 | 170.07         | 90 | 0 | 30 | 4.3 | 170.06         |
| 0 | 0 | 30 | 4.4 | 77.75          | 30 | 0 | 30 | 4.4 | 77.75          | 60 | 0 | 30 | 4.4 | 77.76          | 90 | 0 | 30 | 4.4 | 77.75          |
| 0 | 0 | 30 | 4.5 | 14.22          | 30 | 0 | 30 | 4.5 | 14.22          | 60 | 0 | 30 | 4.5 | 14.22          | 90 | 0 | 30 | 4.5 | 14.22          |
| 0 | 0 | 30 | 4.6 | -28.06         | 30 | 0 | 30 | 4.6 | -28.06         | 60 | 0 | 30 | 4.6 | -28.06         | 90 | 0 | 30 | 4.6 | -28.06         |
| 0 | 0 | 30 | 4.7 | -54.86         | 30 | 0 | 30 | 4.7 | -54.87         | 60 | 0 | 30 | 4.7 | -54.86         | 90 | 0 | 30 | 4.7 | -54.86         |
| 0 | 0 | 30 | 4.8 | -70.60         | 30 | 0 | 30 | 4.8 | -70.60         | 60 | 0 | 30 | 4.8 | -70.60         | 90 | 0 | 30 | 4.8 | -70.60         |
| 0 | 0 | 30 | 4.9 | -78.59         | 30 | 0 | 30 | 4.9 | -78.60         | 60 | 0 | 30 | 4.9 | -78.60         | 90 | 0 | 30 | 4.9 | -78.59         |
| 0 | 0 | 30 | 5   | <b>-81.30</b>  | 30 | 0 | 30 | 5   | <b>-81.31</b>  | 60 | 0 | 30 | 5   | <b>-81.30</b>  | 90 | 0 | 30 | 5   | <b>-81.30</b>  |
| 0 | 0 | 30 | 5.1 | -80.52         | 30 | 0 | 30 | 5.1 | -80.52         | 60 | 0 | 30 | 5.1 | -80.52         | 90 | 0 | 30 | 5.1 | -80.52         |
| 0 | 0 | 30 | 5.2 | -77.51         | 30 | 0 | 30 | 5.2 | -77.52         | 60 | 0 | 30 | 5.2 | -77.52         | 90 | 0 | 30 | 5.2 | -77.51         |
| 0 | 0 | 30 | 5.3 | -73.19         | 30 | 0 | 30 | 5.3 | -73.19         | 60 | 0 | 30 | 5.3 | -73.19         | 90 | 0 | 30 | 5.3 | -73.19         |
| 0 | 0 | 30 | 5.4 | -68.16         | 30 | 0 | 30 | 5.4 | -68.16         | 60 | 0 | 30 | 5.4 | -68.16         | 90 | 0 | 30 | 5.4 | -68.16         |
| 0 | 0 | 30 | 5.5 | -62.85         | 30 | 0 | 30 | 5.5 |                |    |   |    |     |                |    |   |    |     |                |

|   |   |    |     |               |    |   |    |     |               |    |   |    |     |               |    |   |    |     |               |
|---|---|----|-----|---------------|----|---|----|-----|---------------|----|---|----|-----|---------------|----|---|----|-----|---------------|
| 0 | 0 | 40 | 2.6 | 13740.34      | 30 | 0 | 40 | 2.6 | 13740.51      | 60 | 0 | 40 | 2.6 | 13740.51      | 90 | 0 | 40 | 2.6 | 13740.34      |
| 0 | 0 | 40 | 2.7 | 11055.92      | 30 | 0 | 40 | 2.7 | 11056.06      | 60 | 0 | 40 | 2.7 | 11056.06      | 90 | 0 | 40 | 2.7 | 11055.92      |
| 0 | 0 | 40 | 2.8 | 8824.69       | 30 | 0 | 40 | 2.8 | 8824.81       | 60 | 0 | 40 | 2.8 | 8824.81       | 90 | 0 | 40 | 2.8 | 8824.69       |
| 0 | 0 | 40 | 2.9 | 6983.23       | 30 | 0 | 40 | 2.9 | 6983.35       | 60 | 0 | 40 | 2.9 | 6983.35       | 90 | 0 | 40 | 2.9 | 6983.23       |
| 0 | 0 | 40 | 3   | 5474.67       | 30 | 0 | 40 | 3   | 5474.78       | 60 | 0 | 40 | 3   | 5474.78       | 90 | 0 | 40 | 3   | 5474.67       |
| 0 | 0 | 40 | 3.1 | 4248.69       | 30 | 0 | 40 | 3.1 | 4248.75       | 60 | 0 | 40 | 3.1 | 4248.75       | 90 | 0 | 40 | 3.1 | 4248.69       |
| 0 | 0 | 40 | 3.2 | 3260.78       | 30 | 0 | 40 | 3.2 | 3260.83       | 60 | 0 | 40 | 3.2 | 3260.83       | 90 | 0 | 40 | 3.2 | 3260.78       |
| 0 | 0 | 40 | 3.3 | 2471.98       | 30 | 0 | 40 | 3.3 | 2472.01       | 60 | 0 | 40 | 3.3 | 2472.01       | 90 | 0 | 40 | 3.3 | 2471.98       |
| 0 | 0 | 40 | 3.4 | 1848.21       | 30 | 0 | 40 | 3.4 | 1848.23       | 60 | 0 | 40 | 3.4 | 1848.23       | 90 | 0 | 40 | 3.4 | 1848.21       |
| 0 | 0 | 40 | 3.5 | 1359.96       | 30 | 0 | 40 | 3.5 | 1359.98       | 60 | 0 | 40 | 3.5 | 1359.98       | 90 | 0 | 40 | 3.5 | 1359.96       |
| 0 | 0 | 40 | 3.6 | 981.91        | 30 | 0 | 40 | 3.6 | 981.92        | 60 | 0 | 40 | 3.6 | 981.92        | 90 | 0 | 40 | 3.6 | 981.91        |
| 0 | 0 | 40 | 3.7 | 692.55        | 30 | 0 | 40 | 3.7 | 692.56        | 60 | 0 | 40 | 3.7 | 692.56        | 90 | 0 | 40 | 3.7 | 692.55        |
| 0 | 0 | 40 | 3.8 | 473.83        | 30 | 0 | 40 | 3.8 | 473.83        | 60 | 0 | 40 | 3.8 | 473.83        | 90 | 0 | 40 | 3.8 | 473.83        |
| 0 | 0 | 40 | 3.9 | 310.75        | 30 | 0 | 40 | 3.9 | 310.75        | 60 | 0 | 40 | 3.9 | 310.75        | 90 | 0 | 40 | 3.9 | 310.75        |
| 0 | 0 | 40 | 4   | 190.98        | 30 | 0 | 40 | 4   | 190.98        | 60 | 0 | 40 | 4   | 190.98        | 90 | 0 | 40 | 4   | 190.98        |
| 0 | 0 | 40 | 4.1 | 104.51        | 30 | 0 | 40 | 4.1 | 104.51        | 60 | 0 | 40 | 4.1 | 104.51        | 90 | 0 | 40 | 4.1 | 104.51        |
| 0 | 0 | 40 | 4.2 | 43.33         | 30 | 0 | 40 | 4.2 | 43.32         | 60 | 0 | 40 | 4.2 | 43.32         | 90 | 0 | 40 | 4.2 | 43.33         |
| 0 | 0 | 40 | 4.3 | 1.14          | 30 | 0 | 40 | 4.3 | 1.13          | 60 | 0 | 40 | 4.3 | 1.13          | 90 | 0 | 40 | 4.3 | 1.14          |
| 0 | 0 | 40 | 4.4 | -26.95        | 30 | 0 | 40 | 4.4 | -26.96        | 60 | 0 | 40 | 4.4 | -26.96        | 90 | 0 | 40 | 4.4 | -26.95        |
| 0 | 0 | 40 | 4.5 | -44.71        | 30 | 0 | 40 | 4.5 | -44.72        | 60 | 0 | 40 | 4.5 | -44.72        | 90 | 0 | 40 | 4.5 | -44.71        |
| 0 | 0 | 40 | 4.6 | -55.04        | 30 | 0 | 40 | 4.6 | -55.05        | 60 | 0 | 40 | 4.6 | -55.05        | 90 | 0 | 40 | 4.6 | -55.04        |
| 0 | 0 | 40 | 4.7 | -60.12        | 30 | 0 | 40 | 4.7 | -60.13        | 60 | 0 | 40 | 4.7 | -60.13        | 90 | 0 | 40 | 4.7 | -60.12        |
| 0 | 0 | 40 | 4.8 | <b>-61.62</b> | 30 | 0 | 40 | 4.8 | <b>-61.60</b> | 60 | 0 | 40 | 4.8 | <b>-61.60</b> | 90 | 0 | 40 | 4.8 | <b>-61.60</b> |
| 0 | 0 | 40 | 4.9 | -60.67        | 30 | 0 | 40 | 4.9 | -60.68        | 60 | 0 | 40 | 4.9 | -60.68        | 90 | 0 | 40 | 4.9 | -60.67        |
| 0 | 0 | 40 | 5   | -58.21        | 30 | 0 | 40 | 5   | -58.22        | 60 | 0 | 40 | 5   | -58.22        | 90 | 0 | 40 | 5   | -58.21        |
| 0 | 0 | 40 | 5.1 | -54.84        | 30 | 0 | 40 | 5.1 | -54.84        | 60 | 0 | 40 | 5.1 | -54.84        | 90 | 0 | 40 | 5.1 | -54.84        |
| 0 | 0 | 40 | 5.2 | -50.99        | 30 | 0 | 40 | 5.2 | -50.99        | 60 | 0 | 40 | 5.2 | -50.99        | 90 | 0 | 40 | 5.2 | -50.99        |
| 0 | 0 | 40 | 5.3 | -46.96        | 30 | 0 | 40 | 5.3 | -46.97        | 60 | 0 | 40 | 5.3 | -46.97        | 90 | 0 | 40 | 5.3 | -46.96        |
| 0 | 0 | 40 | 5.4 | -42.97        | 30 | 0 | 40 | 5.4 | -42.96        | 60 | 0 | 40 | 5.4 | -42.96        | 90 | 0 | 40 | 5.4 | -42.97        |
| 0 | 0 | 40 | 5.5 | -39.11        | 30 | 0 | 40 | 5.5 | -39.11        | 60 | 0 | 40 | 5.5 | -39.11        | 90 | 0 | 40 | 5.5 | -39.11        |
| 0 | 0 | 40 | 5.6 | -35.48        | 30 | 0 | 40 | 5.6 | -35.48        | 60 | 0 | 40 | 5.6 | -35.48        | 90 | 0 | 40 | 5.6 | -35.48        |
| 0 | 0 | 40 | 5.7 | -32.11        | 30 | 0 | 40 | 5.7 | -32.11        | 60 | 0 | 40 | 5.7 | -32.11        | 90 | 0 | 40 | 5.7 | -32.11        |
| 0 | 0 | 40 | 5.8 | -29.02        | 30 | 0 | 40 | 5.8 | -29.02        | 60 | 0 | 40 | 5.8 | -29.02        | 90 | 0 | 40 | 5.8 | -29.02        |
| 0 | 0 | 40 | 5.9 | -26.21        | 30 | 0 | 40 | 5.9 | -26.21        | 60 | 0 | 40 | 5.9 | -26.21        | 90 | 0 | 40 | 5.9 | -26.21        |
| 0 | 0 | 40 | 6   | -23.67        | 30 | 0 | 40 | 6   | -23.67        | 60 | 0 | 40 | 6   | -23.67        | 90 | 0 | 40 | 6   | -23.67        |
| 0 | 0 | 40 | 6.5 | -14.37        | 30 | 0 | 40 | 6.5 | -14.37        | 60 | 0 | 40 | 6.5 | -14.37        | 90 | 0 | 40 | 6.5 | -14.37        |
| 0 | 0 | 40 | 7   | -9.04         | 30 | 0 | 40 | 7   | -9.04         | 60 | 0 | 40 | 7   | -9.04         | 90 | 0 | 40 | 7   | -9.04         |
| 0 | 0 | 40 | 7.5 | -5.92         | 30 | 0 | 40 | 7.5 | -5.92         | 60 | 0 | 40 | 7.5 | -5.92         | 90 | 0 | 40 | 7.5 | -5.92         |
| 0 | 0 | 40 | 8   | -4.02         | 30 | 0 | 40 | 8   | -4.02         | 60 | 0 | 40 | 8   | -4.02         | 90 | 0 | 40 | 8   | -4.02         |
| 0 | 0 | 40 | 8.5 | -2.81         | 30 | 0 | 40 | 8.5 | -2.81         | 60 | 0 | 40 | 8.5 | -2.81         | 90 | 0 | 40 | 8.5 | -2.81         |
| 0 | 0 | 40 | 9   | -2.01         | 30 | 0 | 40 | 9   | -2.01         | 60 | 0 | 40 | 9   | -2.01         | 90 | 0 | 40 | 9   | -2.01         |
| 0 | 0 | 40 | 9.5 | -1.47         | 30 | 0 | 40 | 9.5 | -1.47         | 60 | 0 | 40 | 9.5 | -1.47         | 90 | 0 | 40 | 9.5 | -1.47         |
| 0 | 0 | 40 | 10  | -1.10         | 30 | 0 | 40 | 10  | -1.10         | 60 | 0 | 40 | 10  | -1.10         | 90 | 0 | 40 | 10  | -1.10         |
| 0 | 0 | 40 | 12  | -0.38         | 30 | 0 | 40 | 12  | -0.38         | 60 | 0 | 40 | 12  | -0.38         | 90 | 0 | 40 | 12  | -0.38         |
| 0 | 0 | 40 | 15  | -0.09         | 30 | 0 | 40 | 15  | -0.09         | 60 | 0 | 40 | 15  | -0.09         | 90 | 0 | 40 | 15  | -0.09         |
| 0 | 0 | 40 | 20  | 0.00          | 30 | 0 | 40 | 20  | 0.00          | 60 | 0 | 40 | 20  | 0.00          | 90 | 0 | 40 | 20  | 0.00          |
| 0 | 0 | 50 | 2.5 | 8591.97       | 30 | 0 | 50 | 2.5 | 8592.33       | 60 | 0 | 50 | 2.5 | 8592.33       | 90 | 0 | 50 | 2.5 | 8591.97       |
| 0 | 0 | 50 | 2.6 | 6619.03       | 30 | 0 | 50 | 2.6 | 6619.33       | 60 | 0 | 50 | 2.6 | 6619.33       | 90 | 0 | 50 | 2.6 | 6619.03       |
| 0 | 0 | 50 | 2.7 | 5067.10       | 30 | 0 | 50 | 2.7 | 5067.37       | 60 | 0 | 50 | 2.7 | 5067.37       | 90 | 0 | 50 | 2.7 | 5067.10       |
| 0 | 0 | 50 | 2.8 | 3851.47       | 30 | 0 | 50 | 2.8 | 3851.69       | 60 | 0 | 50 | 2.8 | 3851.69       | 90 | 0 | 50 | 2.8 | 3851.47       |
| 0 | 0 | 50 | 2.9 | 2903.62       | 30 | 0 | 50 | 2.9 | 2903.77       | 60 | 0 | 50 | 2.9 | 2903.77       | 90 | 0 | 50 | 2.9 | 2903.62       |
| 0 | 0 | 50 | 3   | 2168.23       | 30 | 0 | 50 | 3   | 2168.35       | 60 | 0 | 50 | 3   | 2168.35       | 90 | 0 | 50 | 3   | 2168.23       |
| 0 | 0 | 50 | 3.1 | 1600.96       | 30 | 0 | 50 | 3.1 | 1601.05       | 60 | 0 | 50 | 3.1 | 1601.05       | 90 | 0 | 50 | 3.1 | 1600.96       |
| 0 | 0 | 50 | 3.2 | 1166.24       | 30 | 0 | 50 | 3.2 | 1166.31       | 60 | 0 | 50 | 3.2 | 1166.30       | 90 | 0 | 50 | 3.2 | 1166.24       |
| 0 | 0 | 50 | 3.3 | 835.52        | 30 | 0 | 50 | 3.3 | 835.57        | 60 | 0 | 50 | 3.3 | 835.57        | 90 | 0 | 50 | 3.3 | 835.52        |
| 0 | 0 | 50 | 3.4 | 585.96        | 30 | 0 | 50 | 3.4 | 586.00        | 60 | 0 | 50 | 3.4 | 586.00        | 90 | 0 | 50 | 3.4 | 585.96        |
| 0 | 0 | 50 | 3.5 | 399.39        | 30 | 0 | 50 | 3.5 | 399.42        | 60 | 0 | 50 | 3.5 | 399.42        | 90 | 0 | 50 | 3.5 | 399.39        |
| 0 | 0 | 50 | 3.6 | 261.42        | 30 | 0 | 50 | 3.6 | 261.44        | 60 | 0 | 50 | 3.6 | 261.44        | 90 | 0 | 50 | 3.6 | 261.42        |
| 0 | 0 | 50 | 3.7 | 160.75        | 30 | 0 | 50 | 3.7 | 160.76        | 60 | 0 | 50 | 3.7 | 160.76        | 90 | 0 | 50 | 3.7 | 160.75        |
| 0 | 0 | 50 | 3.8 | 88.48         | 30 | 0 | 50 | 3.8 | 88.49         | 60 | 0 | 50 | 3.8 | 88.49         | 90 | 0 | 50 | 3.8 | 88.48         |
| 0 | 0 | 50 | 3.9 | 37.67         | 30 | 0 | 50 | 3.9 | 37.67         | 60 | 0 | 50 | 3.9 | 37.67         | 90 | 0 | 50 | 3.9 | 37.67         |
| 0 | 0 | 50 | 4   | 2.83          | 30 | 0 | 50 | 4   | 2.83          | 60 | 0 | 50 | 4   | 2.84          | 90 | 0 | 50 | 4   | 2.83          |
| 0 | 0 | 50 | 4.1 | -20.26        | 30 | 0 | 50 | 4.1 | -20.26        | 60 | 0 | 50 | 4.1 | -20.26        | 90 | 0 | 50 | 4.1 | -20.26        |
| 0 | 0 | 50 | 4.2 | -34.82        | 30 | 0 | 50 | 4.2 | -34.83        | 60 | 0 | 50 | 4.2 | -34.83        | 90 | 0 | 50 | 4.2 | -34.82        |
| 0 | 0 | 50 | 4.3 | -43.29        | 30 | 0 | 50 | 4.3 | -43.30        | 60 | 0 | 50 | 4.3 | -43.30        | 90 | 0 | 50 | 4.3 | -43.29        |
| 0 | 0 | 50 | 4.4 | -47.46        | 30 | 0 | 50 | 4.4 | -47.47        | 60 | 0 | 50 | 4.4 | -47.47        | 90 | 0 | 50 | 4.4 | -47.46        |
| 0 | 0 | 50 | 4.5 | <b>-48.67</b> | 30 | 0 | 50 | 4.5 | <b>-48.67</b> | 60 | 0 | 50 | 4.5 | <b>-48.67</b> | 90 | 0 | 50 | 4.5 | <b>-48.66</b> |
| 0 | 0 | 50 | 4.6 | -47.89        | 30 | 0 | 50 | 4.6 | -47.89        | 60 | 0 | 50 | 4.6 | -47.89        | 90 | 0 | 50 | 4.6 | -47.89        |
| 0 | 0 | 50 | 4.7 | -45.85        | 30 | 0 | 50 | 4.7 | -45.86        | 60 | 0 | 50 | 4.7 | -45.86        | 90 | 0 | 50 | 4.7 | -45.85        |
| 0 | 0 | 50 | 4.8 | -43.07        | 30 | 0 | 50 | 4.8 | -43.08        | 60 | 0 | 50 | 4.8 | -43.08        | 90 | 0 | 50 | 4.8 | -43.07        |
| 0 | 0 | 50 | 4.9 | -39.91        | 30 | 0 | 50 | 4.9 | -39.92        | 60 | 0 | 50 | 4.9 | -39.92        | 90 | 0 | 50 | 4.9 | -39.91        |
| 0 | 0 | 50 | 5   | -36.61        | 30 | 0 | 50 | 5   | -36.61        | 60 | 0 | 50 | 5   | -36.61        | 90 | 0 | 50 | 5   | -36.61        |
| 0 | 0 | 50 | 5.1 | -33.34        | 30 | 0 | 50 | 5.1 | -33.34        | 60 | 0 | 50 | 5.1 | -33.34        | 90 | 0 | 50 | 5.1 | -33.34        |
| 0 | 0 | 50 | 5.2 | -30.19        | 30 | 0 | 50 | 5.2 | -30.19        | 60 | 0 | 50 | 5.2 | -30.19        | 90 | 0 | 50 | 5.2 | -30.19        |
| 0 | 0 | 50 | 5.3 | -27.23        | 30 | 0 | 50 | 5.3 | -27.23        | 60 | 0 | 50 | 5.3 | -27.23        | 90 | 0 | 50 | 5.3 | -27.23        |
| 0 | 0 | 50 | 5.4 | -24.50        | 30 | 0 | 50 | 5.4 | -24.50        | 60 | 0 | 50 | 5.4 | -24.50        | 90 | 0 | 50 | 5.4 | -24.50        |
| 0 | 0 | 50 | 5.5 | -22.01        | 30 | 0 | 50 | 5.5 | -22.01        | 60 | 0 | 50 | 5.5 | -22.01        | 90 | 0 | 50 | 5.5 | -22.01        |
| 0 | 0 | 50 | 5.6 | -19.75        | 30 | 0 | 50 | 5.6 | -19.75        | 60 | 0 | 50 | 5.6 | -19.75        | 90 | 0 | 50 | 5.6 | -19.75        |
| 0 | 0 | 50 | 5.7 | -17.71        | 30 | 0 | 50 | 5.7 | -17.71        | 60 | 0 | 50 |     |               |    |   |    |     |               |

|   |   |    |     |               |    |   |    |     |               |    |   |    |     |               |    |   |    |     |               |
|---|---|----|-----|---------------|----|---|----|-----|---------------|----|---|----|-----|---------------|----|---|----|-----|---------------|
| 0 | 0 | 60 | 2.7 | 2270.42       | 30 | 0 | 60 | 2.7 | 2270.53       | 60 | 0 | 60 | 2.7 | 2270.53       | 90 | 0 | 60 | 2.7 | 2270.42       |
| 0 | 0 | 60 | 2.8 | 1634.91       | 30 | 0 | 60 | 2.8 | 1635.02       | 60 | 0 | 60 | 2.8 | 1634.99       | 90 | 0 | 60 | 2.8 | 1634.91       |
| 0 | 0 | 60 | 2.9 | 1161.33       | 30 | 0 | 60 | 2.9 | 1161.43       | 60 | 0 | 60 | 2.9 | 1161.38       | 90 | 0 | 60 | 2.9 | 1161.33       |
| 0 | 0 | 60 | 3   | 810.95        | 30 | 0 | 60 | 3   | 811.04        | 60 | 0 | 60 | 3   | 810.97        | 90 | 0 | 60 | 3   | 810.95        |
| 0 | 0 | 60 | 3.1 | 553.82        | 30 | 0 | 60 | 3.1 | 553.90        | 60 | 0 | 60 | 3.1 | 553.82        | 90 | 0 | 60 | 3.1 | 553.82        |
| 0 | 0 | 60 | 3.2 | 366.87        | 30 | 0 | 60 | 3.2 | 366.93        | 60 | 0 | 60 | 3.2 | 366.85        | 90 | 0 | 60 | 3.2 | 366.87        |
| 0 | 0 | 60 | 3.3 | 232.41        | 30 | 0 | 60 | 3.3 | 232.47        | 60 | 0 | 60 | 3.3 | 232.38        | 90 | 0 | 60 | 3.3 | 232.41        |
| 0 | 0 | 60 | 3.4 | 136.99        | 30 | 0 | 60 | 3.4 | 137.04        | 60 | 0 | 60 | 3.4 | 136.95        | 90 | 0 | 60 | 3.4 | 136.99        |
| 0 | 0 | 60 | 3.5 | 70.40         | 30 | 0 | 60 | 3.5 | 70.44         | 60 | 0 | 60 | 3.5 | 70.35         | 90 | 0 | 60 | 3.5 | 70.40         |
| 0 | 0 | 60 | 3.6 | 24.97         | 30 | 0 | 60 | 3.6 | 25.00         | 60 | 0 | 60 | 3.6 | 24.91         | 90 | 0 | 60 | 3.6 | 24.97         |
| 0 | 0 | 60 | 3.7 | -5.09         | 30 | 0 | 60 | 3.7 | -5.06         | 60 | 0 | 60 | 3.7 | -5.15         | 90 | 0 | 60 | 3.7 | -5.09         |
| 0 | 0 | 60 | 3.8 | -24.12        | 30 | 0 | 60 | 3.8 | -24.09        | 60 | 0 | 60 | 3.8 | -24.18        | 90 | 0 | 60 | 3.8 | -24.12        |
| 0 | 0 | 60 | 3.9 | -35.41        | 30 | 0 | 60 | 3.9 | -35.36        | 60 | 0 | 60 | 3.9 | -35.45        | 90 | 0 | 60 | 3.9 | -35.38        |
| 0 | 0 | 60 | 4   | -41.20        | 30 | 0 | 60 | 4   | -41.26        | 60 | 0 | 60 | 4   | -41.35        | 90 | 0 | 60 | 4   | -41.28        |
| 0 | 0 | 60 | 4.1 | <b>-43.66</b> | 30 | 0 | 60 | 4.1 | <b>-43.54</b> | 60 | 0 | 60 | 4.1 | <b>-43.62</b> | 90 | 0 | 60 | 4.1 | <b>-43.56</b> |
| 0 | 0 | 60 | 4.2 | -43.43        | 30 | 0 | 60 | 4.2 | -43.41        | 60 | 0 | 60 | 4.2 | -43.50        | 90 | 0 | 60 | 4.2 | -43.43        |
| 0 | 0 | 60 | 4.3 | -41.77        | 30 | 0 | 60 | 4.3 | -41.75        | 60 | 0 | 60 | 4.3 | -41.84        | 90 | 0 | 60 | 4.3 | -41.77        |
| 0 | 0 | 60 | 4.4 | -39.20        | 30 | 0 | 60 | 4.4 | -39.18        | 60 | 0 | 60 | 4.4 | -39.27        | 90 | 0 | 60 | 4.4 | -39.20        |
| 0 | 0 | 60 | 4.5 | -36.14        | 30 | 0 | 60 | 4.5 | -36.13        | 60 | 0 | 60 | 4.5 | -36.21        | 90 | 0 | 60 | 4.5 | -36.14        |
| 0 | 0 | 60 | 4.6 | -32.89        | 30 | 0 | 60 | 4.6 | -32.88        | 60 | 0 | 60 | 4.6 | -32.97        | 90 | 0 | 60 | 4.6 | -32.89        |
| 0 | 0 | 60 | 4.7 | -29.65        | 30 | 0 | 60 | 4.7 | -29.64        | 60 | 0 | 60 | 4.7 | -29.73        | 90 | 0 | 60 | 4.7 | -29.65        |
| 0 | 0 | 60 | 4.8 | -26.54        | 30 | 0 | 60 | 4.8 | -26.53        | 60 | 0 | 60 | 4.8 | -26.61        | 90 | 0 | 60 | 4.8 | -26.54        |
| 0 | 0 | 60 | 4.9 | -23.63        | 30 | 0 | 60 | 4.9 | -23.62        | 60 | 0 | 60 | 4.9 | -23.70        | 90 | 0 | 60 | 4.9 | -23.63        |
| 0 | 0 | 60 | 5   | -20.95        | 30 | 0 | 60 | 5   | -20.94        | 60 | 0 | 60 | 5   | -21.03        | 90 | 0 | 60 | 5   | -20.95        |
| 0 | 0 | 60 | 5.1 | -18.53        | 30 | 0 | 60 | 5.1 | -18.52        | 60 | 0 | 60 | 5.1 | -18.60        | 90 | 0 | 60 | 5.1 | -18.53        |
| 0 | 0 | 60 | 5.2 | -16.35        | 30 | 0 | 60 | 5.2 | -16.34        | 60 | 0 | 60 | 5.2 | -16.42        | 90 | 0 | 60 | 5.2 | -16.35        |
| 0 | 0 | 60 | 5.3 | -14.40        | 30 | 0 | 60 | 5.3 | -14.40        | 60 | 0 | 60 | 5.3 | -14.48        | 90 | 0 | 60 | 5.3 | -14.40        |
| 0 | 0 | 60 | 5.4 | -12.68        | 30 | 0 | 60 | 5.4 | -12.68        | 60 | 0 | 60 | 5.4 | -12.76        | 90 | 0 | 60 | 5.4 | -12.68        |
| 0 | 0 | 60 | 5.5 | -11.16        | 30 | 0 | 60 | 5.5 | -11.16        | 60 | 0 | 60 | 5.5 | -11.24        | 90 | 0 | 60 | 5.5 | -11.16        |
| 0 | 0 | 60 | 5.6 | -9.83         | 30 | 0 | 60 | 5.6 | -9.83         | 60 | 0 | 60 | 5.6 | -9.91         | 90 | 0 | 60 | 5.6 | -9.83         |
| 0 | 0 | 60 | 5.7 | -8.66         | 30 | 0 | 60 | 5.7 | -8.66         | 60 | 0 | 60 | 5.7 | -8.74         | 90 | 0 | 60 | 5.7 | -8.66         |
| 0 | 0 | 60 | 5.8 | -7.64         | 30 | 0 | 60 | 5.8 | -7.63         | 60 | 0 | 60 | 5.8 | -7.71         | 90 | 0 | 60 | 5.8 | -7.64         |
| 0 | 0 | 60 | 5.9 | -6.74         | 30 | 0 | 60 | 5.9 | -6.74         | 60 | 0 | 60 | 5.9 | -6.81         | 90 | 0 | 60 | 5.9 | -6.74         |
| 0 | 0 | 60 | 6   | -5.95         | 30 | 0 | 60 | 6   | -5.95         | 60 | 0 | 60 | 6   | -6.03         | 90 | 0 | 60 | 6   | -5.95         |
| 0 | 0 | 60 | 6.5 | -3.27         | 30 | 0 | 60 | 6.5 | -3.27         | 60 | 0 | 60 | 6.5 | -3.35         | 90 | 0 | 60 | 6.5 | -3.27         |
| 0 | 0 | 60 | 7   | -1.87         | 30 | 0 | 60 | 7   | -1.87         | 60 | 0 | 60 | 7   | -1.95         | 90 | 0 | 60 | 7   | -1.87         |
| 0 | 0 | 60 | 7.5 | -1.11         | 30 | 0 | 60 | 7.5 | -1.11         | 60 | 0 | 60 | 7.5 | -1.19         | 90 | 0 | 60 | 7.5 | -1.11         |
| 0 | 0 | 60 | 8   | -0.68         | 30 | 0 | 60 | 8   | -0.68         | 60 | 0 | 60 | 8   | -0.76         | 90 | 0 | 60 | 8   | -0.68         |
| 0 | 0 | 60 | 8.5 | -0.43         | 30 | 0 | 60 | 8.5 | -0.43         | 60 | 0 | 60 | 8.5 | -0.50         | 90 | 0 | 60 | 8.5 | -0.43         |
| 0 | 0 | 60 | 9   | -0.27         | 30 | 0 | 60 | 9   | -0.27         | 60 | 0 | 60 | 9   | -0.35         | 90 | 0 | 60 | 9   | -0.27         |
| 0 | 0 | 60 | 9.5 | -0.18         | 30 | 0 | 60 | 9.5 | -0.18         | 60 | 0 | 60 | 9.5 | -0.25         | 90 | 0 | 60 | 9.5 | -0.18         |
| 0 | 0 | 60 | 10  | -0.11         | 30 | 0 | 60 | 10  | -0.11         | 60 | 0 | 60 | 10  | -0.19         | 90 | 0 | 60 | 10  | -0.11         |
| 0 | 0 | 60 | 12  | -0.02         | 30 | 0 | 60 | 12  | -0.02         | 60 | 0 | 60 | 12  | -0.10         | 90 | 0 | 60 | 12  | -0.02         |
| 0 | 0 | 60 | 15  | 0.00          | 30 | 0 | 60 | 15  | 0.00          | 60 | 0 | 60 | 15  | -0.07         | 90 | 0 | 60 | 15  | 0.00          |
| 0 | 0 | 60 | 20  | 0.00          | 30 | 0 | 60 | 20  | 0.00          | 60 | 0 | 60 | 20  | 0.00          | 90 | 0 | 60 | 20  | 0.00          |
| 0 | 0 | 70 | 2.5 | 2132.36       | 30 | 0 | 70 | 2.5 | 2132.37       | 60 | 0 | 70 | 2.5 | 2132.38       | 90 | 0 | 70 | 2.5 | 2132.36       |
| 0 | 0 | 70 | 2.6 | 1485.73       | 30 | 0 | 70 | 2.6 | 1485.75       | 60 | 0 | 70 | 2.6 | 1485.75       | 90 | 0 | 70 | 2.6 | 1485.73       |
| 0 | 0 | 70 | 2.7 | 1016.41       | 30 | 0 | 70 | 2.7 | 1016.43       | 60 | 0 | 70 | 2.7 | 1016.42       | 90 | 0 | 70 | 2.7 | 1016.41       |
| 0 | 0 | 70 | 2.8 | 679.09        | 30 | 0 | 70 | 2.8 | 679.10        | 60 | 0 | 70 | 2.8 | 679.10        | 90 | 0 | 70 | 2.8 | 679.09        |
| 0 | 0 | 70 | 2.9 | 439.24        | 30 | 0 | 70 | 2.9 | 439.25        | 60 | 0 | 70 | 2.9 | 439.25        | 90 | 0 | 70 | 2.9 | 439.24        |
| 0 | 0 | 70 | 3   | 270.83        | 30 | 0 | 70 | 3   | 270.84        | 60 | 0 | 70 | 3   | 270.84        | 90 | 0 | 70 | 3   | 270.83        |
| 0 | 0 | 70 | 3.1 | 154.38        | 30 | 0 | 70 | 3.1 | 154.40        | 60 | 0 | 70 | 3.1 | 154.40        | 90 | 0 | 70 | 3.1 | 154.38        |
| 0 | 0 | 70 | 3.2 | 75.46         | 30 | 0 | 70 | 3.2 | 75.49         | 60 | 0 | 70 | 3.2 | 75.49         | 90 | 0 | 70 | 3.2 | 75.47         |
| 0 | 0 | 70 | 3.3 | 23.37         | 30 | 0 | 70 | 3.3 | 23.39         | 60 | 0 | 70 | 3.3 | 23.39         | 90 | 0 | 70 | 3.3 | 23.37         |
| 0 | 0 | 70 | 3.4 | -9.77         | 30 | 0 | 70 | 3.4 | -9.75         | 60 | 0 | 70 | 3.4 | -9.75         | 90 | 0 | 70 | 3.4 | -9.77         |
| 0 | 0 | 70 | 3.5 | -29.73        | 30 | 0 | 70 | 3.5 | -29.71        | 60 | 0 | 70 | 3.5 | -29.71        | 90 | 0 | 70 | 3.5 | -29.73        |
| 0 | 0 | 70 | 3.6 | -40.68        | 30 | 0 | 70 | 3.6 | -40.67        | 60 | 0 | 70 | 3.6 | -40.67        | 90 | 0 | 70 | 3.6 | -40.68        |
| 0 | 0 | 70 | 3.7 | -45.63        | 30 | 0 | 70 | 3.7 | -45.62        | 60 | 0 | 70 | 3.7 | -45.62        | 90 | 0 | 70 | 3.7 | -45.63        |
| 0 | 0 | 70 | 3.8 | <b>-46.66</b> | 30 | 0 | 70 | 3.8 | <b>-46.67</b> | 60 | 0 | 70 | 3.8 | <b>-46.67</b> | 90 | 0 | 70 | 3.8 | <b>-46.68</b> |
| 0 | 0 | 70 | 3.9 | -45.30        | 30 | 0 | 70 | 3.9 | -45.30        | 60 | 0 | 70 | 3.9 | -45.30        | 90 | 0 | 70 | 3.9 | -45.30        |
| 0 | 0 | 70 | 4   | -42.49        | 30 | 0 | 70 | 4   | -42.49        | 60 | 0 | 70 | 4   | -42.49        | 90 | 0 | 70 | 4   | -42.49        |
| 0 | 0 | 70 | 4.1 | -38.92        | 30 | 0 | 70 | 4.1 | -38.92        | 60 | 0 | 70 | 4.1 | -38.92        | 90 | 0 | 70 | 4.1 | -38.92        |
| 0 | 0 | 70 | 4.2 | -35.04        | 30 | 0 | 70 | 4.2 | -35.03        | 60 | 0 | 70 | 4.2 | -35.03        | 90 | 0 | 70 | 4.2 | -35.04        |
| 0 | 0 | 70 | 4.3 | -31.13        | 30 | 0 | 70 | 4.3 | -31.12        | 60 | 0 | 70 | 4.3 | -31.12        | 90 | 0 | 70 | 4.3 | -31.13        |
| 0 | 0 | 70 | 4.4 | -27.37        | 30 | 0 | 70 | 4.4 | -27.37        | 60 | 0 | 70 | 4.4 | -27.37        | 90 | 0 | 70 | 4.4 | -27.37        |
| 0 | 0 | 70 | 4.5 | -23.88        | 30 | 0 | 70 | 4.5 | -23.87        | 60 | 0 | 70 | 4.5 | -23.87        | 90 | 0 | 70 | 4.5 | -23.88        |
| 0 | 0 | 70 | 4.6 | -20.69        | 30 | 0 | 70 | 4.6 | -20.69        | 60 | 0 | 70 | 4.6 | -20.69        | 90 | 0 | 70 | 4.6 | -20.69        |
| 0 | 0 | 70 | 4.7 | -17.84        | 30 | 0 | 70 | 4.7 | -17.84        | 60 | 0 | 70 | 4.7 | -17.84        | 90 | 0 | 70 | 4.7 | -17.84        |
| 0 | 0 | 70 | 4.8 | -15.31        | 30 | 0 | 70 | 4.8 | -15.31        | 60 | 0 | 70 | 4.8 | -15.31        | 90 | 0 | 70 | 4.8 | -15.31        |
| 0 | 0 | 70 | 4.9 | -13.10        | 30 | 0 | 70 | 4.9 | -13.09        | 60 | 0 | 70 | 4.9 | -13.09        | 90 | 0 | 70 | 4.9 | -13.10        |
| 0 | 0 | 70 | 5   | -11.16        | 30 | 0 | 70 | 5   | -11.16        | 60 | 0 | 70 | 5   | -11.16        | 90 | 0 | 70 | 5   | -11.16        |
| 0 | 0 | 70 | 5.1 | -9.49         | 30 | 0 | 70 | 5.1 | -9.49         | 60 | 0 | 70 | 5.1 | -9.49         | 90 | 0 | 70 | 5.1 | -9.49         |
| 0 | 0 | 70 | 5.2 | -8.05         | 30 | 0 | 70 | 5.2 | -8.04         | 60 | 0 | 70 | 5.2 | -8.04         | 90 | 0 | 70 | 5.2 | -8.05         |
| 0 | 0 | 70 | 5.3 | -6.80         | 30 | 0 | 70 | 5.3 | -6.80         | 60 | 0 | 70 | 5.3 | -6.80         | 90 | 0 | 70 | 5.3 | -6.80         |
| 0 | 0 | 70 | 5.4 | -5.74         | 30 | 0 | 70 | 5.4 | -5.73         | 60 | 0 | 70 | 5.4 | -5.73         | 90 | 0 | 70 | 5.4 | -5.74         |
| 0 | 0 | 70 | 5.5 | -4.83         | 30 | 0 | 70 | 5.5 | -4.82         | 60 | 0 | 70 | 5.5 | -4.82         | 90 | 0 | 70 | 5.5 | -4.83         |
| 0 | 0 | 70 | 5.6 | -4.05         | 30 | 0 | 70 | 5.6 | -4.05         | 60 | 0 | 70 | 5.6 | -4.05         | 90 | 0 | 70 | 5.6 | -4.05         |
| 0 | 0 | 70 | 5.7 | -3.39         | 30 | 0 | 70 | 5.7 | -3.38         | 60 | 0 | 70 | 5.7 | -3.38         | 90 | 0 | 70 | 5.7 | -3.39         |
| 0 | 0 | 70 | 5.8 | -2.82         | 30 | 0 | 70 | 5.8 | -2.82         | 60 | 0 | 70 | 5.8 | -2.82         | 90 | 0 | 70 | 5.8 | -2.82         |
| 0 | 0 | 70 | 5.9 | -2.34         | 30 | 0 | 70 | 5.9 | -2.34         | 60 | 0 | 70 | 5.9 | -2            |    |   |    |     |               |

|   |   |    |     |               |    |   |    |     |               |    |   |    |     |               |    |   |    |     |               |
|---|---|----|-----|---------------|----|---|----|-----|---------------|----|---|----|-----|---------------|----|---|----|-----|---------------|
| 0 | 0 | 80 | 2.8 | 290.86        | 30 | 0 | 80 | 2.8 | 290.81        | 60 | 0 | 80 | 2.8 | 290.81        | 90 | 0 | 80 | 2.8 | 290.86        |
| 0 | 0 | 80 | 2.9 | 155.23        | 30 | 0 | 80 | 2.9 | 155.18        | 60 | 0 | 80 | 2.9 | 155.18        | 90 | 0 | 80 | 2.9 | 155.23        |
| 0 | 0 | 80 | 3   | 66.08         | 30 | 0 | 80 | 3   | 66.04         | 60 | 0 | 80 | 3   | 66.04         | 90 | 0 | 80 | 3   | 66.08         |
| 0 | 0 | 80 | 3.1 | 9.39          | 30 | 0 | 80 | 3.1 | 9.36          | 60 | 0 | 80 | 3.1 | 9.36          | 90 | 0 | 80 | 3.1 | 9.39          |
| 0 | 0 | 80 | 3.2 | -24.95        | 30 | 0 | 80 | 3.2 | -24.98        | 60 | 0 | 80 | 3.2 | -24.98        | 90 | 0 | 80 | 3.2 | -24.95        |
| 0 | 0 | 80 | 3.3 | -44.18        | 30 | 0 | 80 | 3.3 | -44.21        | 60 | 0 | 80 | 3.3 | -44.21        | 90 | 0 | 80 | 3.3 | -44.18        |
| 0 | 0 | 80 | 3.4 | -53.40        | 30 | 0 | 80 | 3.4 | -53.42        | 60 | 0 | 80 | 3.4 | -53.42        | 90 | 0 | 80 | 3.4 | -53.40        |
| 0 | 0 | 80 | 3.5 | <b>-56.18</b> | 30 | 0 | 80 | 3.5 | <b>-56.20</b> | 60 | 0 | 80 | 3.5 | <b>-56.20</b> | 90 | 0 | 80 | 3.5 | <b>-56.18</b> |
| 0 | 0 | 80 | 3.6 | -55.00        | 30 | 0 | 80 | 3.6 | -55.01        | 60 | 0 | 80 | 3.6 | -55.01        | 90 | 0 | 80 | 3.6 | -55.00        |
| 0 | 0 | 80 | 3.7 | -51.51        | 30 | 0 | 80 | 3.7 | -51.53        | 60 | 0 | 80 | 3.7 | -51.53        | 90 | 0 | 80 | 3.7 | -51.51        |
| 0 | 0 | 80 | 3.8 | -46.84        | 30 | 0 | 80 | 3.8 | -46.86        | 60 | 0 | 80 | 3.8 | -46.86        | 90 | 0 | 80 | 3.8 | -46.84        |
| 0 | 0 | 80 | 3.9 | -41.70        | 30 | 0 | 80 | 3.9 | -41.71        | 60 | 0 | 80 | 3.9 | -41.71        | 90 | 0 | 80 | 3.9 | -41.70        |
| 0 | 0 | 80 | 4   | -36.54        | 30 | 0 | 80 | 4   | -36.55        | 60 | 0 | 80 | 4   | -36.55        | 90 | 0 | 80 | 4   | -36.54        |
| 0 | 0 | 80 | 4.1 | -31.61        | 30 | 0 | 80 | 4.1 | -31.62        | 60 | 0 | 80 | 4.1 | -31.62        | 90 | 0 | 80 | 4.1 | -31.61        |
| 0 | 0 | 80 | 4.2 | -27.06        | 30 | 0 | 80 | 4.2 | -27.07        | 60 | 0 | 80 | 4.2 | -27.07        | 90 | 0 | 80 | 4.2 | -27.06        |
| 0 | 0 | 80 | 4.3 | -22.97        | 30 | 0 | 80 | 4.3 | -22.97        | 60 | 0 | 80 | 4.3 | -22.97        | 90 | 0 | 80 | 4.3 | -22.97        |
| 0 | 0 | 80 | 4.4 | -19.34        | 30 | 0 | 80 | 4.4 | -19.34        | 60 | 0 | 80 | 4.4 | -19.34        | 90 | 0 | 80 | 4.4 | -19.34        |
| 0 | 0 | 80 | 4.5 | -16.16        | 30 | 0 | 80 | 4.5 | -16.17        | 60 | 0 | 80 | 4.5 | -16.17        | 90 | 0 | 80 | 4.5 | -16.16        |
| 0 | 0 | 80 | 4.6 | -13.41        | 30 | 0 | 80 | 4.6 | -13.42        | 60 | 0 | 80 | 4.6 | -13.42        | 90 | 0 | 80 | 4.6 | -13.41        |
| 0 | 0 | 80 | 4.7 | -11.05        | 30 | 0 | 80 | 4.7 | -11.06        | 60 | 0 | 80 | 4.7 | -11.06        | 90 | 0 | 80 | 4.7 | -11.05        |
| 0 | 0 | 80 | 4.8 | -9.04         | 30 | 0 | 80 | 4.8 | -9.05         | 60 | 0 | 80 | 4.8 | -9.05         | 90 | 0 | 80 | 4.8 | -9.04         |
| 0 | 0 | 80 | 4.9 | -7.34         | 30 | 0 | 80 | 4.9 | -7.35         | 60 | 0 | 80 | 4.9 | -7.35         | 90 | 0 | 80 | 4.9 | -7.34         |
| 0 | 0 | 80 | 5   | -5.90         | 30 | 0 | 80 | 5   | -5.91         | 60 | 0 | 80 | 5   | -5.91         | 90 | 0 | 80 | 5   | -5.90         |
| 0 | 0 | 80 | 5.1 | -4.69         | 30 | 0 | 80 | 5.1 | -4.70         | 60 | 0 | 80 | 5.1 | -4.70         | 90 | 0 | 80 | 5.1 | -4.69         |
| 0 | 0 | 80 | 5.2 | -3.68         | 30 | 0 | 80 | 5.2 | -3.68         | 60 | 0 | 80 | 5.2 | -3.68         | 90 | 0 | 80 | 5.2 | -3.68         |
| 0 | 0 | 80 | 5.3 | -2.83         | 30 | 0 | 80 | 5.3 | -2.84         | 60 | 0 | 80 | 5.3 | -2.84         | 90 | 0 | 80 | 5.3 | -2.83         |
| 0 | 0 | 80 | 5.4 | -2.13         | 30 | 0 | 80 | 5.4 | -2.13         | 60 | 0 | 80 | 5.4 | -2.13         | 90 | 0 | 80 | 5.4 | -2.13         |
| 0 | 0 | 80 | 5.5 | -1.54         | 30 | 0 | 80 | 5.5 | -1.55         | 60 | 0 | 80 | 5.5 | -1.55         | 90 | 0 | 80 | 5.5 | -1.54         |
| 0 | 0 | 80 | 5.6 | -1.06         | 30 | 0 | 80 | 5.6 | -1.06         | 60 | 0 | 80 | 5.6 | -1.06         | 90 | 0 | 80 | 5.6 | -1.06         |
| 0 | 0 | 80 | 5.7 | -0.66         | 30 | 0 | 80 | 5.7 | -0.66         | 60 | 0 | 80 | 5.7 | -0.66         | 90 | 0 | 80 | 5.7 | -0.66         |
| 0 | 0 | 80 | 5.8 | -0.33         | 30 | 0 | 80 | 5.8 | -0.33         | 60 | 0 | 80 | 5.8 | -0.33         | 90 | 0 | 80 | 5.8 | -0.33         |
| 0 | 0 | 80 | 5.9 | -0.06         | 30 | 0 | 80 | 5.9 | -0.06         | 60 | 0 | 80 | 5.9 | -0.06         | 90 | 0 | 80 | 5.9 | -0.06         |
| 0 | 0 | 80 | 6   | 0.16          | 30 | 0 | 80 | 6   | 0.16          | 60 | 0 | 80 | 6   | 0.16          | 90 | 0 | 80 | 6   | 0.16          |
| 0 | 0 | 80 | 6.5 | 0.75          | 30 | 0 | 80 | 6.5 | 0.75          | 60 | 0 | 80 | 6.5 | 0.75          | 90 | 0 | 80 | 6.5 | 0.75          |
| 0 | 0 | 80 | 7   | 0.89          | 30 | 0 | 80 | 7   | 0.89          | 60 | 0 | 80 | 7   | 0.89          | 90 | 0 | 80 | 7   | 0.89          |
| 0 | 0 | 80 | 7.5 | 0.85          | 30 | 0 | 80 | 7.5 | 0.85          | 60 | 0 | 80 | 7.5 | 0.85          | 90 | 0 | 80 | 7.5 | 0.85          |
| 0 | 0 | 80 | 8   | 0.75          | 30 | 0 | 80 | 8   | 0.75          | 60 | 0 | 80 | 8   | 0.75          | 90 | 0 | 80 | 8   | 0.75          |
| 0 | 0 | 80 | 8.5 | 0.64          | 30 | 0 | 80 | 8.5 | 0.64          | 60 | 0 | 80 | 8.5 | 0.64          | 90 | 0 | 80 | 8.5 | 0.64          |
| 0 | 0 | 80 | 9   | 0.53          | 30 | 0 | 80 | 9   | 0.54          | 60 | 0 | 80 | 9   | 0.54          | 90 | 0 | 80 | 9   | 0.53          |
| 0 | 0 | 80 | 9.5 | 0.44          | 30 | 0 | 80 | 9.5 | 0.44          | 60 | 0 | 80 | 9.5 | 0.44          | 90 | 0 | 80 | 9.5 | 0.44          |
| 0 | 0 | 80 | 10  | 0.37          | 30 | 0 | 80 | 10  | 0.37          | 60 | 0 | 80 | 10  | 0.37          | 90 | 0 | 80 | 10  | 0.37          |
| 0 | 0 | 80 | 12  | 0.17          | 30 | 0 | 80 | 12  | 0.17          | 60 | 0 | 80 | 12  | 0.17          | 90 | 0 | 80 | 12  | 0.17          |
| 0 | 0 | 80 | 15  | 0.05          | 30 | 0 | 80 | 15  | 0.05          | 60 | 0 | 80 | 15  | 0.05          | 90 | 0 | 80 | 15  | 0.05          |
| 0 | 0 | 80 | 20  | 0.00          | 30 | 0 | 80 | 20  | 0.00          | 60 | 0 | 80 | 20  | 0.00          | 90 | 0 | 80 | 20  | 0.00          |
| 0 | 0 | 90 | 2.5 | 1047.14       | 30 | 0 | 90 | 2.5 | 1047.10       | 60 | 0 | 90 | 2.5 | 1047.10       | 90 | 0 | 90 | 2.5 | 1047.14       |
| 0 | 0 | 90 | 2.6 | 591.78        | 30 | 0 | 90 | 2.6 | 591.74        | 60 | 0 | 90 | 2.6 | 591.74        | 90 | 0 | 90 | 2.6 | 591.78        |
| 0 | 0 | 90 | 2.7 | 349.12        | 30 | 0 | 90 | 2.7 | 349.09        | 60 | 0 | 90 | 2.7 | 349.09        | 90 | 0 | 90 | 2.7 | 349.12        |
| 0 | 0 | 90 | 2.8 | 186.63        | 30 | 0 | 90 | 2.8 | 186.60        | 60 | 0 | 90 | 2.8 | 186.60        | 90 | 0 | 90 | 2.8 | 186.63        |
| 0 | 0 | 90 | 2.9 | 80.49         | 30 | 0 | 90 | 2.9 | 80.46         | 60 | 0 | 90 | 2.9 | 80.46         | 90 | 0 | 90 | 2.9 | 80.49         |
| 0 | 0 | 90 | 3   | 13.46         | 30 | 0 | 90 | 3   | 13.43         | 60 | 0 | 90 | 3   | 13.43         | 90 | 0 | 90 | 3   | 13.46         |
| 0 | 0 | 90 | 3.1 | -26.84        | 30 | 0 | 90 | 3.1 | -26.87        | 60 | 0 | 90 | 3.1 | -26.87        | 90 | 0 | 90 | 3.1 | -26.84        |
| 0 | 0 | 90 | 3.2 | -49.18        | 30 | 0 | 90 | 3.2 | -49.20        | 60 | 0 | 90 | 3.2 | -49.20        | 90 | 0 | 90 | 3.2 | -49.18        |
| 0 | 0 | 90 | 3.3 | -59.71        | 30 | 0 | 90 | 3.3 | -59.72        | 60 | 0 | 90 | 3.3 | -59.72        | 90 | 0 | 90 | 3.3 | -59.71        |
| 0 | 0 | 90 | 3.4 | <b>-62.70</b> | 30 | 0 | 90 | 3.4 | <b>-62.71</b> | 60 | 0 | 90 | 3.4 | <b>-62.71</b> | 90 | 0 | 90 | 3.4 | <b>-62.70</b> |
| 0 | 0 | 90 | 3.5 | -61.09        | 30 | 0 | 90 | 3.5 | -61.10        | 60 | 0 | 90 | 3.5 | -61.10        | 90 | 0 | 90 | 3.5 | -61.09        |
| 0 | 0 | 90 | 3.6 | -56.87        | 30 | 0 | 90 | 3.6 | -56.89        | 60 | 0 | 90 | 3.6 | -56.89        | 90 | 0 | 90 | 3.6 | -56.87        |
| 0 | 0 | 90 | 3.7 | -51.36        | 30 | 0 | 90 | 3.7 | -51.37        | 60 | 0 | 90 | 3.7 | -51.37        | 90 | 0 | 90 | 3.7 | -51.36        |
| 0 | 0 | 90 | 3.8 | -45.38        | 30 | 0 | 90 | 3.8 | -45.39        | 60 | 0 | 90 | 3.8 | -45.39        | 90 | 0 | 90 | 3.8 | -45.38        |
| 0 | 0 | 90 | 3.9 | -39.44        | 30 | 0 | 90 | 3.9 | -39.45        | 60 | 0 | 90 | 3.9 | -39.45        | 90 | 0 | 90 | 3.9 | -39.44        |
| 0 | 0 | 90 | 4   | -33.83        | 30 | 0 | 90 | 4   | -33.83        | 60 | 0 | 90 | 4   | -33.83        | 90 | 0 | 90 | 4   | -33.83        |
| 0 | 0 | 90 | 4.1 | -28.70        | 30 | 0 | 90 | 4.1 | -28.71        | 60 | 0 | 90 | 4.1 | -28.71        | 90 | 0 | 90 | 4.1 | -28.70        |
| 0 | 0 | 90 | 4.2 | -24.12        | 30 | 0 | 90 | 4.2 | -24.12        | 60 | 0 | 90 | 4.2 | -24.12        | 90 | 0 | 90 | 4.2 | -24.12        |
| 0 | 0 | 90 | 4.3 | -20.09        | 30 | 0 | 90 | 4.3 | -20.10        | 60 | 0 | 90 | 4.3 | -20.10        | 90 | 0 | 90 | 4.3 | -20.09        |
| 0 | 0 | 90 | 4.4 | -16.59        | 30 | 0 | 90 | 4.4 | -16.60        | 60 | 0 | 90 | 4.4 | -16.60        | 90 | 0 | 90 | 4.4 | -16.59        |
| 0 | 0 | 90 | 4.5 | -13.59        | 30 | 0 | 90 | 4.5 | -13.59        | 60 | 0 | 90 | 4.5 | -13.59        | 90 | 0 | 90 | 4.5 | -13.59        |
| 0 | 0 | 90 | 4.6 | -11.03        | 30 | 0 | 90 | 4.6 | -11.04        | 60 | 0 | 90 | 4.6 | -11.04        | 90 | 0 | 90 | 4.6 | -11.03        |
| 0 | 0 | 90 | 4.7 | -8.87         | 30 | 0 | 90 | 4.7 | -8.87         | 60 | 0 | 90 | 4.7 | -8.87         | 90 | 0 | 90 | 4.7 | -8.87         |
| 0 | 0 | 90 | 4.8 | -7.05         | 30 | 0 | 90 | 4.8 | -7.05         | 60 | 0 | 90 | 4.8 | -7.05         | 90 | 0 | 90 | 4.8 | -7.05         |
| 0 | 0 | 90 | 4.9 | -5.53         | 30 | 0 | 90 | 4.9 | -5.53         | 60 | 0 | 90 | 4.9 | -5.53         | 90 | 0 | 90 | 4.9 | -5.53         |
| 0 | 0 | 90 | 5   | -4.26         | 30 | 0 | 90 | 5   | -4.26         | 60 | 0 | 90 | 5   | -4.26         | 90 | 0 | 90 | 5   | -4.26         |
| 0 | 0 | 90 | 5.1 | -3.20         | 30 | 0 | 90 | 5.1 | -3.20         | 60 | 0 | 90 | 5.1 | -3.20         | 90 | 0 | 90 | 5.1 | -3.20         |
| 0 | 0 | 90 | 5.2 | -2.33         | 30 | 0 | 90 | 5.2 | -2.33         | 60 | 0 | 90 | 5.2 | -2.33         | 90 | 0 | 90 | 5.2 | -2.33         |
| 0 | 0 | 90 | 5.3 | -1.61         | 30 | 0 | 90 | 5.3 | -1.61         | 60 | 0 | 90 | 5.3 | -1.61         | 90 | 0 | 90 | 5.3 | -1.61         |
| 0 | 0 | 90 | 5.4 | -1.01         | 30 | 0 | 90 | 5.4 | -1.02         | 60 | 0 | 90 | 5.4 | -1.02         | 90 | 0 | 90 | 5.4 | -1.01         |
| 0 | 0 | 90 | 5.5 | -0.53         | 30 | 0 | 90 | 5.5 | -0.53         | 60 | 0 | 90 | 5.5 | -0.53         | 90 | 0 | 90 | 5.5 | -0.53         |
| 0 | 0 | 90 | 5.6 | -0.14         | 30 | 0 | 90 | 5.6 | -0.14         | 60 | 0 | 90 | 5.6 | -0.14         | 90 | 0 | 90 | 5.6 | -0.14         |
| 0 | 0 | 90 | 5.7 | 0.18          | 30 | 0 | 90 | 5.7 | 0.18          | 60 | 0 | 90 | 5.7 | 0.18          | 90 | 0 | 90 | 5.7 | 0.18          |
| 0 | 0 | 90 | 5.8 | 0.44          | 30 | 0 | 90 | 5.8 | 0.44          | 60 | 0 | 90 | 5.8 | 0.44          | 90 | 0 | 90 | 5.8 | 0.44          |
| 0 | 0 | 90 | 5.9 | 0.65          | 30 | 0 | 90 | 5.9 | 0.65          | 60 | 0 | 90 | 5.9 | 0.65          | 90 | 0 | 90 | 5.9 | 0.65          |
| 0 | 0 | 90 | 6   | 0.81          | 30 | 0 | 90 | 6   | 0.81          | 60 | 0 | 90 | 6   | 0.81          | 90 | 0 | 90 | 6   | 0.81          |
| 0 | 0 | 90 | 6.5 | 1.18          | 30 | 0 | 90 | 6.5 |               |    |   |    |     |               |    |   |    |     |               |

|   |    |    |     |           |    |    |    |     |           |    |    |    |     |           |    |    |    |     |           |
|---|----|----|-----|-----------|----|----|----|-----|-----------|----|----|----|-----|-----------|----|----|----|-----|-----------|
| 0 | 15 | 0  | 2.9 | 104595.57 | 30 | 15 | 0  | 2.9 | 104595.57 | 60 | 15 | 0  | 2.9 | 104595.57 | 90 | 15 | 0  | 2.9 | 104595.57 |
| 0 | 15 | 0  | 3   | 77709.48  | 30 | 15 | 0  | 3   | 77709.48  | 60 | 15 | 0  | 3   | 77709.48  | 90 | 15 | 0  | 3   | 77709.48  |
| 0 | 15 | 0  | 3.1 | 61708.56  | 30 | 15 | 0  | 3.1 | 61708.56  | 60 | 15 | 0  | 3.1 | 61708.56  | 90 | 15 | 0  | 3.1 | 61708.56  |
| 0 | 15 | 0  | 3.2 | 46277.64  | 30 | 15 | 0  | 3.2 | 46277.64  | 60 | 15 | 0  | 3.2 | 46277.64  | 90 | 15 | 0  | 3.2 | 46277.64  |
| 0 | 15 | 0  | 3.3 | 34741.12  | 30 | 15 | 0  | 3.3 | 34741.12  | 60 | 15 | 0  | 3.3 | 34741.12  | 90 | 15 | 0  | 3.3 | 34741.12  |
| 0 | 15 | 0  | 3.4 | 26087.28  | 30 | 15 | 0  | 3.4 | 26087.28  | 60 | 15 | 0  | 3.4 | 26087.28  | 90 | 15 | 0  | 3.4 | 26087.28  |
| 0 | 15 | 0  | 3.5 | 19574.76  | 30 | 15 | 0  | 3.5 | 19574.76  | 60 | 15 | 0  | 3.5 | 19574.76  | 90 | 15 | 0  | 3.5 | 19574.76  |
| 0 | 15 | 0  | 3.6 | 14559.06  | 30 | 15 | 0  | 3.6 | 14559.06  | 60 | 15 | 0  | 3.6 | 14559.06  | 90 | 15 | 0  | 3.6 | 14559.06  |
| 0 | 15 | 0  | 3.7 | 10739.27  | 30 | 15 | 0  | 3.7 | 10739.27  | 60 | 15 | 0  | 3.7 | 10739.27  | 90 | 15 | 0  | 3.7 | 10739.27  |
| 0 | 15 | 0  | 3.8 | 7844.51   | 30 | 15 | 0  | 3.8 | 7844.51   | 60 | 15 | 0  | 3.8 | 7844.51   | 90 | 15 | 0  | 3.8 | 7844.51   |
| 0 | 15 | 0  | 3.9 | 5665.57   | 30 | 15 | 0  | 3.9 | 5665.57   | 60 | 15 | 0  | 3.9 | 5665.57   | 90 | 15 | 0  | 3.9 | 5665.57   |
| 0 | 15 | 0  | 4   | 4038.26   | 30 | 15 | 0  | 4   | 4038.26   | 60 | 15 | 0  | 4   | 4038.26   | 90 | 15 | 0  | 4   | 4038.26   |
| 0 | 15 | 0  | 4.1 | 2833.31   | 30 | 15 | 0  | 4.1 | 2833.31   | 60 | 15 | 0  | 4.1 | 2833.31   | 90 | 15 | 0  | 4.1 | 2833.31   |
| 0 | 15 | 0  | 4.2 | 1949.22   | 30 | 15 | 0  | 4.2 | 1949.22   | 60 | 15 | 0  | 4.2 | 1949.22   | 90 | 15 | 0  | 4.2 | 1949.22   |
| 0 | 15 | 0  | 4.3 | 1306.90   | 30 | 15 | 0  | 4.3 | 1306.90   | 60 | 15 | 0  | 4.3 | 1306.90   | 90 | 15 | 0  | 4.3 | 1306.90   |
| 0 | 15 | 0  | 4.4 | 845.36    | 30 | 15 | 0  | 4.4 | 845.36    | 60 | 15 | 0  | 4.4 | 845.36    | 90 | 15 | 0  | 4.4 | 845.36    |
| 0 | 15 | 0  | 4.5 | 517.98    | 30 | 15 | 0  | 4.5 | 517.98    | 60 | 15 | 0  | 4.5 | 517.98    | 90 | 15 | 0  | 4.5 | 517.98    |
| 0 | 15 | 0  | 4.6 | 289.22    | 30 | 15 | 0  | 4.6 | 289.22    | 60 | 15 | 0  | 4.6 | 289.22    | 90 | 15 | 0  | 4.6 | 289.22    |
| 0 | 15 | 0  | 4.7 | 132.42    | 30 | 15 | 0  | 4.7 | 132.42    | 60 | 15 | 0  | 4.7 | 132.42    | 90 | 15 | 0  | 4.7 | 132.42    |
| 0 | 15 | 0  | 4.8 | 27.59     | 30 | 15 | 0  | 4.8 | 27.59     | 60 | 15 | 0  | 4.8 | 27.59     | 90 | 15 | 0  | 4.8 | 27.59     |
| 0 | 15 | 0  | 4.9 | -40.17    | 30 | 15 | 0  | 4.9 | -40.17    | 60 | 15 | 0  | 4.9 | -40.17    | 90 | 15 | 0  | 4.9 | -40.17    |
| 0 | 15 | 0  | 5   | -81.87    | 30 | 15 | 0  | 5   | -81.87    | 60 | 15 | 0  | 5   | -81.87    | 90 | 15 | 0  | 5   | -81.87    |
| 0 | 15 | 0  | 5.1 | -105.54   | 30 | 15 | 0  | 5.1 | -105.54   | 60 | 15 | 0  | 5.1 | -105.54   | 90 | 15 | 0  | 5.1 | -105.54   |
| 0 | 15 | 0  | 5.2 | -116.93   | 30 | 15 | 0  | 5.2 | -116.93   | 60 | 15 | 0  | 5.2 | -116.93   | 90 | 15 | 0  | 5.2 | -116.93   |
| 0 | 15 | 0  | 5.3 | -120.14   | 30 | 15 | 0  | 5.3 | -120.14   | 60 | 15 | 0  | 5.3 | -120.14   | 90 | 15 | 0  | 5.3 | -120.14   |
| 0 | 15 | 0  | 5.4 | -118.07   | 30 | 15 | 0  | 5.4 | -118.07   | 60 | 15 | 0  | 5.4 | -118.07   | 90 | 15 | 0  | 5.4 | -118.07   |
| 0 | 15 | 0  | 5.5 | -112.77   | 30 | 15 | 0  | 5.5 | -112.77   | 60 | 15 | 0  | 5.5 | -112.77   | 90 | 15 | 0  | 5.5 | -112.77   |
| 0 | 15 | 0  | 5.6 | -105.63   | 30 | 15 | 0  | 5.6 | -105.63   | 60 | 15 | 0  | 5.6 | -105.63   | 90 | 15 | 0  | 5.6 | -105.63   |
| 0 | 15 | 0  | 5.7 | -97.63    | 30 | 15 | 0  | 5.7 | -97.63    | 60 | 15 | 0  | 5.7 | -97.63    | 90 | 15 | 0  | 5.7 | -97.63    |
| 0 | 15 | 0  | 5.8 | -89.39    | 30 | 15 | 0  | 5.8 | -89.39    | 60 | 15 | 0  | 5.8 | -89.39    | 90 | 15 | 0  | 5.8 | -89.39    |
| 0 | 15 | 0  | 5.9 | -81.32    | 30 | 15 | 0  | 5.9 | -81.32    | 60 | 15 | 0  | 5.9 | -81.32    | 90 | 15 | 0  | 5.9 | -81.32    |
| 0 | 15 | 0  | 6   | -73.63    | 30 | 15 | 0  | 6   | -73.63    | 60 | 15 | 0  | 6   | -73.63    | 90 | 15 | 0  | 6   | -73.63    |
| 0 | 15 | 0  | 6.5 | -43.71    | 30 | 15 | 0  | 6.5 | -43.71    | 60 | 15 | 0  | 6.5 | -43.71    | 90 | 15 | 0  | 6.5 | -43.71    |
| 0 | 15 | 0  | 7   | -26.26    | 30 | 15 | 0  | 7   | -26.26    | 60 | 15 | 0  | 7   | -26.26    | 90 | 15 | 0  | 7   | -26.26    |
| 0 | 15 | 0  | 7.5 | -16.43    | 30 | 15 | 0  | 7.5 | -16.43    | 60 | 15 | 0  | 7.5 | -16.43    | 90 | 15 | 0  | 7.5 | -16.43    |
| 0 | 15 | 0  | 8   | -10.73    | 30 | 15 | 0  | 8   | -10.73    | 60 | 15 | 0  | 8   | -10.73    | 90 | 15 | 0  | 8   | -10.73    |
| 0 | 15 | 0  | 8.5 | -7.27     | 30 | 15 | 0  | 8.5 | -7.27     | 60 | 15 | 0  | 8.5 | -7.27     | 90 | 15 | 0  | 8.5 | -7.27     |
| 0 | 15 | 0  | 9   | -5.09     | 30 | 15 | 0  | 9   | -5.09     | 60 | 15 | 0  | 9   | -5.09     | 90 | 15 | 0  | 9   | -5.09     |
| 0 | 15 | 0  | 9.5 | -3.65     | 30 | 15 | 0  | 9.5 | -3.65     | 60 | 15 | 0  | 9.5 | -3.65     | 90 | 15 | 0  | 9.5 | -3.65     |
| 0 | 15 | 0  | 10  | -2.67     | 30 | 15 | 0  | 10  | -2.67     | 60 | 15 | 0  | 10  | -2.67     | 90 | 15 | 0  | 10  | -2.67     |
| 0 | 15 | 0  | 12  | -0.90     | 30 | 15 | 0  | 12  | -0.90     | 60 | 15 | 0  | 12  | -0.90     | 90 | 15 | 0  | 12  | -0.90     |
| 0 | 15 | 0  | 15  | -0.22     | 30 | 15 | 0  | 15  | -0.22     | 60 | 15 | 0  | 15  | -0.22     | 90 | 15 | 0  | 15  | -0.22     |
| 0 | 15 | 0  | 20  | 0.00      | 30 | 15 | 0  | 20  | 0.00      | 60 | 15 | 0  | 20  | 0.00      | 90 | 15 | 0  | 20  | 0.00      |
| 0 | 15 | 10 | 2.5 | 206256.96 | 30 | 15 | 10 | 2.5 | 214745.36 | 60 | 15 | 10 | 2.5 | 240741.21 | 90 | 15 | 10 | 2.5 | 285093.53 |
| 0 | 15 | 10 | 2.6 | 153746.11 | 30 | 15 | 10 | 2.6 | 158909.88 | 60 | 15 | 10 | 2.6 | 174411.64 | 90 | 15 | 10 | 2.6 | 199878.56 |
| 0 | 15 | 10 | 2.7 | 117951.77 | 30 | 15 | 10 | 2.7 | 120869.98 | 60 | 15 | 10 | 2.7 | 129282.79 | 90 | 15 | 10 | 2.7 | 141689.27 |
| 0 | 15 | 10 | 2.8 | 98949.39  | 30 | 15 | 10 | 2.8 | 100860.02 | 60 | 15 | 10 | 2.8 | 106865.67 | 90 | 15 | 10 | 2.8 | 102269.05 |
| 0 | 15 | 10 | 2.9 | 71516.16  | 30 | 15 | 10 | 2.9 | 71925.42  | 60 | 15 | 10 | 2.9 | 73081.35  | 90 | 15 | 10 | 2.9 | 74891.05  |
| 0 | 15 | 10 | 3   | 55735.82  | 30 | 15 | 10 | 3   | 55859.76  | 60 | 15 | 10 | 3   | 56210.66  | 90 | 15 | 10 | 3   | 56775.24  |
| 0 | 15 | 10 | 3.1 | 43838.71  | 30 | 15 | 10 | 3.1 | 43858.82  | 60 | 15 | 10 | 3.1 | 43908.85  | 90 | 15 | 10 | 3.1 | 43999.08  |
| 0 | 15 | 10 | 3.2 | 34374.77  | 30 | 15 | 10 | 3.2 | 34363.11  | 60 | 15 | 10 | 3.2 | 34323.38  | 90 | 15 | 10 | 3.2 | 34270.66  |
| 0 | 15 | 10 | 3.3 | 26713.78  | 30 | 15 | 10 | 3.3 | 26695.34  | 60 | 15 | 10 | 3.3 | 26637.79  | 90 | 15 | 10 | 3.3 | 26554.96  |
| 0 | 15 | 10 | 3.4 | 20543.76  | 30 | 15 | 10 | 3.4 | 20576.62  | 60 | 15 | 10 | 3.4 | 20522.27  | 90 | 15 | 10 | 3.4 | 20442.40  |
| 0 | 15 | 10 | 3.5 | 15673.56  | 30 | 15 | 10 | 3.5 | 15657.69  | 60 | 15 | 10 | 3.5 | 15609.49  | 90 | 15 | 10 | 3.5 | 15538.49  |
| 0 | 15 | 10 | 3.6 | 11798.52  | 30 | 15 | 10 | 3.6 | 11784.50  | 60 | 15 | 10 | 3.6 | 11742.54  | 90 | 15 | 10 | 3.6 | 11680.80  |
| 0 | 15 | 10 | 3.7 | 8782.69   | 30 | 15 | 10 | 3.7 | 8770.28   | 60 | 15 | 10 | 3.7 | 8733.62   | 90 | 15 | 10 | 3.7 | 8679.94   |
| 0 | 15 | 10 | 3.8 | 6461.91   | 30 | 15 | 10 | 3.8 | 6450.90   | 60 | 15 | 10 | 3.8 | 6418.66   | 90 | 15 | 10 | 3.8 | 6371.68   |
| 0 | 15 | 10 | 3.9 | 4695.13   | 30 | 15 | 10 | 3.9 | 4685.30   | 60 | 15 | 10 | 3.9 | 4656.80   | 90 | 15 | 10 | 3.9 | 4615.54   |
| 0 | 15 | 10 | 4   | 3364.06   | 30 | 15 | 10 | 4   | 3355.28   | 60 | 15 | 10 | 4   | 3330.02   | 90 | 15 | 10 | 4   | 3293.64   |
| 0 | 15 | 10 | 4.1 | 2371.44   | 30 | 15 | 10 | 4.1 | 2363.60   | 60 | 15 | 10 | 4.1 | 2341.21   | 90 | 15 | 10 | 4.1 | 2309.12   |
| 0 | 15 | 10 | 4.2 | 1638.79   | 30 | 15 | 10 | 4.2 | 1631.77   | 60 | 15 | 10 | 4.2 | 1611.96   | 90 | 15 | 10 | 4.2 | 1583.68   |
| 0 | 15 | 10 | 4.3 | 1103.74   | 30 | 15 | 10 | 4.3 | 1097.51   | 60 | 15 | 10 | 4.3 | 1080.00   | 90 | 15 | 10 | 4.3 | 1055.12   |
| 0 | 15 | 10 | 4.4 | 717.58    | 30 | 15 | 10 | 4.4 | 712.07    | 60 | 15 | 10 | 4.4 | 696.63    | 90 | 15 | 10 | 4.4 | 674.76    |
| 0 | 15 | 10 | 4.5 | 442.55    | 30 | 15 | 10 | 4.5 | 437.68    | 60 | 15 | 10 | 4.5 | 424.09    | 90 | 15 | 10 | 4.5 | 404.89    |
| 0 | 15 | 10 | 4.6 | 249.66    | 30 | 15 | 10 | 4.6 | 245.37    | 60 | 15 | 10 | 4.6 | 233.43    | 90 | 15 | 10 | 4.6 | 216.60    |
| 0 | 15 | 10 | 4.7 | 116.89    | 30 | 15 | 10 | 4.7 | 113.12    | 60 | 15 | 10 | 4.7 | 102.65    | 90 | 15 | 10 | 4.7 | 87.92     |
| 0 | 15 | 10 | 4.8 | 27.66     | 30 | 15 | 10 | 4.8 | 24.35     | 60 | 15 | 10 | 4.8 | 15.18     | 90 | 15 | 10 | 4.8 | 2.32      |
| 0 | 15 | 10 | 4.9 | -30.42    | 30 | 15 | 10 | 4.9 | -33.32    | 60 | 15 | 10 | 4.9 | -41.33    | 90 | 15 | 10 | 4.9 | -52.56    |
| 0 | 15 | 10 | 5   | -66.48    | 30 | 15 | 10 | 5   | -69.02    | 60 | 15 | 10 | 5   | -76.02    | 90 | 15 | 10 | 5   | -85.82    |
| 0 | 15 | 10 | 5.1 | -87.19    | 30 | 15 | 10 | 5.1 | -89.41    | 60 | 15 | 10 | 5.1 | -95.54    | 90 | 15 | 10 | 5.1 | -104.11   |
| 0 | 15 | 10 | 5.2 | -97.39    | 30 | 15 | 10 | 5.2 | -99.34    | 60 | 15 | 10 | 5.2 | -104.70   | 90 | 15 | 10 | 5.2 | -112.20   |
| 0 | 15 | 10 | 5.3 | -100.54   | 30 | 15 | 10 | 5.3 | -102.26   | 60 | 15 | 10 | 5.3 | -106.96   | 90 | 15 | 10 | 5.3 | -113.53   |
| 0 | 15 | 10 | 5.4 | -99.14    | 30 | 15 | 10 | 5.4 | -100.65   | 60 | 15 | 10 | 5.4 | -104.78   | 90 | 15 | 10 | 5.4 | -110.54   |
| 0 | 15 | 10 | 5.5 | -94.93    | 30 | 15 | 10 | 5.5 | -96.25    | 60 | 15 | 10 | 5.5 | -99.89    | 90 | 15 | 10 | 5.5 | -104.95   |
| 0 | 15 | 10 | 5.6 | -89.12    | 30 | 15 | 10 | 5.6 | -90.29    | 60 | 15 | 10 | 5.6 | -93.49    | 90 | 15 | 10 | 5.6 | -97.94    |
| 0 | 15 | 10 | 5.7 | -82.54    | 30 | 15 | 10 | 5.7 | -83.57    | 60 | 15 | 10 | 5.7 | -86.39    | 90 | 15 | 10 | 5.7 | -90.31    |
| 0 | 15 | 10 | 5.8 | -75.71    |    |    |    |     |           |    |    |    |     |           |    |    |    |     |           |

|   |    |    |     |          |    |    |    |     |          |    |    |    |     |          |    |    |    |     |          |
|---|----|----|-----|----------|----|----|----|-----|----------|----|----|----|-----|----------|----|----|----|-----|----------|
| 0 | 15 | 20 | 3   | 28181.82 | 30 | 15 | 20 | 3   | 28229.87 | 60 | 15 | 20 | 3   | 28372.69 | 90 | 15 | 20 | 3   | 28599.29 |
| 0 | 15 | 20 | 3.1 | 22861.50 | 30 | 15 | 20 | 3.1 | 22870.20 | 60 | 15 | 20 | 3.1 | 22895.63 | 90 | 15 | 20 | 3.1 | 22931.75 |
| 0 | 15 | 20 | 3.2 | 18365.24 | 30 | 15 | 20 | 3.2 | 18358.73 | 60 | 15 | 20 | 3.2 | 18339.23 | 90 | 15 | 20 | 3.2 | 18303.10 |
| 0 | 15 | 20 | 3.3 | 14530.84 | 30 | 15 | 20 | 3.3 | 14519.20 | 60 | 15 | 20 | 3.3 | 14484.43 | 90 | 15 | 20 | 3.3 | 14424.58 |
| 0 | 15 | 20 | 3.4 | 11341.81 | 30 | 15 | 20 | 3.4 | 11328.90 | 60 | 15 | 20 | 3.4 | 11290.64 | 90 | 15 | 20 | 3.4 | 11226.52 |
| 0 | 15 | 20 | 3.5 | 8734.00  | 30 | 15 | 20 | 3.5 | 8721.16  | 60 | 15 | 20 | 3.5 | 8683.31  | 90 | 15 | 20 | 3.5 | 8621.32  |
| 0 | 15 | 20 | 3.6 | 6636.76  | 30 | 15 | 20 | 3.6 | 6624.34  | 60 | 15 | 20 | 3.6 | 6588.02  | 90 | 15 | 20 | 3.6 | 6529.83  |
| 0 | 15 | 20 | 3.7 | 4976.17  | 30 | 15 | 20 | 3.7 | 4964.34  | 60 | 15 | 20 | 3.7 | 4929.85  | 90 | 15 | 20 | 3.7 | 4875.67  |
| 0 | 15 | 20 | 3.8 | 3680.05  | 30 | 15 | 20 | 3.8 | 3668.79  | 60 | 15 | 20 | 3.8 | 3636.25  | 90 | 15 | 20 | 3.8 | 3586.02  |
| 0 | 15 | 20 | 3.9 | 2681.65  | 30 | 15 | 20 | 3.9 | 2671.07  | 60 | 15 | 20 | 3.9 | 2640.60  | 90 | 15 | 20 | 3.9 | 2594.22  |
| 0 | 15 | 20 | 4   | 1922.17  | 30 | 15 | 20 | 4   | 1912.29  | 60 | 15 | 20 | 4   | 1883.98  | 90 | 15 | 20 | 4   | 1841.39  |
| 0 | 15 | 20 | 4.1 | 1351.34  | 30 | 15 | 20 | 4.1 | 1342.21  | 60 | 15 | 20 | 4.1 | 1316.11  | 90 | 15 | 20 | 4.1 | 1277.23  |
| 0 | 15 | 20 | 4.2 | 927.46   | 30 | 15 | 20 | 4.2 | 919.08   | 60 | 15 | 20 | 4.2 | 895.23   | 90 | 15 | 20 | 4.2 | 859.95   |
| 0 | 15 | 20 | 4.3 | 616.60   | 30 | 15 | 20 | 4.3 | 608.98   | 60 | 15 | 20 | 4.3 | 587.34   | 90 | 15 | 20 | 4.3 | 555.54   |
| 0 | 15 | 20 | 4.4 | 391.70   | 30 | 15 | 20 | 4.4 | 384.81   | 60 | 15 | 20 | 4.4 | 365.30   | 90 | 15 | 20 | 4.4 | 336.79   |
| 0 | 15 | 20 | 4.5 | 231.41   | 30 | 15 | 20 | 4.5 | 225.23   | 60 | 15 | 20 | 4.5 | 207.74   | 90 | 15 | 20 | 4.5 | 182.30   |
| 0 | 15 | 20 | 4.6 | 119.21   | 30 | 15 | 20 | 4.6 | 113.68   | 60 | 15 | 20 | 4.6 | 98.07    | 90 | 15 | 20 | 4.6 | 75.44    |
| 0 | 15 | 20 | 4.7 | 42.37    | 30 | 15 | 20 | 4.7 | 37.44    | 60 | 15 | 20 | 4.7 | 23.54    | 90 | 15 | 20 | 4.7 | 3.47     |
| 0 | 15 | 20 | 4.8 | -8.75    | 30 | 15 | 20 | 4.8 | -13.14   | 60 | 15 | 20 | 4.8 | -25.48   | 90 | 15 | 20 | 4.8 | -43.26   |
| 0 | 15 | 20 | 4.9 | -41.41   | 30 | 15 | 20 | 4.9 | -45.30   | 60 | 15 | 20 | 4.9 | -56.26   | 90 | 15 | 20 | 4.9 | -71.99   |
| 0 | 15 | 20 | 5   | -61.01   | 30 | 15 | 20 | 5   | -64.46   | 60 | 15 | 20 | 5   | -74.16   | 90 | 15 | 20 | 5   | -88.07   |
| 0 | 15 | 20 | 5.1 | -71.54   | 30 | 15 | 20 | 5.1 | -74.59   | 60 | 15 | 20 | 5.1 | -83.18   | 90 | 15 | 20 | 5.1 | -95.47   |
| 0 | 15 | 20 | 5.2 | -75.91   | 30 | 15 | 20 | 5.2 | -78.62   | 60 | 15 | 20 | 5.2 | -86.21   | 90 | 15 | 20 | 5.2 | -97.06   |
| 0 | 15 | 20 | 5.3 | -76.21   | 30 | 15 | 20 | 5.3 | -78.61   | 60 | 15 | 20 | 5.3 | -85.32   | 90 | 15 | 20 | 5.3 | -94.90   |
| 0 | 15 | 20 | 5.4 | -73.93   | 30 | 15 | 20 | 5.4 | -76.05   | 60 | 15 | 20 | 5.4 | -81.98   | 90 | 15 | 20 | 5.4 | -90.45   |
| 0 | 15 | 20 | 5.5 | -70.07   | 30 | 15 | 20 | 5.5 | -71.95   | 60 | 15 | 20 | 5.5 | -77.22   | 90 | 15 | 20 | 5.5 | -84.72   |
| 0 | 15 | 20 | 5.6 | -65.37   | 30 | 15 | 20 | 5.6 | -67.05   | 60 | 15 | 20 | 5.6 | -71.72   | 90 | 15 | 20 | 5.6 | -78.37   |
| 0 | 15 | 20 | 5.7 | -60.30   | 30 | 15 | 20 | 5.7 | -61.79   | 60 | 15 | 20 | 5.7 | -65.95   | 90 | 15 | 20 | 5.7 | -71.86   |
| 0 | 15 | 20 | 5.8 | -55.19   | 30 | 15 | 20 | 5.8 | -56.51   | 60 | 15 | 20 | 5.8 | -60.23   | 90 | 15 | 20 | 5.8 | -65.49   |
| 0 | 15 | 20 | 5.9 | -50.22   | 30 | 15 | 20 | 5.9 | -51.40   | 60 | 15 | 20 | 5.9 | -54.72   | 90 | 15 | 20 | 5.9 | -59.42   |
| 0 | 15 | 20 | 6   | -45.51   | 30 | 15 | 20 | 6   | -46.57   | 60 | 15 | 20 | 6   | -49.55   | 90 | 15 | 20 | 6   | -53.76   |
| 0 | 15 | 20 | 6.5 | -27.25   | 30 | 15 | 20 | 6.5 | -27.89   | 60 | 15 | 20 | 6.5 | -29.67   | 90 | 15 | 20 | 6.5 | -32.18   |
| 0 | 15 | 20 | 7   | -16.56   | 30 | 15 | 20 | 7   | -16.97   | 60 | 15 | 20 | 7   | -18.08   | 90 | 15 | 20 | 7   | -19.65   |
| 0 | 15 | 20 | 7.5 | -10.47   | 30 | 15 | 20 | 7.5 | -10.74   | 60 | 15 | 20 | 7.5 | -11.47   | 90 | 15 | 20 | 7.5 | -12.49   |
| 0 | 15 | 20 | 8   | -6.90    | 30 | 15 | 20 | 8   | -7.08    | 60 | 15 | 20 | 8   | -7.57    | 90 | 15 | 20 | 8   | -8.27    |
| 0 | 15 | 20 | 8.5 | -4.71    | 30 | 15 | 20 | 8.5 | -4.84    | 60 | 15 | 20 | 8.5 | -5.19    | 90 | 15 | 20 | 8.5 | -5.67    |
| 0 | 15 | 20 | 9   | -3.32    | 30 | 15 | 20 | 9   | -3.41    | 60 | 15 | 20 | 9   | -3.65    | 90 | 15 | 20 | 9   | -4.00    |
| 0 | 15 | 20 | 9.5 | -2.39    | 30 | 15 | 20 | 9.5 | -2.46    | 60 | 15 | 20 | 9.5 | -2.64    | 90 | 15 | 20 | 9.5 | -2.89    |
| 0 | 15 | 20 | 10  | -1.76    | 30 | 15 | 20 | 10  | -1.81    | 60 | 15 | 20 | 10  | -1.94    | 90 | 15 | 20 | 10  | -2.13    |
| 0 | 15 | 20 | 12  | -0.59    | 30 | 15 | 20 | 12  | -0.61    | 60 | 15 | 20 | 12  | -0.66    | 90 | 15 | 20 | 12  | -0.72    |
| 0 | 15 | 20 | 15  | -0.14    | 30 | 15 | 20 | 15  | -0.15    | 60 | 15 | 20 | 15  | -0.16    | 90 | 15 | 20 | 15  | -0.18    |
| 0 | 15 | 20 | 20  | 0.00     | 30 | 15 | 20 | 20  | 0.00     | 60 | 15 | 20 | 20  | 0.00     | 90 | 15 | 20 | 20  | 0.00     |
| 0 | 15 | 30 | 2.5 | 30283.75 | 30 | 15 | 30 | 2.5 | 30620.39 | 60 | 15 | 30 | 2.5 | 31634.04 | 90 | 15 | 30 | 2.5 | 33298.00 |
| 0 | 15 | 30 | 2.6 | 26111.75 | 30 | 15 | 30 | 2.6 | 26341.24 | 60 | 15 | 30 | 2.6 | 27018.12 | 90 | 15 | 30 | 2.6 | 28095.40 |
| 0 | 15 | 30 | 2.7 | 22208.42 | 30 | 15 | 30 | 2.7 | 22358.14 | 60 | 15 | 30 | 2.7 | 22789.61 | 90 | 15 | 30 | 2.7 | 23452.25 |
| 0 | 15 | 30 | 2.8 | 18674.99 | 30 | 15 | 30 | 2.8 | 18770.07 | 60 | 15 | 30 | 2.8 | 19036.97 | 90 | 15 | 30 | 2.8 | 19385.89 |
| 0 | 15 | 30 | 2.9 | 15465.01 | 30 | 15 | 30 | 2.9 | 15524.22 | 60 | 15 | 30 | 2.9 | 15685.22 | 90 | 15 | 30 | 2.9 | 15908.87 |
| 0 | 15 | 30 | 3   | 12637.71 | 30 | 15 | 30 | 3   | 12674.02 | 60 | 15 | 30 | 3   | 12769.02 | 90 | 15 | 30 | 3   | 12891.24 |
| 0 | 15 | 30 | 3.1 | 10191.50 | 30 | 15 | 30 | 3.1 | 10213.24 | 60 | 15 | 30 | 3.1 | 10267.17 | 90 | 15 | 30 | 3.1 | 10329.02 |
| 0 | 15 | 30 | 3.2 | 8111.30  | 30 | 15 | 30 | 3.2 | 8123.51  | 60 | 15 | 30 | 3.2 | 8151.41  | 90 | 15 | 30 | 3.2 | 8176.90  |
| 0 | 15 | 30 | 3.3 | 6371.65  | 30 | 15 | 30 | 3.3 | 6377.49  | 60 | 15 | 30 | 3.3 | 6388.40  | 90 | 15 | 30 | 3.3 | 6391.39  |
| 0 | 15 | 30 | 3.4 | 4940.01  | 30 | 15 | 30 | 3.4 | 4941.47  | 60 | 15 | 30 | 3.4 | 4941.00  | 90 | 15 | 30 | 3.4 | 4929.72  |
| 0 | 15 | 30 | 3.5 | 3779.60  | 30 | 15 | 30 | 3.5 | 3778.02  | 60 | 15 | 30 | 3.5 | 3769.87  | 90 | 15 | 30 | 3.5 | 3749.48  |
| 0 | 15 | 30 | 3.6 | 2852.51  | 30 | 15 | 30 | 3.6 | 2848.87  | 60 | 15 | 30 | 3.6 | 2835.61  | 90 | 15 | 30 | 3.6 | 2809.56  |
| 0 | 15 | 30 | 3.7 | 2121.89  | 30 | 15 | 30 | 3.7 | 2116.90  | 60 | 15 | 30 | 3.7 | 2100.44  | 90 | 15 | 30 | 3.7 | 2071.18  |
| 0 | 15 | 30 | 3.8 | 1553.63  | 30 | 15 | 30 | 3.8 | 1547.83  | 60 | 15 | 30 | 3.8 | 1529.57  | 90 | 15 | 30 | 3.8 | 1498.86  |
| 0 | 15 | 30 | 3.9 | 1117.22  | 30 | 15 | 30 | 3.9 | 1111.02  | 60 | 15 | 30 | 3.9 | 1092.00  | 90 | 15 | 30 | 3.9 | 1061.13  |
| 0 | 15 | 30 | 4   | 786.27   | 30 | 15 | 30 | 4   | 779.95   | 60 | 15 | 30 | 4   | 760.94   | 90 | 15 | 30 | 4   | 730.81   |
| 0 | 15 | 30 | 4.1 | 538.45   | 30 | 15 | 30 | 4.1 | 532.23   | 60 | 15 | 30 | 4.1 | 513.75   | 90 | 15 | 30 | 4.1 | 484.99   |
| 0 | 15 | 30 | 4.2 | 355.35   | 30 | 15 | 30 | 4.2 | 349.36   | 60 | 15 | 30 | 4.2 | 331.78   | 90 | 15 | 30 | 4.2 | 304.76   |
| 0 | 15 | 30 | 4.3 | 222.03   | 30 | 15 | 30 | 4.3 | 216.37   | 60 | 15 | 30 | 4.3 | 199.88   | 90 | 15 | 30 | 4.3 | 174.82   |
| 0 | 15 | 30 | 4.4 | 126.58   | 30 | 15 | 30 | 4.4 | 121.30   | 60 | 15 | 30 | 4.4 | 106.01   | 90 | 15 | 30 | 4.4 | 82.98    |
| 0 | 15 | 30 | 4.5 | 59.61    | 30 | 15 | 30 | 4.5 | 54.74    | 60 | 15 | 30 | 4.5 | 40.68    | 90 | 15 | 30 | 4.5 | 19.66    |
| 0 | 15 | 30 | 4.6 | 13.79    | 30 | 15 | 30 | 4.6 | 9.33     | 60 | 15 | 30 | 4.6 | -3.51    | 90 | 15 | 30 | 4.6 | -22.59   |
| 0 | 15 | 30 | 4.7 | -16.55   | 30 | 15 | 30 | 4.7 | -20.62   | 60 | 15 | 30 | 4.7 | -32.26   | 90 | 15 | 30 | 4.7 | -49.51   |
| 0 | 15 | 30 | 4.8 | -35.76   | 30 | 15 | 30 | 4.8 | -39.43   | 60 | 15 | 30 | 4.8 | -49.95   | 90 | 15 | 30 | 4.8 | -65.47   |
| 0 | 15 | 30 | 4.9 | -47.07   | 30 | 15 | 30 | 4.9 | -50.38   | 60 | 15 | 30 | 4.9 | -59.84   | 90 | 15 | 30 | 4.9 | -73.75   |
| 0 | 15 | 30 | 5   | -52.90   | 30 | 15 | 30 | 5   | -55.88   | 60 | 15 | 30 | 5   | -64.35   | 90 | 15 | 30 | 5   | -76.80   |
| 0 | 15 | 30 | 5.1 | -54.98   | 30 | 15 | 30 | 5.1 | -57.65   | 60 | 15 | 30 | 5.1 | -65.25   | 90 | 15 | 30 | 5.1 | -76.36   |
| 0 | 15 | 30 | 5.2 | -54.56   | 30 | 15 | 30 | 5.2 | -56.96   | 60 | 15 | 30 | 5.2 | -63.77   | 90 | 15 | 30 | 5.2 | -73.70   |
| 0 | 15 | 30 | 5.3 | -52.55   | 30 | 15 | 30 | 5.3 | -54.71   | 60 | 15 | 30 | 5.3 | -60.81   | 90 | 15 | 30 | 5.3 | -69.70   |
| 0 | 15 | 30 | 5.4 | -49.60   | 30 | 15 | 30 | 5.4 | -51.52   | 60 | 15 | 30 | 5.4 | -57.01   | 90 | 15 | 30 | 5.4 | -64.97   |
| 0 | 15 | 30 | 5.5 | -46.12   | 30 | 15 | 30 | 5.5 | -47.86   | 60 | 15 | 30 | 5.5 | -52.79   | 90 | 15 | 30 | 5.5 | -59.94   |
| 0 | 15 | 30 | 5.6 | -42.45   | 30 | 15 | 30 | 5.6 | -44.02   | 60 | 15 | 30 | 5.6 | -48.46   | 90 | 15 | 30 | 5.6 | -54.88   |
| 0 | 15 | 30 | 5.7 | -38.78   | 30 | 15 | 30 | 5.7 | -40.20   | 60 | 15 | 30 | 5.7 | -44.21   | 90 | 15 | 30 | 5.7 | -49.99   |
| 0 | 15 | 30 | 5.8 | -35.30   | 30 | 15 | 30 | 5.8 | -36.52   | 60 | 15 | 30 | 5.8 | -40.15   | 90 | 15 | 30 | 5.8 | -45.36   |
| 0 | 15 |    |     |          |    |    |    |     |          |    |    |    |     |          |    |    |    |     |          |

|   |    |    |     |               |    |    |    |     |               |    |    |    |     |               |    |    |    |     |               |
|---|----|----|-----|---------------|----|----|----|-----|---------------|----|----|----|-----|---------------|----|----|----|-----|---------------|
| 0 | 15 | 40 | 3.1 | 4076.36       | 30 | 15 | 40 | 3.1 | 4093.02       | 60 | 15 | 40 | 3.1 | 4137.00       | 90 | 15 | 40 | 3.1 | 4193.49       |
| 0 | 15 | 40 | 3.2 | 3146.29       | 30 | 15 | 40 | 3.2 | 3157.20       | 60 | 15 | 40 | 3.2 | 3185.09       | 90 | 15 | 40 | 3.2 | 3218.52       |
| 0 | 15 | 40 | 3.3 | 2401.30       | 30 | 15 | 40 | 3.3 | 2407.83       | 60 | 15 | 40 | 3.3 | 2423.59       | 90 | 15 | 40 | 3.3 | 2440.07       |
| 0 | 15 | 40 | 3.4 | 1810.27       | 30 | 15 | 40 | 3.4 | 1813.51       | 60 | 15 | 40 | 3.4 | 1820.30       | 90 | 15 | 40 | 3.4 | 1824.51       |
| 0 | 15 | 40 | 3.5 | 1346.05       | 30 | 15 | 40 | 3.5 | 1346.88       | 60 | 15 | 40 | 3.5 | 1347.16       | 90 | 15 | 40 | 3.5 | 1342.71       |
| 0 | 15 | 40 | 3.6 | 985.22        | 30 | 15 | 40 | 3.6 | 984.33        | 60 | 15 | 40 | 3.6 | 980.05        | 90 | 15 | 40 | 3.6 | 969.68        |
| 0 | 15 | 40 | 3.7 | 707.85        | 30 | 15 | 40 | 3.7 | 705.77        | 60 | 15 | 40 | 3.7 | 698.41        | 90 | 15 | 40 | 3.7 | 684.21        |
| 0 | 15 | 40 | 3.8 | 497.11        | 30 | 15 | 40 | 3.8 | 494.26        | 60 | 15 | 40 | 3.8 | 484.94        | 90 | 15 | 40 | 3.8 | 468.48        |
| 0 | 15 | 40 | 3.9 | 339.01        | 30 | 15 | 40 | 3.9 | 335.69        | 60 | 15 | 40 | 3.9 | 325.25        | 90 | 15 | 40 | 3.9 | 307.67        |
| 0 | 15 | 40 | 4   | 221.96        | 30 | 15 | 40 | 4   | 218.39        | 60 | 15 | 40 | 4   | 207.45        | 90 | 15 | 40 | 4   | 189.58        |
| 0 | 15 | 40 | 4.1 | 136.55        | 30 | 15 | 40 | 4.1 | 132.91        | 60 | 15 | 40 | 4.1 | 121.90        | 90 | 15 | 40 | 4.1 | 104.30        |
| 0 | 15 | 40 | 4.2 | 75.27         | 30 | 15 | 40 | 4.2 | 71.67         | 60 | 15 | 40 | 4.2 | 60.90         | 90 | 15 | 40 | 4.2 | 43.95         |
| 0 | 15 | 40 | 4.3 | 32.19         | 30 | 15 | 40 | 4.3 | 28.71         | 60 | 15 | 40 | 4.3 | 18.39         | 90 | 15 | 40 | 4.3 | 2.32          |
| 0 | 15 | 40 | 4.4 | 2.71          | 30 | 15 | 40 | 4.4 | -0.61         | 60 | 15 | 40 | 4.4 | -10.36        | 90 | 15 | 40 | 4.4 | -25.41        |
| 0 | 15 | 40 | 4.5 | -16.76        | 30 | 15 | 40 | 4.5 | -19.88        | 60 | 15 | 40 | 4.5 | -28.99        | 90 | 15 | 40 | 4.5 | -42.95        |
| 0 | 15 | 40 | 4.6 | -28.96        | 30 | 15 | 40 | 4.6 | -31.86        | 60 | 15 | 40 | 4.6 | -40.31        | 90 | 15 | 40 | 4.6 | -53.16        |
| 0 | 15 | 40 | 4.7 | -35.98        | 30 | 15 | 40 | 4.7 | -38.66        | 60 | 15 | 40 | 4.7 | -46.43        | 90 | 15 | 40 | 4.7 | -58.21        |
| 0 | 15 | 40 | 4.8 | -39.37        | 30 | 15 | 40 | 4.8 | -41.83        | 60 | 15 | 40 | 4.8 | -48.96        | 90 | 15 | 40 | 4.8 | -59.71        |
| 0 | 15 | 40 | 4.9 | <b>-40.29</b> | 30 | 15 | 40 | 4.9 | <b>-42.54</b> | 60 | 15 | 40 | 4.9 | <b>-49.05</b> | 90 | 15 | 40 | 4.9 | -58.84        |
| 0 | 15 | 40 | 5   | -39.56        | 30 | 15 | 40 | 5   | -41.62        | 60 | 15 | 40 | 5   | -47.56        | 90 | 15 | 40 | 5   | -56.46        |
| 0 | 15 | 40 | 5.1 | -37.80        | 30 | 15 | 40 | 5.1 | -39.67        | 60 | 15 | 40 | 5.1 | -45.10        | 90 | 15 | 40 | 5.1 | -53.18        |
| 0 | 15 | 40 | 5.2 | -35.43        | 30 | 15 | 40 | 5.2 | -37.15        | 60 | 15 | 40 | 5.2 | -42.09        | 90 | 15 | 40 | 5.2 | -49.43        |
| 0 | 15 | 40 | 5.3 | -32.76        | 30 | 15 | 40 | 5.3 | -34.33        | 60 | 15 | 40 | 5.3 | -38.84        | 90 | 15 | 40 | 5.3 | -45.51        |
| 0 | 15 | 40 | 5.4 | -30.00        | 30 | 15 | 40 | 5.4 | -31.43        | 60 | 15 | 40 | 5.4 | -35.54        | 90 | 15 | 40 | 5.4 | -41.60        |
| 0 | 15 | 40 | 5.5 | -27.27        | 30 | 15 | 40 | 5.5 | -28.58        | 60 | 15 | 40 | 5.5 | -32.33        | 90 | 15 | 40 | 5.5 | -37.84        |
| 0 | 15 | 40 | 5.6 | -24.66        | 30 | 15 | 40 | 5.6 | -25.85        | 60 | 15 | 40 | 5.6 | -29.28        | 90 | 15 | 40 | 5.6 | -34.30        |
| 0 | 15 | 40 | 5.7 | -22.21        | 30 | 15 | 40 | 5.7 | -23.31        | 60 | 15 | 40 | 5.7 | -26.44        | 90 | 15 | 40 | 5.7 | -31.02        |
| 0 | 15 | 40 | 5.8 | -19.96        | 30 | 15 | 40 | 5.8 | -20.96        | 60 | 15 | 40 | 5.8 | -23.82        | 90 | 15 | 40 | 5.8 | -28.01        |
| 0 | 15 | 40 | 5.9 | -17.91        | 30 | 15 | 40 | 5.9 | -18.83        | 60 | 15 | 40 | 5.9 | -21.45        | 90 | 15 | 40 | 5.9 | -25.27        |
| 0 | 15 | 40 | 6   | -16.05        | 30 | 15 | 40 | 6   | -16.90        | 60 | 15 | 40 | 6   | -19.30        | 90 | 15 | 40 | 6   | -22.80        |
| 0 | 15 | 40 | 6.5 | -9.36         | 30 | 15 | 40 | 6.5 | -9.92         | 60 | 15 | 40 | 6.5 | -11.49        | 90 | 15 | 40 | 6.5 | -13.78        |
| 0 | 15 | 40 | 7   | -5.64         | 30 | 15 | 40 | 7   | -6.02         | 60 | 15 | 40 | 7   | -7.09         | 90 | 15 | 40 | 7   | -8.63         |
| 0 | 15 | 40 | 7.5 | -3.56         | 30 | 15 | 40 | 7.5 | -3.82         | 60 | 15 | 40 | 7.5 | -4.56         | 90 | 15 | 40 | 7.5 | -5.63         |
| 0 | 15 | 40 | 8   | -2.33         | 30 | 15 | 40 | 8   | -2.52         | 60 | 15 | 40 | 8   | -3.05         | 90 | 15 | 40 | 8   | -3.80         |
| 0 | 15 | 40 | 8.5 | -1.58         | 30 | 15 | 40 | 8.5 | -1.72         | 60 | 15 | 40 | 8.5 | -2.10         | 90 | 15 | 40 | 8.5 | -2.65         |
| 0 | 15 | 40 | 9   | -1.11         | 30 | 15 | 40 | 9   | -1.21         | 60 | 15 | 40 | 9   | -1.49         | 90 | 15 | 40 | 9   | -1.89         |
| 0 | 15 | 40 | 9.5 | -0.79         | 30 | 15 | 40 | 9.5 | -0.87         | 60 | 15 | 40 | 9.5 | -1.08         | 90 | 15 | 40 | 9.5 | -1.38         |
| 0 | 15 | 40 | 10  | -0.58         | 30 | 15 | 40 | 10  | -0.63         | 60 | 15 | 40 | 10  | -0.80         | 90 | 15 | 40 | 10  | -1.02         |
| 0 | 15 | 40 | 12  | -0.19         | 30 | 15 | 40 | 12  | -0.21         | 60 | 15 | 40 | 12  | -0.27         | 90 | 15 | 40 | 12  | -0.35         |
| 0 | 15 | 40 | 15  | -0.04         | 30 | 15 | 40 | 15  | -0.05         | 60 | 15 | 40 | 15  | -0.07         | 90 | 15 | 40 | 15  | -0.09         |
| 0 | 15 | 40 | 20  | 0.00          | 30 | 15 | 40 | 20  | 0.00          | 60 | 15 | 40 | 20  | 0.00          | 90 | 15 | 40 | 20  | 0.00          |
| 0 | 15 | 50 | 2.5 | 8104.97       | 30 | 15 | 50 | 2.5 | 8147.39       | 60 | 15 | 50 | 2.5 | 8272.02       | 90 | 15 | 50 | 2.5 | 8466.67       |
| 0 | 15 | 50 | 2.6 | 6234.04       | 30 | 15 | 50 | 2.6 | 6268.41       | 60 | 15 | 50 | 2.6 | 6367.83       | 90 | 15 | 50 | 2.6 | 6519.33       |
| 0 | 15 | 50 | 2.7 | 4768.99       | 30 | 15 | 50 | 2.7 | 4796.11       | 60 | 15 | 50 | 2.7 | 4873.33       | 90 | 15 | 50 | 2.7 | 4988.23       |
| 0 | 15 | 50 | 2.8 | 3625.47       | 30 | 15 | 50 | 2.8 | 3646.25       | 60 | 15 | 50 | 2.8 | 3704.61       | 90 | 15 | 50 | 2.8 | 3789.37       |
| 0 | 15 | 50 | 2.9 | 2736.19       | 30 | 15 | 50 | 2.9 | 2751.67       | 60 | 15 | 50 | 2.9 | 2794.45       | 90 | 15 | 50 | 2.9 | 2854.92       |
| 0 | 15 | 50 | 3   | 2047.67       | 30 | 15 | 50 | 3   | 2058.81       | 60 | 15 | 50 | 3   | 2089.01       | 90 | 15 | 50 | 3   | 2130.28       |
| 0 | 15 | 50 | 3.1 | 1517.30       | 30 | 15 | 50 | 3.1 | 1524.97       | 60 | 15 | 50 | 3.1 | 1545.20       | 90 | 15 | 50 | 3.1 | 1571.60       |
| 0 | 15 | 50 | 3.2 | 1111.13       | 30 | 15 | 50 | 3.2 | 1116.06       | 60 | 15 | 50 | 3.2 | 1128.58       | 90 | 15 | 50 | 3.2 | 1143.67       |
| 0 | 15 | 50 | 3.3 | 802.11        | 30 | 15 | 50 | 3.3 | 804.94        | 60 | 15 | 50 | 3.3 | 811.61        | 90 | 15 | 50 | 3.3 | 818.28        |
| 0 | 15 | 50 | 3.4 | 568.74        | 30 | 15 | 50 | 3.4 | 570.00        | 60 | 15 | 50 | 3.4 | 572.32        | 90 | 15 | 50 | 3.4 | 572.88        |
| 0 | 15 | 50 | 3.5 | 394.03        | 30 | 15 | 50 | 3.5 | 394.14        | 60 | 15 | 50 | 3.5 | 393.31        | 90 | 15 | 50 | 3.5 | 389.53        |
| 0 | 15 | 50 | 3.6 | 264.59        | 30 | 15 | 50 | 3.6 | 263.87        | 60 | 15 | 50 | 3.6 | 260.82        | 90 | 15 | 50 | 3.6 | 254.07        |
| 0 | 15 | 50 | 3.7 | 169.90        | 30 | 15 | 50 | 3.7 | 168.60        | 60 | 15 | 50 | 3.7 | 164.03        | 90 | 15 | 50 | 3.7 | 155.36        |
| 0 | 15 | 50 | 3.8 | 101.68        | 30 | 15 | 50 | 3.8 | 99.99         | 60 | 15 | 50 | 3.8 | 94.43         | 90 | 15 | 50 | 3.8 | 84.61         |
| 0 | 15 | 50 | 3.9 | 53.38         | 30 | 15 | 50 | 3.9 | 51.46         | 60 | 15 | 50 | 3.9 | 45.34         | 90 | 15 | 50 | 3.9 | 34.93         |
| 0 | 15 | 50 | 4   | 19.93         | 30 | 15 | 50 | 4   | 17.88         | 60 | 15 | 50 | 4   | 11.50         | 90 | 15 | 50 | 4   | 0.94          |
| 0 | 15 | 50 | 4.1 | -2.62         | 30 | 15 | 50 | 4.1 | -4.71         | 60 | 15 | 50 | 4.1 | -11.13        | 90 | 15 | 50 | 4.1 | -21.54        |
| 0 | 15 | 50 | 4.2 | -17.24        | 30 | 15 | 50 | 4.2 | -19.31        | 60 | 15 | 50 | 4.2 | -25.60        | 90 | 15 | 50 | 4.2 | -35.67        |
| 0 | 15 | 50 | 4.3 | -26.14        | 30 | 15 | 50 | 4.3 | -28.15        | 60 | 15 | 50 | 4.3 | -34.22        | 90 | 15 | 50 | 4.3 | -43.82        |
| 0 | 15 | 50 | 4.4 | -30.99        | 30 | 15 | 50 | 4.4 | -32.92        | 60 | 15 | 50 | 4.4 | -38.69        | 90 | 15 | 50 | 4.4 | -47.75        |
| 0 | 15 | 50 | 4.5 | -33.02        | 30 | 15 | 50 | 4.5 | -34.85        | 60 | 15 | 50 | 4.5 | <b>-40.29</b> | 90 | 15 | 50 | 4.5 | <b>-48.78</b> |
| 0 | 15 | 50 | 4.6 | <b>-33.15</b> | 30 | 15 | 50 | 4.6 | <b>-34.87</b> | 60 | 15 | 50 | 4.6 | -39.98        | 90 | 15 | 50 | 4.6 | -47.87        |
| 0 | 15 | 50 | 4.7 | -32.05        | 30 | 15 | 50 | 4.7 | -33.67        | 60 | 15 | 50 | 4.7 | -38.42        | 90 | 15 | 50 | 4.7 | -45.75        |
| 0 | 15 | 50 | 4.8 | -30.22        | 30 | 15 | 50 | 4.8 | -31.72        | 60 | 15 | 50 | 4.8 | -36.14        | 90 | 15 | 50 | 4.8 | -42.91        |
| 0 | 15 | 50 | 4.9 | -27.97        | 30 | 15 | 50 | 4.9 | -29.37        | 60 | 15 | 50 | 4.9 | -33.46        | 90 | 15 | 50 | 4.9 | -39.71        |
| 0 | 15 | 50 | 5   | -25.54        | 30 | 15 | 50 | 5   | -26.84        | 60 | 15 | 50 | 5   | -30.63        | 90 | 15 | 50 | 5   | -36.38        |
| 0 | 15 | 50 | 5.1 | -23.10        | 30 | 15 | 50 | 5.1 | -24.30        | 60 | 15 | 50 | 5.1 | -27.80        | 90 | 15 | 50 | 5.1 | -33.09        |
| 0 | 15 | 50 | 5.2 | -20.73        | 30 | 15 | 50 | 5.2 | -21.84        | 60 | 15 | 50 | 5.2 | -25.07        | 90 | 15 | 50 | 5.2 | -29.94        |
| 0 | 15 | 50 | 5.3 | -18.50        | 30 | 15 | 50 | 5.3 | -19.53        | 60 | 15 | 50 | 5.3 | -22.50        | 90 | 15 | 50 | 5.3 | -26.99        |
| 0 | 15 | 50 | 5.4 | -16.44        | 30 | 15 | 50 | 5.4 | -17.39        | 60 | 15 | 50 | 5.4 | -20.14        | 90 | 15 | 50 | 5.4 | -24.26        |
| 0 | 15 | 50 | 5.5 | -14.56        | 30 | 15 | 50 | 5.5 | -15.44        | 60 | 15 | 50 | 5.5 | -17.97        | 90 | 15 | 50 | 5.5 | -21.77        |
| 0 | 15 | 50 | 5.6 | -12.87        | 30 | 15 | 50 | 5.6 | -13.68        | 60 | 15 | 50 | 5.6 | -16.02        | 90 | 15 | 50 | 5.6 | -19.52        |
| 0 | 15 | 50 | 5.7 | -11.36        | 30 | 15 | 50 | 5.7 | -12.11        | 60 | 15 | 50 | 5.7 | -14.27        | 90 | 15 | 50 | 5.7 | -17.50        |
| 0 | 15 | 50 | 5.8 | -10.02        | 30 | 15 | 50 | 5.8 | -10.71        | 60 | 15 | 50 | 5.8 | -12.71        | 90 | 15 | 50 | 5.8 | -15.69        |
| 0 | 15 | 50 | 5.9 | -8.83         | 30 | 15 | 50 | 5.9 | -9.47         | 60 | 15 | 50 | 5.9 | -11.32        | 90 | 15 | 50 | 5.9 | -14.07        |
| 0 | 15 | 50 | 6   | -2.98         | 30 | 15 | 50 | 6   | -8.38         | 60 | 15 | 50 | 6   | -10.09        | 90 | 15 | 50 | 6   | -12.63        |



|   |    |    |     |         |      |    |    |     |         |    |    |    |     |         |    |    |    |     |         |
|---|----|----|-----|---------|------|----|----|-----|---------|----|----|----|-----|---------|----|----|----|-----|---------|
| 0 | 15 | 60 | 3.2 | 347.34  | 30   | 15 | 60 | 3.2 | 348.64  | 60 | 15 | 60 | 3.2 | 351.39  | 90 | 15 | 60 | 3.2 | 353.62  |
| 0 | 15 | 60 | 3.3 | 221.99  | 30   | 15 | 60 | 3.3 | 222.48  | 60 | 15 | 60 | 3.3 | 223.00  | 90 | 15 | 60 | 3.3 | 222.05  |
| 0 | 15 | 60 | 3.4 | 133.26  | 30   | 15 | 60 | 3.4 | 133.16  | 60 | 15 | 60 | 3.4 | 132.06  | 90 | 15 | 60 | 3.4 | 128.87  |
| 0 | 15 | 60 | 3.5 | 71.53   | 30   | 15 | 60 | 3.5 | 71.00   | 60 | 15 | 60 | 3.5 | 68.75   | 90 | 15 | 60 | 3.5 | 64.03   |
| 0 | 15 | 60 | 3.6 | 29.53   | 30   | 15 | 60 | 3.6 | 28.70   | 60 | 15 | 60 | 3.6 | 25.66   | 90 | 15 | 60 | 3.6 | 19.93   |
| 0 | 15 | 60 | 3.7 | 1.78    | 30   | 15 | 60 | 3.7 | 0.75    | 60 | 15 | 60 | 3.7 | -2.79   | 90 | 15 | 60 | 3.7 | -9.10   |
| 0 | 15 | 60 | 3.8 | -15.83  | 30   | 15 | 60 | 3.8 | -16.98  | 60 | 15 | 60 | 3.8 | -20.79  | 90 | 15 | 60 | 3.8 | -27.37  |
| 0 | 15 | 60 | 3.9 | -26.31  | 30   | 15 | 60 | 3.9 | -27.53  | 60 | 15 | 60 | 3.9 | -31.44  | 90 | 15 | 60 | 3.9 | -38.07  |
| 0 | 15 | 60 | 4   | -31.89  | 30   | 15 | 60 | 4   | -33.12  | 60 | 15 | 60 | 4   | -37.03  | 90 | 15 | 60 | 4   | -43.53  |
| 0 | 15 | 60 | 4.1 | -34.12  | 30   | 15 | 60 | 4.1 | -35.34  | 60 | 15 | 60 | 4.1 | -39.17  | 90 | 15 | 60 | 4.1 | -45.46  |
| 0 | 15 | 60 | 4.2 | -34.15  | 30   | 15 | 60 | 4.2 | -35.34  | 60 | 15 | 60 | 4.2 | -39.04  | 90 | 15 | 60 | 4.2 | -45.05  |
| 0 | 15 | 60 | 4.3 | -32.78  | 30   | 15 | 60 | 4.3 | -33.92  | 60 | 15 | 60 | 4.3 | -37.46  | 90 | 15 | 60 | 4.3 | -43.16  |
| 0 | 15 | 60 | 4.4 | -30.57  | 30   | 15 | 60 | 4.4 | -31.67  | 60 | 15 | 60 | 4.4 | -35.03  | 90 | 15 | 60 | 4.4 | -40.40  |
| 0 | 15 | 60 | 4.5 | -27.94  | 30   | 15 | 60 | 4.5 | -28.98  | 60 | 15 | 60 | 4.5 | -32.15  | 90 | 15 | 60 | 4.5 | -37.19  |
| 0 | 15 | 60 | 4.6 | -25.14  | 30   | 15 | 60 | 4.6 | -26.12  | 60 | 15 | 60 | 4.6 | -29.11  | 90 | 15 | 60 | 4.6 | -33.81  |
| 0 | 15 | 60 | 4.7 | -22.36  | 30   | 15 | 60 | 4.7 | -23.28  | 60 | 15 | 60 | 4.7 | -26.08  | 90 | 15 | 60 | 4.7 | -30.47  |
| 0 | 15 | 60 | 4.8 | -19.70  | 30   | 15 | 60 | 4.8 | -20.57  | 60 | 15 | 60 | 4.8 | -23.18  | 90 | 15 | 60 | 4.8 | -27.27  |
| 0 | 15 | 60 | 4.9 | -17.23  | 30   | 15 | 60 | 4.9 | -18.04  | 60 | 15 | 60 | 4.9 | -20.48  | 90 | 15 | 60 | 4.9 | -24.28  |
| 0 | 15 | 60 | 5   | -14.98  | 30   | 15 | 60 | 5   | -15.73  | 60 | 15 | 60 | 5   | -18.01  | 90 | 15 | 60 | 5   | -21.53  |
| 0 | 15 | 60 | 5.1 | -12.95  | 30   | 15 | 60 | 5.1 | -13.66  | 60 | 15 | 60 | 5.1 | -15.78  | 90 | 15 | 60 | 5.1 | -19.05  |
| 0 | 15 | 60 | 5.2 | -11.15  | 30   | 15 | 60 | 5.2 | -11.81  | 60 | 15 | 60 | 5.2 | -13.78  | 90 | 15 | 60 | 5.2 | -16.82  |
| 0 | 15 | 60 | 5.3 | -9.56   | 30   | 15 | 60 | 5.3 | -10.18  | 60 | 15 | 60 | 5.3 | -12.01  | 90 | 15 | 60 | 5.3 | -14.83  |
| 0 | 15 | 60 | 5.4 | -8.17   | 30   | 15 | 60 | 5.4 | -8.75   | 60 | 15 | 60 | 5.4 | -10.46  | 90 | 15 | 60 | 5.4 | -13.07  |
| 0 | 15 | 60 | 5.5 | -6.96   | 30   | 15 | 60 | 5.5 | -7.50   | 60 | 15 | 60 | 5.5 | -9.09   | 90 | 15 | 60 | 5.5 | -11.52  |
| 0 | 15 | 60 | 5.6 | -5.92   | 30   | 15 | 60 | 5.6 | -6.42   | 60 | 15 | 60 | 5.6 | -7.90   | 90 | 15 | 60 | 5.6 | -10.16  |
| 0 | 15 | 60 | 5.7 | -5.01   | 30   | 15 | 60 | 5.7 | -5.48   | 60 | 15 | 60 | 5.7 | -6.86   | 90 | 15 | 60 | 5.7 | -8.96   |
| 0 | 15 | 60 | 5.8 | -4.23   | 30   | 15 | 60 | 5.8 | -4.67   | 60 | 15 | 60 | 5.8 | -5.96   | 90 | 15 | 60 | 5.8 | -7.91   |
| 0 | 15 | 60 | 5.9 | -3.56   | 30   | 15 | 60 | 5.9 | -3.97   | 60 | 15 | 60 | 5.9 | -5.17   | 90 | 15 | 60 | 5.9 | -6.99   |
| 0 | 15 | 60 | 6   | -2.99   | 30   | 15 | 60 | 6   | -3.37   | 60 | 15 | 60 | 6   | -4.49   | 90 | 15 | 60 | 6   | -6.18   |
| 0 | 15 | 60 | 6.5 | -1.16   | 30   | 15 | 60 | 6.5 | -1.43   | 60 | 15 | 60 | 6.5 | -2.23   | 90 | 15 | 60 | 6.5 | -3.42   |
| 0 | 15 | 60 | 7   | -0.34   | 30   | 15 | 60 | 7   | -0.54   | 60 | 15 | 60 | 7   | -1.11   | 90 | 15 | 60 | 7   | -1.97   |
| 0 | 15 | 60 | 7.5 | 0.02    | 30   | 15 | 60 | 7.5 | -0.13   | 60 | 15 | 60 | 7.5 | -0.55   | 90 | 15 | 60 | 7.5 | -1.18   |
| 0 | 15 | 60 | 8   | 0.16    | 30   | 15 | 60 | 8   | 0.05    | 60 | 15 | 60 | 8   | -0.26   | 90 | 15 | 60 | 8   | -0.73   |
| 0 | 15 | 60 | 8.5 | 0.21    | 30   | 15 | 60 | 8.5 | 0.13    | 60 | 15 | 60 | 8.5 | -0.11   | 90 | 15 | 60 | 8.5 | -0.46   |
| 0 | 15 | 60 | 9   | 0.22    | 30   | 15 | 60 | 9   | 0.15    | 60 | 15 | 60 | 9   | -0.03   | 90 | 15 | 60 | 9   | -0.30   |
| 0 | 15 | 60 | 9.5 | 0.20    | 30   | 15 | 60 | 9.5 | 0.15    | 60 | 15 | 60 | 9.5 | 0.01    | 90 | 15 | 60 | 9.5 | -0.20   |
| 0 | 15 | 60 | 10  | 0.18    | 30   | 15 | 60 | 10  | 0.14    | 60 | 15 | 60 | 10  | 0.03    | 90 | 15 | 60 | 10  | -0.13   |
| 0 | 15 | 60 | 12  | 0.10    | 30   | 15 | 60 | 12  | 0.08    | 60 | 15 | 60 | 12  | 0.04    | 90 | 15 | 60 | 12  | -0.03   |
| 0 | 15 | 60 | 15  | 0.04    | 30   | 15 | 60 | 15  | 0.03    | 60 | 15 | 60 | 15  | 0.02    | 90 | 15 | 60 | 15  | 0.00    |
| 0 | 15 | 60 | 20  | 0.00    | 30   | 15 | 60 | 20  | 0.00    | 60 | 15 | 60 | 20  | 0.00    | 90 | 15 | 60 | 20  | 0.00    |
| 0 | 15 | 70 | 2.5 | 2016.77 | 30   | 15 | 70 | 2.5 | 2024.44 | 60 | 15 | 70 | 2.5 | 2045.56 | 90 | 15 | 70 | 2.5 | 2075.10 |
| 0 | 15 | 70 | 2.6 | 1401.05 | 30   | 15 | 70 | 2.6 | 1406.68 | 60 | 15 | 70 | 2.6 | 1421.86 | 90 | 15 | 70 | 2.6 | 1442.33 |
| 0 | 15 | 70 | 2.7 | 955.32  | 30   | 15 | 70 | 2.7 | 959.34  | 60 | 15 | 70 | 2.7 | 969.87  | 90 | 15 | 70 | 2.7 | 983.36  |
| 0 | 15 | 70 | 2.8 | 635.85  | 30   | 15 | 70 | 2.8 | 638.59  | 60 | 15 | 70 | 2.8 | 645.51  | 90 | 15 | 70 | 2.8 | 653.72  |
| 0 | 15 | 70 | 2.9 | 409.40  | 30   | 15 | 70 | 2.9 | 411.15  | 60 | 15 | 70 | 2.9 | 415.30  | 90 | 15 | 70 | 2.9 | 419.55  |
| 0 | 15 | 70 | 3   | 251.00  | 30   | 15 | 70 | 3   | 251.99  | 60 | 15 | 70 | 3   | 254.04  | 90 | 15 | 70 | 3   | 255.37  |
| 0 | 15 | 70 | 3.1 | 141.98  | 30   | 15 | 70 | 3.1 | 142.40  | 60 | 15 | 70 | 3.1 | 142.90  | 90 | 15 | 70 | 3.1 | 142.14  |
| 0 | 15 | 70 | 3.2 | 68.51   | 30   | 15 | 70 | 3.2 | 68.52   | 60 | 15 | 70 | 3.2 | 67.92   | 90 | 15 | 70 | 3.2 | 65.68   |
| 0 | 15 | 70 | 3.3 | 20.33   | 30   | 15 | 70 | 3.3 | 20.05   | 60 | 15 | 70 | 3.3 | 18.71   | 90 | 15 | 70 | 3.3 | 15.49   |
| 0 | 15 | 70 | 3.4 | -10.10  | 30   | 15 | 70 | 3.4 | -10.55  | 60 | 15 | 70 | 3.4 | -12.37  | 90 | 15 | 70 | 3.4 | -16.20  |
| 0 | 15 | 70 | 3.5 | -28.24  | 30   | 15 | 70 | 3.5 | -28.81  | 60 | 15 | 70 | 3.5 | -30.91  | 90 | 15 | 70 | 3.5 | -35.05  |
| 0 | 15 | 70 | 3.6 | -38.02  | 30   | 15 | 70 | 3.6 | -38.66  | 60 | 15 | 70 | 3.6 | -40.92  | 90 | 15 | 70 | 3.6 | -45.18  |
| 0 | 15 | 70 | 3.7 | -42.26  | 30   | 15 | 70 | 3.7 | -42.93  | 60 | 15 | 70 | 3.7 | -45.25  | 90 | 15 | 70 | 3.7 | -49.50  |
| 0 | 15 | 70 | 3.8 | -42.89  | 30   | 15 | 70 | 3.8 | -43.59  | 60 | 15 | 70 | 3.8 | -45.90  | 90 | 15 | 70 | 3.8 | -50.06  |
| 0 | 15 | 70 | 3.9 | -41.30  | 30   | 15 | 70 | 3.9 | -41.99  | 60 | 15 | 70 | 3.9 | -44.27  | 90 | 15 | 70 | 3.9 | -48.28  |
| 0 | 15 | 70 | 4   | -38.41  | 30   | 15 | 70 | 4   | -39.09  | 60 | 15 | 70 | 4   | -41.30  | 90 | 15 | 70 | 4   | -45.14  |
| 0 | 15 | 70 | 4.1 | -34.85  | 30   | 15 | 70 | 4.1 | -35.52  | 60 | 15 | 70 | 4.1 | -37.64  | 90 | 15 | 70 | 4.1 | -41.28  |
| 0 | 15 | 70 | 4.2 | -31.05  | 30   | 15 | 70 | 4.2 | -31.69  | 60 | 15 | 70 | 4.2 | -33.71  | 90 | 15 | 70 | 4.2 | -37.15  |
| 0 | 15 | 70 | 4.3 | -27.27  | 30   | 15 | 70 | 4.3 | -27.88  | 60 | 15 | 70 | 4.3 | -29.80  | 90 | 15 | 70 | 4.3 | -33.04  |
| 0 | 15 | 70 | 4.4 | -23.67  | 30   | 15 | 70 | 4.4 | -24.25  | 60 | 15 | 70 | 4.4 | -26.06  | 90 | 15 | 70 | 4.4 | -29.10  |
| 0 | 15 | 70 | 4.5 | -20.35  | 30   | 15 | 70 | 4.5 | -20.90  | 60 | 15 | 70 | 4.5 | -22.61  | 90 | 15 | 70 | 4.5 | -25.45  |
| 0 | 15 | 70 | 4.6 | -17.35  | 30   | 15 | 70 | 4.6 | -17.87  | 60 | 15 | 70 | 4.6 | -19.47  | 90 | 15 | 70 | 4.6 | -22.13  |
| 0 | 15 | 70 | 4.7 | -14.68  | 30   | 15 | 70 | 4.7 | -15.17  | 60 | 15 | 70 | 4.7 | -16.67  | 90 | 15 | 70 | 4.7 | -19.15  |
| 0 | 15 | 70 | 4.8 | -12.34  | 30   | 15 | 70 | 4.8 | -12.79  | 60 | 15 | 70 | 4.8 | -14.20  | 90 | 15 | 70 | 4.8 | -16.51  |
| 0 | 15 | 70 | 4.9 | -10.30  | 30   | 15 | 70 | 4.9 | -10.73  | 60 | 15 | 70 | 4.9 | -12.04  | 90 | 15 | 70 | 4.9 | -14.20  |
| 0 | 15 | 70 | 5   | -8.53   | 30   | 15 | 70 | 5   | -8.93   | 60 | 15 | 70 | 5   | -10.17  | 90 | 15 | 70 | 5   | -12.18  |
| 0 | 15 | 70 | 5.1 | -7.02   | 30   | 15 | 70 | 5.1 | -7.40   | 60 | 15 | 70 | 5.1 | -8.55   | 90 | 15 | 70 | 5.1 | -10.42  |
| 0 | 15 | 70 | 5.2 | -5.73   | 30   | 15 | 70 | 5.2 | -6.08   | 60 | 15 | 70 | 5.2 | -7.16   | 90 | 15 | 70 | 5.2 | -8.91   |
| 0 | 15 | 70 | 5.3 | -4.63   | 30   | 15 | 70 | 5.3 | -4.96   | 60 | 15 | 70 | 5.3 | -5.97   | 90 | 15 | 70 | 5.3 | -7.60   |
| 0 | 15 | 70 | 5.4 | -3.70   | 30   | 15 | 70 | 5.4 | -4.01   | 60 | 15 | 70 | 5.4 | -4.95   | 90 | 15 | 70 | 5.4 | -6.47   |
| 0 | 15 | 70 | 5.5 | -2.91   | 30   | 15 | 70 | 5.5 | -3.21   | 60 | 15 | 70 | 5.5 | -4.09   | 90 | 15 | 70 | 5.5 | -5.51   |
| 0 | 15 | 70 | 5.6 | -2.25   | 30   | 15 | 70 | 5.6 | -2.53   | 60 | 15 | 70 | 5.6 | -3.35   | 90 | 15 | 70 | 5.6 | -4.68   |
| 0 | 15 | 70 | 5.7 | -1.70   | 30   | 15 | 70 | 5.7 | -1.96   | 60 | 15 | 70 | 5.7 | -2.73   | 90 | 15 | 70 | 5.7 | -3.97   |
| 0 | 15 | 70 | 5.8 | -1.24   | 30   | 15 | 70 | 5.8 | -1.48   | 60 | 15 | 70 | 5.8 | -2.20   | 90 | 15 | 70 | 5.8 | -3.36   |
| 0 | 15 | 70 | 5.9 | -0.85   | 30   | 15 | 70 | 5.9 | -1.08   | 60 | 15 | 70 | 5.9 | -1.76   | 90 | 15 | 70 | 5.9 | -2.84   |
| 0 | 15 | 70 | 6   | -0.53   | 30   | 15 | 70 | 6   | -0.74   | 60 | 15 | 70 | 6   | -1.38   | 90 | 15 | 70 | 6   | -2.39   |
| 0 | 15 | 70 | 6.5 | 0.39    | 30   | 15 | 70 | 6.5 | 0.23    | 60 | 15 | 70 | 6.5 | -0.23   | 90 | 15 | 70 | 6.5 | -0.96   |
| 0 | 15 | 70 | 7   | 0.69    | 30   | 15 | 70 | 7   | 0.58    | 60 | 15 | 70 | 7   | 0.23    | 90 | 15 | 70 | 7   | -0.31   |
| 0 | 15 | 70 | 7.5 | 0.73    | 30</ |    |    |     |         |    |    |    |     |         |    |    |    |     |         |

|   |    |    |     |               |    |    |    |     |               |    |      |    |     |               |    |    |    |     |               |
|---|----|----|-----|---------------|----|----|----|-----|---------------|----|------|----|-----|---------------|----|----|----|-----|---------------|
| 0 | 15 | 80 | 3.3 | -49.11        | 30 | 15 | 80 | 3.3 | -49.07        | 60 | 15   | 80 | 3.3 | -49.49        | 90 | 15 | 80 | 3.3 | -51.41        |
| 0 | 15 | 80 | 3.4 | -56.89        | 30 | 15 | 80 | 3.4 | -56.93        | 60 | 15   | 80 | 3.4 | -57.50        | 90 | 15 | 80 | 3.4 | -59.51        |
| 0 | 15 | 80 | 3.5 | <b>-58.64</b> | 30 | 15 | 80 | 3.5 | <b>-58.74</b> | 60 | 15   | 80 | 3.5 | <b>-59.41</b> | 90 | 15 | 80 | 3.5 | <b>-61.43</b> |
| 0 | 15 | 80 | 3.6 | -56.71        | 30 | 15 | 80 | 3.6 | -56.85        | 60 | 15   | 80 | 3.6 | -57.59        | 90 | 15 | 80 | 3.6 | -59.58        |
| 0 | 15 | 80 | 3.7 | -52.69        | 30 | 15 | 80 | 3.7 | -52.85        | 60 | 15   | 80 | 3.7 | -53.63        | 90 | 15 | 80 | 3.7 | -55.56        |
| 0 | 15 | 80 | 3.8 | -47.63        | 30 | 15 | 80 | 3.8 | -47.81        | 60 | 15   | 80 | 3.8 | -48.59        | 90 | 15 | 80 | 3.8 | -50.46        |
| 0 | 15 | 80 | 3.9 | -42.21        | 30 | 15 | 80 | 3.9 | -42.40        | 60 | 15   | 80 | 3.9 | -43.17        | 90 | 15 | 80 | 3.9 | -44.95        |
| 0 | 15 | 80 | 4   | -36.84        | 30 | 15 | 80 | 4   | -37.03        | 60 | 15   | 80 | 4   | -37.79        | 90 | 15 | 80 | 4   | -39.46        |
| 0 | 15 | 80 | 4.1 | -31.76        | 30 | 15 | 80 | 4.1 | -31.95        | 60 | 15   | 80 | 4.1 | -32.68        | 90 | 15 | 80 | 4.1 | -34.26        |
| 0 | 15 | 80 | 4.2 | -27.11        | 30 | 15 | 80 | 4.2 | -27.29        | 60 | 15   | 80 | 4.2 | -27.99        | 90 | 15 | 80 | 4.2 | -29.48        |
| 0 | 15 | 80 | 4.3 | -22.94        | 30 | 15 | 80 | 4.3 | -23.11        | 60 | 15   | 80 | 4.3 | -23.78        | 90 | 15 | 80 | 4.3 | -25.17        |
| 0 | 15 | 80 | 4.4 | -19.25        | 30 | 15 | 80 | 4.4 | -19.42        | 60 | 15   | 80 | 4.4 | -20.05        | 90 | 15 | 80 | 4.4 | -21.35        |
| 0 | 15 | 80 | 4.5 | -16.04        | 30 | 15 | 80 | 4.5 | -16.20        | 60 | 15   | 80 | 4.5 | -16.80        | 90 | 15 | 80 | 4.5 | -18.01        |
| 0 | 15 | 80 | 4.6 | -13.27        | 30 | 15 | 80 | 4.6 | -13.42        | 60 | 15   | 80 | 4.6 | -13.98        | 90 | 15 | 80 | 4.6 | -15.12        |
| 0 | 15 | 80 | 4.7 | -10.89        | 30 | 15 | 80 | 4.7 | -11.04        | 60 | 15   | 80 | 4.7 | -11.57        | 90 | 15 | 80 | 4.7 | -12.62        |
| 0 | 15 | 80 | 4.8 | -8.87         | 30 | 15 | 80 | 4.8 | -9.01         | 60 | 15   | 80 | 4.8 | -9.51         | 90 | 15 | 80 | 4.8 | -10.49        |
| 0 | 15 | 80 | 4.9 | -7.16         | 30 | 15 | 80 | 4.9 | -7.29         | 60 | 15   | 80 | 4.9 | -7.76         | 90 | 15 | 80 | 4.9 | -8.68         |
| 0 | 15 | 80 | 5   | -5.72         | 30 | 15 | 80 | 5   | -5.84         | 60 | 15   | 80 | 5   | -6.28         | 90 | 15 | 80 | 5   | -7.14         |
| 0 | 15 | 80 | 5.1 | -4.51         | 30 | 15 | 80 | 5.1 | -4.62         | 60 | 15   | 80 | 5.1 | -5.03         | 90 | 15 | 80 | 5.1 | -5.84         |
| 0 | 15 | 80 | 5.2 | -3.49         | 30 | 15 | 80 | 5.2 | -3.60         | 60 | 15   | 80 | 5.2 | -3.99         | 90 | 15 | 80 | 5.2 | -4.74         |
| 0 | 15 | 80 | 5.3 | -2.64         | 30 | 15 | 80 | 5.3 | -2.75         | 60 | 15   | 80 | 5.3 | -3.11         | 90 | 15 | 80 | 5.3 | -3.81         |
| 0 | 15 | 80 | 5.4 | -1.94         | 30 | 15 | 80 | 5.4 | -2.04         | 60 | 15   | 80 | 5.4 | -2.38         | 90 | 15 | 80 | 5.4 | -3.04         |
| 0 | 15 | 80 | 5.5 | -1.36         | 30 | 15 | 80 | 5.5 | -1.45         | 60 | 15   | 80 | 5.5 | -1.77         | 90 | 15 | 80 | 5.5 | -2.39         |
| 0 | 15 | 80 | 5.6 | -0.87         | 30 | 15 | 80 | 5.6 | -0.96         | 60 | 15   | 80 | 5.6 | -1.27         | 90 | 15 | 80 | 5.6 | -1.84         |
| 0 | 15 | 80 | 5.7 | -0.48         | 30 | 15 | 80 | 5.7 | -0.56         | 60 | 15   | 80 | 5.7 | -0.85         | 90 | 15 | 80 | 5.7 | -1.38         |
| 0 | 15 | 80 | 5.8 | -0.15         | 30 | 15 | 80 | 5.8 | -0.23         | 60 | 15   | 80 | 5.8 | -0.50         | 90 | 15 | 80 | 5.8 | -1.00         |
| 0 | 15 | 80 | 5.9 | 0.11          | 30 | 15 | 80 | 5.9 | 0.04          | 60 | 15   | 80 | 5.9 | -0.22         | 90 | 15 | 80 | 5.9 | -0.69         |
| 0 | 15 | 80 | 6   | 0.33          | 30 | 15 | 80 | 6   | 0.26          | 60 | 15   | 80 | 6   | 0.02          | 90 | 15 | 80 | 6   | -0.42         |
| 0 | 15 | 80 | 6.5 | 0.90          | 30 | 15 | 80 | 6.5 | 0.84          | 60 | 15   | 80 | 6.5 | 0.66          | 90 | 15 | 80 | 6.5 | 0.34          |
| 0 | 15 | 80 | 7   | 1.01          | 30 | 15 | 80 | 7   | 0.97          | 60 | 15   | 80 | 7   | 0.83          | 90 | 15 | 80 | 7   | 0.59          |
| 0 | 15 | 80 | 7.5 | 0.95          | 30 | 15 | 80 | 7.5 | 0.91          | 60 | 15   | 80 | 7.5 | 0.81          | 90 | 15 | 80 | 7.5 | 0.63          |
| 0 | 15 | 80 | 8   | 0.83          | 30 | 15 | 80 | 8   | 0.80          | 60 | 15   | 80 | 8   | 0.72          | 90 | 15 | 80 | 8   | 0.59          |
| 0 | 15 | 80 | 8.5 | 0.70          | 30 | 15 | 80 | 8.5 | 0.68          | 60 | 15   | 80 | 8.5 | 0.62          | 90 | 15 | 80 | 8.5 | 0.52          |
| 0 | 15 | 80 | 9   | 0.59          | 30 | 15 | 80 | 9   | 0.57          | 60 | 15   | 80 | 9   | 0.52          | 90 | 15 | 80 | 9   | 0.44          |
| 0 | 15 | 80 | 9.5 | 0.49          | 30 | 15 | 80 | 9.5 | 0.47          | 60 | 15   | 80 | 9.5 | 0.43          | 90 | 15 | 80 | 9.5 | 0.37          |
| 0 | 15 | 80 | 10  | 0.40          | 30 | 15 | 80 | 10  | 0.39          | 60 | 15   | 80 | 10  | 0.36          | 90 | 15 | 80 | 10  | 0.31          |
| 0 | 15 | 80 | 12  | 0.19          | 30 | 15 | 80 | 12  | 0.18          | 60 | 15   | 80 | 12  | 0.17          | 90 | 15 | 80 | 12  | 0.15          |
| 0 | 15 | 80 | 15  | 0.06          | 30 | 15 | 80 | 15  | 0.06          | 60 | 15   | 80 | 15  | 0.05          | 90 | 15 | 80 | 15  | 0.05          |
| 0 | 15 | 80 | 20  | 0.00          | 30 | 15 | 80 | 20  | 0.00          | 60 | 15   | 80 | 20  | 0.00          | 90 | 15 | 80 | 20  | 0.00          |
| 0 | 15 | 90 | 2.5 | 994.48        | 30 | 15 | 90 | 2.5 | 996.46        | 60 | 15   | 90 | 2.5 | 989.47        | 90 | 15 | 90 | 2.5 | 995.49        |
| 0 | 15 | 90 | 2.6 | 550.71        | 30 | 15 | 90 | 2.6 | 552.50        | 60 | 15   | 90 | 2.6 | 556.14        | 90 | 15 | 90 | 2.6 | 557.99        |
| 0 | 15 | 90 | 2.7 | 316.72        | 30 | 15 | 90 | 2.7 | 318.34        | 60 | 15   | 90 | 2.7 | 321.62        | 90 | 15 | 90 | 2.7 | 323.28        |
| 0 | 15 | 90 | 2.8 | 160.75        | 30 | 15 | 90 | 2.8 | 162.20        | 60 | 15   | 90 | 2.8 | 165.11        | 90 | 15 | 90 | 2.8 | 166.60        |
| 0 | 15 | 90 | 2.9 | 59.54         | 30 | 15 | 90 | 2.9 | 60.82         | 60 | 15   | 90 | 2.9 | 63.40         | 90 | 15 | 90 | 2.9 | 64.71         |
| 0 | 15 | 90 | 3   | -3.74         | 30 | 15 | 90 | 3   | -2.61         | 60 | 15   | 90 | 3   | -0.34         | 90 | 15 | 90 | 3   | 0.82          |
| 0 | 15 | 90 | 3.1 | -41.14        | 30 | 15 | 90 | 3.1 | -40.15        | 60 | 15   | 90 | 3.1 | -38.14        | 90 | 15 | 90 | 3.1 | -37.13        |
| 0 | 15 | 90 | 3.2 | -61.22        | 30 | 15 | 90 | 3.2 | -60.34        | 60 | 15   | 90 | 3.2 | -58.57        | 90 | 15 | 90 | 3.2 | -57.68        |
| 0 | 15 | 90 | 3.3 | -69.98        | 30 | 15 | 90 | 3.3 | -69.20        | 60 | 15   | 90 | 3.3 | -67.63        | 90 | 15 | 90 | 3.3 | -66.83        |
| 0 | 15 | 90 | 3.4 | <b>-71.56</b> | 30 | 15 | 90 | 3.4 | <b>-70.87</b> | 60 | 15   | 90 | 3.4 | <b>-69.49</b> | 90 | 15 | 90 | 3.4 | <b>-68.78</b> |
| 0 | 15 | 90 | 3.5 | -68.83        | 30 | 15 | 90 | 3.5 | -68.22        | 60 | 15   | 90 | 3.5 | -66.99        | 90 | 15 | 90 | 3.5 | -66.37        |
| 0 | 15 | 90 | 3.6 | -63.70        | 30 | 15 | 90 | 3.6 | -63.16        | 60 | 15   | 90 | 3.6 | -62.08        | 90 | 15 | 90 | 3.6 | -61.52        |
| 0 | 15 | 90 | 3.7 | -57.43        | 30 | 15 | 90 | 3.7 | -56.96        | 60 | 15   | 90 | 3.7 | -55.99        | 90 | 15 | 90 | 3.7 | -55.49        |
| 0 | 15 | 90 | 3.8 | -50.82        | 30 | 15 | 90 | 3.8 | -50.39        | 60 | 15   | 90 | 3.8 | -49.53        | 90 | 15 | 90 | 3.8 | -49.09        |
| 0 | 15 | 90 | 3.9 | -44.34        | 30 | 15 | 90 | 3.9 | -43.95        | 60 | 15   | 90 | 3.9 | -43.18        | 90 | 15 | 90 | 3.9 | -42.78        |
| 0 | 15 | 90 | 4   | -38.26        | 30 | 15 | 90 | 4   | -37.92        | 60 | 15   | 90 | 4   | -37.21        | 90 | 15 | 90 | 4   | -36.86        |
| 0 | 15 | 90 | 4.1 | -32.73        | 30 | 15 | 90 | 4.1 | -32.41        | 60 | 15   | 90 | 4.1 | -31.78        | 90 | 15 | 90 | 4.1 | -31.46        |
| 0 | 15 | 90 | 4.2 | -27.79        | 30 | 15 | 90 | 4.2 | -27.50        | 60 | 15   | 90 | 4.2 | -26.93        | 90 | 15 | 90 | 4.2 | -26.63        |
| 0 | 15 | 90 | 4.3 | -23.44        | 30 | 15 | 90 | 4.3 | -23.18        | 60 | 15   | 90 | 4.3 | -22.66        | 90 | 15 | 90 | 4.3 | -22.39        |
| 0 | 15 | 90 | 4.4 | -19.66        | 30 | 15 | 90 | 4.4 | -19.43        | 60 | 15   | 90 | 4.4 | -18.95        | 90 | 15 | 90 | 4.4 | -18.70        |
| 0 | 15 | 90 | 4.5 | -16.41        | 30 | 15 | 90 | 4.5 | -16.19        | 60 | 15   | 90 | 4.5 | -15.75        | 90 | 15 | 90 | 4.5 | -15.53        |
| 0 | 15 | 90 | 4.6 | -13.62        | 30 | 15 | 90 | 4.6 | -13.43        | 60 | 15   | 90 | 4.6 | -13.02        | 90 | 15 | 90 | 4.6 | -12.82        |
| 0 | 15 | 90 | 4.7 | -11.25        | 30 | 15 | 90 | 4.7 | -11.07        | 60 | 15   | 90 | 4.7 | -10.70        | 90 | 15 | 90 | 4.7 | -10.52        |
| 0 | 15 | 90 | 4.8 | -9.24         | 30 | 15 | 90 | 4.8 | -9.08         | 60 | 15   | 90 | 4.8 | -8.74         | 90 | 15 | 90 | 4.8 | -8.57         |
| 0 | 15 | 90 | 4.9 | -7.55         | 30 | 15 | 90 | 4.9 | -7.40         | 60 | 15   | 90 | 4.9 | -7.09         | 90 | 15 | 90 | 4.9 | -6.93         |
| 0 | 15 | 90 | 5   | -6.13         | 30 | 15 | 90 | 5   | -5.99         | 60 | 15   | 90 | 5   | -5.70         | 90 | 15 | 90 | 5   | -5.55         |
| 0 | 15 | 90 | 5.1 | -4.93         | 30 | 15 | 90 | 5.1 | -4.80         | 60 | 15   | 90 | 5.1 | -4.54         | 90 | 15 | 90 | 5.1 | -4.40         |
| 0 | 15 | 90 | 5.2 | -3.93         | 30 | 15 | 90 | 5.2 | -3.81         | 60 | 15   | 90 | 5.2 | -3.56         | 90 | 15 | 90 | 5.2 | -3.44         |
| 0 | 15 | 90 | 5.3 | -3.09         | 30 | 15 | 90 | 5.3 | -2.98         | 60 | 15   | 90 | 5.3 | -2.75         | 90 | 15 | 90 | 5.3 | -2.64         |
| 0 | 15 | 90 | 5.4 | -2.39         | 30 | 15 | 90 | 5.4 | -2.28         | 60 | 15   | 90 | 5.4 | -2.08         | 90 | 15 | 90 | 5.4 | -1.97         |
| 0 | 15 | 90 | 5.5 | -1.80         | 30 | 15 | 90 | 5.5 | -1.71         | 60 | 15   | 90 | 5.5 | -1.52         | 90 | 15 | 90 | 5.5 | -1.42         |
| 0 | 15 | 90 | 5.6 | -1.32         | 30 | 15 | 90 | 5.6 | -1.23         | 60 | 15   | 90 | 5.6 | -1.05         | 90 | 15 | 90 | 5.6 | -0.96         |
| 0 | 15 | 90 | 5.7 | -0.91         | 30 | 15 | 90 | 5.7 | -0.83         | 60 | 15   | 90 | 5.7 | -0.67         | 90 | 15 | 90 | 5.7 | -0.59         |
| 0 | 15 | 90 | 5.8 | -0.58         | 30 | 15 | 90 | 5.8 | -0.50         | 60 | 15   | 90 | 5.8 | -0.35         | 90 | 15 | 90 | 5.8 | -0.27         |
| 0 | 15 | 90 | 5.9 | -0.30         | 30 | 15 | 90 | 5.9 | -0.23         | 60 | 15   | 90 | 5.9 | -0.09         | 90 | 15 | 90 | 5.9 | -0.02         |
| 0 | 15 | 90 | 6   | -0.08         | 30 | 15 | 90 | 6   | -0.01         | 60 | 15   | 90 | 6   | 0.12          | 90 | 15 | 90 | 6   | 0.19          |
| 0 | 15 | 90 | 6.5 | 0.56          | 30 | 15 | 90 | 6.5 | 0.60          | 60 | 15   | 90 | 6.5 | 0.70          | 90 | 15 | 90 | 6.5 | 0.74          |
| 0 | 15 | 90 | 7   | 0.74          | 30 | 15 | 90 | 7   | 0.77          | 60 | 15   | 90 | 7   | 0.84          | 90 | 15 | 90 | 7   | 0.87          |
| 0 | 15 | 90 | 7.5 | 0.74          | 30 | 15 | 90 | 7.5 | 0.76          | 60 | 15   | 90 | 7.5 | 0.81          | 90 | 15 | 90 | 7.5 | 0.83          |
| 0 | 15 | 90 | 8   | 0.67          | 30 | 15 | 90 | 8   | 0.68          | 60 | 15</ |    |     |               |    |    |    |     |               |

|   |    |    |     |               |    |    |    |     |               |    |    |    |     |               |    |    |    |     |               |
|---|----|----|-----|---------------|----|----|----|-----|---------------|----|----|----|-----|---------------|----|----|----|-----|---------------|
| 0 | 30 | 0  | 3.4 | 25774.77      | 30 | 30 | 0  | 3.4 | 25774.77      | 60 | 30 | 0  | 3.4 | 25774.77      | 90 | 30 | 0  | 3.4 | 25774.77      |
| 0 | 30 | 0  | 3.5 | 19435.20      | 30 | 30 | 0  | 3.5 | 19435.20      | 60 | 30 | 0  | 3.5 | 19435.20      | 90 | 30 | 0  | 3.5 | 19435.20      |
| 0 | 30 | 0  | 3.6 | 14509.77      | 30 | 30 | 0  | 3.6 | 14509.77      | 60 | 30 | 0  | 3.6 | 14509.77      | 90 | 30 | 0  | 3.6 | 14509.77      |
| 0 | 30 | 0  | 3.7 | 10737.84      | 30 | 30 | 0  | 3.7 | 10737.84      | 60 | 30 | 0  | 3.7 | 10737.84      | 90 | 30 | 0  | 3.7 | 10737.84      |
| 0 | 30 | 0  | 3.8 | 7870.30       | 30 | 30 | 0  | 3.8 | 7870.30       | 60 | 30 | 0  | 3.8 | 7870.30       | 90 | 30 | 0  | 3.8 | 7870.30       |
| 0 | 30 | 0  | 3.9 | 5707.62       | 30 | 30 | 0  | 3.9 | 5707.62       | 60 | 30 | 0  | 3.9 | 5707.62       | 90 | 30 | 0  | 3.9 | 5707.62       |
| 0 | 30 | 0  | 4   | 4090.09       | 30 | 30 | 0  | 4   | 4090.09       | 60 | 30 | 0  | 4   | 4090.09       | 90 | 30 | 0  | 4   | 4090.09       |
| 0 | 30 | 0  | 4.1 | 2890.59       | 30 | 30 | 0  | 4.1 | 2890.59       | 60 | 30 | 0  | 4.1 | 2890.59       | 90 | 30 | 0  | 4.1 | 2890.59       |
| 0 | 30 | 0  | 4.2 | 2008.80       | 30 | 30 | 0  | 4.2 | 2008.80       | 60 | 30 | 0  | 4.2 | 2008.80       | 90 | 30 | 0  | 4.2 | 2008.80       |
| 0 | 30 | 0  | 4.3 | 1366.58       | 30 | 30 | 0  | 4.3 | 1366.58       | 60 | 30 | 0  | 4.3 | 1366.58       | 90 | 30 | 0  | 4.3 | 1366.58       |
| 0 | 30 | 0  | 4.4 | 903.57        | 30 | 30 | 0  | 4.4 | 903.57        | 60 | 30 | 0  | 4.4 | 903.57        | 90 | 30 | 0  | 4.4 | 903.57        |
| 0 | 30 | 0  | 4.5 | 573.67        | 30 | 30 | 0  | 4.5 | 573.67        | 60 | 30 | 0  | 4.5 | 573.67        | 90 | 30 | 0  | 4.5 | 573.67        |
| 0 | 30 | 0  | 4.6 | 341.79        | 30 | 30 | 0  | 4.6 | 341.79        | 60 | 30 | 0  | 4.6 | 341.79        | 90 | 30 | 0  | 4.6 | 341.79        |
| 0 | 30 | 0  | 4.7 | 181.46        | 30 | 30 | 0  | 4.7 | 181.46        | 60 | 30 | 0  | 4.7 | 181.46        | 90 | 30 | 0  | 4.7 | 181.46        |
| 0 | 30 | 0  | 4.8 | 72.83         | 30 | 30 | 0  | 4.8 | 72.83         | 60 | 30 | 0  | 4.8 | 72.83         | 90 | 30 | 0  | 4.8 | 72.83         |
| 0 | 30 | 0  | 4.9 | 1.17          | 30 | 30 | 0  | 4.9 | 1.17          | 60 | 30 | 0  | 4.9 | 1.17          | 90 | 30 | 0  | 4.9 | 1.17          |
| 0 | 30 | 0  | 5   | -44.39        | 30 | 30 | 0  | 5   | -44.39        | 60 | 30 | 0  | 5   | -44.39        | 90 | 30 | 0  | 5   | -44.39        |
| 0 | 30 | 0  | 5.1 | -71.71        | 30 | 30 | 0  | 5.1 | -71.71        | 60 | 30 | 0  | 5.1 | -71.71        | 90 | 30 | 0  | 5.1 | -71.71        |
| 0 | 30 | 0  | 5.2 | -86.48        | 30 | 30 | 0  | 5.2 | -86.48        | 60 | 30 | 0  | 5.2 | -86.48        | 90 | 30 | 0  | 5.2 | -86.48        |
| 0 | 30 | 0  | 5.3 | -92.78        | 30 | 30 | 0  | 5.3 | -92.78        | 60 | 30 | 0  | 5.3 | -92.78        | 90 | 30 | 0  | 5.3 | -92.78        |
| 0 | 30 | 0  | 5.4 | <b>-93.51</b> | 30 | 30 | 0  | 5.4 | <b>-93.51</b> | 60 | 30 | 0  | 5.4 | <b>-93.51</b> | 90 | 30 | 0  | 5.4 | <b>-93.51</b> |
| 0 | 30 | 0  | 5.5 | -90.74        | 30 | 30 | 0  | 5.5 | -90.74        | 60 | 30 | 0  | 5.5 | -90.74        | 90 | 30 | 0  | 5.5 | -90.74        |
| 0 | 30 | 0  | 5.6 | -85.90        | 30 | 30 | 0  | 5.6 | -85.90        | 60 | 30 | 0  | 5.6 | -85.90        | 90 | 30 | 0  | 5.6 | -85.90        |
| 0 | 30 | 0  | 5.7 | -79.96        | 30 | 30 | 0  | 5.7 | -79.96        | 60 | 30 | 0  | 5.7 | -79.96        | 90 | 30 | 0  | 5.7 | -79.96        |
| 0 | 30 | 0  | 5.8 | -73.56        | 30 | 30 | 0  | 5.8 | -73.56        | 60 | 30 | 0  | 5.8 | -73.56        | 90 | 30 | 0  | 5.8 | -73.56        |
| 0 | 30 | 0  | 5.9 | -67.12        | 30 | 30 | 0  | 5.9 | -67.12        | 60 | 30 | 0  | 5.9 | -67.12        | 90 | 30 | 0  | 5.9 | -67.12        |
| 0 | 30 | 0  | 6   | -60.89        | 30 | 30 | 0  | 6   | -60.89        | 60 | 30 | 0  | 6   | -60.89        | 90 | 30 | 0  | 6   | -60.89        |
| 0 | 30 | 0  | 6.5 | -36.02        | 30 | 30 | 0  | 6.5 | -36.02        | 60 | 30 | 0  | 6.5 | -36.02        | 90 | 30 | 0  | 6.5 | -36.02        |
| 0 | 30 | 0  | 7   | -21.41        | 30 | 30 | 0  | 7   | -21.41        | 60 | 30 | 0  | 7   | -21.41        | 90 | 30 | 0  | 7   | -21.41        |
| 0 | 30 | 0  | 7.5 | -13.24        | 30 | 30 | 0  | 7.5 | -13.24        | 60 | 30 | 0  | 7.5 | -13.24        | 90 | 30 | 0  | 7.5 | -13.24        |
| 0 | 30 | 0  | 8   | -8.55         | 30 | 30 | 0  | 8   | -8.55         | 60 | 30 | 0  | 8   | -8.55         | 90 | 30 | 0  | 8   | -8.55         |
| 0 | 30 | 0  | 8.5 | -5.74         | 30 | 30 | 0  | 8.5 | -5.74         | 60 | 30 | 0  | 8.5 | -5.74         | 90 | 30 | 0  | 8.5 | -5.74         |
| 0 | 30 | 0  | 9   | -3.99         | 30 | 30 | 0  | 9   | -3.99         | 60 | 30 | 0  | 9   | -3.99         | 90 | 30 | 0  | 9   | -3.99         |
| 0 | 30 | 0  | 9.5 | -2.84         | 30 | 30 | 0  | 9.5 | -2.84         | 60 | 30 | 0  | 9.5 | -2.84         | 90 | 30 | 0  | 9.5 | -2.84         |
| 0 | 30 | 0  | 10  | -2.07         | 30 | 30 | 0  | 10  | -2.07         | 60 | 30 | 0  | 10  | -2.07         | 90 | 30 | 0  | 10  | -2.07         |
| 0 | 30 | 0  | 12  | -0.68         | 30 | 30 | 0  | 12  | -0.68         | 60 | 30 | 0  | 12  | -0.68         | 90 | 30 | 0  | 12  | -0.68         |
| 0 | 30 | 0  | 15  | -0.16         | 30 | 30 | 0  | 15  | -0.16         | 60 | 30 | 0  | 15  | -0.16         | 90 | 30 | 0  | 15  | -0.16         |
| 0 | 30 | 0  | 20  | 0.00          | 30 | 30 | 0  | 20  | 0.00          | 60 | 30 | 0  | 20  | 0.00          | 90 | 30 | 0  | 20  | 0.00          |
| 0 | 30 | 10 | 2.5 | 130167.06     | 30 | 30 | 10 | 2.5 | 138006.51     | 60 | 30 | 10 | 2.5 | 163940.54     | 90 | 30 | 10 | 2.5 | 214875.42     |
| 0 | 30 | 10 | 2.6 | 102573.16     | 30 | 30 | 10 | 2.6 | 107676.15     | 60 | 30 | 10 | 2.6 | 123969.69     | 90 | 30 | 10 | 2.6 | 153939.98     |
| 0 | 30 | 10 | 2.7 | 84924.00      | 30 | 30 | 10 | 2.7 | 88125.99      | 60 | 30 | 10 | 2.7 | 97838.68      | 90 | 30 | 10 | 2.7 | 114381.16     |
| 0 | 30 | 10 | 2.8 | 75049.64      | 30 | 30 | 10 | 2.8 | 76579.76      | 60 | 30 | 10 | 2.8 | 80685.25      | 90 | 30 | 10 | 2.8 | 87635.81      |
| 0 | 30 | 10 | 2.9 | 52854.75      | 30 | 30 | 10 | 2.9 | 61406.69      | 60 | 30 | 10 | 2.9 | 66065.13      | 90 | 30 | 10 | 2.9 | 67262.67      |
| 0 | 30 | 10 | 3   | 42641.20      | 30 | 30 | 10 | 3   | 52889.55      | 60 | 30 | 10 | 3   | 52924.84      | 90 | 30 | 10 | 3   | 52977.42      |
| 0 | 30 | 10 | 3.1 | 33905.69      | 30 | 30 | 10 | 3.1 | 42600.34      | 60 | 30 | 10 | 3.1 | 42443.82      | 90 | 30 | 10 | 3.1 | 42184.53      |
| 0 | 30 | 10 | 3.2 | 26551.14      | 30 | 30 | 10 | 3.2 | 33856.18      | 60 | 30 | 10 | 3.2 | 33689.95      | 90 | 30 | 10 | 3.2 | 33419.59      |
| 0 | 30 | 10 | 3.3 | 26595.63      | 30 | 30 | 10 | 3.3 | 26509.17      | 60 | 30 | 10 | 3.3 | 26373.78      | 90 | 30 | 10 | 3.3 | 26155.82      |
| 0 | 30 | 10 | 3.4 | 20549.71      | 30 | 30 | 10 | 3.4 | 20517.82      | 60 | 30 | 10 | 3.4 | 20415.37      | 90 | 30 | 10 | 3.4 | 20249.48      |
| 0 | 30 | 10 | 3.5 | 15686.15      | 30 | 30 | 10 | 3.5 | 15660.66      | 60 | 30 | 10 | 3.5 | 15579.79      | 90 | 30 | 10 | 3.5 | 15449.41      |
| 0 | 30 | 10 | 3.6 | 11840.01      | 30 | 30 | 10 | 3.6 | 11818.84      | 60 | 30 | 10 | 3.6 | 11752.61      | 90 | 30 | 10 | 3.6 | 11646.70      |
| 0 | 30 | 10 | 3.7 | 8841.29       | 30 | 30 | 10 | 3.7 | 8823.07       | 60 | 30 | 10 | 3.7 | 8766.83       | 90 | 30 | 10 | 3.7 | 8678.00       |
| 0 | 30 | 10 | 3.8 | 6531.64       | 30 | 30 | 10 | 3.8 | 6515.53       | 60 | 30 | 10 | 3.8 | 6466.57       | 90 | 30 | 10 | 3.8 | 6390.22       |
| 0 | 30 | 10 | 3.9 | 4772.05       | 30 | 30 | 10 | 3.9 | 4757.59       | 60 | 30 | 10 | 3.9 | 4714.27       | 90 | 30 | 10 | 3.9 | 4647.58       |
| 0 | 30 | 10 | 4   | 3445.02       | 30 | 30 | 10 | 4   | 3431.94       | 60 | 30 | 10 | 4   | 3393.33       | 90 | 30 | 10 | 4   | 3334.59       |
| 0 | 30 | 10 | 4.1 | 2453.73       | 30 | 30 | 10 | 4.1 | 2441.94       | 60 | 30 | 10 | 4.1 | 2407.47       | 90 | 30 | 10 | 4.1 | 2355.55       |
| 0 | 30 | 10 | 4.2 | 1720.22       | 30 | 30 | 10 | 4.2 | 1709.61       | 60 | 30 | 10 | 4.2 | 1678.86       | 90 | 30 | 10 | 4.2 | 1632.94       |
| 0 | 30 | 10 | 4.3 | 1182.70       | 30 | 30 | 10 | 4.3 | 1173.19       | 60 | 30 | 10 | 4.3 | 1145.80       | 90 | 30 | 10 | 4.3 | 1105.21       |
| 0 | 30 | 10 | 4.4 | 792.85        | 30 | 30 | 10 | 4.4 | 784.35        | 60 | 30 | 10 | 4.4 | 760.03        | 90 | 30 | 10 | 4.4 | 724.22        |
| 0 | 30 | 10 | 4.5 | 513.29        | 30 | 30 | 10 | 4.5 | 505.73        | 60 | 30 | 10 | 4.5 | 484.20        | 90 | 30 | 10 | 4.5 | 452.66        |
| 0 | 30 | 10 | 4.6 | 315.37        | 30 | 30 | 10 | 4.6 | 308.67        | 60 | 30 | 10 | 4.6 | 289.66        | 90 | 30 | 10 | 4.6 | 261.95        |
| 0 | 30 | 10 | 4.7 | 177.33        | 30 | 30 | 10 | 4.7 | 171.41        | 60 | 30 | 10 | 4.7 | 154.68        | 90 | 30 | 10 | 4.7 | 130.38        |
| 0 | 30 | 10 | 4.8 | 82.80         | 30 | 30 | 10 | 4.8 | 77.59         | 60 | 30 | 10 | 4.8 | 62.88         | 90 | 30 | 10 | 4.8 | 41.61         |
| 0 | 30 | 10 | 4.9 | 19.58         | 30 | 30 | 10 | 4.9 | 14.99         | 60 | 30 | 10 | 4.9 | 2.09          | 90 | 30 | 10 | 4.9 | -16.53        |
| 0 | 30 | 10 | 5   | -21.34        | 30 | 30 | 10 | 5   | -25.38        | 60 | 30 | 10 | 5   | -36.70        | 90 | 30 | 10 | 5   | -52.99        |
| 0 | 30 | 10 | 5.1 | -46.56        | 30 | 30 | 10 | 5.1 | -50.11        | 60 | 30 | 10 | 5.1 | -60.06        | 90 | 30 | 10 | 5.1 | -74.32        |
| 0 | 30 | 10 | 5.2 | -60.90        | 30 | 30 | 10 | 5.2 | -64.02        | 60 | 30 | 10 | 5.2 | -72.76        | 90 | 30 | 10 | 5.2 | -85.26        |
| 0 | 30 | 10 | 5.3 | -67.83        | 30 | 30 | 10 | 5.3 | -70.58        | 60 | 30 | 10 | 5.3 | -78.25        | 90 | 30 | 10 | 5.3 | <b>-89.23</b> |
| 0 | 30 | 10 | 5.4 | <b>-69.86</b> | 30 | 30 | 10 | 5.4 | <b>-72.28</b> | 60 | 30 | 10 | 5.4 | <b>-79.03</b> | 90 | 30 | 10 | 5.4 | -88.67        |
| 0 | 30 | 10 | 5.5 | -68.74        | 30 | 30 | 10 | 5.5 | -70.87        | 60 | 30 | 10 | 5.5 | -76.82        | 90 | 30 | 10 | 5.5 | -85.29        |
| 0 | 30 | 10 | 5.6 | -65.70        | 30 | 30 | 10 | 5.6 | -67.59        | 60 | 30 | 10 | 5.6 | -72.83        | 90 | 30 | 10 | 5.6 | -80.30        |
| 0 | 30 | 10 | 5.7 | -61.58        | 30 | 30 | 10 | 5.7 | -63.25        | 60 | 30 | 10 | 5.7 | -67.88        | 90 | 30 | 10 | 5.7 | -74.48        |
| 0 | 30 | 10 | 5.8 | -56.94        | 30 | 30 | 10 | 5.8 | -58.41        | 60 | 30 | 10 | 5.8 | -62.52        | 90 | 30 | 10 | 5.8 | -68.36        |
| 0 | 30 | 10 | 5.9 | -52.14        | 30 | 30 | 10 | 5.9 | -53.45        | 60 | 30 | 10 | 5.9 | -57.10        | 90 | 30 | 10 | 5.9 | -62.28        |
| 0 | 30 | 10 | 6   | -47.42        | 30 | 30 | 10 | 6   | -48.58        | 60 | 30 | 10 | 6   | -51.83        | 90 | 30 | 10 | 6   | -56.45        |
| 0 | 30 | 10 | 6.5 | -28.19        | 30 | 30 | 10 | 6.5 | -28.87        | 60 | 30 | 10 | 6.5 | -30.76        | 90 | 30 | 10 | 6.5 | -33.43        |
| 0 | 30 | 10 | 7   | -16.73        | 30 | 30 | 10 | 7   | -17.15        | 60 | 30 | 10 | 7   | -18.31        | 90 | 30 | 10 | 7   | -19.94        |
| 0 | 30 | 10 | 7.5 | -10.32        | 30 | 30 | 10 | 7.5 | -10.59        | 60 | 30 | 10 | 7.5 | -             |    |    |    |     |               |

|   |    |    |     |          |    |    |    |     |          |    |    |    |     |          |    |    |    |     |          |
|---|----|----|-----|----------|----|----|----|-----|----------|----|----|----|-----|----------|----|----|----|-----|----------|
| 0 | 30 | 20 | 3.5 | 8696.13  | 30 | 30 | 20 | 3.5 | 8685.98  | 60 | 30 | 20 | 3.5 | 8643.61  | 90 | 30 | 20 | 3.5 | 8546.18  |
| 0 | 30 | 20 | 3.6 | 6629.79  | 30 | 30 | 20 | 3.6 | 6618.38  | 60 | 30 | 20 | 3.6 | 6575.68  | 90 | 30 | 20 | 3.6 | 6486.06  |
| 0 | 30 | 20 | 3.7 | 4992.61  | 30 | 30 | 20 | 3.7 | 4980.39  | 60 | 30 | 20 | 3.7 | 4937.79  | 90 | 30 | 20 | 3.7 | 4854.60  |
| 0 | 30 | 20 | 3.8 | 3713.98  | 30 | 30 | 20 | 3.8 | 3701.36  | 60 | 30 | 20 | 3.8 | 3659.36  | 90 | 30 | 20 | 3.8 | 3581.84  |
| 0 | 30 | 20 | 3.9 | 2728.17  | 30 | 30 | 20 | 3.9 | 2715.49  | 60 | 30 | 20 | 3.9 | 2674.68  | 90 | 30 | 20 | 3.9 | 2602.54  |
| 0 | 30 | 20 | 4   | 1977.02  | 30 | 30 | 20 | 4   | 1964.59  | 60 | 30 | 20 | 4   | 1925.52  | 90 | 30 | 20 | 4   | 1858.73  |
| 0 | 30 | 20 | 4.1 | 1411.01  | 30 | 30 | 20 | 4.1 | 1399.08  | 60 | 30 | 20 | 4.1 | 1362.21  | 90 | 30 | 20 | 4.1 | 1300.77  |
| 0 | 30 | 20 | 4.2 | 989.14   | 30 | 30 | 20 | 4.2 | 977.87   | 60 | 30 | 20 | 4.2 | 943.52   | 90 | 30 | 20 | 4.2 | 887.43   |
| 0 | 30 | 20 | 4.3 | 678.16   | 30 | 30 | 20 | 4.3 | 667.66   | 60 | 30 | 20 | 4.3 | 636.01   | 90 | 30 | 20 | 4.3 | 585.16   |
| 0 | 30 | 20 | 4.4 | 451.58   | 30 | 30 | 20 | 4.4 | 441.91   | 60 | 30 | 20 | 4.4 | 413.01   | 90 | 30 | 20 | 4.4 | 367.19   |
| 0 | 30 | 20 | 4.5 | 288.58   | 30 | 30 | 20 | 4.5 | 279.76   | 60 | 30 | 20 | 4.5 | 253.56   | 90 | 30 | 20 | 4.5 | 212.48   |
| 0 | 30 | 20 | 4.6 | 173.01   | 30 | 30 | 20 | 4.6 | 165.00   | 60 | 30 | 20 | 4.6 | 141.37   | 90 | 30 | 20 | 4.6 | 104.69   |
| 0 | 30 | 20 | 4.7 | 92.43    | 30 | 30 | 20 | 4.7 | 85.21    | 60 | 30 | 20 | 4.7 | 64.00    | 90 | 30 | 20 | 4.7 | 31.33    |
| 0 | 30 | 20 | 4.8 | 37.41    | 30 | 30 | 20 | 4.8 | 30.93    | 60 | 30 | 20 | 4.8 | 11.96    | 90 | 30 | 20 | 4.8 | -17.07   |
| 0 | 30 | 20 | 4.9 | 0.85     | 30 | 30 | 20 | 4.9 | -4.95    | 60 | 30 | 20 | 4.9 | -21.87   | 90 | 30 | 20 | 4.9 | -47.62   |
| 0 | 30 | 20 | 5   | -22.57   | 30 | 30 | 20 | 5   | -27.74   | 60 | 30 | 20 | 5   | -42.78   | 90 | 30 | 20 | 5   | -65.59   |
| 0 | 30 | 20 | 5.1 | -36.74   | 30 | 30 | 20 | 5.1 | -41.34   | 60 | 30 | 20 | 5.1 | -54.69   | 90 | 30 | 20 | 5.1 | -74.88   |
| 0 | 30 | 20 | 5.2 | -44.51   | 30 | 30 | 20 | 5.2 | -48.60   | 60 | 30 | 20 | 5.2 | -60.45   | 90 | 30 | 20 | 5.2 | -78.30   |
| 0 | 30 | 20 | 5.3 | -47.95   | 30 | 30 | 20 | 5.3 | -51.57   | 60 | 30 | 20 | 5.3 | -62.08   | 90 | 30 | 20 | 5.3 | -77.88   |
| 0 | 30 | 20 | 5.4 | -48.48   | 30 | 30 | 20 | 5.4 | -51.71   | 60 | 30 | 20 | 5.4 | -61.05   | 90 | 30 | 20 | 5.4 | -75.04   |
| 0 | 30 | 20 | 5.5 | -47.17   | 30 | 30 | 20 | 5.5 | -50.05   | 60 | 30 | 20 | 5.5 | -58.36   | 90 | 30 | 20 | 5.5 | -70.77   |
| 0 | 30 | 20 | 5.6 | -44.74   | 30 | 30 | 20 | 5.6 | -47.31   | 60 | 30 | 20 | 5.6 | -54.73   | 90 | 30 | 20 | 5.6 | -65.76   |
| 0 | 30 | 20 | 5.7 | -41.70   | 30 | 30 | 20 | 5.7 | -44.00   | 60 | 30 | 20 | 5.7 | -50.63   | 90 | 30 | 20 | 5.7 | -60.46   |
| 0 | 30 | 20 | 5.8 | -38.40   | 30 | 30 | 20 | 5.8 | -40.46   | 60 | 30 | 20 | 5.8 | -46.39   | 90 | 30 | 20 | 5.8 | -55.16   |
| 0 | 30 | 20 | 5.9 | -35.05   | 30 | 30 | 20 | 5.9 | -36.90   | 60 | 30 | 20 | 5.9 | -42.22   | 90 | 30 | 20 | 5.9 | -50.07   |
| 0 | 30 | 20 | 6   | -31.79   | 30 | 30 | 20 | 6   | -33.46   | 60 | 30 | 20 | 6   | -38.24   | 90 | 30 | 20 | 6   | -45.28   |
| 0 | 30 | 20 | 6.5 | -18.76   | 30 | 30 | 20 | 6.5 | -19.78   | 60 | 30 | 20 | 6.5 | -22.66   | 90 | 30 | 20 | 6.5 | -26.87   |
| 0 | 30 | 20 | 7   | -11.09   | 30 | 30 | 20 | 7   | -11.74   | 60 | 30 | 20 | 7   | -13.56   | 90 | 30 | 20 | 7   | -16.20   |
| 0 | 30 | 20 | 7.5 | -6.82    | 30 | 30 | 20 | 7.5 | -7.24    | 60 | 30 | 20 | 7.5 | -8.44    | 90 | 30 | 20 | 7.5 | -10.17   |
| 0 | 30 | 20 | 8   | -4.38    | 30 | 30 | 20 | 8   | -4.67    | 60 | 30 | 20 | 8   | -5.48    | 90 | 30 | 20 | 8   | -6.66    |
| 0 | 30 | 20 | 8.5 | -2.93    | 30 | 30 | 20 | 8.5 | -3.13    | 60 | 30 | 20 | 8.5 | -3.70    | 90 | 30 | 20 | 8.5 | -4.52    |
| 0 | 30 | 20 | 9   | -2.02    | 30 | 30 | 20 | 9   | -2.17    | 60 | 30 | 20 | 9   | -2.58    | 90 | 30 | 20 | 9   | -3.16    |
| 0 | 30 | 20 | 9.5 | -1.43    | 30 | 30 | 20 | 9.5 | -1.54    | 60 | 30 | 20 | 9.5 | -1.84    | 90 | 30 | 20 | 9.5 | -2.27    |
| 0 | 30 | 20 | 10  | -1.04    | 30 | 30 | 20 | 10  | -1.12    | 60 | 30 | 20 | 10  | -1.34    | 90 | 30 | 20 | 10  | -1.66    |
| 0 | 30 | 20 | 12  | -0.34    | 30 | 30 | 20 | 12  | -0.36    | 60 | 30 | 20 | 12  | -0.44    | 90 | 30 | 20 | 12  | -0.56    |
| 0 | 30 | 20 | 15  | -0.08    | 30 | 30 | 20 | 15  | -0.09    | 60 | 30 | 20 | 15  | -0.11    | 90 | 30 | 20 | 15  | -0.13    |
| 0 | 30 | 20 | 20  | 0.00     | 30 | 30 | 20 | 20  | 0.00     | 60 | 30 | 20 | 20  | 0.00     | 90 | 30 | 20 | 20  | 0.00     |
| 0 | 30 | 30 | 2.5 | 27639.65 | 30 | 30 | 30 | 2.5 | 28048.14 | 60 | 30 | 30 | 2.5 | 29319.89 | 90 | 30 | 30 | 2.5 | 31629.43 |
| 0 | 30 | 30 | 2.6 | 24161.11 | 30 | 30 | 30 | 2.6 | 24467.67 | 60 | 30 | 30 | 2.6 | 25323.87 | 90 | 30 | 30 | 2.6 | 26819.06 |
| 0 | 30 | 30 | 2.7 | 20800.88 | 30 | 30 | 30 | 2.7 | 21019.22 | 60 | 30 | 30 | 2.7 | 21626.98 | 90 | 30 | 30 | 2.7 | 22510.92 |
| 0 | 30 | 30 | 2.8 | 17637.97 | 30 | 30 | 30 | 2.8 | 17789.43 | 60 | 30 | 30 | 2.8 | 18191.07 | 90 | 30 | 30 | 2.8 | 18744.93 |
| 0 | 30 | 30 | 2.9 | 14725.50 | 30 | 30 | 30 | 2.9 | 14829.49 | 60 | 30 | 30 | 2.9 | 15092.59 | 90 | 30 | 30 | 2.9 | 15416.46 |
| 0 | 30 | 30 | 3   | 12107.90 | 30 | 30 | 30 | 3   | 12179.02 | 60 | 30 | 30 | 3   | 12350.73 | 90 | 30 | 30 | 3   | 12535.69 |
| 0 | 30 | 30 | 3.1 | 9810.41  | 30 | 30 | 30 | 3.1 | 9858.76  | 60 | 30 | 30 | 3.1 | 9969.63  | 90 | 30 | 30 | 3.1 | 10070.22 |
| 0 | 30 | 30 | 3.2 | 7838.06  | 30 | 30 | 30 | 3.2 | 7870.29  | 60 | 30 | 30 | 3.2 | 7939.59  | 90 | 30 | 30 | 3.2 | 7987.42  |
| 0 | 30 | 30 | 3.3 | 6178.69  | 30 | 30 | 30 | 3.3 | 6199.28  | 60 | 30 | 30 | 3.3 | 6239.34  | 90 | 30 | 30 | 3.3 | 6252.85  |
| 0 | 30 | 30 | 3.4 | 4807.98  | 30 | 30 | 30 | 3.4 | 4820.05  | 60 | 30 | 30 | 3.4 | 4839.14  | 90 | 30 | 30 | 3.4 | 4829.61  |
| 0 | 30 | 30 | 3.5 | 3694.28  | 30 | 30 | 30 | 3.5 | 3700.11  | 60 | 30 | 30 | 3.5 | 3704.10  | 90 | 30 | 30 | 3.5 | 3678.92  |
| 0 | 30 | 30 | 3.6 | 2803.03  | 30 | 30 | 30 | 3.6 | 2804.32  | 60 | 30 | 30 | 3.6 | 2797.51  | 90 | 30 | 30 | 3.6 | 2761.93  |
| 0 | 30 | 30 | 3.7 | 2099.62  | 30 | 30 | 30 | 3.7 | 2097.66  | 60 | 30 | 30 | 3.7 | 2083.35  | 90 | 30 | 30 | 3.7 | 2041.29  |
| 0 | 30 | 30 | 3.8 | 1551.56  | 30 | 30 | 30 | 3.8 | 1547.35  | 60 | 30 | 30 | 3.8 | 1528.09  | 90 | 30 | 30 | 3.8 | 1482.55  |
| 0 | 30 | 30 | 3.9 | 1129.70  | 30 | 30 | 30 | 3.9 | 1124.01  | 60 | 30 | 30 | 3.9 | 1101.79  | 90 | 30 | 30 | 3.9 | 1055.02  |
| 0 | 30 | 30 | 4   | 808.75   | 30 | 30 | 30 | 4   | 802.18   | 60 | 30 | 30 | 4   | 778.50   | 90 | 30 | 30 | 4   | 732.16   |
| 0 | 30 | 30 | 4.1 | 567.43   | 30 | 30 | 30 | 4.1 | 560.41   | 60 | 30 | 30 | 4.1 | 536.37   | 90 | 30 | 30 | 4.1 | 491.62   |
| 0 | 30 | 30 | 4.2 | 388.15   | 30 | 30 | 30 | 4.2 | 381.02   | 60 | 30 | 30 | 4.2 | 357.38   | 90 | 30 | 30 | 4.2 | 314.98   |
| 0 | 30 | 30 | 4.3 | 256.71   | 30 | 30 | 30 | 4.3 | 249.68   | 60 | 30 | 30 | 4.3 | 226.96   | 90 | 30 | 30 | 4.3 | 187.34   |
| 0 | 30 | 30 | 4.4 | 161.73   | 30 | 30 | 30 | 4.4 | 154.96   | 60 | 30 | 30 | 4.4 | 133.48   | 90 | 30 | 30 | 4.4 | 96.84    |
| 0 | 30 | 30 | 4.5 | 94.21    | 30 | 30 | 30 | 4.5 | 87.81    | 60 | 30 | 30 | 4.5 | 67.76    | 90 | 30 | 30 | 4.5 | 34.16    |
| 0 | 30 | 30 | 4.6 | 47.10    | 30 | 30 | 30 | 4.6 | 41.14    | 60 | 30 | 30 | 4.6 | 22.63    | 90 | 30 | 30 | 4.6 | -7.99    |
| 0 | 30 | 30 | 4.7 | 14.96    | 30 | 30 | 30 | 4.7 | 9.47     | 60 | 30 | 30 | 4.7 | -7.46    | 90 | 30 | 30 | 4.7 | -35.21   |
| 0 | 30 | 30 | 4.8 | -6.34    | 30 | 30 | 30 | 4.8 | -11.36   | 60 | 30 | 30 | 4.8 | -26.75   | 90 | 30 | 30 | 4.8 | -51.77   |
| 0 | 30 | 30 | 4.9 | -19.87   | 30 | 30 | 30 | 4.9 | -24.44   | 60 | 30 | 30 | 4.9 | -38.36   | 90 | 30 | 30 | 4.9 | -60.84   |
| 0 | 30 | 30 | 5   | -27.90   | 30 | 30 | 30 | 5   | -32.04   | 60 | 30 | 30 | 5   | -44.61   | 90 | 30 | 30 | 5   | -64.77   |
| 0 | 30 | 30 | 5.1 | -32.09   | 30 | 30 | 30 | 5.1 | -35.83   | 60 | 30 | 30 | 5.1 | -47.17   | 90 | 30 | 30 | 5.1 | -65.23   |
| 0 | 30 | 30 | 5.2 | -33.64   | 30 | 30 | 30 | 5.2 | -37.03   | 60 | 30 | 30 | 5.2 | -47.25   | 90 | 30 | 30 | 5.2 | -63.45   |
| 0 | 30 | 30 | 5.3 | -33.44   | 30 | 30 | 30 | 5.3 | -36.52   | 60 | 30 | 30 | 5.3 | -45.74   | 90 | 30 | 30 | 5.3 | -60.28   |
| 0 | 30 | 30 | 5.4 | -32.14   | 30 | 30 | 30 | 5.4 | -34.93   | 60 | 30 | 30 | 5.4 | -43.27   | 90 | 30 | 30 | 5.4 | -56.33   |
| 0 | 30 | 30 | 5.5 | -30.20   | 30 | 30 | 30 | 5.5 | -32.73   | 60 | 30 | 30 | 5.5 | -40.27   | 90 | 30 | 30 | 5.5 | -52.02   |
| 0 | 30 | 30 | 5.6 | -27.93   | 30 | 30 | 30 | 5.6 | -30.23   | 60 | 30 | 30 | 5.6 | -37.05   | 90 | 30 | 30 | 5.6 | -47.63   |
| 0 | 30 | 30 | 5.7 | -25.53   | 30 | 30 | 30 | 5.7 | -27.62   | 60 | 30 | 30 | 5.7 | -33.80   | 90 | 30 | 30 | 5.7 | -43.35   |
| 0 | 30 | 30 | 5.8 | -23.15   | 30 | 30 | 30 | 5.8 | -25.05   | 60 | 30 | 30 | 5.8 | -30.66   | 90 | 30 | 30 | 5.8 | -39.29   |
| 0 | 30 | 30 | 5.9 | -20.87   | 30 | 30 | 30 | 5.9 | -22.60   | 60 | 30 | 30 | 5.9 | -27.69   | 90 | 30 | 30 | 5.9 | -35.50   |
| 0 | 30 | 30 | 6   | -18.74   | 30 | 30 | 30 | 6   | -20.31   | 60 | 30 | 30 | 6   | -24.94   | 90 | 30 | 30 | 6   | -32.01   |
| 0 | 30 | 30 | 6.5 | -10.69   | 30 | 30 | 30 | 6.5 | -11.70   | 60 | 30 | 30 | 6.5 | -14.62   | 90 | 30 | 30 | 6.5 | -19.04   |
| 0 | 30 | 30 | 7   | -6.18    | 30 | 30 | 30 | 7   | -6.84    | 60 | 30 | 30 | 7   | -8.76    | 90 | 30 | 30 | 7   | -11.64   |
| 0 | 30 | 30 | 7.5 | -3.72    | 30 | 30 | 30 | 7.5 | -4.17    | 60 | 30 | 30 | 7.5 | -5.47    | 90 | 30 | 30 | 7.5 | -7.41    |
| 0 | 30 | 30 | 8   | -2.34    | 30 | 30 | 30 | 8   | -2.66    | 60 | 30 | 30 | 8</ |          |    |    |    |     |          |

|   |    |    |     |         |    |    |    |     |         |    |    |    |     |         |      |    |    |     |         |
|---|----|----|-----|---------|----|----|----|-----|---------|----|----|----|-----|---------|------|----|----|-----|---------|
| 0 | 30 | 40 | 3.6 | 945.51  | 30 | 30 | 40 | 3.6 | 948.33  | 60 | 30 | 40 | 3.6 | 949.96  | 90   | 30 | 40 | 3.6 | 936.88  |
| 0 | 30 | 40 | 3.7 | 685.54  | 30 | 30 | 40 | 3.7 | 686.03  | 60 | 30 | 40 | 3.7 | 681.75  | 90   | 30 | 40 | 3.7 | 661.88  |
| 0 | 30 | 40 | 3.8 | 487.81  | 30 | 30 | 40 | 3.8 | 486.61  | 60 | 30 | 40 | 3.8 | 478.27  | 90   | 30 | 40 | 3.8 | 454.20  |
| 0 | 30 | 40 | 3.9 | 339.14  | 30 | 30 | 40 | 3.9 | 336.77  | 60 | 30 | 40 | 3.9 | 325.78  | 90   | 30 | 40 | 3.9 | 299.43  |
| 0 | 30 | 40 | 4   | 228.71  | 30 | 30 | 40 | 4   | 225.58  | 60 | 30 | 40 | 4   | 212.99  | 90   | 30 | 40 | 4   | 185.75  |
| 0 | 30 | 40 | 4.1 | 147.77  | 30 | 30 | 40 | 4.1 | 144.18  | 60 | 30 | 40 | 4.1 | 130.78  | 90   | 30 | 40 | 4.1 | 103.63  |
| 0 | 30 | 40 | 4.2 | 89.35   | 30 | 30 | 40 | 4.2 | 85.51   | 60 | 30 | 40 | 4.2 | 71.89   | 90   | 30 | 40 | 4.2 | 45.51   |
| 0 | 30 | 40 | 4.3 | 47.95   | 30 | 30 | 40 | 4.3 | 44.04   | 60 | 30 | 40 | 4.3 | 30.60   | 90   | 30 | 40 | 4.3 | 5.43    |
| 0 | 30 | 40 | 4.4 | 19.28   | 30 | 30 | 40 | 4.4 | 15.42   | 60 | 30 | 40 | 4.4 | 2.44    | 90   | 30 | 40 | 4.4 | -21.27  |
| 0 | 30 | 40 | 4.5 | -0.02   | 30 | 30 | 40 | 4.5 | -3.74   | 60 | 30 | 40 | 4.5 | -16.08  | 90   | 30 | 40 | 4.5 | -38.19  |
| 0 | 30 | 40 | 4.6 | -12.49  | 30 | 30 | 40 | 4.6 | -16.04  | 60 | 30 | 40 | 4.6 | -27.63  | 90   | 30 | 40 | 4.6 | -48.08  |
| 0 | 30 | 40 | 4.7 | -20.09  | 30 | 30 | 40 | 4.7 | -23.43  | 60 | 30 | 40 | 4.7 | -34.23  | 90   | 30 | 40 | 4.7 | -53.03  |
| 0 | 30 | 40 | 4.8 | -24.25  | 30 | 30 | 40 | 4.8 | -27.37  | 60 | 30 | 40 | 4.8 | -37.37  | 90   | 30 | 40 | 4.8 | -54.58  |
| 0 | 30 | 40 | 4.9 | -26.01  | 30 | 30 | 40 | 4.9 | -28.92  | 60 | 30 | 40 | 4.9 | -38.15  | 90   | 30 | 40 | 4.9 | -53.86  |
| 0 | 30 | 40 | 5   | -26.18  | 30 | 30 | 40 | 5   | -28.87  | 60 | 30 | 40 | 5   | -37.37  | 90   | 30 | 40 | 5   | -51.70  |
| 0 | 30 | 40 | 5.1 | -25.32  | 30 | 30 | 40 | 5.1 | -27.81  | 60 | 30 | 40 | 5.1 | -35.61  | 90   | 30 | 40 | 5.1 | -48.67  |
| 0 | 30 | 40 | 5.2 | -23.83  | 30 | 30 | 40 | 5.2 | -26.13  | 60 | 30 | 40 | 5.2 | -33.29  | 90   | 30 | 40 | 5.2 | -45.19  |
| 0 | 30 | 40 | 5.3 | -22.00  | 30 | 30 | 40 | 5.3 | -24.12  | 60 | 30 | 40 | 5.3 | -30.70  | 90   | 30 | 40 | 5.3 | -41.54  |
| 0 | 30 | 40 | 5.4 | -20.03  | 30 | 30 | 40 | 5.4 | -21.99  | 60 | 30 | 40 | 5.4 | -28.02  | 90   | 30 | 40 | 5.4 | -37.91  |
| 0 | 30 | 40 | 5.5 | -18.05  | 30 | 30 | 40 | 5.5 | -19.86  | 60 | 30 | 40 | 5.5 | -25.39  | 90   | 30 | 40 | 5.5 | -34.40  |
| 0 | 30 | 40 | 5.6 | -16.14  | 30 | 30 | 40 | 5.6 | -17.80  | 60 | 30 | 40 | 5.6 | -22.89  | 90   | 30 | 40 | 5.6 | -31.11  |
| 0 | 30 | 40 | 5.7 | -14.34  | 30 | 30 | 40 | 5.7 | -15.88  | 60 | 30 | 40 | 5.7 | -20.55  | 90   | 30 | 40 | 5.7 | -28.06  |
| 0 | 30 | 40 | 5.8 | -12.70  | 30 | 30 | 40 | 5.8 | -14.11  | 60 | 30 | 40 | 5.8 | -18.40  | 90   | 30 | 40 | 5.8 | -25.26  |
| 0 | 30 | 40 | 5.9 | -11.20  | 30 | 30 | 40 | 5.9 | -12.51  | 60 | 30 | 40 | 5.9 | -16.45  | 90   | 30 | 40 | 5.9 | -22.73  |
| 0 | 30 | 40 | 6   | -9.87   | 30 | 30 | 40 | 6   | -11.07  | 60 | 30 | 40 | 6   | -14.69  | 90   | 30 | 40 | 6   | -20.44  |
| 0 | 30 | 40 | 6.5 | -5.17   | 30 | 30 | 40 | 6.5 | -5.98   | 60 | 30 | 40 | 6.5 | -8.39   | 90   | 30 | 40 | 6.5 | -12.17  |
| 0 | 30 | 40 | 7   | -2.74   | 30 | 30 | 40 | 7   | -3.30   | 60 | 30 | 40 | 7   | -4.95   | 90   | 30 | 40 | 7   | -7.50   |
| 0 | 30 | 40 | 7.5 | -1.50   | 30 | 30 | 40 | 7.5 | -1.89   | 60 | 30 | 40 | 7.5 | -3.05   | 90   | 30 | 40 | 7.5 | -4.82   |
| 0 | 30 | 40 | 8   | -0.84   | 30 | 30 | 40 | 8   | -1.13   | 60 | 30 | 40 | 8   | -1.96   | 90   | 30 | 40 | 8   | -3.22   |
| 0 | 30 | 40 | 8.5 | -0.49   | 30 | 30 | 40 | 8.5 | -0.70   | 60 | 30 | 40 | 8.5 | -1.30   | 90   | 30 | 40 | 8.5 | -2.22   |
| 0 | 30 | 40 | 9   | -0.29   | 30 | 30 | 40 | 9   | -0.44   | 60 | 30 | 40 | 9   | -0.89   | 90   | 30 | 40 | 9   | -1.57   |
| 0 | 30 | 40 | 9.5 | -0.17   | 30 | 30 | 40 | 9.5 | -0.29   | 60 | 30 | 40 | 9.5 | -0.63   | 90   | 30 | 40 | 9.5 | -1.13   |
| 0 | 30 | 40 | 10  | -0.09   | 30 | 30 | 40 | 10  | -0.19   | 60 | 30 | 40 | 10  | -0.45   | 90   | 30 | 40 | 10  | -0.84   |
| 0 | 30 | 40 | 12  | 0.00    | 30 | 30 | 40 | 12  | -0.04   | 60 | 30 | 40 | 12  | -0.14   | 90   | 30 | 40 | 12  | -0.28   |
| 0 | 30 | 40 | 15  | 0.01    | 30 | 30 | 40 | 15  | 0.00    | 60 | 30 | 40 | 15  | -0.03   | 90   | 30 | 40 | 15  | -0.07   |
| 0 | 30 | 40 | 20  | 0.00    | 30 | 30 | 40 | 20  | 0.00    | 60 | 30 | 40 | 20  | 0.00    | 90   | 30 | 40 | 20  | 0.00    |
| 0 | 30 | 50 | 2.5 | 7619.26 | 30 | 30 | 50 | 2.5 | 7670.17 | 60 | 30 | 50 | 2.5 | 7835.18 | 90   | 30 | 50 | 2.5 | 8133.29 |
| 0 | 30 | 50 | 2.6 | 5835.44 | 30 | 30 | 50 | 2.6 | 5880.03 | 60 | 30 | 50 | 2.6 | 6018.40 | 90   | 30 | 50 | 2.6 | 6253.76 |
| 0 | 30 | 50 | 2.7 | 4446.80 | 30 | 30 | 50 | 2.7 | 4484.42 | 60 | 30 | 50 | 2.7 | 4596.81 | 90   | 30 | 50 | 2.7 | 4777.79 |
| 0 | 30 | 50 | 2.8 | 3368.76 | 30 | 30 | 50 | 2.8 | 3399.45 | 60 | 30 | 50 | 2.8 | 3488.15 | 90   | 30 | 50 | 2.8 | 3623.51 |
| 0 | 30 | 50 | 2.9 | 2534.49 | 30 | 30 | 50 | 2.9 | 2558.85 | 60 | 30 | 50 | 2.9 | 2626.92 | 90   | 30 | 50 | 2.9 | 2724.96 |
| 0 | 30 | 50 | 3   | 1891.39 | 30 | 30 | 50 | 3   | 1910.21 | 60 | 30 | 50 | 3   | 1960.89 | 90   | 30 | 50 | 3   | 2029.06 |
| 0 | 30 | 50 | 3.1 | 1397.93 | 30 | 30 | 50 | 3.1 | 1412.06 | 60 | 30 | 50 | 3.1 | 1448.47 | 90   | 30 | 50 | 3.1 | 1493.24 |
| 0 | 30 | 50 | 3.2 | 1021.34 | 30 | 30 | 50 | 3.2 | 1031.60 | 60 | 30 | 50 | 3.2 | 1056.56 | 90   | 30 | 50 | 3.2 | 1083.35 |
| 0 | 30 | 50 | 3.3 | 735.75  | 30 | 30 | 50 | 3.3 | 742.88  | 60 | 30 | 50 | 3.3 | 758.85  | 90   | 30 | 50 | 3.3 | 772.09  |
| 0 | 30 | 50 | 3.4 | 520.78  | 30 | 30 | 50 | 3.4 | 525.44  | 60 | 30 | 50 | 3.4 | 534.48  | 90   | 30 | 50 | 3.4 | 537.73  |
| 0 | 30 | 50 | 3.5 | 360.42  | 30 | 30 | 50 | 3.5 | 363.16  | 60 | 30 | 50 | 3.5 | 366.97  | 90   | 30 | 50 | 3.5 | 363.03  |
| 0 | 30 | 50 | 3.6 | 242.09  | 30 | 30 | 50 | 3.6 | 243.38  | 60 | 30 | 50 | 3.6 | 243.31  | 90   | 30 | 50 | 3.6 | 234.35  |
| 0 | 30 | 50 | 3.7 | 155.92  | 30 | 30 | 50 | 3.7 | 156.11  | 60 | 30 | 50 | 3.7 | 153.24  | 90   | 30 | 50 | 3.7 | 140.91  |
| 0 | 30 | 50 | 3.8 | 94.12   | 30 | 30 | 50 | 3.8 | 93.50   | 60 | 30 | 50 | 3.8 | 88.65   | 90   | 30 | 50 | 3.8 | 74.20   |
| 0 | 30 | 50 | 3.9 | 50.55   | 30 | 30 | 50 | 3.9 | 49.35   | 60 | 30 | 50 | 3.9 | 43.15   | 90   | 30 | 50 | 3.9 | 27.55   |
| 0 | 30 | 50 | 4   | 20.46   | 30 | 30 | 50 | 4   | 18.85   | 60 | 30 | 50 | 4   | 11.83   | 90   | 30 | 50 | 4   | -4.22   |
| 0 | 30 | 50 | 4.1 | 0.24    | 30 | 30 | 50 | 4.1 | -1.62   | 60 | 30 | 50 | 4.1 | -9.08   | 90   | 30 | 50 | 4.1 | -25.07  |
| 0 | 30 | 50 | 4.2 | -12.79  | 30 | 30 | 50 | 4.2 | -14.79  | 60 | 30 | 50 | 4.2 | -22.40  | 90   | 30 | 50 | 4.2 | -37.99  |
| 0 | 30 | 50 | 4.3 | -20.65  | 30 | 30 | 50 | 4.3 | -22.72  | 60 | 30 | 50 | 4.3 | -30.26  | 90   | 30 | 50 | 4.3 | -45.23  |
| 0 | 30 | 50 | 4.4 | -24.88  | 30 | 30 | 50 | 4.4 | -26.94  | 60 | 30 | 50 | 4.4 | -34.28  | 90   | 30 | 50 | 4.4 | -48.49  |
| 0 | 30 | 50 | 4.5 | -26.58  | 30 | 30 | 50 | 4.5 | -28.61  | 60 | 30 | 50 | 4.5 | -35.66  | 90   | 30 | 50 | 4.5 | -49.03  |
| 0 | 30 | 50 | 4.6 | -26.62  | 30 | 30 | 50 | 4.6 | -28.58  | 60 | 30 | 50 | 4.6 | -35.29  | 90   | 30 | 50 | 4.6 | -47.78  |
| 0 | 30 | 50 | 4.7 | -25.58  | 30 | 30 | 50 | 4.7 | -27.45  | 60 | 30 | 50 | 4.7 | -33.79  | 90   | 30 | 50 | 4.7 | -45.42  |
| 0 | 30 | 50 | 4.8 | -23.90  | 30 | 30 | 50 | 4.8 | -25.69  | 60 | 30 | 50 | 4.8 | -31.64  | 90   | 30 | 50 | 4.8 | -42.42  |
| 0 | 30 | 50 | 4.9 | -21.89  | 30 | 30 | 50 | 4.9 | -23.57  | 60 | 30 | 50 | 4.9 | -29.14  | 90   | 30 | 50 | 4.9 | -39.11  |
| 0 | 30 | 50 | 5   | -19.73  | 30 | 30 | 50 | 5   | -21.32  | 60 | 30 | 50 | 5   | -26.52  | 90   | 30 | 50 | 5   | -35.73  |
| 0 | 30 | 50 | 5.1 | -17.58  | 30 | 30 | 50 | 5.1 | -19.07  | 60 | 30 | 50 | 5.1 | -23.91  | 90   | 30 | 50 | 5.1 | -32.41  |
| 0 | 30 | 50 | 5.2 | -15.51  | 30 | 30 | 50 | 5.2 | -16.91  | 60 | 30 | 50 | 5.2 | -21.42  | 90   | 30 | 50 | 5.2 | -29.25  |
| 0 | 30 | 50 | 5.3 | -13.59  | 30 | 30 | 50 | 5.3 | -14.89  | 60 | 30 | 50 | 5.3 | -19.08  | 90   | 30 | 50 | 5.3 | -26.31  |
| 0 | 30 | 50 | 5.4 | -11.83  | 30 | 30 | 50 | 5.4 | -13.05  | 60 | 30 | 50 | 5.4 | -16.93  | 90   | 30 | 50 | 5.4 | -23.60  |
| 0 | 30 | 50 | 5.5 | -10.24  | 30 | 30 | 50 | 5.5 | -11.37  | 60 | 30 | 50 | 5.5 | -14.98  | 90   | 30 | 50 | 5.5 | -21.13  |
| 0 | 30 | 50 | 5.6 | -8.82   | 30 | 30 | 50 | 5.6 | -9.88   | 60 | 30 | 50 | 5.6 | -13.23  | 90   | 30 | 50 | 5.6 | -18.90  |
| 0 | 30 | 50 | 5.7 | -7.57   | 30 | 30 | 50 | 5.7 | -8.56   | 60 | 30 | 50 | 5.7 | -11.67  | 90   | 30 | 50 | 5.7 | -16.91  |
| 0 | 30 | 50 | 5.8 | -6.47   | 30 | 30 | 50 | 5.8 | -7.40   | 60 | 30 | 50 | 5.8 | -10.28  | 90   | 30 | 50 | 5.8 | -15.12  |
| 0 | 30 | 50 | 5.9 | -5.52   | 30 | 30 | 50 | 5.9 | -6.38   | 60 | 30 | 50 | 5.9 | -9.06   | 90   | 30 | 50 | 5.9 | -13.53  |
| 0 | 30 | 50 | 6   | -4.69   | 30 | 30 | 50 | 6   | -5.49   | 60 | 30 | 50 | 6   | -7.98   | 90   | 30 | 50 | 6   | -12.12  |
| 0 | 30 | 50 | 6.5 | -1.98   | 30 | 30 | 50 | 6.5 | -2.55   | 60 | 30 | 50 | 6.5 | -4.29   | 90   | 30 | 50 | 6.5 | -7.13   |
| 0 | 30 | 50 | 7   | -0.73   | 30 | 30 | 50 | 7   | -1.14   | 60 | 30 | 50 | 7   | -2.38   | 90   | 30 | 50 | 7   | -4.37   |
| 0 | 30 | 50 | 7.5 | -0.17   | 30 | 30 | 50 | 7.5 | -0.47   | 60 | 30 | 50 | 7.5 | -1.37   | 90   | 30 | 50 | 7.5 | -2.79   |
| 0 | 30 | 50 | 8   | 0.07    | 30 | 30 | 50 | 8   | -0.15   | 60 | 30 | 50 | 8   | -0.81   | 90   | 30 | 50 | 8   | -1.85   |
| 0 | 30 | 50 | 8.5 | 0.17    | 30 | 30 | 50 | 8.5 | 0.00    | 60 | 30 | 50 | 8.5 | -0.49   | 90   | 30 | 50 | 8.5 | -1.26   |
| 0 | 30 | 50 | 9   | 0.19    | 30 | 30 | 50 | 9   | 0.07    | 60 | 30 | 50 | 9   | -0.31   | 90</ |    |    |     |         |

|   |    |    |     |               |    |    |    |     |               |    |    |    |     |               |    |    |    |     |               |
|---|----|----|-----|---------------|----|----|----|-----|---------------|----|----|----|-----|---------------|----|----|----|-----|---------------|
| 0 | 30 | 60 | 3.7 | -7.80         | 30 | 30 | 60 | 3.7 | -8.00         | 60 | 30 | 60 | 3.7 | -10.82        | 90 | 30 | 60 | 3.7 | -20.02        |
| 0 | 30 | 60 | 3.8 | -22.45        | 30 | 30 | 60 | 3.8 | -22.97        | 60 | 30 | 60 | 3.8 | -26.49        | 90 | 30 | 60 | 3.8 | -36.24        |
| 0 | 30 | 60 | 3.9 | -30.77        | 30 | 30 | 60 | 3.9 | -31.50        | 60 | 30 | 60 | 3.9 | -35.45        | 90 | 30 | 60 | 3.9 | -45.37        |
| 0 | 30 | 60 | 4   | -34.74        | 30 | 30 | 60 | 4   | -35.62        | 60 | 30 | 60 | 4   | -39.79        | 90 | 30 | 60 | 4   | -49.63        |
| 0 | 30 | 60 | 4.1 | <b>-35.78</b> | 30 | 30 | 60 | 4.1 | <b>-36.75</b> | 60 | 30 | 60 | 4.1 | <b>-41.01</b> | 90 | 30 | 60 | 4.1 | <b>-50.60</b> |
| 0 | 30 | 60 | 4.2 | -34.92        | 30 | 30 | 60 | 4.2 | -35.94        | 60 | 30 | 60 | 4.2 | -40.18        | 90 | 30 | 60 | 4.2 | -49.41        |
| 0 | 30 | 60 | 4.3 | -32.90        | 30 | 30 | 60 | 4.3 | -33.93        | 60 | 30 | 60 | 4.3 | -38.10        | 90 | 30 | 60 | 4.3 | -46.89        |
| 0 | 30 | 60 | 4.4 | -30.22        | 30 | 30 | 60 | 4.4 | -31.26        | 60 | 30 | 60 | 4.4 | -35.29        | 90 | 30 | 60 | 4.4 | -43.62        |
| 0 | 30 | 60 | 4.5 | -27.25        | 30 | 30 | 60 | 4.5 | -28.27        | 60 | 30 | 60 | 4.5 | -32.15        | 90 | 30 | 60 | 4.5 | -39.99        |
| 0 | 30 | 60 | 4.6 | -24.22        | 30 | 30 | 60 | 4.6 | -25.22        | 60 | 30 | 60 | 4.6 | -28.92        | 90 | 30 | 60 | 4.6 | -36.27        |
| 0 | 30 | 60 | 4.7 | -21.29        | 30 | 30 | 60 | 4.7 | -22.25        | 60 | 30 | 60 | 4.7 | -25.76        | 90 | 30 | 60 | 4.7 | -32.64        |
| 0 | 30 | 60 | 4.8 | -18.53        | 30 | 30 | 60 | 4.8 | -19.45        | 60 | 30 | 60 | 4.8 | -22.78        | 90 | 30 | 60 | 4.8 | -29.21        |
| 0 | 30 | 60 | 4.9 | -16.00        | 30 | 30 | 60 | 4.9 | -16.88        | 60 | 30 | 60 | 4.9 | -20.02        | 90 | 30 | 60 | 4.9 | -26.01        |
| 0 | 30 | 60 | 5   | -13.72        | 30 | 30 | 60 | 5   | -14.56        | 60 | 30 | 60 | 5   | -17.52        | 90 | 30 | 60 | 5   | -23.09        |
| 0 | 30 | 60 | 5.1 | -11.70        | 30 | 30 | 60 | 5.1 | -12.49        | 60 | 30 | 60 | 5.1 | -15.27        | 90 | 30 | 60 | 5.1 | -20.46        |
| 0 | 30 | 60 | 5.2 | -9.91         | 30 | 30 | 60 | 5.2 | -10.66        | 60 | 30 | 60 | 5.2 | -13.27        | 90 | 30 | 60 | 5.2 | -18.09        |
| 0 | 30 | 60 | 5.3 | -8.34         | 30 | 30 | 60 | 5.3 | -9.06         | 60 | 30 | 60 | 5.3 | -11.50        | 90 | 30 | 60 | 5.3 | -15.99        |
| 0 | 30 | 60 | 5.4 | -6.99         | 30 | 30 | 60 | 5.4 | -7.66         | 60 | 30 | 60 | 5.4 | -9.95         | 90 | 30 | 60 | 5.4 | -14.13        |
| 0 | 30 | 60 | 5.5 | -5.82         | 30 | 30 | 60 | 5.5 | -6.45         | 60 | 30 | 60 | 5.5 | -8.60         | 90 | 30 | 60 | 5.5 | -12.48        |
| 0 | 30 | 60 | 5.6 | -4.81         | 30 | 30 | 60 | 5.6 | -5.41         | 60 | 30 | 60 | 5.6 | -7.42         | 90 | 30 | 60 | 5.6 | -11.03        |
| 0 | 30 | 60 | 5.7 | -3.95         | 30 | 30 | 60 | 5.7 | -4.51         | 60 | 30 | 60 | 5.7 | -6.39         | 90 | 30 | 60 | 5.7 | -9.76         |
| 0 | 30 | 60 | 5.8 | -3.21         | 30 | 30 | 60 | 5.8 | -3.74         | 60 | 30 | 60 | 5.8 | -5.50         | 90 | 30 | 60 | 5.8 | -8.64         |
| 0 | 30 | 60 | 5.9 | -2.59         | 30 | 30 | 60 | 5.9 | -3.08         | 60 | 30 | 60 | 5.9 | -4.74         | 90 | 30 | 60 | 5.9 | -7.66         |
| 0 | 30 | 60 | 6   | -2.05         | 30 | 30 | 60 | 6   | -2.52         | 60 | 30 | 60 | 6   | -4.07         | 90 | 30 | 60 | 6   | -6.79         |
| 0 | 30 | 60 | 6.5 | -0.42         | 30 | 30 | 60 | 6.5 | -0.77         | 60 | 30 | 60 | 6.5 | -1.89         | 90 | 30 | 60 | 6.5 | -3.83         |
| 0 | 30 | 60 | 7   | 0.24          | 30 | 30 | 60 | 7   | -0.02         | 60 | 30 | 60 | 7   | -0.85         | 90 | 30 | 60 | 7   | -2.25         |
| 0 | 30 | 60 | 7.5 | 0.47          | 30 | 30 | 60 | 7.5 | 0.27          | 60 | 30 | 60 | 7.5 | -0.34         | 90 | 30 | 60 | 7.5 | -1.37         |
| 0 | 30 | 60 | 8   | 0.51          | 30 | 30 | 60 | 8   | 0.36          | 60 | 30 | 60 | 8   | -0.09         | 90 | 30 | 60 | 8   | -0.86         |
| 0 | 30 | 60 | 8.5 | 0.48          | 30 | 30 | 60 | 8.5 | 0.37          | 60 | 30 | 60 | 8.5 | 0.02          | 90 | 30 | 60 | 8.5 | -0.56         |
| 0 | 30 | 60 | 9   | 0.43          | 30 | 30 | 60 | 9   | 0.34          | 60 | 30 | 60 | 9   | 0.07          | 90 | 30 | 60 | 9   | -0.37         |
| 0 | 30 | 60 | 9.5 | 0.37          | 30 | 30 | 60 | 9.5 | 0.30          | 60 | 30 | 60 | 9.5 | 0.10          | 90 | 30 | 60 | 9.5 | -0.24         |
| 0 | 30 | 60 | 10  | 0.31          | 30 | 30 | 60 | 10  | 0.26          | 60 | 30 | 60 | 10  | 0.10          | 90 | 30 | 60 | 10  | -0.17         |
| 0 | 30 | 60 | 12  | 0.15          | 30 | 30 | 60 | 12  | 0.13          | 60 | 30 | 60 | 12  | 0.07          | 90 | 30 | 60 | 12  | -0.04         |
| 0 | 30 | 60 | 15  | 0.05          | 30 | 30 | 60 | 15  | 0.04          | 60 | 30 | 60 | 15  | 0.03          | 90 | 30 | 60 | 15  | 0.00          |
| 0 | 30 | 60 | 20  | 0.00          | 30 | 30 | 60 | 20  | 0.00          | 60 | 30 | 60 | 20  | 0.00          | 90 | 30 | 60 | 20  | 0.00          |
| 0 | 30 | 70 | 2.5 | 1824.13       | 30 | 30 | 70 | 2.5 | 1837.42       | 60 | 30 | 70 | 2.5 | 1873.11       | 90 | 30 | 70 | 2.5 | 1922.35       |
| 0 | 30 | 70 | 2.6 | 1253.40       | 30 | 30 | 70 | 2.6 | 1263.95       | 60 | 30 | 70 | 2.6 | 1291.21       | 90 | 30 | 70 | 2.6 | 1326.16       |
| 0 | 30 | 70 | 2.7 | 842.25        | 30 | 30 | 70 | 2.7 | 850.46        | 60 | 30 | 70 | 2.7 | 870.82        | 90 | 30 | 70 | 2.7 | 894.61        |
| 0 | 30 | 70 | 2.8 | 549.21        | 30 | 30 | 70 | 2.8 | 555.48        | 60 | 30 | 70 | 2.8 | 570.28        | 90 | 30 | 70 | 2.8 | 585.46        |
| 0 | 30 | 70 | 2.9 | 342.96        | 30 | 30 | 70 | 2.9 | 347.64        | 60 | 30 | 70 | 2.9 | 358.00        | 90 | 30 | 70 | 2.9 | 366.61        |
| 0 | 30 | 70 | 3   | 199.94        | 30 | 30 | 70 | 3   | 203.36        | 60 | 30 | 70 | 3   | 210.22        | 90 | 30 | 70 | 3   | 213.94        |
| 0 | 30 | 70 | 3.1 | 102.60        | 30 | 30 | 70 | 3.1 | 105.03        | 60 | 30 | 70 | 3.1 | 109.24        | 90 | 30 | 70 | 3.1 | 109.40        |
| 0 | 30 | 70 | 3.2 | 37.94         | 30 | 30 | 70 | 3.2 | 39.62         | 60 | 30 | 70 | 3.2 | 41.88         | 90 | 30 | 70 | 3.2 | 39.55         |
| 0 | 30 | 70 | 3.3 | -3.62         | 30 | 30 | 70 | 3.3 | -2.49         | 60 | 30 | 70 | 3.3 | -1.62         | 90 | 30 | 70 | 3.3 | -5.60         |
| 0 | 30 | 70 | 3.4 | -29.06        | 30 | 30 | 70 | 3.4 | -28.33        | 60 | 30 | 70 | 3.4 | -28.43        | 90 | 30 | 70 | 3.4 | -33.46        |
| 0 | 30 | 70 | 3.5 | -43.42        | 30 | 30 | 70 | 3.5 | -43.00        | 60 | 30 | 70 | 3.5 | -43.78        | 90 | 30 | 70 | 3.5 | -49.42        |
| 0 | 30 | 70 | 3.6 | -50.33        | 30 | 30 | 70 | 3.6 | -50.14        | 60 | 30 | 70 | 3.6 | -51.39        | 90 | 30 | 70 | 3.6 | -57.35        |
| 0 | 30 | 70 | 3.7 | <b>-52.35</b> | 30 | 30 | 70 | 3.7 | <b>-52.32</b> | 60 | 30 | 70 | 3.7 | <b>-53.91</b> | 90 | 30 | 70 | 3.7 | <b>-59.96</b> |
| 0 | 30 | 70 | 3.8 | -51.26        | 30 | 30 | 70 | 3.8 | -51.36        | 60 | 30 | 70 | 3.8 | -53.16        | 90 | 30 | 70 | 3.8 | -59.17        |
| 0 | 30 | 70 | 3.9 | -48.30        | 30 | 30 | 70 | 3.9 | -48.50        | 60 | 30 | 70 | 3.9 | -50.42        | 90 | 30 | 70 | 3.9 | -56.29        |
| 0 | 30 | 70 | 4   | -44.32        | 30 | 30 | 70 | 4   | -44.58        | 60 | 30 | 70 | 4   | -46.57        | 90 | 30 | 70 | 4   | -52.23        |
| 0 | 30 | 70 | 4.1 | -39.88        | 30 | 30 | 70 | 4.1 | -40.20        | 60 | 30 | 70 | 4.1 | -42.19        | 90 | 30 | 70 | 4.1 | -47.61        |
| 0 | 30 | 70 | 4.2 | -35.37        | 30 | 30 | 70 | 4.2 | -35.71        | 60 | 30 | 70 | 4.2 | -37.68        | 90 | 30 | 70 | 4.2 | -42.83        |
| 0 | 30 | 70 | 4.3 | -31.00        | 30 | 30 | 70 | 4.3 | -31.36        | 60 | 30 | 70 | 4.3 | -33.29        | 90 | 30 | 70 | 4.3 | -38.16        |
| 0 | 30 | 70 | 4.4 | -26.92        | 30 | 30 | 70 | 4.4 | -27.29        | 60 | 30 | 70 | 4.4 | -29.16        | 90 | 30 | 70 | 4.4 | -33.74        |
| 0 | 30 | 70 | 4.5 | -23.19        | 30 | 30 | 70 | 4.5 | -23.56        | 60 | 30 | 70 | 4.5 | -25.36        | 90 | 30 | 70 | 4.5 | -29.67        |
| 0 | 30 | 70 | 4.6 | -19.85        | 30 | 30 | 70 | 4.6 | -20.22        | 60 | 30 | 70 | 4.6 | -21.95        | 90 | 30 | 70 | 4.6 | -25.98        |
| 0 | 30 | 70 | 4.7 | -16.89        | 30 | 30 | 70 | 4.7 | -17.26        | 60 | 30 | 70 | 4.7 | -18.90        | 90 | 30 | 70 | 4.7 | -22.68        |
| 0 | 30 | 70 | 4.8 | -14.30        | 30 | 30 | 70 | 4.8 | -14.65        | 60 | 30 | 70 | 4.8 | -16.22        | 90 | 30 | 70 | 4.8 | -19.75        |
| 0 | 30 | 70 | 4.9 | -12.04        | 30 | 30 | 70 | 4.9 | -12.39        | 60 | 30 | 70 | 4.9 | -13.87        | 90 | 30 | 70 | 4.9 | -17.18        |
| 0 | 30 | 70 | 5   | -10.09        | 30 | 30 | 70 | 5   | -10.43        | 60 | 30 | 70 | 5   | -11.83        | 90 | 30 | 70 | 5   | -14.92        |
| 0 | 30 | 70 | 5.1 | -8.41         | 30 | 30 | 70 | 5.1 | -8.73         | 60 | 30 | 70 | 5.1 | -10.06        | 90 | 30 | 70 | 5.1 | -12.95        |
| 0 | 30 | 70 | 5.2 | -6.97         | 30 | 30 | 70 | 5.2 | -7.28         | 60 | 30 | 70 | 5.2 | -8.54         | 90 | 30 | 70 | 5.2 | -11.24        |
| 0 | 30 | 70 | 5.3 | -5.75         | 30 | 30 | 70 | 5.3 | -6.04         | 60 | 30 | 70 | 5.3 | -7.23         | 90 | 30 | 70 | 5.3 | -9.75         |
| 0 | 30 | 70 | 5.4 | -4.70         | 30 | 30 | 70 | 5.4 | -4.99         | 60 | 30 | 70 | 5.4 | -6.11         | 90 | 30 | 70 | 5.4 | -8.46         |
| 0 | 30 | 70 | 5.5 | -3.82         | 30 | 30 | 70 | 5.5 | -4.09         | 60 | 30 | 70 | 5.5 | -5.14         | 90 | 30 | 70 | 5.5 | -7.35         |
| 0 | 30 | 70 | 5.6 | -3.07         | 30 | 30 | 70 | 5.6 | -3.32         | 60 | 30 | 70 | 5.6 | -4.32         | 90 | 30 | 70 | 5.6 | -6.38         |
| 0 | 30 | 70 | 5.7 | -2.43         | 30 | 30 | 70 | 5.7 | -2.68         | 60 | 30 | 70 | 5.7 | -3.61         | 90 | 30 | 70 | 5.7 | -5.54         |
| 0 | 30 | 70 | 5.8 | -1.90         | 30 | 30 | 70 | 5.8 | -2.13         | 60 | 30 | 70 | 5.8 | -3.01         | 90 | 30 | 70 | 5.8 | -4.82         |
| 0 | 30 | 70 | 5.9 | -1.44         | 30 | 30 | 70 | 5.9 | -1.67         | 60 | 30 | 70 | 5.9 | -2.50         | 90 | 30 | 70 | 5.9 | -4.19         |
| 0 | 30 | 70 | 6   | -1.07         | 30 | 30 | 70 | 6   | -1.28         | 60 | 30 | 70 | 6   | -2.06         | 90 | 30 | 70 | 6   | -3.65         |
| 0 | 30 | 70 | 6.5 | 0.07          | 30 | 30 | 70 | 6.5 | -0.09         | 60 | 30 | 70 | 6.5 | -0.68         | 90 | 30 | 70 | 6.5 | -1.83         |
| 0 | 30 | 70 | 7   | 0.49          | 30 | 30 | 70 | 7   | 0.37          | 60 | 30 | 70 | 7   | -0.07         | 90 | 30 | 70 | 7   | -0.93         |
| 0 | 30 | 70 | 7.5 | 0.61          | 30 | 30 | 70 | 7.5 | 0.52          | 60 | 30 | 70 | 7.5 | 0.18          | 90 | 30 | 70 | 7.5 | -0.46         |
| 0 | 30 | 70 | 8   | 0.60          | 30 | 30 | 70 | 8   | 0.53          | 60 | 30 | 70 | 8   | 0.27          | 90 | 30 | 70 | 8   | -0.21         |
| 0 | 30 | 70 | 8.5 | 0.54          | 30 | 30 | 70 | 8.5 | 0.49          | 60 | 30 | 70 | 8.5 | 0.29          | 90 | 30 | 70 | 8.5 | -0.08         |
| 0 | 30 | 70 | 9   | 0.47          | 30 | 30 | 70 | 9   | 0.43          | 60 | 30 | 70 | 9   | 0.27          | 90 | 30 | 70 | 9   | -0.01         |
| 0 | 30 | 70 | 9.5 | 0.40          | 30 | 30 | 70 | 9.5 | 0.37          | 60 | 30 | 70 | 9.5 | 0.25          | 90 | 30 | 70 | 9.5 | 0.02          |
| 0 | 30 | 70 | 10  | 0.34          | 30 | 30 | 70 |     |               |    |    |    |     |               |    |    |    |     |               |

|   |    |    |     |               |    |    |    |     |               |    |    |    |     |               |    |    |    |     |               |
|---|----|----|-----|---------------|----|----|----|-----|---------------|----|----|----|-----|---------------|----|----|----|-----|---------------|
| 0 | 30 | 80 | 3.8 | -58.92        | 30 | 30 | 80 | 3.8 | -58.30        | 60 | 30 | 80 | 3.8 | -57.84        | 90 | 30 | 80 | 3.8 | -60.14        |
| 0 | 30 | 80 | 3.9 | -52.22        | 30 | 30 | 80 | 3.9 | -51.70        | 60 | 30 | 80 | 3.9 | -51.40        | 90 | 30 | 80 | 3.9 | -53.64        |
| 0 | 30 | 80 | 4   | -45.77        | 30 | 30 | 80 | 4   | -45.33        | 60 | 30 | 80 | 4   | -45.16        | 90 | 30 | 80 | 4   | -47.31        |
| 0 | 30 | 80 | 4.1 | -39.78        | 30 | 30 | 80 | 4.1 | -39.41        | 60 | 30 | 80 | 4.1 | -39.33        | 90 | 30 | 80 | 4.1 | -41.38        |
| 0 | 30 | 80 | 4.2 | -34.34        | 30 | 30 | 80 | 4.2 | -34.03        | 60 | 30 | 80 | 4.2 | -34.01        | 90 | 30 | 80 | 4.2 | -35.96        |
| 0 | 30 | 80 | 4.3 | -29.48        | 30 | 30 | 80 | 4.3 | -29.22        | 60 | 30 | 80 | 4.3 | -29.25        | 90 | 30 | 80 | 4.3 | -31.09        |
| 0 | 30 | 80 | 4.4 | -25.20        | 30 | 30 | 80 | 4.4 | -24.98        | 60 | 30 | 80 | 4.4 | -25.05        | 90 | 30 | 80 | 4.4 | -26.78        |
| 0 | 30 | 80 | 4.5 | -21.47        | 30 | 30 | 80 | 4.5 | -21.27        | 60 | 30 | 80 | 4.5 | -21.37        | 90 | 30 | 80 | 4.5 | -23.00        |
| 0 | 30 | 80 | 4.6 | -18.23        | 30 | 30 | 80 | 4.6 | -18.06        | 60 | 30 | 80 | 4.6 | -18.18        | 90 | 30 | 80 | 4.6 | -19.71        |
| 0 | 30 | 80 | 4.7 | -15.43        | 30 | 30 | 80 | 4.7 | -15.29        | 60 | 30 | 80 | 4.7 | -15.42        | 90 | 30 | 80 | 4.7 | -16.86        |
| 0 | 30 | 80 | 4.8 | -13.03        | 30 | 30 | 80 | 4.8 | -12.91        | 60 | 30 | 80 | 4.8 | -13.06        | 90 | 30 | 80 | 4.8 | -14.40        |
| 0 | 30 | 80 | 4.9 | -10.98        | 30 | 30 | 80 | 4.9 | -10.87        | 60 | 30 | 80 | 4.9 | -11.03        | 90 | 30 | 80 | 4.9 | -12.29        |
| 0 | 30 | 80 | 5   | -9.23         | 30 | 30 | 80 | 5   | -9.14         | 60 | 30 | 80 | 5   | -9.30         | 90 | 30 | 80 | 5   | -10.48        |
| 0 | 30 | 80 | 5.1 | -7.74         | 30 | 30 | 80 | 5.1 | -7.66         | 60 | 30 | 80 | 5.1 | -7.82         | 90 | 30 | 80 | 5.1 | -8.93         |
| 0 | 30 | 80 | 5.2 | -6.47         | 30 | 30 | 80 | 5.2 | -6.40         | 60 | 30 | 80 | 5.2 | -6.56         | 90 | 30 | 80 | 5.2 | -7.60         |
| 0 | 30 | 80 | 5.3 | -5.39         | 30 | 30 | 80 | 5.3 | -5.33         | 60 | 30 | 80 | 5.3 | -5.49         | 90 | 30 | 80 | 5.3 | -6.47         |
| 0 | 30 | 80 | 5.4 | -4.47         | 30 | 30 | 80 | 5.4 | -4.42         | 60 | 30 | 80 | 5.4 | -4.58         | 90 | 30 | 80 | 5.4 | -5.50         |
| 0 | 30 | 80 | 5.5 | -3.69         | 30 | 30 | 80 | 5.5 | -3.65         | 60 | 30 | 80 | 5.5 | -3.81         | 90 | 30 | 80 | 5.5 | -4.67         |
| 0 | 30 | 80 | 5.6 | -3.04         | 30 | 30 | 80 | 5.6 | -3.00         | 60 | 30 | 80 | 5.6 | -3.15         | 90 | 30 | 80 | 5.6 | -3.96         |
| 0 | 30 | 80 | 5.7 | -2.48         | 30 | 30 | 80 | 5.7 | -2.44         | 60 | 30 | 80 | 5.7 | -2.60         | 90 | 30 | 80 | 5.7 | -3.35         |
| 0 | 30 | 80 | 5.8 | -2.00         | 30 | 30 | 80 | 5.8 | -1.98         | 60 | 30 | 80 | 5.8 | -2.12         | 90 | 30 | 80 | 5.8 | -2.84         |
| 0 | 30 | 80 | 5.9 | -1.60         | 30 | 30 | 80 | 5.9 | -1.58         | 60 | 30 | 80 | 5.9 | -1.72         | 90 | 30 | 80 | 5.9 | -2.39         |
| 0 | 30 | 80 | 6   | -1.26         | 30 | 30 | 80 | 6   | -1.24         | 60 | 30 | 80 | 6   | -1.38         | 90 | 30 | 80 | 6   | -2.01         |
| 0 | 30 | 80 | 6.5 | -0.21         | 30 | 30 | 80 | 6.5 | -0.20         | 60 | 30 | 80 | 6.5 | -0.32         | 90 | 30 | 80 | 6.5 | -0.79         |
| 0 | 30 | 80 | 7   | 0.23          | 30 | 30 | 80 | 7   | 0.23          | 60 | 30 | 80 | 7   | 0.13          | 90 | 30 | 80 | 7   | -0.22         |
| 0 | 30 | 80 | 7.5 | 0.38          | 30 | 30 | 80 | 7.5 | 0.38          | 60 | 30 | 80 | 7.5 | 0.31          | 90 | 30 | 80 | 7.5 | 0.04          |
| 0 | 30 | 80 | 8   | 0.42          | 30 | 30 | 80 | 8   | 0.41          | 60 | 30 | 80 | 8   | 0.35          | 90 | 30 | 80 | 8   | 0.15          |
| 0 | 30 | 80 | 8.5 | 0.40          | 30 | 30 | 80 | 8.5 | 0.39          | 60 | 30 | 80 | 8.5 | 0.34          | 90 | 30 | 80 | 8.5 | 0.19          |
| 0 | 30 | 80 | 9   | 0.36          | 30 | 30 | 80 | 9   | 0.35          | 60 | 30 | 80 | 9   | 0.31          | 90 | 30 | 80 | 9   | 0.19          |
| 0 | 30 | 80 | 9.5 | 0.31          | 30 | 30 | 80 | 9.5 | 0.31          | 60 | 30 | 80 | 9.5 | 0.27          | 90 | 30 | 80 | 9.5 | 0.18          |
| 0 | 30 | 80 | 10  | 0.26          | 30 | 30 | 80 | 10  | 0.26          | 60 | 30 | 80 | 10  | 0.23          | 90 | 30 | 80 | 10  | 0.16          |
| 0 | 30 | 80 | 12  | 0.13          | 30 | 30 | 80 | 12  | 0.13          | 60 | 30 | 80 | 12  | 0.12          | 90 | 30 | 80 | 12  | 0.09          |
| 0 | 30 | 80 | 15  | 0.05          | 30 | 30 | 80 | 15  | 0.05          | 60 | 30 | 80 | 15  | 0.04          | 90 | 30 | 80 | 15  | 0.03          |
| 0 | 30 | 80 | 20  | 0.00          | 30 | 30 | 80 | 20  | 0.00          | 60 | 30 | 80 | 20  | 0.00          | 90 | 30 | 80 | 20  | 0.00          |
| 0 | 30 | 90 | 2.5 | 1053.89       | 30 | 30 | 90 | 2.5 | 1061.30       | 60 | 30 | 90 | 2.5 | 1076.03       | 90 | 30 | 90 | 2.5 | 1083.31       |
| 0 | 30 | 90 | 2.6 | 540.96        | 30 | 30 | 90 | 2.6 | 547.63        | 60 | 30 | 90 | 2.6 | 560.91        | 90 | 30 | 90 | 2.6 | 567.50        |
| 0 | 30 | 90 | 2.7 | 230.20        | 30 | 30 | 90 | 2.7 | 236.15        | 60 | 30 | 90 | 2.7 | 248.02        | 90 | 30 | 90 | 2.7 | 253.93        |
| 0 | 30 | 90 | 2.8 | 91.73         | 30 | 30 | 90 | 2.8 | 97.01         | 60 | 30 | 90 | 2.8 | 107.55        | 90 | 30 | 90 | 2.8 | 112.79        |
| 0 | 30 | 90 | 2.9 | 3.74          | 30 | 30 | 90 | 2.9 | 8.43          | 60 | 30 | 90 | 2.9 | 17.74         | 90 | 30 | 90 | 2.9 | 22.37         |
| 0 | 30 | 90 | 3   | -49.48        | 30 | 30 | 90 | 3   | -45.33        | 60 | 30 | 90 | 3   | -37.11        | 90 | 30 | 90 | 3   | -33.04        |
| 0 | 30 | 90 | 3.1 | -79.17        | 30 | 30 | 90 | 3.1 | -75.51        | 60 | 30 | 90 | 3.1 | -68.25        | 90 | 30 | 90 | 3.1 | -64.65        |
| 0 | 30 | 90 | 3.2 | -93.29        | 30 | 30 | 90 | 3.2 | -90.05        | 60 | 30 | 90 | 3.2 | -83.62        | 90 | 30 | 90 | 3.2 | -80.43        |
| 0 | 30 | 90 | 3.3 | <b>-97.38</b> | 30 | 30 | 90 | 3.3 | <b>-94.51</b> | 60 | 30 | 90 | 3.3 | <b>-88.80</b> | 90 | 30 | 90 | 3.3 | <b>-85.97</b> |
| 0 | 30 | 90 | 3.4 | -95.28        | 30 | 30 | 90 | 3.4 | -92.72        | 60 | 30 | 90 | 3.4 | -87.66        | 90 | 30 | 90 | 3.4 | -85.13        |
| 0 | 30 | 90 | 3.5 | -89.57        | 30 | 30 | 90 | 3.5 | -87.31        | 60 | 30 | 90 | 3.5 | -82.81        | 90 | 30 | 90 | 3.5 | -80.56        |
| 0 | 30 | 90 | 3.6 | -82.02        | 30 | 30 | 90 | 3.6 | -80.01        | 60 | 30 | 90 | 3.6 | -76.00        | 90 | 30 | 90 | 3.6 | -74.00        |
| 0 | 30 | 90 | 3.7 | -73.74        | 30 | 30 | 90 | 3.7 | -71.95        | 60 | 30 | 90 | 3.7 | -68.38        | 90 | 30 | 90 | 3.7 | -66.59        |
| 0 | 30 | 90 | 3.8 | -65.44        | 30 | 30 | 90 | 3.8 | -63.84        | 60 | 30 | 90 | 3.8 | -60.64        | 90 | 30 | 90 | 3.8 | -59.03        |
| 0 | 30 | 90 | 3.9 | -57.52        | 30 | 30 | 90 | 3.9 | -56.08        | 60 | 30 | 90 | 3.9 | -53.20        | 90 | 30 | 90 | 3.9 | -51.75        |
| 0 | 30 | 90 | 4   | -50.20        | 30 | 30 | 90 | 4   | -48.90        | 60 | 30 | 90 | 4   | -46.30        | 90 | 30 | 90 | 4   | -44.99        |
| 0 | 30 | 90 | 4.1 | -43.58        | 30 | 30 | 90 | 4.1 | -42.40        | 60 | 30 | 90 | 4.1 | -40.04        | 90 | 30 | 90 | 4.1 | -38.86        |
| 0 | 30 | 90 | 4.2 | -37.68        | 30 | 30 | 90 | 4.2 | -36.61        | 60 | 30 | 90 | 4.2 | -34.47        | 90 | 30 | 90 | 4.2 | -33.39        |
| 0 | 30 | 90 | 4.3 | -32.49        | 30 | 30 | 90 | 4.3 | -31.51        | 60 | 30 | 90 | 4.3 | -29.56        | 90 | 30 | 90 | 4.3 | -28.58        |
| 0 | 30 | 90 | 4.4 | -27.95        | 30 | 30 | 90 | 4.4 | -27.07        | 60 | 30 | 90 | 4.4 | -25.28        | 90 | 30 | 90 | 4.4 | -24.39        |
| 0 | 30 | 90 | 4.5 | -24.02        | 30 | 30 | 90 | 4.5 | -23.21        | 60 | 30 | 90 | 4.5 | -21.58        | 90 | 30 | 90 | 4.5 | -20.76        |
| 0 | 30 | 90 | 4.6 | -20.62        | 30 | 30 | 90 | 4.6 | -19.88        | 60 | 30 | 90 | 4.6 | -18.39        | 90 | 30 | 90 | 4.6 | -17.64        |
| 0 | 30 | 90 | 4.7 | -17.70        | 30 | 30 | 90 | 4.7 | -17.02        | 60 | 30 | 90 | 4.7 | -15.66        | 90 | 30 | 90 | 4.7 | -14.97        |
| 0 | 30 | 90 | 4.8 | -15.19        | 30 | 30 | 90 | 4.8 | -14.56        | 60 | 30 | 90 | 4.8 | -13.31        | 90 | 30 | 90 | 4.8 | -12.69        |
| 0 | 30 | 90 | 4.9 | -13.03        | 30 | 30 | 90 | 4.9 | -12.46        | 60 | 30 | 90 | 4.9 | -11.31        | 90 | 30 | 90 | 4.9 | -10.74        |
| 0 | 30 | 90 | 5   | -11.19        | 30 | 30 | 90 | 5   | -10.66        | 60 | 30 | 90 | 5   | -9.61         | 90 | 30 | 90 | 5   | -9.08         |
| 0 | 30 | 90 | 5.1 | -9.61         | 30 | 30 | 90 | 5.1 | -9.13         | 60 | 30 | 90 | 5.1 | -8.16         | 90 | 30 | 90 | 5.1 | -7.67         |
| 0 | 30 | 90 | 5.2 | -8.26         | 30 | 30 | 90 | 5.2 | -7.82         | 60 | 30 | 90 | 5.2 | -6.92         | 90 | 30 | 90 | 5.2 | -6.47         |
| 0 | 30 | 90 | 5.3 | -7.10         | 30 | 30 | 90 | 5.3 | -6.69         | 60 | 30 | 90 | 5.3 | -5.86         | 90 | 30 | 90 | 5.3 | -5.45         |
| 0 | 30 | 90 | 5.4 | -6.11         | 30 | 30 | 90 | 5.4 | -5.73         | 60 | 30 | 90 | 5.4 | -4.96         | 90 | 30 | 90 | 5.4 | -4.58         |
| 0 | 30 | 90 | 5.5 | -5.26         | 30 | 30 | 90 | 5.5 | -4.90         | 60 | 30 | 90 | 5.5 | -4.20         | 90 | 30 | 90 | 5.5 | -3.84         |
| 0 | 30 | 90 | 5.6 | -4.52         | 30 | 30 | 90 | 5.6 | -4.20         | 60 | 30 | 90 | 5.6 | -3.54         | 90 | 30 | 90 | 5.6 | -3.21         |
| 0 | 30 | 90 | 5.7 | -3.89         | 30 | 30 | 90 | 5.7 | -3.59         | 60 | 30 | 90 | 5.7 | -2.98         | 90 | 30 | 90 | 5.7 | -2.68         |
| 0 | 30 | 90 | 5.8 | -3.35         | 30 | 30 | 90 | 5.8 | -3.07         | 60 | 30 | 90 | 5.8 | -2.51         | 90 | 30 | 90 | 5.8 | -2.22         |
| 0 | 30 | 90 | 5.9 | -2.88         | 30 | 30 | 90 | 5.9 | -2.62         | 60 | 30 | 90 | 5.9 | -2.10         | 90 | 30 | 90 | 5.9 | -1.83         |
| 0 | 30 | 90 | 6   | -2.48         | 30 | 30 | 90 | 6   | -2.24         | 60 | 30 | 90 | 6   | -1.75         | 90 | 30 | 90 | 6   | -1.50         |
| 0 | 30 | 90 | 6.5 | -1.14         | 30 | 30 | 90 | 6.5 | -0.97         | 60 | 30 | 90 | 6.5 | -0.63         | 90 | 30 | 90 | 6.5 | -0.46         |
| 0 | 30 | 90 | 7   | -0.49         | 30 | 30 | 90 | 7   | -0.37         | 60 | 30 | 90 | 7   | -0.12         | 90 | 30 | 90 | 7   | 0.00          |
| 0 | 30 | 90 | 7.5 | -0.16         | 30 | 30 | 90 | 7.5 | -0.07         | 60 | 30 | 90 | 7.5 | 0.11          | 90 | 30 | 90 | 7.5 | 0.20          |
| 0 | 30 | 90 | 8   | 0.00          | 30 | 30 | 90 | 8   | 0.06          | 60 | 30 | 90 | 8   | 0.20          | 90 | 30 | 90 | 8   | 0.26          |
| 0 | 30 | 90 | 8.5 | 0.07          | 30 | 30 | 90 | 8.5 | 0.12          | 60 | 30 | 90 | 8.5 | 0.22          | 90 | 30 | 90 | 8.5 | 0.27          |
| 0 | 30 | 90 | 9   | 0.10          | 30 | 30 | 90 | 9   | 0.14          | 60 | 30 | 90 | 9   | 0.22          | 90 | 30 | 90 | 9   | 0.25          |
| 0 | 30 | 90 | 9.5 | 0.11          | 30 | 30 | 90 | 9.5 | 0.14          | 60 | 30 | 90 | 9.5 | 0.20          | 90 | 30 | 90 | 9.5 | 0.23          |
| 0 | 30 | 90 | 10  | 0.11          | 30 | 30 | 90 | 10  | 0.13          | 60 | 30 | 90 | 10  | 0.18          | 90 | 30 | 90 | 10  | 0.20          |
| 0 | 30 | 90 | 12  | 0.07          | 30 | 30 | 90 | 12  | 0.08          | 60 | 30 | 90 | 12  | 0.09          | 90 |    |    |     |               |

|   |    |    |     |               |    |    |    |     |               |    |    |    |     |               |    |    |    |     |               |
|---|----|----|-----|---------------|----|----|----|-----|---------------|----|----|----|-----|---------------|----|----|----|-----|---------------|
| 0 | 45 | 0  | 3.9 | 5762.69       | 30 | 45 | 0  | 3.9 | 5762.69       | 60 | 45 | 0  | 3.9 | 5762.69       | 90 | 45 | 0  | 3.9 | 5762.69       |
| 0 | 45 | 0  | 4   | 4155.95       | 30 | 45 | 0  | 4   | 4155.95       | 60 | 45 | 0  | 4   | 4155.95       | 90 | 45 | 0  | 4   | 4155.95       |
| 0 | 45 | 0  | 4.1 | 2963.04       | 30 | 45 | 0  | 4.1 | 2963.03       | 60 | 45 | 0  | 4.1 | 2963.04       | 90 | 45 | 0  | 4.1 | 2963.03       |
| 0 | 45 | 0  | 4.2 | 2084.46       | 30 | 45 | 0  | 4.2 | 2084.46       | 60 | 45 | 0  | 4.2 | 2084.46       | 90 | 45 | 0  | 4.2 | 2084.46       |
| 0 | 45 | 0  | 4.3 | 1442.81       | 30 | 45 | 0  | 4.3 | 1442.81       | 60 | 45 | 0  | 4.3 | 1442.81       | 90 | 45 | 0  | 4.3 | 1442.81       |
| 0 | 45 | 0  | 4.4 | 978.44        | 30 | 45 | 0  | 4.4 | 978.43        | 60 | 45 | 0  | 4.4 | 978.44        | 90 | 45 | 0  | 4.4 | 978.43        |
| 0 | 45 | 0  | 4.5 | 645.71        | 30 | 45 | 0  | 4.5 | 645.70        | 60 | 45 | 0  | 4.5 | 645.71        | 90 | 45 | 0  | 4.5 | 645.70        |
| 0 | 45 | 0  | 4.6 | 409.97        | 30 | 45 | 0  | 4.6 | 409.97        | 60 | 45 | 0  | 4.6 | 409.97        | 90 | 45 | 0  | 4.6 | 409.97        |
| 0 | 45 | 0  | 4.7 | 245.12        | 30 | 45 | 0  | 4.7 | 245.12        | 60 | 45 | 0  | 4.7 | 245.12        | 90 | 45 | 0  | 4.7 | 245.12        |
| 0 | 45 | 0  | 4.8 | 131.61        | 30 | 45 | 0  | 4.8 | 131.60        | 60 | 45 | 0  | 4.8 | 131.61        | 90 | 45 | 0  | 4.8 | 131.60        |
| 0 | 45 | 0  | 4.9 | 54.94         | 30 | 45 | 0  | 4.9 | 54.93         | 60 | 45 | 0  | 4.9 | 54.94         | 90 | 45 | 0  | 4.9 | 54.93         |
| 0 | 45 | 0  | 5   | 4.48          | 30 | 45 | 0  | 5   | 4.48          | 60 | 45 | 0  | 5   | 4.48          | 90 | 45 | 0  | 5   | 4.48          |
| 0 | 45 | 0  | 5.1 | -27.49        | 30 | 45 | 0  | 5.1 | -27.49        | 60 | 45 | 0  | 5.1 | -27.49        | 90 | 45 | 0  | 5.1 | -27.49        |
| 0 | 45 | 0  | 5.2 | -46.58        | 30 | 45 | 0  | 5.2 | -46.58        | 60 | 45 | 0  | 5.2 | -46.58        | 90 | 45 | 0  | 5.2 | -46.58        |
| 0 | 45 | 0  | 5.3 | -56.84        | 30 | 45 | 0  | 5.3 | -56.84        | 60 | 45 | 0  | 5.3 | -56.84        | 90 | 45 | 0  | 5.3 | -56.84        |
| 0 | 45 | 0  | 5.4 | -61.19        | 30 | 45 | 0  | 5.4 | -61.20        | 60 | 45 | 0  | 5.4 | -61.19        | 90 | 45 | 0  | 5.4 | -61.20        |
| 0 | 45 | 0  | 5.5 | <b>-61.73</b> | 30 | 45 | 0  | 5.5 | <b>-61.73</b> | 60 | 45 | 0  | 5.5 | <b>-61.73</b> | 90 | 45 | 0  | 5.5 | <b>-61.73</b> |
| 0 | 45 | 0  | 5.6 | -59.87        | 30 | 45 | 0  | 5.6 | -59.87        | 60 | 45 | 0  | 5.6 | -59.87        | 90 | 45 | 0  | 5.6 | -59.87        |
| 0 | 45 | 0  | 5.7 | -56.60        | 30 | 45 | 0  | 5.7 | -56.60        | 60 | 45 | 0  | 5.7 | -56.60        | 90 | 45 | 0  | 5.7 | -56.60        |
| 0 | 45 | 0  | 5.8 | -52.59        | 30 | 45 | 0  | 5.8 | -52.59        | 60 | 45 | 0  | 5.8 | -52.59        | 90 | 45 | 0  | 5.8 | -52.59        |
| 0 | 45 | 0  | 5.9 | -48.26        | 30 | 45 | 0  | 5.9 | -48.26        | 60 | 45 | 0  | 5.9 | -48.26        | 90 | 45 | 0  | 5.9 | -48.26        |
| 0 | 45 | 0  | 6   | -43.90        | 30 | 45 | 0  | 6   | -43.91        | 60 | 45 | 0  | 6   | -43.90        | 90 | 45 | 0  | 6   | -43.91        |
| 0 | 45 | 0  | 6.5 | -25.72        | 30 | 45 | 0  | 6.5 | -25.72        | 60 | 45 | 0  | 6.5 | -25.72        | 90 | 45 | 0  | 6.5 | -25.72        |
| 0 | 45 | 0  | 7   | -14.90        | 30 | 45 | 0  | 7   | -14.90        | 60 | 45 | 0  | 7   | -14.90        | 90 | 45 | 0  | 7   | -14.90        |
| 0 | 45 | 0  | 7.5 | -8.95         | 30 | 45 | 0  | 7.5 | -8.95         | 60 | 45 | 0  | 7.5 | -8.95         | 90 | 45 | 0  | 7.5 | -8.95         |
| 0 | 45 | 0  | 8   | -5.62         | 30 | 45 | 0  | 8   | -5.63         | 60 | 45 | 0  | 8   | -5.62         | 90 | 45 | 0  | 8   | -5.62         |
| 0 | 45 | 0  | 8.5 | -3.68         | 30 | 45 | 0  | 8.5 | -3.69         | 60 | 45 | 0  | 8.5 | -3.68         | 90 | 45 | 0  | 8.5 | -3.69         |
| 0 | 45 | 0  | 9   | -2.50         | 30 | 45 | 0  | 9   | -2.50         | 60 | 45 | 0  | 9   | -2.50         | 90 | 45 | 0  | 9   | -2.50         |
| 0 | 45 | 0  | 9.5 | -1.75         | 30 | 45 | 0  | 9.5 | -1.75         | 60 | 45 | 0  | 9.5 | -1.75         | 90 | 45 | 0  | 9.5 | -1.75         |
| 0 | 45 | 0  | 10  | -1.25         | 30 | 45 | 0  | 10  | -1.25         | 60 | 45 | 0  | 10  | -1.25         | 90 | 45 | 0  | 10  | -1.25         |
| 0 | 45 | 0  | 12  | -0.39         | 30 | 45 | 0  | 12  | -0.39         | 60 | 45 | 0  | 12  | -0.39         | 90 | 45 | 0  | 12  | -0.39         |
| 0 | 45 | 0  | 15  | -0.09         | 30 | 45 | 0  | 15  | -0.09         | 60 | 45 | 0  | 15  | -0.09         | 90 | 45 | 0  | 15  | -0.09         |
| 0 | 45 | 0  | 20  | 0.00          | 30 | 45 | 0  | 20  | 0.00          | 60 | 45 | 0  | 20  | 0.00          | 90 | 45 | 0  | 20  | 0.00          |
| 0 | 45 | 10 | 2.5 | 87284.01      | 30 | 45 | 10 | 2.5 | 92234.57      | 60 | 45 | 10 | 2.5 | 109697.62     | 90 | 45 | 10 | 2.5 | 147220.24     |
| 0 | 45 | 10 | 2.6 | 71316.54      | 30 | 45 | 10 | 2.6 | 74823.96      | 60 | 45 | 10 | 2.6 | 86429.56      | 90 | 45 | 10 | 2.6 | 108903.66     |
| 0 | 45 | 10 | 2.7 | 62932.57      | 30 | 45 | 10 | 2.7 | 65406.14      | 60 | 45 | 10 | 2.7 | 72947.36      | 90 | 45 | 10 | 2.7 | 85425.84      |
| 0 | 45 | 10 | 2.8 | 59994.56      | 30 | 45 | 10 | 2.8 | 61830.22      | 60 | 45 | 10 | 2.8 | 66416.04      | 90 | 45 | 10 | 2.8 | 71598.36      |
| 0 | 45 | 10 | 2.9 | 59100.57      | 30 | 45 | 10 | 2.9 | 61374.60      | 60 | 45 | 10 | 2.9 | 57524.16      | 90 | 45 | 10 | 2.9 | 59818.33      |
| 0 | 45 | 10 | 3   | 50870.64      | 30 | 45 | 10 | 3   | 50930.38      | 60 | 45 | 10 | 3   | 50671.92      | 90 | 45 | 10 | 3   | 49638.15      |
| 0 | 45 | 10 | 3.1 | 41885.56      | 30 | 45 | 10 | 3.1 | 41837.65      | 60 | 45 | 10 | 3.1 | 41523.07      | 90 | 45 | 10 | 3.1 | 40753.70      |
| 0 | 45 | 10 | 3.2 | 33602.12      | 30 | 45 | 10 | 3.2 | 33549.72      | 60 | 45 | 10 | 3.2 | 33313.08      | 90 | 45 | 10 | 3.2 | 32808.67      |
| 0 | 45 | 10 | 3.3 | 26454.62      | 30 | 45 | 10 | 3.3 | 26415.25      | 60 | 45 | 10 | 3.3 | 26255.14      | 90 | 45 | 10 | 3.3 | 25932.29      |
| 0 | 45 | 10 | 3.4 | 20476.17      | 30 | 45 | 10 | 3.4 | 20447.38      | 60 | 45 | 10 | 3.4 | 20336.54      | 90 | 45 | 10 | 3.4 | 20120.21      |
| 0 | 45 | 10 | 3.5 | 15647.18      | 30 | 45 | 10 | 3.5 | 15625.26      | 60 | 45 | 10 | 3.5 | 15544.11      | 90 | 45 | 10 | 3.5 | 15389.84      |
| 0 | 45 | 10 | 3.6 | 11825.66      | 30 | 45 | 10 | 3.6 | 11807.79      | 60 | 45 | 10 | 3.6 | 11744.18      | 90 | 45 | 10 | 3.6 | 11626.49      |
| 0 | 45 | 10 | 3.7 | 8847.94       | 30 | 45 | 10 | 3.7 | 8832.51       | 60 | 45 | 10 | 3.7 | 8779.44       | 90 | 45 | 10 | 3.7 | 8684.22       |
| 0 | 45 | 10 | 3.8 | 6556.65       | 30 | 45 | 10 | 3.8 | 6542.71       | 60 | 45 | 10 | 3.8 | 6496.50       | 90 | 45 | 10 | 3.8 | 6416.02       |
| 0 | 45 | 10 | 3.9 | 4812.23       | 30 | 45 | 10 | 3.9 | 4799.41       | 60 | 45 | 10 | 3.9 | 4758.13       | 90 | 45 | 10 | 3.9 | 4688.20       |
| 0 | 45 | 10 | 4   | 3496.75       | 30 | 45 | 10 | 4   | 3484.89       | 60 | 45 | 10 | 4   | 3447.61       | 90 | 45 | 10 | 4   | 3385.97       |
| 0 | 45 | 10 | 4.1 | 2513.44       | 30 | 45 | 10 | 4.1 | 2502.49       | 60 | 45 | 10 | 4.1 | 2468.73       | 90 | 45 | 10 | 4.1 | 2414.04       |
| 0 | 45 | 10 | 4.2 | 1784.69       | 30 | 45 | 10 | 4.2 | 1774.63       | 60 | 45 | 10 | 4.2 | 1744.08       | 90 | 45 | 10 | 4.2 | 1695.44       |
| 0 | 45 | 10 | 4.3 | 1249.23       | 30 | 45 | 10 | 4.3 | 1240.04       | 60 | 45 | 10 | 4.3 | 1212.49       | 90 | 45 | 10 | 4.3 | 1169.24       |
| 0 | 45 | 10 | 4.4 | 859.26        | 30 | 45 | 10 | 4.4 | 850.92        | 60 | 45 | 10 | 4.4 | 826.20        | 90 | 45 | 10 | 4.4 | 787.82        |
| 0 | 45 | 10 | 4.5 | 577.91        | 30 | 45 | 10 | 4.5 | 570.40        | 60 | 45 | 10 | 4.5 | 548.32        | 90 | 45 | 10 | 4.5 | 514.37        |
| 0 | 45 | 10 | 4.6 | 377.00        | 30 | 45 | 10 | 4.6 | 370.29        | 60 | 45 | 10 | 4.6 | 350.66        | 90 | 45 | 10 | 4.6 | 320.72        |
| 0 | 45 | 10 | 4.7 | 235.23        | 30 | 45 | 10 | 4.7 | 229.25        | 60 | 45 | 10 | 4.7 | 211.86        | 90 | 45 | 10 | 4.7 | 185.53        |
| 0 | 45 | 10 | 4.8 | 136.56        | 30 | 45 | 10 | 4.8 | 131.25        | 60 | 45 | 10 | 4.8 | 115.89        | 90 | 45 | 10 | 4.8 | 92.77         |
| 0 | 45 | 10 | 4.9 | 69.07         | 30 | 45 | 10 | 4.9 | 64.36         | 60 | 45 | 10 | 4.9 | 50.80         | 90 | 45 | 10 | 4.9 | 30.50         |
| 0 | 45 | 10 | 5   | 23.91         | 30 | 45 | 10 | 5   | 19.74         | 60 | 45 | 10 | 5   | 7.78          | 90 | 45 | 10 | 5   | -10.04        |
| 0 | 45 | 10 | 5.1 | -5.39         | 30 | 45 | 10 | 5.1 | -9.07         | 60 | 45 | 10 | 5.1 | -19.62        | 90 | 45 | 10 | 5.1 | -35.28        |
| 0 | 45 | 10 | 5.2 | -23.58        | 30 | 45 | 10 | 5.2 | -26.83        | 60 | 45 | 10 | 5.2 | -36.14        | 90 | 45 | 10 | 5.2 | -49.89        |
| 0 | 45 | 10 | 5.3 | -34.12        | 30 | 45 | 10 | 5.3 | -36.99        | 60 | 45 | 10 | 5.3 | -45.19        | 90 | 45 | 10 | 5.3 | -57.28        |
| 0 | 45 | 10 | 5.4 | -39.47        | 30 | 45 | 10 | 5.4 | -42.00        | 60 | 45 | 10 | 5.4 | -49.23        | 90 | 45 | 10 | 5.4 | <b>-59.87</b> |
| 0 | 45 | 10 | 5.5 | <b>-41.39</b> | 30 | 45 | 10 | 5.5 | <b>-43.63</b> | 60 | 45 | 10 | 5.5 | <b>-50.01</b> | 90 | 45 | 10 | 5.5 | -59.38        |
| 0 | 45 | 10 | 5.6 | -41.10        | 30 | 45 | 10 | 5.6 | -43.08        | 60 | 45 | 10 | 5.6 | -48.72        | 90 | 45 | 10 | 5.6 | -57.00        |
| 0 | 45 | 10 | 5.7 | -39.44        | 30 | 45 | 10 | 5.7 | -41.20        | 60 | 45 | 10 | 5.7 | -46.20        | 90 | 45 | 10 | 5.7 | -53.52        |
| 0 | 45 | 10 | 5.8 | -37.00        | 30 | 45 | 10 | 5.8 | -38.56        | 60 | 45 | 10 | 5.8 | -43.01        | 90 | 45 | 10 | 5.8 | -49.50        |
| 0 | 45 | 10 | 5.9 | -34.17        | 30 | 45 | 10 | 5.9 | -35.56        | 60 | 45 | 10 | 5.9 | -39.52        | 90 | 45 | 10 | 5.9 | -45.29        |
| 0 | 45 | 10 | 6   | -31.19        | 30 | 45 | 10 | 6   | -32.44        | 60 | 45 | 10 | 6   | -35.97        | 90 | 45 | 10 | 6   | -41.12        |
| 0 | 45 | 10 | 6.5 | -18.24        | 30 | 45 | 10 | 6.5 | -18.98        | 60 | 45 | 10 | 6.5 | -21.05        | 90 | 45 | 10 | 6.5 | -24.04        |
| 0 | 45 | 10 | 7   | -10.39        | 30 | 45 | 10 | 7   | -10.85        | 60 | 45 | 10 | 7   | -12.12        | 90 | 45 | 10 | 7   | -13.96        |
| 0 | 45 | 10 | 7.5 | -6.11         | 30 | 45 | 10 | 7.5 | -6.41         | 60 | 45 | 10 | 7.5 | -7.23         | 90 | 45 | 10 | 7.5 | -8.42         |
| 0 | 45 | 10 | 8   | -3.76         | 30 | 45 | 10 | 8   | -3.96         | 60 | 45 | 10 | 8   | -4.52         | 90 | 45 | 10 | 8   | -5.30         |
| 0 | 45 | 10 | 8.5 | -2.42         | 30 | 45 | 10 | 8.5 | -2.56         | 60 | 45 | 10 | 8.5 | -2.94         | 90 | 45 | 10 | 8.5 | -3.49         |
| 0 | 45 | 10 | 9   | -1.62         | 30 | 45 | 10 | 9   | -1.71         | 60 | 45 | 10 | 9   | -1.99         | 90 | 45 | 10 | 9   | -2.38         |
| 0 | 45 | 10 | 9.5 | -1.11         | 30 | 45 | 10 | 9.5 | -1.18         | 60 | 45 | 10 | 9.5 | -1.38         | 90 | 45 | 10 | 9.5 | -1.66         |
| 0 | 45 | 10 | 10  | -0.78         | 30 | 45 | 10 | 10  | -0.84         | 60 | 45 | 10 | 10  | -0.98         | 90 | 45 | 10 | 10  | -1.19         |
| 0 | 45 | 10 | 12  | -0.23         |    |    |    |     |               |    |    |    |     |               |    |    |    |     |               |



|         |     |          |          |     |          |          |     |          |          |     |          |
|---------|-----|----------|----------|-----|----------|----------|-----|----------|----------|-----|----------|
| 0 45 20 | 4   | 1987.43  | 30 45 20 | 4   | 1979.16  | 60 45 20 | 4   | 1947.33  | 90 45 20 | 4   | 1879.97  |
| 0 45 20 | 4.1 | 1433.14  | 30 45 20 | 4.1 | 1424.45  | 60 45 20 | 4.1 | 1393.01  | 90 45 20 | 4.1 | 1330.33  |
| 0 45 20 | 4.2 | 1019.20  | 30 45 20 | 4.2 | 1010.48  | 60 45 20 | 4.2 | 980.18   | 90 45 20 | 4.2 | 922.39   |
| 0 45 20 | 4.3 | 713.17   | 30 45 20 | 4.3 | 704.68   | 60 45 20 | 4.3 | 676.02   | 90 45 20 | 4.3 | 623.19   |
| 0 45 20 | 4.4 | 489.25   | 30 45 20 | 4.4 | 481.15   | 60 45 20 | 4.4 | 454.43   | 90 45 20 | 4.4 | 406.48   |
| 0 45 20 | 4.5 | 327.22   | 30 45 20 | 4.5 | 319.61   | 60 45 20 | 4.5 | 294.94   | 90 45 20 | 4.5 | 251.67   |
| 0 45 20 | 4.6 | 211.35   | 30 45 20 | 4.6 | 204.28   | 60 45 20 | 4.6 | 181.70   | 90 45 20 | 4.6 | 142.82   |
| 0 45 20 | 4.7 | 129.59   | 30 45 20 | 4.7 | 123.08   | 60 45 20 | 4.7 | 102.55   | 90 45 20 | 4.7 | 67.75    |
| 0 45 20 | 4.8 | 72.77    | 30 45 20 | 4.8 | 66.83    | 60 45 20 | 4.8 | 48.27    | 90 45 20 | 4.8 | 17.22    |
| 0 45 20 | 4.9 | 34.00    | 30 45 20 | 4.9 | 28.63    | 60 45 20 | 4.9 | 11.96    | 90 45 20 | 4.9 | -15.68   |
| 0 45 20 | 5   | 8.20     | 30 45 20 | 5   | 3.37     | 60 45 20 | 5   | -11.56   | 90 45 20 | 5   | -36.10   |
| 0 45 20 | 5.1 | -8.41    | 30 45 20 | 5.1 | -12.74   | 60 45 20 | 5.1 | -26.06   | 90 45 20 | 5.1 | -47.83   |
| 0 45 20 | 5.2 | -18.56   | 30 45 20 | 5.2 | -22.43   | 60 45 20 | 5.2 | -34.31   | 90 45 20 | 5.2 | -53.61   |
| 0 45 20 | 5.3 | -24.23   | 30 45 20 | 5.3 | -27.71   | 60 45 20 | 5.3 | -38.30   | 90 45 20 | 5.3 | -55.42   |
| 0 45 20 | 5.4 | -26.87   | 30 45 20 | 5.4 | -29.99   | 60 45 20 | 5.4 | -39.45   | 90 45 20 | 5.4 | -54.65   |
| 0 45 20 | 5.5 | -27.51   | 30 45 20 | 5.5 | -30.31   | 60 45 20 | 5.5 | -38.77   | 90 45 20 | 5.5 | -52.29   |
| 0 45 20 | 5.6 | -26.87   | 30 45 20 | 5.6 | -29.39   | 60 45 20 | 5.6 | -36.97   | 90 45 20 | 5.6 | -49.01   |
| 0 45 20 | 5.7 | -25.46   | 30 45 20 | 5.7 | -27.73   | 60 45 20 | 5.7 | -34.53   | 90 45 20 | 5.7 | -45.28   |
| 0 45 20 | 5.8 | -23.64   | 30 45 20 | 5.8 | -25.68   | 60 45 20 | 5.8 | -31.80   | 90 45 20 | 5.8 | -41.41   |
| 0 45 20 | 5.9 | -21.63   | 30 45 20 | 5.9 | -23.48   | 60 45 20 | 5.9 | -28.98   | 90 45 20 | 5.9 | -37.60   |
| 0 45 20 | 6   | -19.59   | 30 45 20 | 6   | -21.25   | 60 45 20 | 6   | -26.22   | 90 45 20 | 6   | -33.96   |
| 0 45 20 | 6.5 | -11.03   | 30 45 20 | 6.5 | -12.06   | 60 45 20 | 6.5 | -15.10   | 90 45 20 | 6.5 | -19.76   |
| 0 45 20 | 7   | -6.03    | 30 45 20 | 7   | -6.69    | 60 45 20 | 7   | -8.63    | 90 45 20 | 7   | -11.57   |
| 0 45 20 | 7.5 | -3.39    | 30 45 20 | 7.5 | -3.83    | 60 45 20 | 7.5 | -5.11    | 90 45 20 | 7.5 | -7.04    |
| 0 45 20 | 8   | -1.99    | 30 45 20 | 8   | -2.29    | 60 45 20 | 8   | -3.17    | 90 45 20 | 8   | -4.48    |
| 0 45 20 | 8.5 | -1.22    | 30 45 20 | 8.5 | -1.44    | 60 45 20 | 8.5 | -2.05    | 90 45 20 | 8.5 | -2.97    |
| 0 45 20 | 9   | -0.77    | 30 45 20 | 9   | -0.93    | 60 45 20 | 9   | -1.37    | 90 45 20 | 9   | -2.03    |
| 0 45 20 | 9.5 | -0.50    | 30 45 20 | 9.5 | -0.62    | 60 45 20 | 9.5 | -0.95    | 90 45 20 | 9.5 | -1.43    |
| 0 45 20 | 10  | -0.34    | 30 45 20 | 10  | -0.42    | 60 45 20 | 10  | -0.67    | 90 45 20 | 10  | -1.03    |
| 0 45 20 | 12  | -0.08    | 30 45 20 | 12  | -0.11    | 60 45 20 | 12  | -0.20    | 90 45 20 | 12  | -0.32    |
| 0 45 20 | 15  | -0.01    | 30 45 20 | 15  | -0.02    | 60 45 20 | 15  | -0.04    | 90 45 20 | 15  | -0.07    |
| 0 45 20 | 20  | 0.00     | 30 45 20 | 20  | 0.00     | 60 45 20 | 20  | 0.00     | 90 45 20 | 20  | 0.00     |
| 0 45 30 | 2.5 | 25970.05 | 30 45 30 | 2.5 | 26367.84 | 60 45 30 | 2.5 | 27524.58 | 90 45 30 | 2.5 | 29645.22 |
| 0 45 30 | 2.6 | 22695.00 | 30 45 30 | 2.6 | 23040.02 | 60 45 30 | 2.6 | 23974.35 | 90 45 30 | 2.6 | 25316.99 |
| 0 45 30 | 2.7 | 19624.27 | 30 45 30 | 2.7 | 19896.19 | 60 45 30 | 2.7 | 20580.91 | 90 45 30 | 2.7 | 21409.32 |
| 0 45 30 | 2.8 | 16723.59 | 30 45 30 | 2.8 | 16927.11 | 60 45 30 | 2.8 | 17413.48 | 90 45 30 | 2.8 | 17944.92 |
| 0 45 30 | 2.9 | 14022.76 | 30 45 30 | 2.9 | 14171.38 | 60 45 30 | 2.9 | 14512.88 | 90 45 30 | 2.9 | 14836.78 |
| 0 45 30 | 3   | 11567.79 | 30 45 30 | 3   | 11675.33 | 60 45 30 | 3   | 11914.56 | 90 45 30 | 3   | 12111.49 |
| 0 45 30 | 3.1 | 9394.18  | 30 45 30 | 3.1 | 9471.70  | 60 45 30 | 3.1 | 9638.88  | 90 45 30 | 3.1 | 9756.26  |
| 0 45 30 | 3.2 | 7517.36  | 30 45 30 | 3.2 | 7572.96  | 60 45 30 | 3.2 | 7688.48  | 90 45 30 | 3.2 | 7753.58  |
| 0 45 30 | 3.3 | 5933.02  | 30 45 30 | 3.3 | 5972.45  | 60 45 30 | 3.3 | 6050.19  | 90 45 30 | 3.3 | 6079.17  |
| 0 45 30 | 3.4 | 4622.08  | 30 45 30 | 3.4 | 4649.45  | 60 45 30 | 3.4 | 4699.14  | 90 45 30 | 3.4 | 4702.39  |
| 0 45 30 | 3.5 | 3556.30  | 30 45 30 | 3.5 | 3574.61  | 60 45 30 | 3.5 | 3603.43  | 90 45 30 | 3.5 | 3588.23  |
| 0 45 30 | 3.6 | 2703.33  | 30 45 30 | 3.6 | 2714.85  | 60 45 30 | 3.6 | 2728.24  | 90 45 30 | 3.6 | 2700.09  |
| 0 45 30 | 3.7 | 2030.26  | 30 45 30 | 3.7 | 2036.73  | 60 45 30 | 3.7 | 2038.89  | 90 45 30 | 3.7 | 2002.08  |
| 0 45 30 | 3.8 | 1505.98  | 30 45 30 | 3.8 | 1508.73  | 60 45 30 | 3.8 | 1502.92  | 90 45 30 | 3.8 | 1460.82  |
| 0 45 30 | 3.9 | 1102.46  | 30 45 30 | 3.9 | 1102.56  | 60 45 30 | 3.9 | 1091.27  | 90 45 30 | 3.9 | 1046.53  |
| 0 45 30 | 4   | 795.44   | 30 45 30 | 4   | 793.68   | 60 45 30 | 4   | 778.86   | 90 45 30 | 4   | 733.48   |
| 0 45 30 | 4.1 | 564.49   | 30 45 30 | 4.1 | 561.47   | 60 45 30 | 4.1 | 544.58   | 90 45 30 | 4.1 | 499.98   |
| 0 45 30 | 4.2 | 392.76   | 30 45 30 | 4.2 | 388.94   | 60 45 30 | 4.2 | 371.04   | 90 45 30 | 4.2 | 328.20   |
| 0 45 30 | 4.3 | 266.63   | 30 45 30 | 4.3 | 262.33   | 60 45 30 | 4.3 | 244.19   | 90 45 30 | 4.3 | 203.71   |
| 0 45 30 | 4.4 | 175.16   | 30 45 30 | 4.4 | 170.65   | 60 45 30 | 4.4 | 152.83   | 90 45 30 | 4.4 | 115.06   |
| 0 45 30 | 4.5 | 109.73   | 30 45 30 | 4.5 | 105.20   | 60 45 30 | 4.5 | 88.11    | 90 45 30 | 4.5 | 53.22    |
| 0 45 30 | 4.6 | 63.62    | 30 45 30 | 4.6 | 59.22    | 60 45 30 | 4.6 | 43.11    | 90 45 30 | 4.6 | 11.17    |
| 0 45 30 | 4.7 | 31.70    | 30 45 30 | 4.7 | 27.52    | 60 45 30 | 4.7 | 12.55    | 90 45 30 | 4.7 | -16.49   |
| 0 45 30 | 4.8 | 10.13    | 30 45 30 | 4.8 | 6.22     | 60 45 30 | 4.8 | -7.57    | 90 45 30 | 4.8 | -33.85   |
| 0 45 30 | 4.9 | -3.97    | 30 45 30 | 4.9 | -7.60    | 60 45 30 | 4.9 | -20.23   | 90 45 30 | 4.9 | -43.94   |
| 0 45 30 | 5   | -12.73   | 30 45 30 | 5   | -16.09   | 60 45 30 | 5   | -27.62   | 90 45 30 | 5   | -48.97   |
| 0 45 30 | 5.1 | -17.74   | 30 45 30 | 5.1 | -20.84   | 60 45 30 | 5.1 | -31.34   | 90 45 30 | 5.1 | -50.56   |
| 0 45 30 | 5.2 | -20.17   | 30 45 30 | 5.2 | -23.02   | 60 45 30 | 5.2 | -32.59   | 90 45 30 | 5.2 | -49.88   |
| 0 45 30 | 5.3 | -20.87   | 30 45 30 | 5.3 | -23.49   | 60 45 30 | 5.3 | -32.20   | 90 45 30 | 5.3 | -47.77   |
| 0 45 30 | 5.4 | -20.45   | 30 45 30 | 5.4 | -22.86   | 60 45 30 | 5.4 | -30.80   | 90 45 30 | 5.4 | -44.82   |
| 0 45 30 | 5.5 | -19.37   | 30 45 30 | 5.5 | -21.58   | 60 45 30 | 5.5 | -28.81   | 90 45 30 | 5.5 | -41.45   |
| 0 45 30 | 5.6 | -17.90   | 30 45 30 | 5.6 | -19.94   | 60 45 30 | 5.6 | -26.53   | 90 45 30 | 5.6 | -37.94   |
| 0 45 30 | 5.7 | -16.28   | 30 45 30 | 5.7 | -18.15   | 60 45 30 | 5.7 | -24.15   | 90 45 30 | 5.7 | -34.47   |
| 0 45 30 | 5.8 | -14.61   | 30 45 30 | 5.8 | -16.33   | 60 45 30 | 5.8 | -21.80   | 90 45 30 | 5.8 | -31.15   |
| 0 45 30 | 5.9 | -13.00   | 30 45 30 | 5.9 | -14.58   | 60 45 30 | 5.9 | -19.57   | 90 45 30 | 5.9 | -28.04   |
| 0 45 30 | 6   | -11.49   | 30 45 30 | 6   | -12.94   | 60 45 30 | 6   | -17.50   | 90 45 30 | 6   | -25.19   |
| 0 45 30 | 6.5 | -5.85    | 30 45 30 | 6.5 | -6.81    | 60 45 30 | 6.5 | -9.75    | 90 45 30 | 6.5 | -14.60   |
| 0 45 30 | 7   | -2.87    | 30 45 30 | 7   | -3.52    | 60 45 30 | 7   | -5.48    | 90 45 30 | 7   | -8.64    |
| 0 45 30 | 7.5 | -1.41    | 30 45 30 | 7.5 | -1.85    | 60 45 30 | 7.5 | -3.20    | 90 45 30 | 7.5 | -5.34    |
| 0 45 30 | 8   | -0.69    | 30 45 30 | 8   | -1.00    | 60 45 30 | 8   | -1.95    | 90 45 30 | 8   | -3.44    |
| 0 45 30 | 8.5 | -0.32    | 30 45 30 | 8.5 | -0.55    | 60 45 30 | 8.5 | -1.24    | 90 45 30 | 8.5 | -2.30    |
| 0 45 30 | 9   | -0.14    | 30 45 30 | 9   | -0.31    | 60 45 30 | 9   | -0.81    | 90 45 30 | 9   | -1.58    |
| 0 45 30 | 9.5 | -0.04    | 30 45 30 | 9.5 | -0.17    | 60 45 30 | 9.5 | -0.54    | 90 45 30 | 9.5 | -1.12    |
| 0 45 30 | 10  | 0.01     | 30 45 30 | 10  | -0.09    | 60 45 30 | 10  | -0.37    | 90 45 30 | 10  | -0.81    |
| 0 45 30 | 12  | 0.04     | 30 45 30 | 12  | 0.01     | 60 45 30 | 12  | -0.10    | 90 45 30 | 12  | -0.26    |
| 0 45 30 | 15  | 0.02     | 30 45 30 | 15  | 0.01     | 60 45 30 | 15  | -0.02    | 90 45 30 | 15  | -0.06    |
| 0 45 30 | 20  | 0.00     | 30 45 30 | 20  | 0.00     | 60 45 30 | 20  | 0.00     | 90 45 30 | 20  | 0.00     |
| 0 45 40 | 2.5 | 14353.59 | 30 45 40 | 2.5 | 14455.28 | 60 45 40 | 2.5 | 14790.71 | 90 45 40 | 2.5 | 15441.54 |
| 0 45 40 | 2.6 | 11583.88 | 30 45 40 | 2.6 | 11684.00 | 60 45 40 | 2.6 | 11986.39 | 90 45 40 | 2.6 | 12502.23 |
| 0 45 40 | 2.7 | 9305.21  | 30 45 40 | 2.7 | 9395.87  | 60 45 40 | 2.7 | 9654.48  | 90 45 40 | 2.7 | 10053.30 |
| 0 45 40 | 2.8 | 7429.64  | 30 45 40 | 2.8 | 7507.73  | 60 45 40 | 2.8 | 7720.91  | 90 45 40 | 2.8 | 8022.28  |
| 0 45 40 | 2.9 | 5889.34  | 30 45 40 | 2.9 | 5954.31  | 60 45 40 | 2.9 | 6125.13  | 90 45 40 | 2.9 | 6347.39  |
| 0 45 40 | 3   | 4630.21  | 30 45 40 | 3   | 4682.85  | 60 45 40 | 3   | 4816.39  | 90 45 40 | 3   | 4975.59  |
| 0 45 40 | 3.1 | 3607.40  | 30 45 40 | 3.1 | 3649.14  | 60 45 40 | 3.1 | 3751.08  | 90 45 40 | 3.1 | 3860.73  |
| 0 45 40 | 3.2 | 2782.93  | 30 45 40 | 3.2 | 2815.42  | 60 45 40 | 3.2 | 2891.29  | 90 45 40 | 3.2 | 2962.53  |
| 0 45 40 | 3.3 | 2124.11  | 30 45 40 | 3.3 | 2148.97  | 60 45 40 | 3.3 | 2203.79  | 90 45 40 | 3.3 | 2245.66  |
| 0 45 40 | 3.4 | 1602.71  | 30 45 40 | 3.4 | 1621.37  | 60 45 40 | 3.4 | 1659.48  | 90 45 40 | 3.4 | 1679.25  |
| 0 45 40 | 3.5 | 1194.33  | 30 45 40 | 3.5 | 1208.01  | 60 45 40 | 3.5 | 1233.01  | 90 45 40 | 3.5 | 1236.46  |
| 0 45 40 | 3.6 | 877.96   | 30 45 40 | 3.6 | 887.63   | 60 45 40 | 3.6 | 902.46   | 90 45 40 | 3.6 | 894.18   |
| 0 45 40 | 3.7 | 635.51   | 30 45 40 | 3.7 | 641.99   | 60 45 40 | 3.7 | 649.05   | 90 45 40 | 3.7 | 632.69   |
| 0 45 40 | 3.8 | 451.70   | 30 45 40 | 3.8 | 455.68   | 60 45 40 | 3.8 | 456.97   | 90 45 40 | 3.8 | 435.37   |
| 0 45 40 | 3.9 | 313.88   | 30 45 40 | 3.9 | 315.93   | 60 45 40 | 3.9 | 313.07   | 90 45 40 | 3.9 | 288.39   |
| 0 45 40 | 4   | 211.72   | 30 45 40 | 4   | 212.38   | 60 45 40 | 4   | 206.68   | 90 45 40 | 4   | 180.48   |

|   |    |    |     |         |    |    |    |     |         |    |    |    |     |         |    |    |    |     |         |
|---|----|----|-----|---------|----|----|----|-----|---------|----|----|----|-----|---------|----|----|----|-----|---------|
| 0 | 45 | 40 | 4.1 | 137.05  | 30 | 45 | 40 | 4.1 | 136.69  | 60 | 45 | 40 | 4.1 | 129.16  | 90 | 45 | 40 | 4.1 | 102.58  |
| 0 | 45 | 40 | 4.2 | 83.32   | 30 | 45 | 40 | 4.2 | 82.28   | 60 | 45 | 40 | 4.2 | 73.65   | 90 | 45 | 40 | 4.2 | 47.47   |
| 0 | 45 | 40 | 4.3 | 45.39   | 30 | 45 | 40 | 4.3 | 43.90   | 60 | 45 | 40 | 4.3 | 34.72   | 90 | 45 | 40 | 4.3 | 9.48    |
| 0 | 45 | 40 | 4.4 | 19.23   | 30 | 45 | 40 | 4.4 | 17.47   | 60 | 45 | 40 | 4.4 | 8.14    | 90 | 45 | 40 | 4.4 | -15.83  |
| 0 | 45 | 40 | 4.5 | 1.73    | 30 | 45 | 40 | 4.5 | -0.18   | 60 | 45 | 40 | 4.5 | -9.41   | 90 | 45 | 40 | 4.5 | -31.91  |
| 0 | 45 | 40 | 4.6 | -9.49   | 30 | 45 | 40 | 4.6 | -11.47  | 60 | 45 | 40 | 4.6 | -20.42  | 90 | 45 | 40 | 4.6 | -41.36  |
| 0 | 45 | 40 | 4.7 | -16.24  | 30 | 45 | 40 | 4.7 | -18.23  | 60 | 45 | 40 | 4.7 | -26.80  | 90 | 45 | 40 | 4.7 | -46.17  |
| 0 | 45 | 40 | 4.8 | -19.86  | 30 | 45 | 40 | 4.8 | -21.82  | 60 | 45 | 40 | 4.8 | -29.95  | 90 | 45 | 40 | 4.8 | -47.79  |
| 0 | 45 | 40 | 4.9 | -21.32  | 30 | 45 | 40 | 4.9 | -23.23  | 60 | 45 | 40 | 4.9 | -30.89  | 90 | 45 | 40 | 4.9 | -47.26  |
| 0 | 45 | 40 | 5   | -21.36  | 30 | 45 | 40 | 5   | -23.20  | 60 | 45 | 40 | 5   | -30.38  | 90 | 45 | 40 | 5   | -45.37  |
| 0 | 45 | 40 | 5.1 | -20.50  | 30 | 45 | 40 | 5.1 | -22.26  | 60 | 45 | 40 | 5.1 | -28.95  | 90 | 45 | 40 | 5.1 | -42.67  |
| 0 | 45 | 40 | 5.2 | -19.09  | 30 | 45 | 40 | 5.2 | -20.76  | 60 | 45 | 40 | 5.2 | -27.00  | 90 | 45 | 40 | 5.2 | -39.54  |
| 0 | 45 | 40 | 5.3 | -17.41  | 30 | 45 | 40 | 5.3 | -18.99  | 60 | 45 | 40 | 5.3 | -24.78  | 90 | 45 | 40 | 5.3 | -36.24  |
| 0 | 45 | 40 | 5.4 | -15.62  | 30 | 45 | 40 | 5.4 | -17.11  | 60 | 45 | 40 | 5.4 | -22.49  | 90 | 45 | 40 | 5.4 | -32.96  |
| 0 | 45 | 40 | 5.5 | -13.84  | 30 | 45 | 40 | 5.5 | -15.24  | 60 | 45 | 40 | 5.5 | -20.22  | 90 | 45 | 40 | 5.5 | -29.80  |
| 0 | 45 | 40 | 5.6 | -12.14  | 30 | 45 | 40 | 5.6 | -13.46  | 60 | 45 | 40 | 5.6 | -18.07  | 90 | 45 | 40 | 5.6 | -26.83  |
| 0 | 45 | 40 | 5.7 | -10.57  | 30 | 45 | 40 | 5.7 | -11.80  | 60 | 45 | 40 | 5.7 | -16.06  | 90 | 45 | 40 | 5.7 | -24.08  |
| 0 | 45 | 40 | 5.8 | -9.14   | 30 | 45 | 40 | 5.8 | -10.29  | 60 | 45 | 40 | 5.8 | -14.23  | 90 | 45 | 40 | 5.8 | -21.58  |
| 0 | 45 | 40 | 5.9 | -7.86   | 30 | 45 | 40 | 5.9 | -8.93   | 60 | 45 | 40 | 5.9 | -12.58  | 90 | 45 | 40 | 5.9 | -19.32  |
| 0 | 45 | 40 | 6   | -6.73   | 30 | 45 | 40 | 6   | -7.73   | 60 | 45 | 40 | 6   | -11.11  | 90 | 45 | 40 | 6   | -17.28  |
| 0 | 45 | 40 | 6.5 | -2.90   | 30 | 45 | 40 | 6.5 | -3.61   | 60 | 45 | 40 | 6.5 | -5.92   | 90 | 45 | 40 | 6.5 | -10.01  |
| 0 | 45 | 40 | 7   | -1.10   | 30 | 45 | 40 | 7   | -1.60   | 60 | 45 | 40 | 7   | -3.21   | 90 | 45 | 40 | 7   | -5.99   |
| 0 | 45 | 40 | 7.5 | -0.29   | 30 | 45 | 40 | 7.5 | -0.66   | 60 | 45 | 40 | 7.5 | -1.80   | 90 | 45 | 40 | 7.5 | -3.74   |
| 0 | 45 | 40 | 8   | 0.05    | 30 | 45 | 40 | 8   | -0.22   | 60 | 45 | 40 | 8   | -1.05   | 90 | 45 | 40 | 8   | -2.43   |
| 0 | 45 | 40 | 8.5 | 0.18    | 30 | 45 | 40 | 8.5 | -0.01   | 60 | 45 | 40 | 8.5 | -0.63   | 90 | 45 | 40 | 8.5 | -1.64   |
| 0 | 45 | 40 | 9   | 0.23    | 30 | 45 | 40 | 9   | 0.08    | 60 | 45 | 40 | 9   | -0.38   | 90 | 45 | 40 | 9   | -1.13   |
| 0 | 45 | 40 | 9.5 | 0.23    | 30 | 45 | 40 | 9.5 | 0.11    | 60 | 45 | 40 | 9.5 | -0.24   | 90 | 45 | 40 | 9.5 | -0.80   |
| 0 | 45 | 40 | 10  | 0.21    | 30 | 45 | 40 | 10  | 0.12    | 60 | 45 | 40 | 10  | -0.14   | 90 | 45 | 40 | 10  | -0.58   |
| 0 | 45 | 40 | 12  | 0.12    | 30 | 45 | 40 | 12  | 0.08    | 60 | 45 | 40 | 12  | -0.02   | 90 | 45 | 40 | 12  | -0.18   |
| 0 | 45 | 40 | 15  | 0.04    | 30 | 45 | 40 | 15  | 0.03    | 60 | 45 | 40 | 15  | 0.00    | 90 | 45 | 40 | 15  | -0.04   |
| 0 | 45 | 40 | 20  | 0.00    | 30 | 45 | 40 | 20  | 0.00    | 60 | 45 | 40 | 20  | 0.00    | 90 | 45 | 40 | 20  | 0.00    |
| 0 | 45 | 50 | 2.5 | 7233.88 | 30 | 45 | 50 | 2.5 | 7269.58 | 60 | 45 | 50 | 2.5 | 7405.17 | 90 | 45 | 50 | 2.5 | 7702.77 |
| 0 | 45 | 50 | 2.6 | 5509.23 | 30 | 45 | 50 | 2.6 | 5546.43 | 60 | 45 | 50 | 2.6 | 5670.92 | 90 | 45 | 50 | 2.6 | 5910.52 |
| 0 | 45 | 50 | 2.7 | 4173.79 | 30 | 45 | 50 | 2.7 | 4209.12 | 60 | 45 | 50 | 2.7 | 4317.85 | 90 | 45 | 50 | 2.7 | 4505.57 |
| 0 | 45 | 50 | 2.8 | 3142.44 | 30 | 45 | 50 | 2.8 | 3174.17 | 60 | 45 | 50 | 2.8 | 3265.67 | 90 | 45 | 50 | 2.8 | 3408.71 |
| 0 | 45 | 50 | 2.9 | 2348.40 | 30 | 45 | 50 | 2.9 | 2375.83 | 60 | 45 | 50 | 2.9 | 2450.57 | 90 | 45 | 50 | 2.9 | 2556.35 |
| 0 | 45 | 50 | 3   | 1739.43 | 30 | 45 | 50 | 3   | 1762.49 | 60 | 45 | 50 | 3   | 1822.00 | 90 | 45 | 50 | 3   | 1897.44 |
| 0 | 45 | 50 | 3.1 | 1274.53 | 30 | 45 | 50 | 3.1 | 1293.50 | 60 | 45 | 50 | 3.1 | 1339.78 | 90 | 45 | 50 | 3.1 | 1391.09 |
| 0 | 45 | 50 | 3.2 | 921.55  | 30 | 45 | 50 | 3.2 | 936.90  | 60 | 45 | 50 | 3.2 | 972.07  | 90 | 45 | 50 | 3.2 | 1004.55 |
| 0 | 45 | 50 | 3.3 | 655.34  | 30 | 45 | 50 | 3.3 | 667.62  | 60 | 45 | 50 | 3.3 | 693.62  | 90 | 45 | 50 | 3.3 | 711.70  |
| 0 | 45 | 50 | 3.4 | 456.33  | 30 | 45 | 50 | 3.4 | 465.98  | 60 | 45 | 50 | 3.4 | 484.53  | 90 | 45 | 50 | 3.4 | 491.79  |
| 0 | 45 | 50 | 3.5 | 309.13  | 30 | 45 | 50 | 3.5 | 316.54  | 60 | 45 | 50 | 3.5 | 329.10  | 90 | 45 | 50 | 3.5 | 328.41  |
| 0 | 45 | 50 | 3.6 | 201.61  | 30 | 45 | 50 | 3.6 | 207.13  | 60 | 45 | 50 | 3.6 | 214.93  | 90 | 45 | 50 | 3.6 | 208.55  |
| 0 | 45 | 50 | 3.7 | 124.19  | 30 | 45 | 50 | 3.7 | 128.14  | 60 | 45 | 50 | 3.7 | 132.24  | 90 | 45 | 50 | 3.7 | 121.93  |
| 0 | 45 | 50 | 3.8 | 69.33   | 30 | 45 | 50 | 3.8 | 72.03   | 60 | 45 | 50 | 3.8 | 73.30   | 90 | 45 | 50 | 3.8 | 60.41   |
| 0 | 45 | 50 | 3.9 | 31.20   | 30 | 45 | 50 | 3.9 | 32.91   | 60 | 45 | 50 | 3.9 | 32.11   | 90 | 45 | 50 | 3.9 | 17.65   |
| 0 | 45 | 50 | 4   | 5.35    | 30 | 45 | 50 | 4   | 6.33    | 60 | 45 | 50 | 4   | 4.04    | 90 | 45 | 50 | 4   | -11.20  |
| 0 | 45 | 50 | 4.1 | -11.52  | 30 | 45 | 50 | 4.1 | -11.09  | 60 | 45 | 50 | 4.1 | -14.40  | 90 | 45 | 50 | 4.1 | -29.86  |
| 0 | 45 | 50 | 4.2 | -21.89  | 30 | 45 | 50 | 4.2 | -21.88  | 60 | 45 | 50 | 4.2 | -25.85  | 90 | 45 | 50 | 4.2 | -41.11  |
| 0 | 45 | 50 | 4.3 | -27.66  | 30 | 45 | 50 | 4.3 | -27.94  | 60 | 45 | 50 | 4.3 | -32.32  | 90 | 45 | 50 | 4.3 | -47.12  |
| 0 | 45 | 50 | 4.4 | -30.23  | 30 | 45 | 50 | 4.4 | -30.72  | 60 | 45 | 50 | 4.4 | -35.30  | 90 | 45 | 50 | 4.4 | -49.47  |
| 0 | 45 | 50 | 4.5 | -30.65  | 30 | 45 | 50 | 4.5 | -31.28  | 60 | 45 | 50 | 4.5 | -35.93  | 90 | 45 | 50 | 4.5 | -49.35  |
| 0 | 45 | 50 | 4.6 | -29.66  | 30 | 45 | 50 | 4.6 | -30.40  | 60 | 45 | 50 | 4.6 | -35.02  | 90 | 45 | 50 | 4.6 | -47.65  |
| 0 | 45 | 50 | 4.7 | -27.84  | 30 | 45 | 50 | 4.7 | -28.63  | 60 | 45 | 50 | 4.7 | -33.15  | 90 | 45 | 50 | 4.7 | -44.97  |
| 0 | 45 | 50 | 4.8 | -25.54  | 30 | 45 | 50 | 4.8 | -26.38  | 60 | 45 | 50 | 4.8 | -30.75  | 90 | 45 | 50 | 4.8 | -41.76  |
| 0 | 45 | 50 | 4.9 | -23.04  | 30 | 45 | 50 | 4.9 | -23.90  | 60 | 45 | 50 | 4.9 | -28.09  | 90 | 45 | 50 | 4.9 | -38.33  |
| 0 | 45 | 50 | 5   | -20.52  | 30 | 45 | 50 | 5   | -21.37  | 60 | 45 | 50 | 5   | -25.38  | 90 | 45 | 50 | 5   | -34.87  |
| 0 | 45 | 50 | 5.1 | -18.08  | 30 | 45 | 50 | 5.1 | -18.92  | 60 | 45 | 50 | 5.1 | -22.72  | 90 | 45 | 50 | 5.1 | -31.51  |
| 0 | 45 | 50 | 5.2 | -15.78  | 30 | 45 | 50 | 5.2 | -16.61  | 60 | 45 | 50 | 5.2 | -20.21  | 90 | 45 | 50 | 5.2 | -28.34  |
| 0 | 45 | 50 | 5.3 | -13.68  | 30 | 45 | 50 | 5.3 | -14.48  | 60 | 45 | 50 | 5.3 | -17.88  | 90 | 45 | 50 | 5.3 | -25.40  |
| 0 | 45 | 50 | 5.4 | -11.78  | 30 | 45 | 50 | 5.4 | -12.56  | 60 | 45 | 50 | 5.4 | -15.75  | 90 | 45 | 50 | 5.4 | -22.71  |
| 0 | 45 | 50 | 5.5 | -10.09  | 30 | 45 | 50 | 5.5 | -10.83  | 60 | 45 | 50 | 5.5 | -13.84  | 90 | 45 | 50 | 5.5 | -20.27  |
| 0 | 45 | 50 | 5.6 | -8.60   | 30 | 45 | 50 | 5.6 | -9.31   | 60 | 45 | 50 | 5.6 | -12.12  | 90 | 45 | 50 | 5.6 | -18.08  |
| 0 | 45 | 50 | 5.7 | -7.29   | 30 | 45 | 50 | 5.7 | -7.96   | 60 | 45 | 50 | 5.7 | -10.61  | 90 | 45 | 50 | 5.7 | -16.11  |
| 0 | 45 | 50 | 5.8 | -6.15   | 30 | 45 | 50 | 5.8 | -6.79   | 60 | 45 | 50 | 5.8 | -9.27   | 90 | 45 | 50 | 5.8 | -14.37  |
| 0 | 45 | 50 | 5.9 | -5.16   | 30 | 45 | 50 | 5.9 | -5.77   | 60 | 45 | 50 | 5.9 | -8.09   | 90 | 45 | 50 | 5.9 | -12.82  |
| 0 | 45 | 50 | 6   | -4.31   | 30 | 45 | 50 | 6   | -4.89   | 60 | 45 | 50 | 6   | -7.06   | 90 | 45 | 50 | 6   | -11.44  |
| 0 | 45 | 50 | 6.5 | -1.57   | 30 | 45 | 50 | 6.5 | -2.01   | 60 | 45 | 50 | 6.5 | -3.58   | 90 | 45 | 50 | 6.5 | -6.61   |
| 0 | 45 | 50 | 7   | -0.36   | 30 | 45 | 50 | 7   | -0.69   | 60 | 45 | 50 | 7   | -1.84   | 90 | 45 | 50 | 7   | -3.98   |
| 0 | 45 | 50 | 7.5 | 0.14    | 30 | 45 | 50 | 7.5 | -0.11   | 60 | 45 | 50 | 7.5 | -0.96   | 90 | 45 | 50 | 7.5 | -2.50   |
| 0 | 45 | 50 | 8   | 0.32    | 30 | 45 | 50 | 8   | 0.13    | 60 | 45 | 50 | 8   | -0.50   | 90 | 45 | 50 | 8   | -1.62   |
| 0 | 45 | 50 | 8.5 | 0.37    | 30 | 45 | 50 | 8.5 | 0.23    | 60 | 45 | 50 | 8.5 | -0.25   | 90 | 45 | 50 | 8.5 | -1.09   |
| 0 | 45 | 50 | 9   | 0.36    | 30 | 45 | 50 | 9   | 0.25    | 60 | 45 | 50 | 9   | -0.11   | 90 | 45 | 50 | 9   | -0.75   |
| 0 | 45 | 50 | 9.5 | 0.33    | 30 | 45 | 50 | 9.5 | 0.24    | 60 | 45 | 50 | 9.5 | -0.04   | 90 | 45 | 50 | 9.5 | -0.52   |
| 0 | 45 | 50 | 10  | 0.29    | 30 | 45 | 50 | 10  | 0.22    | 60 | 45 | 50 | 10  | 0.00    | 90 | 45 | 50 | 10  | -0.38   |
| 0 | 45 | 50 | 12  | 0.15    | 30 | 45 | 50 | 12  | 0.12    | 60 | 45 | 50 | 12  | 0.03    | 90 | 45 | 50 | 12  | -0.11   |
| 0 | 45 | 50 | 15  | 0.05    | 30 | 45 | 50 | 15  | 0.04    | 60 | 45 | 50 | 15  | 0.02    | 90 | 45 | 50 | 15  | -0.02   |
| 0 | 45 | 50 | 20  | 0.00    | 30 | 45 | 50 | 20  | 0.00    | 60 | 45 | 50 | 20  | 0.00    | 90 | 45 | 50 | 20  | 0.00    |
| 0 | 45 | 60 |     |         |    |    |    |     |         |    |    |    |     |         |    |    |    |     |         |

|         |     |                |          |     |                |          |     |               |          |     |               |
|---------|-----|----------------|----------|-----|----------------|----------|-----|---------------|----------|-----|---------------|
| 0 45 60 | 4.2 | -45.07         | 30 45 60 | 4.2 | -44.66         | 60 45 60 | 4.2 | -46.33        | 90 45 60 | 4.2 | -55.22        |
| 0 45 60 | 4.3 | -41.69         | 30 45 60 | 4.3 | -41.45         | 60 45 60 | 4.3 | -43.32        | 90 45 60 | 4.3 | -51.87        |
| 0 45 60 | 4.4 | -37.88         | 30 45 60 | 4.4 | -37.77         | 60 45 60 | 4.4 | -39.77        | 90 45 60 | 4.4 | -47.92        |
| 0 45 60 | 4.5 | -33.96         | 30 45 60 | 4.5 | -33.95         | 60 45 60 | 4.5 | -36.02        | 90 45 60 | 4.5 | -43.75        |
| 0 45 60 | 4.6 | -30.12         | 30 45 60 | 4.6 | -30.20         | 60 45 60 | 4.6 | -32.29        | 90 45 60 | 4.6 | -39.58        |
| 0 45 60 | 4.7 | -26.49         | 30 45 60 | 4.7 | -26.64         | 60 45 60 | 4.7 | -28.71        | 90 45 60 | 4.7 | -35.57        |
| 0 45 60 | 4.8 | -23.14         | 30 45 60 | 4.8 | -23.33         | 60 45 60 | 4.8 | -25.38        | 90 45 60 | 4.8 | -31.82        |
| 0 45 60 | 4.9 | -20.10         | 30 45 60 | 4.9 | -20.33         | 60 45 60 | 4.9 | -22.32        | 90 45 60 | 4.9 | -28.35        |
| 0 45 60 | 5   | -17.38         | 30 45 60 | 5   | -17.63         | 60 45 60 | 5   | -19.56        | 90 45 60 | 5   | -25.20        |
| 0 45 60 | 5.1 | -14.96         | 30 45 60 | 5.1 | -15.22         | 60 45 60 | 5.1 | -17.09        | 90 45 60 | 5.1 | -22.36        |
| 0 45 60 | 5.2 | -12.83         | 30 45 60 | 5.2 | -13.11         | 60 45 60 | 5.2 | -14.90        | 90 45 60 | 5.2 | -19.81        |
| 0 45 60 | 5.3 | -10.96         | 30 45 60 | 5.3 | -11.25         | 60 45 60 | 5.3 | -12.97        | 90 45 60 | 5.3 | -17.55        |
| 0 45 60 | 5.4 | -9.34          | 30 45 60 | 5.4 | -9.63          | 60 45 60 | 5.4 | -11.27        | 90 45 60 | 5.4 | -15.55        |
| 0 45 60 | 5.5 | -7.94          | 30 45 60 | 5.5 | -8.22          | 60 45 60 | 5.5 | -9.79         | 90 45 60 | 5.5 | -13.77        |
| 0 45 60 | 5.6 | -6.72          | 30 45 60 | 5.6 | -7.01          | 60 45 60 | 5.6 | -8.49         | 90 45 60 | 5.6 | -12.21        |
| 0 45 60 | 5.7 | -5.68          | 30 45 60 | 5.7 | -5.95          | 60 45 60 | 5.7 | -7.37         | 90 45 60 | 5.7 | -10.84        |
| 0 45 60 | 5.8 | -4.78          | 30 45 60 | 5.8 | -5.05          | 60 45 60 | 5.8 | -6.39         | 90 45 60 | 5.8 | -9.62         |
| 0 45 60 | 5.9 | -4.00          | 30 45 60 | 5.9 | -4.27          | 60 45 60 | 5.9 | -5.54         | 90 45 60 | 5.9 | -8.56         |
| 0 45 60 | 6   | -3.34          | 30 45 60 | 6   | -3.60          | 60 45 60 | 6   | -4.80         | 90 45 60 | 6   | -7.62         |
| 0 45 60 | 6.5 | -1.22          | 30 45 60 | 6.5 | -1.44          | 60 45 60 | 6.5 | -2.35         | 90 45 60 | 6.5 | -4.37         |
| 0 45 60 | 7   | -0.28          | 30 45 60 | 7   | -0.45          | 60 45 60 | 7   | -1.14         | 90 45 60 | 7   | -2.61         |
| 0 45 60 | 7.5 | 0.13           | 30 45 60 | 7.5 | -0.01          | 60 45 60 | 7.5 | -0.53         | 90 45 60 | 7.5 | -1.62         |
| 0 45 60 | 8   | 0.29           | 30 45 60 | 8   | 0.18           | 60 45 60 | 8   | -0.22         | 90 45 60 | 8   | -1.04         |
| 0 45 60 | 8.5 | 0.33           | 30 45 60 | 8.5 | 0.24           | 60 45 60 | 8.5 | -0.07         | 90 45 60 | 8.5 | -0.68         |
| 0 45 60 | 9   | 0.32           | 30 45 60 | 9   | 0.25           | 60 45 60 | 9   | 0.01          | 90 45 60 | 9   | -0.46         |
| 0 45 60 | 9.5 | 0.29           | 30 45 60 | 9.5 | 0.24           | 60 45 60 | 9.5 | 0.05          | 90 45 60 | 9.5 | -0.31         |
| 0 45 60 | 10  | 0.26           | 30 45 60 | 10  | 0.22           | 60 45 60 | 10  | 0.07          | 90 45 60 | 10  | -0.22         |
| 0 45 60 | 12  | 0.14           | 30 45 60 | 12  | 0.12           | 60 45 60 | 12  | 0.06          | 90 45 60 | 12  | -0.06         |
| 0 45 60 | 15  | 0.05           | 30 45 60 | 15  | 0.04           | 60 45 60 | 15  | 0.02          | 90 45 60 | 15  | -0.01         |
| 0 45 60 | 20  | 0.00           | 30 45 60 | 20  | 0.00           | 60 45 60 | 20  | 0.00          | 90 45 60 | 20  | 0.00          |
| 0 45 70 | 2.5 | 1611.17        | 30 45 70 | 2.5 | 1627.77        | 60 45 70 | 2.5 | 1669.82       | 90 45 70 | 2.5 | 1724.86       |
| 0 45 70 | 2.6 | 1086.15        | 30 45 70 | 2.6 | 1100.47        | 60 45 70 | 2.6 | 1135.09       | 90 45 70 | 2.6 | 1175.45       |
| 0 45 70 | 2.7 | 710.20         | 30 45 70 | 2.7 | 722.36         | 60 45 70 | 2.7 | 750.41        | 90 45 70 | 2.7 | 779.08        |
| 0 45 70 | 2.8 | 444.40         | 30 45 70 | 2.8 | 454.56         | 60 45 70 | 2.8 | 476.91        | 90 45 70 | 2.8 | 496.37        |
| 0 45 70 | 2.9 | 259.27         | 30 45 70 | 2.9 | 267.67         | 60 45 70 | 2.9 | 285.18        | 90 45 70 | 2.9 | 297.46        |
| 0 45 70 | 3   | 132.62         | 30 45 70 | 3   | 139.52         | 60 45 70 | 3   | 153.05        | 90 45 70 | 3   | 159.85        |
| 0 45 70 | 3.1 | 47.92          | 30 45 70 | 3.1 | 53.58          | 60 45 70 | 3.1 | 63.95         | 90 45 70 | 3.1 | 66.70         |
| 0 45 70 | 3.2 | -7.02          | 30 45 70 | 3.2 | -2.37          | 60 45 70 | 3.2 | 5.57          | 90 45 70 | 3.2 | 5.44          |
| 0 45 70 | 3.3 | -41.08         | 30 45 70 | 3.3 | -37.23         | 60 45 70 | 3.3 | -31.17        | 90 45 70 | 3.3 | -33.26        |
| 0 45 70 | 3.4 | -60.67         | 30 45 70 | 3.4 | -57.48         | 60 45 70 | 3.4 | -52.87        | 90 45 70 | 3.4 | -56.27        |
| 0 45 70 | 3.5 | -70.41         | 30 45 70 | 3.5 | -67.75         | 60 45 70 | 3.5 | -64.29        | 90 45 70 | 3.5 | -68.53        |
| 0 45 70 | 3.6 | <b>-73.59</b>  | 30 45 70 | 3.6 | <b>-71.38</b>  | 60 45 70 | 3.6 | <b>-68.83</b> | 90 45 70 | 3.6 | <b>-73.59</b> |
| 0 45 70 | 3.7 | -72.57         | 30 45 70 | 3.7 | -70.72         | 60 45 70 | 3.7 | <b>-68.88</b> | 90 45 70 | 3.7 | <b>-73.94</b> |
| 0 45 70 | 3.8 | -68.98         | 30 45 70 | 3.8 | -67.44         | 60 45 70 | 3.8 | -66.15        | 90 45 70 | 3.8 | -71.33        |
| 0 45 70 | 3.9 | -63.94         | 30 45 70 | 3.9 | -62.65         | 60 45 70 | 3.9 | -61.80        | 90 45 70 | 3.9 | -66.97        |
| 0 45 70 | 4   | -58.21         | 30 45 70 | 4   | -57.13         | 60 45 70 | 4   | -56.62        | 90 45 70 | 4   | -61.68        |
| 0 45 70 | 4.1 | -52.30         | 30 45 70 | 4.1 | -51.39         | 60 45 70 | 4.1 | -51.14        | 90 45 70 | 4.1 | -56.04        |
| 0 45 70 | 4.2 | -46.51         | 30 45 70 | 4.2 | -45.75         | 60 45 70 | 4.2 | -45.70        | 90 45 70 | 4.2 | -50.41        |
| 0 45 70 | 4.3 | -41.04         | 30 45 70 | 4.3 | -40.41         | 60 45 70 | 4.3 | -40.51        | 90 45 70 | 4.3 | -45.00        |
| 0 45 70 | 4.4 | -35.99         | 30 45 70 | 4.4 | -35.47         | 60 45 70 | 4.4 | -35.69        | 90 45 70 | 4.4 | -39.96        |
| 0 45 70 | 4.5 | -31.42         | 30 45 70 | 4.5 | -30.98         | 60 45 70 | 4.5 | -31.30        | 90 45 70 | 4.5 | -35.34        |
| 0 45 70 | 4.6 | -27.33         | 30 45 70 | 4.6 | -26.97         | 60 45 70 | 4.6 | -27.35        | 90 45 70 | 4.6 | -31.16        |
| 0 45 70 | 4.7 | -23.70         | 30 45 70 | 4.7 | -23.40         | 60 45 70 | 4.7 | -23.84        | 90 45 70 | 4.7 | -27.43        |
| 0 45 70 | 4.8 | -20.51         | 30 45 70 | 4.8 | -20.27         | 60 45 70 | 4.8 | -20.74        | 90 45 70 | 4.8 | -24.11        |
| 0 45 70 | 4.9 | -17.72         | 30 45 70 | 4.9 | -17.52         | 60 45 70 | 4.9 | -18.02        | 90 45 70 | 4.9 | -21.18        |
| 0 45 70 | 5   | -15.29         | 30 45 70 | 5   | -15.13         | 60 45 70 | 5   | -15.64        | 90 45 70 | 5   | -18.61        |
| 0 45 70 | 5.1 | -13.18         | 30 45 70 | 5.1 | -13.05         | 60 45 70 | 5.1 | -13.56        | 90 45 70 | 5.1 | -16.35        |
| 0 45 70 | 5.2 | -11.35         | 30 45 70 | 5.2 | -11.25         | 60 45 70 | 5.2 | -11.76        | 90 45 70 | 5.2 | -14.38        |
| 0 45 70 | 5.3 | -9.77          | 30 45 70 | 5.3 | -9.69          | 60 45 70 | 5.3 | -10.20        | 90 45 70 | 5.3 | -12.65        |
| 0 45 70 | 5.4 | -8.40          | 30 45 70 | 5.4 | -8.34          | 60 45 70 | 5.4 | -8.84         | 90 45 70 | 5.4 | -11.14        |
| 0 45 70 | 5.5 | -7.22          | 30 45 70 | 5.5 | -7.17          | 60 45 70 | 5.5 | -7.67         | 90 45 70 | 5.5 | -9.82         |
| 0 45 70 | 5.6 | -6.20          | 30 45 70 | 5.6 | -6.17          | 60 45 70 | 5.6 | -6.65         | 90 45 70 | 5.6 | -8.67         |
| 0 45 70 | 5.7 | -5.32          | 30 45 70 | 5.7 | -5.30          | 60 45 70 | 5.7 | -5.77         | 90 45 70 | 5.7 | -7.67         |
| 0 45 70 | 5.8 | -4.56          | 30 45 70 | 5.8 | -4.55          | 60 45 70 | 5.8 | -5.00         | 90 45 70 | 5.8 | -6.79         |
| 0 45 70 | 5.9 | -3.91          | 30 45 70 | 5.9 | -3.90          | 60 45 70 | 5.9 | -4.34         | 90 45 70 | 5.9 | -6.02         |
| 0 45 70 | 6   | -3.34          | 30 45 70 | 6   | -3.35          | 60 45 70 | 6   | -3.77         | 90 45 70 | 6   | -5.34         |
| 0 45 70 | 6.5 | -1.49          | 30 45 70 | 6.5 | -1.51          | 60 45 70 | 6.5 | -1.86         | 90 45 70 | 6.5 | -3.02         |
| 0 45 70 | 7   | -0.59          | 30 45 70 | 7   | -0.63          | 60 45 70 | 7   | -0.90         | 90 45 70 | 7   | -1.76         |
| 0 45 70 | 7.5 | -0.16          | 30 45 70 | 7.5 | -0.19          | 60 45 70 | 7.5 | -0.42         | 90 45 70 | 7.5 | -1.06         |
| 0 45 70 | 8   | 0.04           | 30 45 70 | 8   | 0.01           | 60 45 70 | 8   | -0.16         | 90 45 70 | 8   | -0.65         |
| 0 45 70 | 8.5 | 0.13           | 30 45 70 | 8.5 | 0.11           | 60 45 70 | 8.5 | -0.03         | 90 45 70 | 8.5 | -0.41         |
| 0 45 70 | 9   | 0.16           | 30 45 70 | 9   | 0.14           | 60 45 70 | 9   | 0.03          | 90 45 70 | 9   | -0.26         |
| 0 45 70 | 9.5 | 0.17           | 30 45 70 | 9.5 | 0.15           | 60 45 70 | 9.5 | 0.06          | 90 45 70 | 9.5 | -0.16         |
| 0 45 70 | 10  | 0.16           | 30 45 70 | 10  | 0.14           | 60 45 70 | 10  | 0.07          | 90 45 70 | 10  | -0.10         |
| 0 45 70 | 12  | 0.09           | 30 45 70 | 12  | 0.09           | 60 45 70 | 12  | 0.06          | 90 45 70 | 12  | -0.02         |
| 0 45 70 | 15  | 0.04           | 30 45 70 | 15  | 0.03           | 60 45 70 | 15  | 0.03          | 90 45 70 | 15  | 0.00          |
| 0 45 70 | 20  | 0.00           | 30 45 70 | 20  | 0.00           | 60 45 70 | 20  | 0.00          | 90 45 70 | 20  | 0.00          |
| 0 45 80 | 2.5 | 791.32         | 30 45 80 | 2.5 | 807.65         | 60 45 80 | 2.5 | 842.85        | 90 45 80 | 2.5 | 869.99        |
| 0 45 80 | 2.6 | 467.49         | 30 45 80 | 2.6 | 481.21         | 60 45 80 | 2.6 | 509.99        | 90 45 80 | 2.6 | 529.82        |
| 0 45 80 | 2.7 | 247.30         | 30 45 80 | 2.7 | 258.75         | 60 45 80 | 2.7 | 282.11        | 90 45 80 | 2.7 | 296.17        |
| 0 45 80 | 2.8 | 100.85         | 30 45 80 | 2.8 | 110.44         | 60 45 80 | 2.8 | 129.39        | 90 45 80 | 2.8 | 139.00        |
| 0 45 80 | 2.9 | 6.30           | 30 45 80 | 2.9 | 14.38          | 60 45 80 | 2.9 | 29.86         | 90 45 80 | 2.9 | 36.17         |
| 0 45 80 | 3   | -52.14         | 30 45 80 | 3   | -45.26         | 60 45 80 | 3   | -32.49        | 90 45 80 | 3   | -28.56        |
| 0 45 80 | 3.1 | -85.77         | 30 45 80 | 3.1 | -79.88         | 60 45 80 | 3.1 | -69.26        | 90 45 80 | 3.1 | -66.98        |
| 0 45 80 | 3.2 | -102.66        | 30 45 80 | 3.2 | -97.61         | 60 45 80 | 3.2 | -88.71        | 90 45 80 | 3.2 | -87.59        |
| 0 45 80 | 3.3 | <b>-108.53</b> | 30 45 80 | 3.3 | <b>-104.19</b> | 60 45 80 | 3.3 | -96.72        | 90 45 80 | 3.3 | -96.42        |
| 0 45 80 | 3.4 | -107.43        | 30 45 80 | 3.4 | -103.70        | 60 45 80 | 3.4 | <b>-97.42</b> | 90 45 80 | 3.4 | <b>-97.70</b> |
| 0 45 80 | 3.5 | -102.15        | 30 45 80 | 3.5 | -98.94         | 60 45 80 | 3.5 | -93.65        | 90 45 80 | 3.5 | -94.34        |
| 0 45 80 | 3.6 | -94.59         | 30 45 80 | 3.6 | -91.82         | 60 45 80 | 3.6 | -87.33        | 90 45 80 | 3.6 | -88.31        |
| 0 45 80 | 3.7 | -86.00         | 30 45 80 | 3.7 | -83.60         | 60 45 80 | 3.7 | -79.77        | 90 45 80 | 3.7 | -80.92        |
| 0 45 80 | 3.8 | -77.18         | 30 45 80 | 3.8 | -75.08         | 60 45 80 | 3.8 | -71.79        | 90 45 80 | 3.8 | -73.05        |
| 0 45 80 | 3.9 | -68.61         | 30 45 80 | 3.9 | -66.76         | 60 45 80 | 3.9 | -63.92        | 90 45 80 | 3.9 | -65.23        |
| 0 45 80 | 4   | -60.56         | 30 45 80 | 4   | -58.93         | 60 45 80 | 4   | -56.46        | 90 45 80 | 4   | -57.78        |
| 0 45 80 | 4.1 | -53.19         | 30 45 80 | 4.1 | -51.74         | 60 45 80 | 4.1 | -49.57        | 90 45 80 | 4.1 | -50.88        |
| 0 45 80 | 4.2 | -46.54         | 30 45 80 | 4.2 | -45.24         | 60 45 80 | 4.2 | -43.34        | 90 45 80 | 4.2 | -44.62        |

|         |     |                |          |     |                |          |     |                |          |     |                |
|---------|-----|----------------|----------|-----|----------------|----------|-----|----------------|----------|-----|----------------|
| 0 45 80 | 4.3 | -40.61         | 30 45 80 | 4.3 | -39.45         | 60 45 80 | 4.3 | -37.78         | 90 45 80 | 4.3 | -39.02         |
| 0 45 80 | 4.4 | -35.38         | 30 45 80 | 4.4 | -34.34         | 60 45 80 | 4.4 | -32.86         | 90 45 80 | 4.4 | -34.05         |
| 0 45 80 | 4.5 | -30.79         | 30 45 80 | 4.5 | -29.86         | 60 45 80 | 4.5 | -28.54         | 90 45 80 | 4.5 | -29.69         |
| 0 45 80 | 4.6 | -26.79         | 30 45 80 | 4.6 | -25.94         | 60 45 80 | 4.6 | -24.78         | 90 45 80 | 4.6 | -25.87         |
| 0 45 80 | 4.7 | -23.30         | 30 45 80 | 4.7 | -22.54         | 60 45 80 | 4.7 | -21.50         | 90 45 80 | 4.7 | -22.54         |
| 0 45 80 | 4.8 | -20.28         | 30 45 80 | 4.8 | -19.59         | 60 45 80 | 4.8 | -18.66         | 90 45 80 | 4.8 | -19.65         |
| 0 45 80 | 4.9 | -17.66         | 30 45 80 | 4.9 | -17.04         | 60 45 80 | 4.9 | -16.21         | 90 45 80 | 4.9 | -17.14         |
| 0 45 80 | 5   | -15.39         | 30 45 80 | 5   | -14.82         | 60 45 80 | 5   | -14.08         | 90 45 80 | 5   | -14.97         |
| 0 45 80 | 5.1 | -13.43         | 30 45 80 | 5.1 | -12.91         | 60 45 80 | 5.1 | -12.24         | 90 45 80 | 5.1 | -13.09         |
| 0 45 80 | 5.2 | -11.72         | 30 45 80 | 5.2 | -11.25         | 60 45 80 | 5.2 | -10.66         | 90 45 80 | 5.2 | -11.45         |
| 0 45 80 | 5.3 | -10.25         | 30 45 80 | 5.3 | -9.82          | 60 45 80 | 5.3 | -9.29          | 90 45 80 | 5.3 | -10.04         |
| 0 45 80 | 5.4 | -8.97          | 30 45 80 | 5.4 | -8.58          | 60 45 80 | 5.4 | -8.10          | 90 45 80 | 5.4 | -8.81          |
| 0 45 80 | 5.5 | -7.86          | 30 45 80 | 5.5 | -7.51          | 60 45 80 | 5.5 | -7.07          | 90 45 80 | 5.5 | -7.75          |
| 0 45 80 | 5.6 | -6.90          | 30 45 80 | 5.6 | -6.57          | 60 45 80 | 5.6 | -6.18          | 90 45 80 | 5.6 | -6.82          |
| 0 45 80 | 5.7 | -6.06          | 30 45 80 | 5.7 | -5.76          | 60 45 80 | 5.7 | -5.41          | 90 45 80 | 5.7 | -6.01          |
| 0 45 80 | 5.8 | -5.33          | 30 45 80 | 5.8 | -5.05          | 60 45 80 | 5.8 | -4.73          | 90 45 80 | 5.8 | -5.31          |
| 0 45 80 | 5.9 | -4.69          | 30 45 80 | 5.9 | -4.44          | 60 45 80 | 5.9 | -4.15          | 90 45 80 | 5.9 | -4.69          |
| 0 45 80 | 6   | -4.13          | 30 45 80 | 6   | -3.90          | 60 45 80 | 6   | -3.64          | 90 45 80 | 6   | -4.15          |
| 0 45 80 | 6.5 | -2.23          | 30 45 80 | 6.5 | -2.07          | 60 45 80 | 6.5 | -1.91          | 90 45 80 | 6.5 | -2.30          |
| 0 45 80 | 7   | -1.22          | 30 45 80 | 7   | -1.11          | 60 45 80 | 7   | -1.01          | 90 45 80 | 7   | -1.31          |
| 0 45 80 | 7.5 | -0.67          | 30 45 80 | 7.5 | -0.60          | 60 45 80 | 7.5 | -0.53          | 90 45 80 | 7.5 | -0.76          |
| 0 45 80 | 8   | -0.36          | 30 45 80 | 8   | -0.31          | 60 45 80 | 8   | -0.27          | 90 45 80 | 8   | -0.45          |
| 0 45 80 | 8.5 | -0.19          | 30 45 80 | 8.5 | -0.15          | 60 45 80 | 8.5 | -0.12          | 90 45 80 | 8.5 | -0.26          |
| 0 45 80 | 9   | -0.09          | 30 45 80 | 9   | -0.06          | 60 45 80 | 9   | -0.04          | 90 45 80 | 9   | -0.15          |
| 0 45 80 | 9.5 | -0.03          | 30 45 80 | 9.5 | -0.01          | 60 45 80 | 9.5 | 0.00           | 90 45 80 | 9.5 | -0.09          |
| 0 45 80 | 10  | 0.00           | 30 45 80 | 10  | 0.02           | 60 45 80 | 10  | 0.02           | 90 45 80 | 10  | -0.04          |
| 0 45 80 | 12  | 0.03           | 30 45 80 | 12  | 0.04           | 60 45 80 | 12  | 0.04           | 90 45 80 | 12  | 0.01           |
| 0 45 80 | 15  | 0.02           | 30 45 80 | 15  | 0.02           | 60 45 80 | 15  | 0.02           | 90 45 80 | 15  | 0.01           |
| 0 45 80 | 20  | 0.00           | 30 45 80 | 20  | 0.00           | 60 45 80 | 20  | 0.00           | 90 45 80 | 20  | 0.00           |
| 0 45 90 | 2.5 | 1072.03        | 30 45 90 | 2.5 | 1086.60        | 60 45 90 | 2.5 | 1015.39        | 90 45 90 | 2.5 | 1029.58        |
| 0 45 90 | 2.6 | 598.64         | 30 45 90 | 2.6 | 611.72         | 60 45 90 | 2.6 | 637.57         | 90 45 90 | 2.6 | 650.28         |
| 0 45 90 | 2.7 | 117.71         | 30 45 90 | 2.7 | 129.38         | 60 45 90 | 2.7 | 152.40         | 90 45 90 | 2.7 | 163.70         |
| 0 45 90 | 2.8 | 1.78           | 30 45 90 | 2.8 | 12.14          | 60 45 90 | 2.8 | 32.56          | 90 45 90 | 2.8 | 42.56          |
| 0 45 90 | 2.9 | -69.09         | 30 45 90 | 2.9 | -59.92         | 60 45 90 | 2.9 | -41.86         | 90 45 90 | 2.9 | -33.03         |
| 0 45 90 | 3   | -109.28        | 30 45 90 | 3   | -101.17        | 60 45 90 | 3   | -85.21         | 90 45 90 | 3   | -77.40         |
| 0 45 90 | 3.1 | -128.98        | 30 45 90 | 3.1 | -121.82        | 60 45 90 | 3.1 | -107.70        | 90 45 90 | 3.1 | -100.78        |
| 0 45 90 | 3.2 | <b>-135.36</b> | 30 45 90 | 3.2 | <b>-129.03</b> | 60 45 90 | 3.2 | -116.54        | 90 45 90 | 3.2 | -110.39        |
| 0 45 90 | 3.3 | -133.38        | 30 45 90 | 3.3 | -127.79        | 60 45 90 | 3.3 | <b>-116.73</b> | 90 45 90 | 3.3 | <b>-111.26</b> |
| 0 45 90 | 3.4 | -126.47        | 30 45 90 | 3.4 | -121.52        | 60 45 90 | 3.4 | -111.70        | 90 45 90 | 3.4 | -106.83        |
| 0 45 90 | 3.5 | -116.90        | 30 45 90 | 3.5 | -112.51        | 60 45 90 | 3.5 | -103.79        | 90 45 90 | 3.5 | -99.44         |
| 0 45 90 | 3.6 | -106.19        | 30 45 90 | 3.6 | -102.29        | 60 45 90 | 3.6 | -94.51         | 90 45 90 | 3.6 | -90.63         |
| 0 45 90 | 3.7 | -95.30         | 30 45 90 | 3.7 | -91.82         | 60 45 90 | 3.7 | -84.86         | 90 45 90 | 3.7 | -81.38         |
| 0 45 90 | 3.8 | -84.81         | 30 45 90 | 3.8 | -81.67         | 60 45 90 | 3.8 | -75.42         | 90 45 90 | 3.8 | -72.29         |
| 0 45 90 | 3.9 | -75.01         | 30 45 90 | 3.9 | -72.18         | 60 45 90 | 3.9 | -66.54         | 90 45 90 | 3.9 | -63.72         |
| 0 45 90 | 4   | -66.06         | 30 45 90 | 4   | -63.50         | 60 45 90 | 4   | -58.39         | 90 45 90 | 4   | -55.84         |
| 0 45 90 | 4.1 | -58.01         | 30 45 90 | 4.1 | -55.69         | 60 45 90 | 4.1 | -51.06         | 90 45 90 | 4.1 | -48.74         |
| 0 45 90 | 4.2 | -50.86         | 30 45 90 | 4.2 | -48.75         | 60 45 90 | 4.2 | -44.53         | 90 45 90 | 4.2 | -42.43         |
| 0 45 90 | 4.3 | -44.55         | 30 45 90 | 4.3 | -42.63         | 60 45 90 | 4.3 | -38.79         | 90 45 90 | 4.3 | -36.87         |
| 0 45 90 | 4.4 | -39.01         | 30 45 90 | 4.4 | -37.26         | 60 45 90 | 4.4 | -33.76         | 90 45 90 | 4.4 | -32.01         |
| 0 45 90 | 4.5 | -34.18         | 30 45 90 | 4.5 | -32.58         | 60 45 90 | 4.5 | -29.38         | 90 45 90 | 4.5 | -27.78         |
| 0 45 90 | 4.6 | -29.97         | 30 45 90 | 4.6 | -28.51         | 60 45 90 | 4.6 | -25.58         | 90 45 90 | 4.6 | -24.12         |
| 0 45 90 | 4.7 | -26.32         | 30 45 90 | 4.7 | -24.97         | 60 45 90 | 4.7 | -22.29         | 90 45 90 | 4.7 | -20.95         |
| 0 45 90 | 4.8 | -23.14         | 30 45 90 | 4.8 | -21.91         | 60 45 90 | 4.8 | -19.45         | 90 45 90 | 4.8 | -18.22         |
| 0 45 90 | 4.9 | -20.38         | 30 45 90 | 4.9 | -19.25         | 60 45 90 | 4.9 | -16.99         | 90 45 90 | 4.9 | -15.86         |
| 0 45 90 | 5   | -17.98         | 30 45 90 | 5   | -16.94         | 60 45 90 | 5   | -14.86         | 90 45 90 | 5   | -13.82         |
| 0 45 90 | 5.1 | -15.89         | 30 45 90 | 5.1 | -14.94         | 60 45 90 | 5.1 | -13.02         | 90 45 90 | 5.1 | -12.06         |
| 0 45 90 | 5.2 | -14.08         | 30 45 90 | 5.2 | -13.19         | 60 45 90 | 5.2 | -11.42         | 90 45 90 | 5.2 | -10.54         |
| 0 45 90 | 5.3 | -12.49         | 30 45 90 | 5.3 | -11.68         | 60 45 90 | 5.3 | -10.04         | 90 45 90 | 5.3 | -9.23          |
| 0 45 90 | 5.4 | -11.11         | 30 45 90 | 5.4 | -10.35         | 60 45 90 | 5.4 | -8.84          | 90 45 90 | 5.4 | -8.09          |
| 0 45 90 | 5.5 | -9.89          | 30 45 90 | 5.5 | -9.20          | 60 45 90 | 5.5 | -7.80          | 90 45 90 | 5.5 | -7.10          |
| 0 45 90 | 5.6 | -8.83          | 30 45 90 | 5.6 | -8.18          | 60 45 90 | 5.6 | -6.89          | 90 45 90 | 5.6 | -6.24          |
| 0 45 90 | 5.7 | -7.90          | 30 45 90 | 5.7 | -7.30          | 60 45 90 | 5.7 | -6.10          | 90 45 90 | 5.7 | -5.50          |
| 0 45 90 | 5.8 | -7.08          | 30 45 90 | 5.8 | -6.52          | 60 45 90 | 5.8 | -5.41          | 90 45 90 | 5.8 | -4.85          |
| 0 45 90 | 5.9 | -6.35          | 30 45 90 | 5.9 | -5.83          | 60 45 90 | 5.9 | -4.80          | 90 45 90 | 5.9 | -4.28          |
| 0 45 90 | 6   | -5.71          | 30 45 90 | 6   | -5.23          | 60 45 90 | 6   | -4.26          | 90 45 90 | 6   | -3.78          |
| 0 45 90 | 6.5 | -3.44          | 30 45 90 | 6.5 | -3.10          | 60 45 90 | 6.5 | -2.42          | 90 45 90 | 6.5 | -2.08          |
| 0 45 90 | 7   | -2.15          | 30 45 90 | 7   | -1.90          | 60 45 90 | 7   | -1.41          | 90 45 90 | 7   | -1.17          |
| 0 45 90 | 7.5 | -1.38          | 30 45 90 | 7.5 | -1.20          | 60 45 90 | 7.5 | -0.84          | 90 45 90 | 7.5 | -0.67          |
| 0 45 90 | 8   | -0.91          | 30 45 90 | 8   | -0.78          | 60 45 90 | 8   | -0.51          | 90 45 90 | 8   | -0.38          |
| 0 45 90 | 8.5 | -0.61          | 30 45 90 | 8.5 | -0.51          | 60 45 90 | 8.5 | -0.31          | 90 45 90 | 8.5 | -0.21          |
| 0 45 90 | 9   | -0.42          | 30 45 90 | 9   | -0.35          | 60 45 90 | 9   | -0.19          | 90 45 90 | 9   | -0.11          |
| 0 45 90 | 9.5 | -0.29          | 30 45 90 | 9.5 | -0.24          | 60 45 90 | 9.5 | -0.12          | 90 45 90 | 9.5 | -0.06          |
| 0 45 90 | 10  | -0.21          | 30 45 90 | 10  | -0.16          | 60 45 90 | 10  | -0.07          | 90 45 90 | 10  | -0.02          |
| 0 45 90 | 12  | -0.06          | 30 45 90 | 12  | -0.04          | 60 45 90 | 12  | 0.00           | 90 45 90 | 12  | 0.02           |
| 0 45 90 | 15  | -0.01          | 30 45 90 | 15  | 0.00           | 60 45 90 | 15  | 0.01           | 90 45 90 | 15  | 0.01           |
| 0 45 90 | 20  | 0.00           | 30 45 90 | 20  | 0.00           | 60 45 90 | 20  | 0.00           | 90 45 90 | 20  | 0.00           |
| 0 60 0  | 2.5 | 153006.85      | 30 60 0  | 2.5 | 153006.85      | 60 60 0  | 2.5 | 153006.86      | 90 60 0  | 2.5 | 153006.85      |
| 0 60 0  | 2.6 | 103461.81      | 30 60 0  | 2.6 | 103461.81      | 60 60 0  | 2.6 | 103461.81      | 90 60 0  | 2.6 | 103461.81      |
| 0 60 0  | 2.7 | 76218.42       | 30 60 0  | 2.7 | 76218.42       | 60 60 0  | 2.7 | 76218.42       | 90 60 0  | 2.7 | 76218.42       |
| 0 60 0  | 2.8 | 63064.40       | 30 60 0  | 2.8 | 63064.40       | 60 60 0  | 2.8 | 63064.40       | 90 60 0  | 2.8 | 63064.40       |
| 0 60 0  | 2.9 | 58144.75       | 30 60 0  | 2.9 | 58144.75       | 60 60 0  | 2.9 | 58144.75       | 90 60 0  | 2.9 | 58144.75       |
| 0 60 0  | 3   | 57187.01       | 30 60 0  | 3   | 57187.01       | 60 60 0  | 3   | 57187.01       | 90 60 0  | 3   | 57187.01       |
| 0 60 0  | 3.1 | 54754.69       | 30 60 0  | 3.1 | 54754.69       | 60 60 0  | 3.1 | 54754.69       | 90 60 0  | 3.1 | 54754.69       |
| 0 60 0  | 3.2 | 43372.28       | 30 60 0  | 3.2 | 43372.28       | 60 60 0  | 3.2 | 43372.28       | 90 60 0  | 3.2 | 43372.28       |
| 0 60 0  | 3.3 | 33548.21       | 30 60 0  | 3.3 | 33548.21       | 60 60 0  | 3.3 | 33548.21       | 90 60 0  | 3.3 | 33548.21       |
| 0 60 0  | 3.4 | 25605.80       | 30 60 0  | 3.4 | 25605.80       | 60 60 0  | 3.4 | 25605.81       | 90 60 0  | 3.4 | 25605.80       |
| 0 60 0  | 3.5 | 19357.35       | 30 60 0  | 3.5 | 19357.35       | 60 60 0  | 3.5 | 19357.35       | 90 60 0  | 3.5 | 19357.35       |
| 0 60 0  | 3.6 | 14506.14       | 30 60 0  | 3.6 | 14506.14       | 60 60 0  | 3.6 | 14506.14       | 90 60 0  | 3.6 | 14506.14       |
| 0 60 0  | 3.7 | 10779.60       | 30 60 0  | 3.7 | 10779.60       | 60 60 0  | 3.7 | 10779.60       | 90 60 0  | 3.7 | 10779.60       |
| 0 60 0  | 3.8 | 7949.81        | 30 60 0  | 3.8 | 7949.81        | 60 60 0  | 3.8 | 7949.81        | 90 60 0  | 3.8 | 7949.81        |
| 0 60 0  | 3.9 | 5812.78        | 30 60 0  | 3.9 | 5812.78        | 60 60 0  | 3.9 | 5812.78        | 90 60 0  | 3.9 | 5812.78        |
| 0 60 0  | 4   | 4215.36        | 30 60 0  | 4   | 4215.36        | 60 60 0  | 4   | 4215.37        | 90 60 0  | 4   | 4215.36        |
| 0 60 0  | 4.1 | 3028.42        | 30 60 0  | 4.1 | 3028.42        | 60 60 0  | 4.1 | 3028.42        | 90 60 0  | 4.1 | 3028.42        |
| 0 60 0  | 4.2 | 2152.89        | 30 60 0  | 4.2 | 2152.89        | 60 60 0  | 4.2 | 2152.89        | 90 60 0  | 4.2 | 2152.89        |
| 0 60 0  | 4.3 | 1512.61        | 30 60 0  | 4.3 | 1512.61        | 60 60 0  | 4.3 | 1512.61        | 90 60 0  | 4.3 | 1512.61        |

|   |    |    |     |               |      |    |    |     |               |    |    |    |     |               |    |    |    |     |               |
|---|----|----|-----|---------------|------|----|----|-----|---------------|----|----|----|-----|---------------|----|----|----|-----|---------------|
| 0 | 60 | 0  | 4.4 | 1047.51       | 30   | 60 | 0  | 4.4 | 1047.51       | 60 | 60 | 0  | 4.4 | 1047.51       | 90 | 60 | 0  | 4.4 | 1047.51       |
| 0 | 60 | 0  | 4.5 | 712.91        | 30   | 60 | 0  | 4.5 | 712.91        | 60 | 60 | 0  | 4.5 | 712.91        | 90 | 60 | 0  | 4.5 | 712.91        |
| 0 | 60 | 0  | 4.6 | 474.06        | 30   | 60 | 0  | 4.6 | 474.06        | 60 | 60 | 0  | 4.6 | 474.07        | 90 | 60 | 0  | 4.6 | 474.06        |
| 0 | 60 | 0  | 4.7 | 305.12        | 30   | 60 | 0  | 4.7 | 305.12        | 60 | 60 | 0  | 4.7 | 305.12        | 90 | 60 | 0  | 4.7 | 305.12        |
| 0 | 60 | 0  | 4.8 | 187.16        | 30   | 60 | 0  | 4.8 | 187.16        | 60 | 60 | 0  | 4.8 | 187.16        | 90 | 60 | 0  | 4.8 | 187.16        |
| 0 | 60 | 0  | 4.9 | 105.85        | 30   | 60 | 0  | 4.9 | 105.85        | 60 | 60 | 0  | 4.9 | 105.85        | 90 | 60 | 0  | 4.9 | 105.85        |
| 0 | 60 | 0  | 5   | 50.95         | 30   | 60 | 0  | 5   | 50.95         | 60 | 60 | 0  | 5   | 50.95         | 90 | 60 | 0  | 5   | 50.95         |
| 0 | 60 | 0  | 5.1 | 14.68         | 30   | 60 | 0  | 5.1 | 14.68         | 60 | 60 | 0  | 5.1 | 14.68         | 90 | 60 | 0  | 5.1 | 14.68         |
| 0 | 60 | 0  | 5.2 | -8.42         | 30   | 60 | 0  | 5.2 | -8.42         | 60 | 60 | 0  | 5.2 | -8.42         | 90 | 60 | 0  | 5.2 | -8.42         |
| 0 | 60 | 0  | 5.3 | -22.42        | 30   | 60 | 0  | 5.3 | -22.42        | 60 | 60 | 0  | 5.3 | -22.42        | 90 | 60 | 0  | 5.3 | -22.42        |
| 0 | 60 | 0  | 5.4 | -30.24        | 30   | 60 | 0  | 5.4 | -30.24        | 60 | 60 | 0  | 5.4 | -30.24        | 90 | 60 | 0  | 5.4 | -30.24        |
| 0 | 60 | 0  | 5.5 | -33.87        | 30   | 60 | 0  | 5.5 | -33.87        | 60 | 60 | 0  | 5.5 | -33.87        | 90 | 60 | 0  | 5.5 | -33.87        |
| 0 | 60 | 0  | 5.6 | <b>-34.84</b> | 30   | 60 | 0  | 5.6 | <b>-34.84</b> | 60 | 60 | 0  | 5.6 | <b>-34.84</b> | 90 | 60 | 0  | 5.6 | <b>-34.84</b> |
| 0 | 60 | 0  | 5.7 | -34.08        | 30   | 60 | 0  | 5.7 | -34.08        | 60 | 60 | 0  | 5.7 | -34.07        | 90 | 60 | 0  | 5.7 | -34.08        |
| 0 | 60 | 0  | 5.8 | -32.31        | 30   | 60 | 0  | 5.8 | -32.31        | 60 | 60 | 0  | 5.8 | -32.30        | 90 | 60 | 0  | 5.8 | -32.31        |
| 0 | 60 | 0  | 5.9 | -29.99        | 30   | 60 | 0  | 5.9 | -29.99        | 60 | 60 | 0  | 5.9 | -29.99        | 90 | 60 | 0  | 5.9 | -29.99        |
| 0 | 60 | 0  | 6   | -27.40        | 30   | 60 | 0  | 6   | -27.40        | 60 | 60 | 0  | 6   | -27.40        | 90 | 60 | 0  | 6   | -27.40        |
| 0 | 60 | 0  | 6.5 | -15.65        | 30   | 60 | 0  | 6.5 | -15.65        | 60 | 60 | 0  | 6.5 | -15.65        | 90 | 60 | 0  | 6.5 | -15.65        |
| 0 | 60 | 0  | 7   | -8.51         | 30   | 60 | 0  | 7   | -8.51         | 60 | 60 | 0  | 7   | -8.51         | 90 | 60 | 0  | 7   | -8.51         |
| 0 | 60 | 0  | 7.5 | -4.73         | 30   | 60 | 0  | 7.5 | -4.73         | 60 | 60 | 0  | 7.5 | -4.72         | 90 | 60 | 0  | 7.5 | -4.73         |
| 0 | 60 | 0  | 8   | -2.73         | 30   | 60 | 0  | 8   | -2.73         | 60 | 60 | 0  | 8   | -2.73         | 90 | 60 | 0  | 8   | -2.73         |
| 0 | 60 | 0  | 8.5 | -1.65         | 30   | 60 | 0  | 8.5 | -1.65         | 60 | 60 | 0  | 8.5 | -1.65         | 90 | 60 | 0  | 8.5 | -1.65         |
| 0 | 60 | 0  | 9   | -1.04         | 30   | 60 | 0  | 9   | -1.04         | 60 | 60 | 0  | 9   | -1.03         | 90 | 60 | 0  | 9   | -1.04         |
| 0 | 60 | 0  | 9.5 | -0.67         | 30   | 60 | 0  | 9.5 | -0.67         | 60 | 60 | 0  | 9.5 | -0.67         | 90 | 60 | 0  | 9.5 | -0.67         |
| 0 | 60 | 0  | 10  | -0.44         | 30   | 60 | 0  | 10  | -0.44         | 60 | 60 | 0  | 10  | -0.44         | 90 | 60 | 0  | 10  | -0.44         |
| 0 | 60 | 0  | 12  | -0.10         | 30   | 60 | 0  | 12  | -0.10         | 60 | 60 | 0  | 12  | -0.10         | 90 | 60 | 0  | 12  | -0.10         |
| 0 | 60 | 0  | 15  | -0.02         | 30   | 60 | 0  | 15  | -0.02         | 60 | 60 | 0  | 15  | -0.01         | 90 | 60 | 0  | 15  | -0.02         |
| 0 | 60 | 0  | 20  | 0.00          | 30   | 60 | 0  | 20  | 0.00          | 60 | 60 | 0  | 20  | 0.00          | 90 | 60 | 0  | 20  | 0.00          |
| 0 | 60 | 10 | 2.5 | 68432.56      | 30   | 60 | 10 | 2.5 | 70370.71      | 60 | 60 | 10 | 2.5 | 78863.49      | 90 | 60 | 10 | 2.5 | 100342.29     |
| 0 | 60 | 10 | 2.6 | 55823.36      | 30   | 60 | 10 | 2.6 | 57643.07      | 60 | 60 | 10 | 2.6 | 64134.52      | 90 | 60 | 10 | 2.6 | 77337.27      |
| 0 | 60 | 10 | 2.7 | 50745.30      | 30   | 60 | 10 | 2.7 | 52392.92      | 60 | 60 | 10 | 2.7 | 57435.18      | 90 | 60 | 10 | 2.7 | 65050.08      |
| 0 | 60 | 10 | 2.8 | 50303.53      | 30   | 60 | 10 | 2.8 | 51891.19      | 60 | 60 | 10 | 2.8 | 56201.32      | 90 | 60 | 10 | 2.8 | 59636.87      |
| 0 | 60 | 10 | 2.9 | 51577.91      | 30   | 60 | 10 | 2.9 | 53189.97      | 60 | 60 | 10 | 2.9 | 57817.73      | 90 | 60 | 10 | 2.9 | 55298.51      |
| 0 | 60 | 10 | 3   | 48598.99      | 30   | 60 | 10 | 3   | 49140.91      | 60 | 60 | 10 | 3   | 49625.37      | 90 | 60 | 10 | 3   | 48166.30      |
| 0 | 60 | 10 | 3.1 | 41196.26      | 30   | 60 | 10 | 3.1 | 41274.46      | 60 | 60 | 10 | 3.1 | 41227.62      | 90 | 60 | 10 | 3.1 | 40349.66      |
| 0 | 60 | 10 | 3.2 | 33331.44      | 30   | 60 | 10 | 3.2 | 33358.87      | 60 | 60 | 10 | 3.2 | 33261.83      | 90 | 60 | 10 | 3.2 | 32712.76      |
| 0 | 60 | 10 | 3.3 | 26281.17      | 30   | 60 | 10 | 3.3 | 26285.03      | 60 | 60 | 10 | 3.3 | 26207.27      | 90 | 60 | 10 | 3.3 | 25910.90      |
| 0 | 60 | 10 | 3.4 | 20350.60      | 30   | 60 | 10 | 3.4 | 20348.47      | 60 | 60 | 10 | 3.4 | 20292.31      | 90 | 60 | 10 | 3.4 | 20107.67      |
| 0 | 60 | 10 | 3.5 | 15551.90      | 30   | 60 | 10 | 3.5 | 15547.89      | 60 | 60 | 10 | 3.5 | 15505.79      | 90 | 60 | 10 | 3.5 | 15381.37      |
| 0 | 60 | 10 | 3.6 | 11756.34      | 30   | 60 | 10 | 3.6 | 11751.38      | 60 | 60 | 10 | 3.6 | 11717.18      | 90 | 60 | 10 | 3.6 | 11625.81      |
| 0 | 60 | 10 | 3.7 | 8801.50       | 30   | 60 | 10 | 3.7 | 8795.92       | 60 | 60 | 10 | 3.7 | 8766.07       | 90 | 60 | 10 | 3.7 | 8693.63       |
| 0 | 60 | 10 | 3.8 | 6534.67       | 30   | 60 | 10 | 3.8 | 6528.62       | 60 | 60 | 10 | 3.8 | 6501.34       | 90 | 60 | 10 | 3.8 | 6440.51       |
| 0 | 60 | 10 | 3.9 | 4808.50       | 30   | 60 | 10 | 3.9 | 4802.19       | 60 | 60 | 10 | 3.9 | 4776.71       | 90 | 60 | 10 | 3.9 | 4723.78       |
| 0 | 60 | 10 | 4   | 3508.99       | 30   | 60 | 10 | 4   | 3502.60       | 60 | 60 | 10 | 4   | 3478.69       | 90 | 60 | 10 | 4   | 3431.76       |
| 0 | 60 | 10 | 4.1 | 2537.49       | 30   | 60 | 10 | 4.1 | 2531.16       | 60 | 60 | 10 | 4.1 | 2508.76       | 90 | 60 | 10 | 4.1 | 2466.74       |
| 0 | 60 | 10 | 4.2 | 1816.86       | 30   | 60 | 10 | 4.2 | 1810.73       | 60 | 60 | 10 | 4.2 | 1789.87       | 90 | 60 | 10 | 4.2 | 1752.14       |
| 0 | 60 | 10 | 4.3 | 1287.05       | 30   | 60 | 10 | 4.3 | 1281.21       | 60 | 60 | 10 | 4.3 | 1261.93       | 90 | 60 | 10 | 4.3 | 1228.07       |
| 0 | 60 | 10 | 4.4 | 900.09        | 30   | 60 | 10 | 4.4 | 894.62        | 60 | 60 | 10 | 4.4 | 876.97        | 90 | 60 | 10 | 4.4 | 846.69        |
| 0 | 60 | 10 | 4.5 | 620.06        | 30   | 60 | 10 | 4.5 | 615.01        | 60 | 60 | 10 | 4.5 | 599.00        | 90 | 60 | 10 | 4.5 | 572.06        |
| 0 | 60 | 10 | 4.6 | 418.93        | 30   | 60 | 10 | 4.6 | 414.32        | 60 | 60 | 10 | 4.6 | 399.92        | 90 | 60 | 10 | 4.6 | 376.05        |
| 0 | 60 | 10 | 4.7 | 275.71        | 30   | 60 | 10 | 4.7 | 271.54        | 60 | 60 | 10 | 4.7 | 258.67        | 90 | 60 | 10 | 4.7 | 237.60        |
| 0 | 60 | 10 | 4.8 | 175.04        | 30   | 60 | 10 | 4.8 | 171.29        | 60 | 60 | 10 | 4.8 | 159.81        | 90 | 60 | 10 | 4.8 | 141.24        |
| 0 | 60 | 10 | 4.9 | 105.13        | 30   | 60 | 10 | 4.9 | 101.77        | 60 | 60 | 10 | 4.9 | 91.55         | 90 | 60 | 10 | 4.9 | 75.18         |
| 0 | 60 | 10 | 5   | 57.47         | 30   | 60 | 10 | 5   | 54.46         | 60 | 60 | 10 | 5   | 45.37         | 90 | 60 | 10 | 5   | 30.95         |
| 0 | 60 | 10 | 5.1 | 25.55         | 30   | 60 | 10 | 5.1 | 22.86         | 60 | 60 | 10 | 5.1 | 14.79         | 90 | 60 | 10 | 5.1 | 2.07          |
| 0 | 60 | 10 | 5.2 | 4.75          | 30   | 60 | 10 | 5.2 | 2.36          | 60 | 60 | 10 | 5.2 | -4.79         | 90 | 60 | 10 | 5.2 | -15.99        |
| 0 | 60 | 10 | 5.3 | -8.30         | 30   | 60 | 10 | 5.3 | -10.43        | 60 | 60 | 10 | 5.3 | -16.76        | 90 | 60 | 10 | 5.3 | -26.63        |
| 0 | 60 | 10 | 5.4 | -16.05        | 30   | 60 | 10 | 5.4 | -17.94        | 60 | 60 | 10 | 5.4 | -23.54        | 90 | 60 | 10 | 5.4 | -32.25        |
| 0 | 60 | 10 | 5.5 | -20.14        | 30   | 60 | 10 | 5.5 | -21.82        | 60 | 60 | 10 | 5.5 | -26.79        | 90 | 60 | 10 | 5.5 | -34.48        |
| 0 | 60 | 10 | 5.6 | -21.87        | 30   | 60 | 10 | 5.6 | <b>-23.37</b> | 60 | 60 | 10 | 5.6 | <b>-27.78</b> | 90 | 60 | 10 | 5.6 | <b>-34.58</b> |
| 0 | 60 | 10 | 5.7 | <b>-22.02</b> | 30   | 60 | 10 | 5.7 | -23.35        | 60 | 60 | 10 | 5.7 | -27.27        | 90 | 60 | 10 | 5.7 | -33.31        |
| 0 | 60 | 10 | 5.8 | -21.22        | 30   | 60 | 10 | 5.8 | -22.41        | 60 | 60 | 10 | 5.8 | -25.90        | 90 | 60 | 10 | 5.8 | -31.26        |
| 0 | 60 | 10 | 5.9 | -19.87        | 30   | 60 | 10 | 5.9 | -20.94        | 60 | 60 | 10 | 5.9 | -24.06        | 90 | 60 | 10 | 5.9 | -28.83        |
| 0 | 60 | 10 | 6   | -18.22        | 30   | 60 | 10 | 6   | -19.18        | 60 | 60 | 10 | 6   | -21.97        | 90 | 60 | 10 | 6   | -26.23        |
| 0 | 60 | 10 | 6.5 | -10.16        | 30   | 60 | 10 | 6.5 | -10.72        | 60 | 60 | 10 | 6.5 | -12.37        | 90 | 60 | 10 | 6.5 | -14.86        |
| 0 | 60 | 10 | 7   | -5.17         | 30   | 60 | 10 | 7   | -5.53         | 60 | 60 | 10 | 7   | -6.55         | 90 | 60 | 10 | 7   | -8.09         |
| 0 | 60 | 10 | 7.5 | -2.62         | 30   | 60 | 10 | 7.5 | -2.84         | 60 | 60 | 10 | 7.5 | -3.51         | 90 | 60 | 10 | 7.5 | -4.51         |
| 0 | 60 | 10 | 8   | -1.35         | 30   | 60 | 10 | 8   | -1.51         | 60 | 60 | 10 | 8   | -1.96         | 90 | 60 | 10 | 8   | -2.62         |
| 0 | 60 | 10 | 8.5 | -0.71         | 30   | 60 | 10 | 8.5 | -0.82         | 60 | 60 | 10 | 8.5 | -1.13         | 90 | 60 | 10 | 8.5 | -1.59         |
| 0 | 60 | 10 | 9   | -0.37         | 30   | 60 | 10 | 9   | -0.45         | 60 | 60 | 10 | 9   | -0.68         | 90 | 60 | 10 | 9   | -1.00         |
| 0 | 60 | 10 | 9.5 | -0.19         | 30   | 60 | 10 | 9.5 | -0.25         | 60 | 60 | 10 | 9.5 | -0.41         | 90 | 60 | 10 | 9.5 | -0.65         |
| 0 | 60 | 10 | 10  | -0.09         | 30   | 60 | 10 | 10  | -0.13         | 60 | 60 | 10 | 10  | -0.25         | 90 | 60 | 10 | 10  | -0.43         |
| 0 | 60 | 10 | 12  | 0.02          | 30   | 60 | 10 | 12  | 0.00          | 60 | 60 | 10 | 12  | -0.04         | 90 | 60 | 10 | 12  | -0.10         |
| 0 | 60 | 10 | 15  | 0.02          | 30   | 60 | 10 | 15  | 0.01          | 60 | 60 | 10 | 15  | 0.00          | 90 | 60 | 10 | 15  | -0.01         |
| 0 | 60 | 10 | 20  | 0.00          | 30   | 60 | 10 | 20  | 0.00          | 60 | 60 | 10 | 20  | 0.00          | 90 | 60 | 10 | 20  | 0.00          |
| 0 | 60 | 20 | 2.5 | 40929.09      | 30   | 60 | 20 | 2.5 | 41631.09      | 60 | 60 | 20 | 2.5 | 45540.34      | 90 | 60 | 20 | 2.5 | 54741.63      |
| 0 | 60 | 20 | 2.6 | 36970.51      | 30   | 60 | 20 | 2.6 | 38119.45      | 60 | 60 | 20 | 2.6 | 42048.51      | 90 | 60 | 20 | 2.6 | 47609.40      |
| 0 | 60 | 20 | 2.7 | 34524.96      | 30</ |    |    |     |               |    |    |    |     |               |    |    |    |     |               |

|   |    |    |     |          |    |    |    |     |          |    |    |    |     |          |    |    |    |     |          |
|---|----|----|-----|----------|----|----|----|-----|----------|----|----|----|-----|----------|----|----|----|-----|----------|
| 0 | 60 | 20 | 4.5 | 339.27   | 30 | 60 | 20 | 4.5 | 335.92   | 60 | 60 | 20 | 4.5 | 321.48   | 90 | 60 | 20 | 4.5 | 288.58   |
| 0 | 60 | 20 | 4.6 | 225.90   | 30 | 60 | 20 | 4.6 | 222.52   | 60 | 60 | 20 | 4.6 | 208.79   | 90 | 60 | 20 | 4.6 | 178.96   |
| 0 | 60 | 20 | 4.7 | 145.40   | 30 | 60 | 20 | 4.7 | 142.11   | 60 | 60 | 20 | 4.7 | 129.26   | 90 | 60 | 20 | 4.7 | 102.36   |
| 0 | 60 | 20 | 4.8 | 89.07    | 30 | 60 | 20 | 4.8 | 85.93    | 60 | 60 | 20 | 4.8 | 74.06    | 90 | 60 | 20 | 4.8 | 49.92    |
| 0 | 60 | 20 | 4.9 | 50.19    | 30 | 60 | 20 | 4.9 | 47.24    | 60 | 60 | 20 | 4.9 | 36.40    | 90 | 60 | 20 | 4.9 | 14.81    |
| 0 | 60 | 20 | 5   | 23.91    | 30 | 60 | 20 | 5   | 21.20    | 60 | 60 | 20 | 5   | 11.37    | 90 | 60 | 20 | 5   | -7.87    |
| 0 | 60 | 20 | 5.1 | 6.59     | 30 | 60 | 20 | 5.1 | 4.10     | 60 | 60 | 20 | 5.1 | -4.78    | 90 | 60 | 20 | 5.1 | -21.90   |
| 0 | 60 | 20 | 5.2 | -4.38    | 30 | 60 | 20 | 5.2 | -6.65    | 60 | 60 | 20 | 5.2 | -14.66   | 90 | 60 | 20 | 5.2 | -29.88   |
| 0 | 60 | 20 | 5.3 | -10.95   | 30 | 60 | 20 | 5.3 | -13.02   | 60 | 60 | 20 | 5.3 | -20.24   | 90 | 60 | 20 | 5.3 | -33.79   |
| 0 | 60 | 20 | 5.4 | -14.51   | 30 | 60 | 20 | 5.4 | -16.40   | 60 | 60 | 20 | 5.4 | -22.92   | 90 | 60 | 20 | 5.4 | -34.99   |
| 0 | 60 | 20 | 5.5 | -16.04   | 30 | 60 | 20 | 5.5 | -17.77   | 60 | 60 | 20 | 5.5 | -23.65   | 90 | 60 | 20 | 5.5 | -34.42   |
| 0 | 60 | 20 | 5.6 | -16.29   | 30 | 60 | 20 | 5.6 | -17.87   | 60 | 60 | 20 | 5.6 | -23.19   | 90 | 60 | 20 | 5.6 | -32.81   |
| 0 | 60 | 20 | 5.7 | -15.72   | 30 | 60 | 20 | 5.7 | -17.16   | 60 | 60 | 20 | 5.7 | -21.96   | 90 | 60 | 20 | 5.7 | -30.58   |
| 0 | 60 | 20 | 5.8 | -14.68   | 30 | 60 | 20 | 5.8 | -16.00   | 60 | 60 | 20 | 5.8 | -20.34   | 90 | 60 | 20 | 5.8 | -28.07   |
| 0 | 60 | 20 | 5.9 | -13.41   | 30 | 60 | 20 | 5.9 | -14.61   | 60 | 60 | 20 | 5.9 | -18.55   | 90 | 60 | 20 | 5.9 | -25.50   |
| 0 | 60 | 20 | 6   | -12.03   | 30 | 60 | 20 | 6   | -13.13   | 60 | 60 | 20 | 6   | -16.70   | 90 | 60 | 20 | 6   | -22.95   |
| 0 | 60 | 20 | 6.5 | -6.07    | 30 | 60 | 20 | 6.5 | -6.77    | 60 | 60 | 20 | 6.5 | -9.01    | 90 | 60 | 20 | 6.5 | -12.80   |
| 0 | 60 | 20 | 7   | -2.70    | 30 | 60 | 20 | 7   | -3.16    | 60 | 60 | 20 | 7   | -4.61    | 90 | 60 | 20 | 7   | -7.01    |
| 0 | 60 | 20 | 7.5 | -1.09    | 30 | 60 | 20 | 7.5 | -1.40    | 60 | 60 | 20 | 7.5 | -2.37    | 90 | 60 | 20 | 7.5 | -3.96    |
| 0 | 60 | 20 | 8   | -0.36    | 30 | 60 | 20 | 8   | -0.58    | 60 | 60 | 20 | 8   | -1.26    | 90 | 60 | 20 | 8   | -2.34    |
| 0 | 60 | 20 | 8.5 | -0.04    | 30 | 60 | 20 | 8.5 | -0.20    | 60 | 60 | 20 | 8.5 | -0.68    | 90 | 60 | 20 | 8.5 | -1.44    |
| 0 | 60 | 20 | 9   | 0.10     | 30 | 60 | 20 | 9   | -0.02    | 60 | 60 | 20 | 9   | -0.37    | 90 | 60 | 20 | 9   | -0.91    |
| 0 | 60 | 20 | 9.5 | 0.15     | 30 | 60 | 20 | 9.5 | 0.06     | 60 | 60 | 20 | 9.5 | -0.20    | 90 | 60 | 20 | 9.5 | -0.59    |
| 0 | 60 | 20 | 10  | 0.16     | 30 | 60 | 20 | 10  | 0.10     | 60 | 60 | 20 | 10  | -0.10    | 90 | 60 | 20 | 10  | -0.40    |
| 0 | 60 | 20 | 12  | 0.11     | 30 | 60 | 20 | 12  | 0.08     | 60 | 60 | 20 | 12  | 0.01     | 90 | 60 | 20 | 12  | -0.09    |
| 0 | 60 | 20 | 15  | 0.04     | 30 | 60 | 20 | 15  | 0.03     | 60 | 60 | 20 | 15  | 0.01     | 90 | 60 | 20 | 15  | -0.01    |
| 0 | 60 | 20 | 20  | 0.00     | 30 | 60 | 20 | 20  | 0.00     | 60 | 60 | 20 | 20  | 0.00     | 90 | 60 | 20 | 20  | 0.00     |
| 0 | 60 | 30 | 2.5 | 25122.76 | 30 | 60 | 30 | 2.5 | 25469.92 | 60 | 60 | 30 | 2.5 | 26452.49 | 90 | 60 | 30 | 2.5 | 27965.72 |
| 0 | 60 | 30 | 2.6 | 21761.66 | 30 | 60 | 30 | 2.6 | 22118.94 | 60 | 60 | 30 | 2.6 | 23035.71 | 90 | 60 | 30 | 2.6 | 24062.51 |
| 0 | 60 | 30 | 2.7 | 18758.26 | 30 | 60 | 30 | 2.7 | 19079.55 | 60 | 60 | 30 | 2.7 | 19827.71 | 90 | 60 | 30 | 2.7 | 20530.02 |
| 0 | 60 | 30 | 2.8 | 15997.09 | 30 | 60 | 30 | 2.8 | 16255.36 | 60 | 60 | 30 | 2.8 | 16825.61 | 90 | 60 | 30 | 2.8 | 17281.56 |
| 0 | 60 | 30 | 2.9 | 13435.30 | 30 | 60 | 30 | 2.9 | 13631.80 | 60 | 60 | 30 | 2.9 | 14052.25 | 90 | 60 | 30 | 2.9 | 14349.26 |
| 0 | 60 | 30 | 3   | 11100.00 | 30 | 60 | 30 | 3   | 11246.08 | 60 | 60 | 30 | 3   | 11552.43 | 90 | 60 | 30 | 3   | 11747.81 |
| 0 | 60 | 30 | 3.1 | 9021.79  | 30 | 60 | 30 | 3.1 | 9129.78  | 60 | 60 | 30 | 3.1 | 9352.55  | 90 | 60 | 30 | 3.1 | 9481.03  |
| 0 | 60 | 30 | 3.2 | 7218.83  | 30 | 60 | 30 | 3.2 | 7298.85  | 60 | 60 | 30 | 3.2 | 7460.87  | 90 | 60 | 30 | 3.2 | 7543.06  |
| 0 | 60 | 30 | 3.3 | 5695.27  | 30 | 60 | 30 | 3.3 | 5754.86  | 60 | 60 | 30 | 3.3 | 5872.44  | 90 | 60 | 30 | 3.3 | 5921.20  |
| 0 | 60 | 30 | 3.4 | 4431.45  | 30 | 60 | 30 | 3.4 | 4475.94  | 60 | 60 | 30 | 3.4 | 4560.48  | 90 | 60 | 30 | 3.4 | 4584.39  |
| 0 | 60 | 30 | 3.5 | 3404.54  | 30 | 60 | 30 | 3.5 | 3437.73  | 60 | 60 | 30 | 3.5 | 3497.51  | 90 | 60 | 30 | 3.5 | 3502.99  |
| 0 | 60 | 30 | 3.6 | 2583.40  | 30 | 60 | 30 | 3.6 | 2608.04  | 60 | 60 | 30 | 3.6 | 2649.17  | 90 | 60 | 30 | 3.6 | 2641.25  |
| 0 | 60 | 30 | 3.7 | 1935.94  | 30 | 60 | 30 | 3.7 | 1954.05  | 60 | 60 | 30 | 3.7 | 1981.23  | 90 | 60 | 30 | 3.7 | 1963.93  |
| 0 | 60 | 30 | 3.8 | 1433.24  | 30 | 60 | 30 | 3.8 | 1446.37  | 60 | 60 | 30 | 3.8 | 1463.22  | 90 | 60 | 30 | 3.8 | 1439.70  |
| 0 | 60 | 30 | 3.9 | 1046.58  | 30 | 60 | 30 | 3.9 | 1055.92  | 60 | 60 | 30 | 3.9 | 1065.18  | 90 | 60 | 30 | 3.9 | 1037.86  |
| 0 | 60 | 30 | 4   | 753.37   | 30 | 60 | 30 | 4   | 759.85   | 60 | 60 | 30 | 4   | 763.63   | 90 | 60 | 30 | 4   | 734.34   |
| 0 | 60 | 30 | 4.1 | 533.46   | 30 | 60 | 30 | 4.1 | 537.78   | 60 | 60 | 30 | 4.1 | 537.60   | 90 | 60 | 30 | 4.1 | 507.64   |
| 0 | 60 | 30 | 4.2 | 370.49   | 30 | 60 | 30 | 4.2 | 373.18   | 60 | 60 | 30 | 4.2 | 370.19   | 90 | 60 | 30 | 4.2 | 340.53   |
| 0 | 60 | 30 | 4.3 | 251.33   | 30 | 60 | 30 | 4.3 | 252.80   | 60 | 60 | 30 | 4.3 | 247.86   | 90 | 60 | 30 | 4.3 | 219.18   |
| 0 | 60 | 30 | 4.4 | 165.12   | 30 | 60 | 30 | 4.4 | 165.70   | 60 | 60 | 30 | 4.4 | 159.55   | 90 | 60 | 30 | 4.4 | 132.31   |
| 0 | 60 | 30 | 4.5 | 103.56   | 30 | 60 | 30 | 4.5 | 103.54   | 60 | 60 | 30 | 4.5 | 96.77    | 90 | 60 | 30 | 4.5 | 71.33    |
| 0 | 60 | 30 | 4.6 | 60.18    | 30 | 60 | 30 | 4.6 | 59.79    | 60 | 60 | 30 | 4.6 | 52.84    | 90 | 60 | 30 | 4.6 | 29.36    |
| 0 | 60 | 30 | 4.7 | 30.20    | 30 | 60 | 30 | 4.7 | 29.57    | 60 | 60 | 30 | 4.7 | 22.74    | 90 | 60 | 30 | 4.7 | 1.26     |
| 0 | 60 | 30 | 4.8 | 10.08    | 30 | 60 | 30 | 4.8 | 9.30     | 60 | 60 | 30 | 4.8 | 2.72     | 90 | 60 | 30 | 4.8 | -16.83   |
| 0 | 60 | 30 | 4.9 | -2.93    | 30 | 60 | 30 | 4.9 | -3.81    | 60 | 60 | 30 | 4.9 | -10.08   | 90 | 60 | 30 | 4.9 | -27.82   |
| 0 | 60 | 30 | 5   | -10.86   | 30 | 60 | 30 | 5   | -11.80   | 60 | 60 | 30 | 5   | -17.73   | 90 | 60 | 30 | 5   | -33.81   |
| 0 | 60 | 30 | 5.1 | -15.28   | 30 | 60 | 30 | 5.1 | -16.25   | 60 | 60 | 30 | 5.1 | -21.85   | 90 | 60 | 30 | 5.1 | -36.42   |
| 0 | 60 | 30 | 5.2 | -17.30   | 30 | 60 | 30 | 5.2 | -18.30   | 60 | 60 | 30 | 5.2 | -23.55   | 90 | 60 | 30 | 5.2 | -36.74   |
| 0 | 60 | 30 | 5.3 | -17.77   | 30 | 60 | 30 | 5.3 | -18.77   | 60 | 60 | 30 | 5.3 | -23.68   | 90 | 60 | 30 | 5.3 | -35.62   |
| 0 | 60 | 30 | 5.4 | -17.27   | 30 | 60 | 30 | 5.4 | -18.24   | 60 | 60 | 30 | 5.4 | -22.84   | 90 | 60 | 30 | 5.4 | -33.64   |
| 0 | 60 | 30 | 5.5 | -16.16   | 30 | 60 | 30 | 5.5 | -17.11   | 60 | 60 | 30 | 5.5 | -21.38   | 90 | 60 | 30 | 5.5 | -31.17   |
| 0 | 60 | 30 | 5.6 | -14.76   | 30 | 60 | 30 | 5.6 | -15.68   | 60 | 60 | 30 | 5.6 | -19.65   | 90 | 60 | 30 | 5.6 | -28.52   |
| 0 | 60 | 30 | 5.7 | -13.23   | 30 | 60 | 30 | 5.7 | -14.10   | 60 | 60 | 30 | 5.7 | -17.77   | 90 | 60 | 30 | 5.7 | -25.82   |
| 0 | 60 | 30 | 5.8 | -11.69   | 30 | 60 | 30 | 5.8 | -12.52   | 60 | 60 | 30 | 5.8 | -15.92   | 90 | 60 | 30 | 5.8 | -23.22   |
| 0 | 60 | 30 | 5.9 | -10.22   | 30 | 60 | 30 | 5.9 | -11.01   | 60 | 60 | 30 | 5.9 | -14.15   | 90 | 60 | 30 | 5.9 | -20.79   |
| 0 | 60 | 30 | 6   | -8.85    | 30 | 60 | 30 | 6   | -9.59    | 60 | 60 | 30 | 6   | -12.49   | 90 | 60 | 30 | 6   | -18.53   |
| 0 | 60 | 30 | 6.5 | -3.90    | 30 | 60 | 30 | 6.5 | -4.43    | 60 | 60 | 30 | 6.5 | -6.38    | 90 | 60 | 30 | 6.5 | -10.23   |
| 0 | 60 | 30 | 7   | -1.44    | 30 | 60 | 30 | 7   | -1.82    | 60 | 60 | 30 | 7   | -3.16    | 90 | 60 | 30 | 7   | -5.70    |
| 0 | 60 | 30 | 7.5 | -0.35    | 30 | 60 | 30 | 7.5 | -0.63    | 60 | 60 | 30 | 7.5 | -1.57    | 90 | 60 | 30 | 7.5 | -3.29    |
| 0 | 60 | 30 | 8   | 0.10     | 30 | 60 | 30 | 8   | -0.10    | 60 | 60 | 30 | 8   | -0.78    | 90 | 60 | 30 | 8   | -1.99    |
| 0 | 60 | 30 | 8.5 | 0.26     | 30 | 60 | 30 | 8.5 | 0.12     | 60 | 60 | 30 | 8.5 | -0.38    | 90 | 60 | 30 | 8.5 | -1.24    |
| 0 | 60 | 30 | 9   | 0.31     | 30 | 60 | 30 | 9   | 0.20     | 60 | 60 | 30 | 9   | -0.17    | 90 | 60 | 30 | 9   | -0.80    |
| 0 | 60 | 30 | 9.5 | 0.30     | 30 | 60 | 30 | 9.5 | 0.22     | 60 | 60 | 30 | 9.5 | -0.06    | 90 | 60 | 30 | 9.5 | -0.53    |
| 0 | 60 | 30 | 10  | 0.27     | 30 | 60 | 30 | 10  | 0.21     | 60 | 60 | 30 | 10  | -0.02    | 90 | 60 | 30 | 10  | -0.36    |
| 0 | 60 | 30 | 12  | 0.15     | 30 | 60 | 30 | 12  | 0.12     | 60 | 60 | 30 | 12  | 0.04     | 90 | 60 | 30 | 12  | -0.09    |
| 0 | 60 | 30 | 15  | 0.05     | 30 | 60 | 30 | 15  | 0.04     | 60 | 60 | 30 | 15  | 0.02     | 90 | 60 | 30 | 15  | -0.01    |
| 0 | 60 | 30 | 20  | 0.00     | 30 | 60 | 30 | 20  | 0.00     | 60 | 60 | 30 | 20  | 0.00     | 90 | 60 | 30 | 20  | 0.00     |
| 0 | 60 | 40 | 2.5 | 14019.80 | 30 | 60 | 40 | 2.5 | 14082.02 | 60 | 60 | 40 | 2.5 | 14304.97 | 90 | 60 | 40 | 2.5 | 14783.58 |
| 0 | 60 | 40 | 2.6 | 11249.45 | 30 | 60 | 40 | 2.6 | 11330.10 | 60 | 60 | 40 | 2.6 | 11565.26 | 90 | 60 | 40 | 2.6 | 11960.38 |
| 0 | 60 | 40 | 2.7 | 8992.00  | 30 | 60 | 40 | 2.7 | 9074.76  | 60 | 60 | 40 | 2.7 | 9295.29  | 90 | 60 | 40 | 2.7 | 9611.63  |
| 0 | 60 | 40 | 2.8 | 7150.01  |    |    |    |     |          |    |    |    |     |          |    |    |    |     |          |

|   |    |    |     |               |    |    |    |     |               |    |    |    |     |               |    |    |    |     |               |
|---|----|----|-----|---------------|----|----|----|-----|---------------|----|----|----|-----|---------------|----|----|----|-----|---------------|
| 0 | 60 | 40 | 4.6 | -19.95        | 30 | 60 | 40 | 4.6 | -18.72        | 60 | 60 | 40 | 4.6 | -20.40        | 90 | 60 | 40 | 4.6 | -35.05        |
| 0 | 60 | 40 | 4.7 | -24.85        | 30 | 60 | 40 | 4.7 | -23.95        | 60 | 60 | 40 | 4.7 | -25.98        | 90 | 60 | 40 | 4.7 | -39.67        |
| 0 | 60 | 40 | 4.8 | -26.91        | 30 | 60 | 40 | 4.8 | -26.29        | 60 | 60 | 40 | 4.8 | -28.55        | 90 | 60 | 40 | 4.8 | -41.29        |
| 0 | 60 | 40 | 4.9 | <b>-27.08</b> | 30 | 60 | 40 | 4.9 | <b>-26.69</b> | 60 | 60 | 40 | 4.9 | <b>-29.12</b> | 90 | 60 | 40 | 4.9 | -40.93        |
| 0 | 60 | 40 | 5   | -26.05        | 30 | 60 | 40 | 5   | -25.83        | 60 | 60 | 40 | 5   | -28.35        | 90 | 60 | 40 | 5   | -39.26        |
| 0 | 60 | 40 | 5.1 | -24.31        | 30 | 60 | 40 | 5.1 | -24.25        | 60 | 60 | 40 | 5.1 | -26.80        | 90 | 60 | 40 | 5.1 | -36.87        |
| 0 | 60 | 40 | 5.2 | -22.19        | 30 | 60 | 40 | 5.2 | -22.24        | 60 | 60 | 40 | 5.2 | -24.78        | 90 | 60 | 40 | 5.2 | -34.05        |
| 0 | 60 | 40 | 5.3 | -19.93        | 30 | 60 | 40 | 5.3 | -20.07        | 60 | 60 | 40 | 5.3 | -22.57        | 90 | 60 | 40 | 5.3 | -31.09        |
| 0 | 60 | 40 | 5.4 | -17.68        | 30 | 60 | 40 | 5.4 | -17.88        | 60 | 60 | 40 | 5.4 | -20.31        | 90 | 60 | 40 | 5.4 | -28.15        |
| 0 | 60 | 40 | 5.5 | -15.52        | 30 | 60 | 40 | 5.5 | -15.77        | 60 | 60 | 40 | 5.5 | -18.11        | 90 | 60 | 40 | 5.5 | -25.30        |
| 0 | 60 | 40 | 5.6 | -13.53        | 30 | 60 | 40 | 5.6 | -13.81        | 60 | 60 | 40 | 5.6 | -16.05        | 90 | 60 | 40 | 5.6 | -22.66        |
| 0 | 60 | 40 | 5.7 | -11.70        | 30 | 60 | 40 | 5.7 | -12.00        | 60 | 60 | 40 | 5.7 | -14.13        | 90 | 60 | 40 | 5.7 | -20.20        |
| 0 | 60 | 40 | 5.8 | -10.07        | 30 | 60 | 40 | 5.8 | -10.38        | 60 | 60 | 40 | 5.8 | -12.40        | 90 | 60 | 40 | 5.8 | -17.98        |
| 0 | 60 | 40 | 5.9 | -8.63         | 30 | 60 | 40 | 5.9 | -8.95         | 60 | 60 | 40 | 5.9 | -10.86        | 90 | 60 | 40 | 5.9 | -15.99        |
| 0 | 60 | 40 | 6   | -7.36         | 30 | 60 | 40 | 6   | -7.67         | 60 | 60 | 40 | 6   | -9.47         | 90 | 60 | 40 | 6   | -14.20        |
| 0 | 60 | 40 | 6.5 | -3.10         | 30 | 60 | 40 | 6.5 | -3.38         | 60 | 60 | 40 | 6.5 | -4.71         | 90 | 60 | 40 | 6.5 | -7.89         |
| 0 | 60 | 40 | 7   | -1.12         | 30 | 60 | 40 | 7   | -1.35         | 60 | 60 | 40 | 7   | -2.32         | 90 | 60 | 40 | 7   | -4.51         |
| 0 | 60 | 40 | 7.5 | -0.24         | 30 | 60 | 40 | 7.5 | -0.42         | 60 | 60 | 40 | 7.5 | -1.15         | 90 | 60 | 40 | 7.5 | -2.68         |
| 0 | 60 | 40 | 8   | 0.13          | 30 | 60 | 40 | 8   | -0.02         | 60 | 60 | 40 | 8   | -0.55         | 90 | 60 | 40 | 8   | -1.66         |
| 0 | 60 | 40 | 8.5 | 0.26          | 30 | 60 | 40 | 8.5 | 0.15          | 60 | 60 | 40 | 8.5 | -0.25         | 90 | 60 | 40 | 8.5 | -1.06         |
| 0 | 60 | 40 | 9   | 0.30          | 30 | 60 | 40 | 9   | 0.22          | 60 | 60 | 40 | 9   | -0.09         | 90 | 60 | 40 | 9   | -0.69         |
| 0 | 60 | 40 | 9.5 | 0.29          | 30 | 60 | 40 | 9.5 | 0.22          | 60 | 60 | 40 | 9.5 | -0.01         | 90 | 60 | 40 | 9.5 | -0.47         |
| 0 | 60 | 40 | 10  | 0.27          | 30 | 60 | 40 | 10  | 0.21          | 60 | 60 | 40 | 10  | 0.03          | 90 | 60 | 40 | 10  | -0.32         |
| 0 | 60 | 40 | 12  | 0.14          | 30 | 60 | 40 | 12  | 0.12          | 60 | 60 | 40 | 12  | 0.05          | 90 | 60 | 40 | 12  | -0.08         |
| 0 | 60 | 40 | 15  | 0.05          | 30 | 60 | 40 | 15  | 0.04          | 60 | 60 | 40 | 15  | 0.02          | 90 | 60 | 40 | 15  | -0.01         |
| 0 | 60 | 40 | 20  | 0.00          | 30 | 60 | 40 | 20  | 0.00          | 60 | 60 | 40 | 20  | 0.00          | 90 | 60 | 40 | 20  | 0.00          |
| 0 | 60 | 50 | 2.5 | 7021.40       | 30 | 60 | 50 | 2.5 | 7027.00       | 60 | 60 | 50 | 2.5 | 7085.13       | 90 | 60 | 50 | 2.5 | 7297.82       |
| 0 | 60 | 50 | 2.6 | 5317.44       | 30 | 60 | 50 | 2.6 | 5335.85       | 60 | 60 | 50 | 2.6 | 5408.97       | 90 | 60 | 50 | 2.6 | 5587.20       |
| 0 | 60 | 50 | 2.7 | 4002.17       | 30 | 60 | 50 | 2.7 | 4026.75       | 60 | 60 | 50 | 2.7 | 4103.34       | 90 | 60 | 50 | 2.7 | 4248.06       |
| 0 | 60 | 50 | 2.8 | 2991.84       | 30 | 60 | 50 | 2.8 | 3018.50       | 60 | 60 | 50 | 2.8 | 3091.96       | 90 | 60 | 50 | 2.8 | 3206.32       |
| 0 | 60 | 50 | 2.9 | 2215.95       | 30 | 60 | 50 | 2.9 | 2242.28       | 60 | 60 | 50 | 2.9 | 2309.19       | 90 | 60 | 50 | 2.9 | 2397.09       |
| 0 | 60 | 50 | 3   | 1623.72       | 30 | 60 | 50 | 3   | 1648.41       | 60 | 60 | 50 | 3   | 1707.31       | 90 | 60 | 50 | 3   | 1772.92       |
| 0 | 60 | 50 | 3.1 | 1173.80       | 30 | 60 | 50 | 3.1 | 1196.26       | 60 | 60 | 50 | 3.1 | 1246.88       | 90 | 60 | 50 | 3.1 | 1294.21       |
| 0 | 60 | 50 | 3.2 | 833.99        | 30 | 60 | 50 | 3.2 | 854.00        | 60 | 60 | 50 | 3.2 | 896.74        | 90 | 60 | 50 | 3.2 | 929.39        |
| 0 | 60 | 50 | 3.3 | 579.98        | 30 | 60 | 50 | 3.3 | 597.53        | 60 | 60 | 50 | 3.3 | 633.09        | 90 | 60 | 50 | 3.3 | 654.21        |
| 0 | 60 | 50 | 3.4 | 391.43        | 30 | 60 | 50 | 3.4 | 406.62        | 60 | 60 | 50 | 3.4 | 435.77        | 90 | 60 | 50 | 3.4 | 447.96        |
| 0 | 60 | 50 | 3.5 | 253.41        | 30 | 60 | 50 | 3.5 | 266.39        | 60 | 60 | 50 | 3.5 | 289.96        | 90 | 60 | 50 | 3.5 | 295.36        |
| 0 | 60 | 50 | 3.6 | 153.82        | 30 | 60 | 50 | 3.6 | 164.77        | 60 | 60 | 50 | 3.6 | 183.53        | 90 | 60 | 50 | 3.6 | 183.86        |
| 0 | 60 | 50 | 3.7 | 83.11         | 30 | 60 | 50 | 3.7 | 92.25         | 60 | 60 | 50 | 3.7 | 106.94        | 90 | 60 | 50 | 3.7 | 103.59        |
| 0 | 60 | 50 | 3.8 | 34.04         | 30 | 60 | 50 | 3.8 | 41.59         | 60 | 60 | 50 | 3.8 | 52.92         | 90 | 60 | 50 | 3.8 | 46.98         |
| 0 | 60 | 50 | 3.9 | 0.80          | 30 | 60 | 50 | 3.9 | 7.00          | 60 | 60 | 50 | 3.9 | 15.58         | 90 | 60 | 50 | 3.9 | 7.90          |
| 0 | 60 | 50 | 4   | -20.84        | 30 | 60 | 50 | 4   | -15.76        | 60 | 60 | 50 | 4   | -9.36         | 90 | 60 | 50 | 4   | -18.11        |
| 0 | 60 | 50 | 4.1 | -34.12        | 30 | 60 | 50 | 4.1 | -29.98        | 60 | 60 | 50 | 4.1 | -25.28        | 90 | 60 | 50 | 4.1 | -34.61        |
| 0 | 60 | 50 | 4.2 | -41.47        | 30 | 60 | 50 | 4.2 | -38.08        | 60 | 60 | 50 | 4.2 | -34.70        | 90 | 60 | 50 | 4.2 | -44.24        |
| 0 | 60 | 50 | 4.3 | -44.69        | 30 | 60 | 50 | 4.3 | -41.89        | 60 | 60 | 50 | 4.3 | -39.54        | 90 | 60 | 50 | 4.3 | -49.03        |
| 0 | 60 | 50 | 4.4 | <b>-45.09</b> | 30 | 60 | 50 | 4.4 | <b>-42.79</b> | 60 | 60 | 50 | 4.4 | <b>-41.23</b> | 90 | 60 | 50 | 4.4 | <b>-50.50</b> |
| 0 | 60 | 50 | 4.5 | -43.65        | 30 | 60 | 50 | 4.5 | -41.76        | 60 | 60 | 50 | 4.5 | -40.81        | 90 | 60 | 50 | 4.5 | -49.74        |
| 0 | 60 | 50 | 4.6 | -41.08        | 30 | 60 | 50 | 4.6 | -39.53        | 60 | 60 | 50 | 4.6 | -39.07        | 90 | 60 | 50 | 4.6 | -47.59        |
| 0 | 60 | 50 | 4.7 | -37.88        | 30 | 60 | 50 | 4.7 | -36.60        | 60 | 60 | 50 | 4.7 | -36.52        | 90 | 60 | 50 | 4.7 | -44.59        |
| 0 | 60 | 50 | 4.8 | -34.39        | 30 | 60 | 50 | 4.8 | -33.36        | 60 | 60 | 50 | 4.8 | -33.57        | 90 | 60 | 50 | 4.8 | -41.17        |
| 0 | 60 | 50 | 4.9 | -30.87        | 30 | 60 | 50 | 4.9 | -30.03        | 60 | 60 | 50 | 4.9 | -30.47        | 90 | 60 | 50 | 4.9 | -37.61        |
| 0 | 60 | 50 | 5   | -27.45        | 30 | 60 | 50 | 5   | -26.77        | 60 | 60 | 50 | 5   | -27.38        | 90 | 60 | 50 | 5   | -34.06        |
| 0 | 60 | 50 | 5.1 | -24.23        | 30 | 60 | 50 | 5.1 | -23.70        | 60 | 60 | 50 | 5.1 | -24.44        | 90 | 60 | 50 | 5.1 | -30.67        |
| 0 | 60 | 50 | 5.2 | -21.26        | 30 | 60 | 50 | 5.2 | -20.85        | 60 | 60 | 50 | 5.2 | -21.67        | 90 | 60 | 50 | 5.2 | -27.47        |
| 0 | 60 | 50 | 5.3 | -18.57        | 30 | 60 | 50 | 5.3 | -18.25        | 60 | 60 | 50 | 5.3 | -19.13        | 90 | 60 | 50 | 5.3 | -24.54        |
| 0 | 60 | 50 | 5.4 | -16.16        | 30 | 60 | 50 | 5.4 | -15.92        | 60 | 60 | 50 | 5.4 | -16.84        | 90 | 60 | 50 | 5.4 | -21.87        |
| 0 | 60 | 50 | 5.5 | -14.02        | 30 | 60 | 50 | 5.5 | -13.84        | 60 | 60 | 50 | 5.5 | -14.77        | 90 | 60 | 50 | 5.5 | -19.44        |
| 0 | 60 | 50 | 5.6 | -12.13        | 30 | 60 | 50 | 5.6 | -12.00        | 60 | 60 | 50 | 5.6 | -12.94        | 90 | 60 | 50 | 5.6 | -17.29        |
| 0 | 60 | 50 | 5.7 | -10.47        | 30 | 60 | 50 | 5.7 | -10.38        | 60 | 60 | 50 | 5.7 | -11.31        | 90 | 60 | 50 | 5.7 | -15.35        |
| 0 | 60 | 50 | 5.8 | -9.02         | 30 | 60 | 50 | 5.8 | -8.97         | 60 | 60 | 50 | 5.8 | -9.88         | 90 | 60 | 50 | 5.8 | -13.63        |
| 0 | 60 | 50 | 5.9 | -7.76         | 30 | 60 | 50 | 5.9 | -7.74         | 60 | 60 | 50 | 5.9 | -8.63         | 90 | 60 | 50 | 5.9 | -12.13        |
| 0 | 60 | 50 | 6   | -6.66         | 30 | 60 | 50 | 6   | -6.66         | 60 | 60 | 50 | 6   | -7.53         | 90 | 60 | 50 | 6   | -10.78        |
| 0 | 60 | 50 | 6.5 | -3.04         | 30 | 60 | 50 | 6.5 | -3.10         | 60 | 60 | 50 | 6.5 | -3.82         | 90 | 60 | 50 | 6.5 | -6.11         |
| 0 | 60 | 50 | 7   | -1.31         | 30 | 60 | 50 | 7   | -1.39         | 60 | 60 | 50 | 7   | -1.96         | 90 | 60 | 50 | 7   | -3.60         |
| 0 | 60 | 50 | 7.5 | -0.49         | 30 | 60 | 50 | 7.5 | -0.57         | 60 | 60 | 50 | 7.5 | -1.02         | 90 | 60 | 50 | 7.5 | -2.20         |
| 0 | 60 | 50 | 8   | -0.10         | 30 | 60 | 50 | 8   | -0.17         | 60 | 60 | 50 | 8   | -0.52         | 90 | 60 | 50 | 8   | -1.40         |
| 0 | 60 | 50 | 8.5 | 0.07          | 30 | 60 | 50 | 8.5 | 0.02          | 60 | 60 | 50 | 8.5 | -0.26         | 90 | 60 | 50 | 8.5 | -0.91         |
| 0 | 60 | 50 | 9   | 0.15          | 30 | 60 | 50 | 9   | 0.10          | 60 | 60 | 50 | 9   | -0.11         | 90 | 60 | 50 | 9   | -0.61         |
| 0 | 60 | 50 | 9.5 | 0.17          | 30 | 60 | 50 | 9.5 | 0.13          | 60 | 60 | 50 | 9.5 | -0.03         | 90 | 60 | 50 | 9.5 | -0.42         |
| 0 | 60 | 50 | 10  | 0.17          | 30 | 60 | 50 | 10  | 0.14          | 60 | 60 | 50 | 10  | 0.00          | 90 | 60 | 50 | 10  | -0.29         |
| 0 | 60 | 50 | 12  | 0.11          | 30 | 60 | 50 | 12  | 0.09          | 60 | 60 | 50 | 12  | 0.04          | 90 | 60 | 50 | 12  | -0.08         |
| 0 | 60 | 50 | 15  | 0.04          | 30 | 60 | 50 | 15  | 0.04          | 60 | 60 | 50 | 15  | 0.02          | 90 | 60 | 50 | 15  | -0.01         |
| 0 | 60 | 50 | 20  | 0.00          | 30 | 60 | 50 | 20  | 0.00          | 60 | 60 | 50 | 20  | 0.00          | 90 | 60 | 50 | 20  | 0.00          |
| 0 | 60 | 60 | 2.5 | 3270.71       | 30 | 60 | 60 | 2.5 | 3278.15       | 60 | 60 | 60 | 2.5 | 3313.39       | 90 | 60 | 60 | 2.5 | 3408.85       |
| 0 | 60 | 60 | 2.6 | 2347.91       | 30 | 60 | 60 | 2.6 | 2359.78       | 60 | 60 | 60 | 2.6 | 2398.37       | 90 | 60 | 60 | 2.6 | 2475.09       |
| 0 | 60 | 60 | 2.7 | 1660.73       | 30 | 60 | 60 | 2.7 | 1674.62       | 60 | 60 | 60 | 2.7 | 1712.98       | 90 | 60 | 60 | 2.7 | 1773.23       |
| 0 | 60 | 60 | 2.8 | 1153.89       | 30 | 60 | 60 | 2.8 | 1168.32       | 60 | 60 | 60 | 2.8 | 1204.49       | 90 | 60 | 60 | 2.8 | 1250.74       |
| 0 | 60 | 60 | 2.9 | 782.04        | 30 | 60 | 60 | 2.9 | 796.15        | 60 | 60 | 60 | 2.9 | 829.13        |    |    |    |     |               |

|   |    |    |     |         |    |    |    |     |         |    |    |    |     |         |    |    |    |     |         |
|---|----|----|-----|---------|----|----|----|-----|---------|----|----|----|-----|---------|----|----|----|-----|---------|
| 0 | 60 | 60 | 4.7 | -36.39  | 30 | 60 | 60 | 4.7 | -35.09  | 60 | 60 | 60 | 4.7 | -34.04  | 90 | 60 | 60 | 4.7 | -38.47  |
| 0 | 60 | 60 | 4.8 | -32.12  | 30 | 60 | 60 | 4.8 | -31.00  | 60 | 60 | 60 | 4.8 | -30.19  | 90 | 60 | 60 | 4.8 | -34.40  |
| 0 | 60 | 60 | 4.9 | -28.27  | 30 | 60 | 60 | 4.9 | -27.30  | 60 | 60 | 60 | 4.9 | -26.69  | 90 | 60 | 60 | 4.9 | -30.67  |
| 0 | 60 | 60 | 5   | -24.81  | 30 | 60 | 60 | 5   | -23.97  | 60 | 60 | 60 | 5   | -23.52  | 90 | 60 | 60 | 5   | -27.28  |
| 0 | 60 | 60 | 5.1 | -21.74  | 30 | 60 | 60 | 5.1 | -21.01  | 60 | 60 | 60 | 5.1 | -20.70  | 90 | 60 | 60 | 5.1 | -24.24  |
| 0 | 60 | 60 | 5.2 | -19.01  | 30 | 60 | 60 | 5.2 | -18.38  | 60 | 60 | 60 | 5.2 | -18.19  | 90 | 60 | 60 | 5.2 | -21.52  |
| 0 | 60 | 60 | 5.3 | -16.61  | 30 | 60 | 60 | 5.3 | -16.07  | 60 | 60 | 60 | 5.3 | -15.97  | 90 | 60 | 60 | 5.3 | -19.10  |
| 0 | 60 | 60 | 5.4 | -14.52  | 30 | 60 | 60 | 5.4 | -14.05  | 60 | 60 | 60 | 5.4 | -14.02  | 90 | 60 | 60 | 5.4 | -16.96  |
| 0 | 60 | 60 | 5.5 | -12.67  | 30 | 60 | 60 | 5.5 | -12.27  | 60 | 60 | 60 | 5.5 | -12.30  | 90 | 60 | 60 | 5.5 | -15.05  |
| 0 | 60 | 60 | 5.6 | -11.08  | 30 | 60 | 60 | 5.6 | -10.72  | 60 | 60 | 60 | 5.6 | -10.80  | 90 | 60 | 60 | 5.6 | -13.39  |
| 0 | 60 | 60 | 5.7 | -9.67   | 30 | 60 | 60 | 5.7 | -9.36   | 60 | 60 | 60 | 5.7 | -9.48   | 90 | 60 | 60 | 5.7 | -11.90  |
| 0 | 60 | 60 | 5.8 | -8.45   | 30 | 60 | 60 | 5.8 | -8.18   | 60 | 60 | 60 | 5.8 | -8.33   | 90 | 60 | 60 | 5.8 | -10.61  |
| 0 | 60 | 60 | 5.9 | -7.39   | 30 | 60 | 60 | 5.9 | -7.16   | 60 | 60 | 60 | 5.9 | -7.33   | 90 | 60 | 60 | 5.9 | -9.47   |
| 0 | 60 | 60 | 6   | -6.45   | 30 | 60 | 60 | 6   | -6.25   | 60 | 60 | 60 | 6   | -6.44   | 90 | 60 | 60 | 6   | -8.45   |
| 0 | 60 | 60 | 6.5 | -3.32   | 30 | 60 | 60 | 6.5 | -3.23   | 60 | 60 | 60 | 6.5 | -3.45   | 90 | 60 | 60 | 6.5 | -4.92   |
| 0 | 60 | 60 | 7   | -1.73   | 30 | 60 | 60 | 7   | -1.69   | 60 | 60 | 60 | 7   | -1.90   | 90 | 60 | 60 | 7   | -2.98   |
| 0 | 60 | 60 | 7.5 | -0.90   | 30 | 60 | 60 | 7.5 | -0.88   | 60 | 60 | 60 | 7.5 | -1.07   | 90 | 60 | 60 | 7.5 | -1.87   |
| 0 | 60 | 60 | 8   | -0.45   | 30 | 60 | 60 | 8   | -0.45   | 60 | 60 | 60 | 8   | -0.61   | 90 | 60 | 60 | 8   | -1.21   |
| 0 | 60 | 60 | 8.5 | -0.21   | 30 | 60 | 60 | 8.5 | -0.22   | 60 | 60 | 60 | 8.5 | -0.34   | 90 | 60 | 60 | 8.5 | -0.81   |
| 0 | 60 | 60 | 9   | -0.08   | 30 | 60 | 60 | 9   | -0.09   | 60 | 60 | 60 | 9   | -0.19   | 90 | 60 | 60 | 9   | -0.55   |
| 0 | 60 | 60 | 9.5 | -0.01   | 30 | 60 | 60 | 9.5 | -0.02   | 60 | 60 | 60 | 9.5 | -0.11   | 90 | 60 | 60 | 9.5 | -0.38   |
| 0 | 60 | 60 | 10  | 0.03    | 30 | 60 | 60 | 10  | 0.02    | 60 | 60 | 60 | 10  | -0.05   | 90 | 60 | 60 | 10  | -0.27   |
| 0 | 60 | 60 | 12  | 0.05    | 30 | 60 | 60 | 12  | 0.04    | 60 | 60 | 60 | 12  | 0.01    | 90 | 60 | 60 | 12  | -0.07   |
| 0 | 60 | 60 | 15  | 0.02    | 30 | 60 | 60 | 15  | 0.02    | 60 | 60 | 60 | 15  | 0.01    | 90 | 60 | 60 | 15  | -0.01   |
| 0 | 60 | 60 | 20  | 0.00    | 30 | 60 | 60 | 20  | 0.00    | 60 | 60 | 60 | 20  | 0.00    | 90 | 60 | 60 | 20  | 0.00    |
| 0 | 60 | 70 | 2.5 | 1436.65 | 30 | 60 | 70 | 2.5 | 1452.88 | 60 | 60 | 70 | 2.5 | 1491.73 | 90 | 60 | 70 | 2.5 | 1538.66 |
| 0 | 60 | 70 | 2.6 | 945.67  | 30 | 60 | 70 | 2.6 | 961.22  | 60 | 60 | 70 | 2.6 | 996.48  | 90 | 60 | 70 | 2.6 | 1032.83 |
| 0 | 60 | 70 | 2.7 | 595.72  | 30 | 60 | 70 | 2.7 | 610.15  | 60 | 60 | 70 | 2.7 | 641.51  | 90 | 60 | 70 | 2.7 | 669.12  |
| 0 | 60 | 70 | 2.8 | 350.53  | 30 | 60 | 70 | 2.8 | 363.65  | 60 | 60 | 70 | 2.8 | 391.13  | 90 | 60 | 70 | 2.8 | 411.56  |
| 0 | 60 | 70 | 2.9 | 181.28  | 30 | 60 | 70 | 2.9 | 193.06  | 60 | 60 | 70 | 2.9 | 216.87  | 90 | 60 | 70 | 2.9 | 231.44  |
| 0 | 60 | 70 | 3   | 67.28   | 30 | 60 | 70 | 3   | 77.74   | 60 | 60 | 70 | 3   | 98.18   | 90 | 60 | 70 | 3   | 108.14  |
| 0 | 60 | 70 | 3.1 | -7.33   | 30 | 60 | 70 | 3.1 | 1.90    | 60 | 60 | 70 | 3.1 | 19.35   | 90 | 60 | 70 | 3.1 | 25.78   |
| 0 | 60 | 70 | 3.2 | -54.25  | 30 | 60 | 70 | 3.2 | -46.12  | 60 | 60 | 70 | 3.2 | -31.24  | 90 | 60 | 70 | 3.2 | -27.41  |
| 0 | 60 | 70 | 3.3 | -81.82  | 30 | 60 | 70 | 3.3 | -74.69  | 60 | 60 | 70 | 3.3 | -61.96  | 90 | 60 | 70 | 3.3 | -60.00  |
| 0 | 60 | 70 | 3.4 | -96.21  | 30 | 60 | 70 | 3.4 | -89.95  | 60 | 60 | 70 | 3.4 | -79.03  | 90 | 60 | 70 | 3.4 | -78.43  |
| 0 | 60 | 70 | 3.5 | -101.69 | 30 | 60 | 70 | 3.5 | -96.18  | 60 | 60 | 70 | 3.5 | -86.79  | 90 | 60 | 70 | 3.5 | -87.17  |
| 0 | 60 | 70 | 3.6 | -101.32 | 30 | 60 | 70 | 3.6 | -96.47  | 60 | 60 | 70 | 3.6 | -88.37  | 90 | 60 | 70 | 3.6 | -89.46  |
| 0 | 60 | 70 | 3.7 | -97.28  | 30 | 60 | 70 | 3.7 | -93.00  | 60 | 60 | 70 | 3.7 | -86.01  | 90 | 60 | 70 | 3.7 | -87.61  |
| 0 | 60 | 70 | 3.8 | -91.11  | 30 | 60 | 70 | 3.8 | -87.33  | 60 | 60 | 70 | 3.8 | -81.29  | 90 | 60 | 70 | 3.8 | -83.22  |
| 0 | 60 | 70 | 3.9 | -83.84  | 30 | 60 | 70 | 3.9 | -80.49  | 60 | 60 | 70 | 3.9 | -75.27  | 90 | 60 | 70 | 3.9 | -77.42  |
| 0 | 60 | 70 | 4   | -76.18  | 30 | 60 | 70 | 4   | -73.21  | 60 | 60 | 70 | 4   | -68.68  | 90 | 60 | 70 | 4   | -70.94  |
| 0 | 60 | 70 | 4.1 | -68.57  | 30 | 60 | 70 | 4.1 | -65.94  | 60 | 60 | 70 | 4.1 | -62.01  | 90 | 60 | 70 | 4.1 | -64.32  |
| 0 | 60 | 70 | 4.2 | -61.29  | 30 | 60 | 70 | 4.2 | -58.95  | 60 | 60 | 70 | 4.2 | -55.52  | 90 | 60 | 70 | 4.2 | -57.84  |
| 0 | 60 | 70 | 4.3 | -54.51  | 30 | 60 | 70 | 4.3 | -52.43  | 60 | 60 | 70 | 4.3 | -49.44  | 90 | 60 | 70 | 4.3 | -51.72  |
| 0 | 60 | 70 | 4.4 | -48.29  | 30 | 60 | 70 | 4.4 | -46.44  | 60 | 60 | 70 | 4.4 | -43.84  | 90 | 60 | 70 | 4.4 | -46.07  |
| 0 | 60 | 70 | 4.5 | -42.67  | 30 | 60 | 70 | 4.5 | -41.02  | 60 | 60 | 70 | 4.5 | -38.74  | 90 | 60 | 70 | 4.5 | -40.91  |
| 0 | 60 | 70 | 4.6 | -37.65  | 30 | 60 | 70 | 4.6 | -36.17  | 60 | 60 | 70 | 4.6 | -34.18  | 90 | 60 | 70 | 4.6 | -36.26  |
| 0 | 60 | 70 | 4.7 | -33.16  | 30 | 60 | 70 | 4.7 | -31.85  | 60 | 60 | 70 | 4.7 | -30.10  | 90 | 60 | 70 | 4.7 | -32.10  |
| 0 | 60 | 70 | 4.8 | -29.20  | 30 | 60 | 70 | 4.8 | -28.02  | 60 | 60 | 70 | 4.8 | -26.49  | 90 | 60 | 70 | 4.8 | -28.40  |
| 0 | 60 | 70 | 4.9 | -25.72  | 30 | 60 | 70 | 4.9 | -24.66  | 60 | 60 | 70 | 4.9 | -23.31  | 90 | 60 | 70 | 4.9 | -25.14  |
| 0 | 60 | 70 | 5   | -22.65  | 30 | 60 | 70 | 5   | -21.70  | 60 | 60 | 70 | 5   | -20.51  | 90 | 60 | 70 | 5   | -22.25  |
| 0 | 60 | 70 | 5.1 | -19.97  | 30 | 60 | 70 | 5.1 | -19.11  | 60 | 60 | 70 | 5.1 | -18.07  | 90 | 60 | 70 | 5.1 | -19.71  |
| 0 | 60 | 70 | 5.2 | -17.60  | 30 | 60 | 70 | 5.2 | -16.83  | 60 | 60 | 70 | 5.2 | -15.91  | 90 | 60 | 70 | 5.2 | -17.47  |
| 0 | 60 | 70 | 5.3 | -15.54  | 30 | 60 | 70 | 5.3 | -14.84  | 60 | 60 | 70 | 5.3 | -14.03  | 90 | 60 | 70 | 5.3 | -15.51  |
| 0 | 60 | 70 | 5.4 | -13.73  | 30 | 60 | 70 | 5.4 | -13.11  | 60 | 60 | 70 | 5.4 | -12.39  | 90 | 60 | 70 | 5.4 | -13.79  |
| 0 | 60 | 70 | 5.5 | -12.15  | 30 | 60 | 70 | 5.5 | -11.58  | 60 | 60 | 70 | 5.5 | -10.95  | 90 | 60 | 70 | 5.5 | -12.27  |
| 0 | 60 | 70 | 5.6 | -10.77  | 30 | 60 | 70 | 5.6 | -10.25  | 60 | 60 | 70 | 5.6 | -9.70   | 90 | 60 | 70 | 5.6 | -10.95  |
| 0 | 60 | 70 | 5.7 | -9.54   | 30 | 60 | 70 | 5.7 | -9.08   | 60 | 60 | 70 | 5.7 | -8.59   | 90 | 60 | 70 | 5.7 | -9.76   |
| 0 | 60 | 70 | 5.8 | -8.48   | 30 | 60 | 70 | 5.8 | -8.05   | 60 | 60 | 70 | 5.8 | -7.62   | 90 | 60 | 70 | 5.8 | -8.73   |
| 0 | 60 | 70 | 5.9 | -7.55   | 30 | 60 | 70 | 5.9 | -7.16   | 60 | 60 | 70 | 5.9 | -6.78   | 90 | 60 | 70 | 5.9 | -7.83   |
| 0 | 60 | 70 | 6   | -6.72   | 30 | 60 | 70 | 6   | -6.37   | 60 | 60 | 70 | 6   | -6.03   | 90 | 60 | 70 | 6   | -7.02   |
| 0 | 60 | 70 | 6.5 | -3.85   | 30 | 60 | 70 | 6.5 | -3.62   | 60 | 60 | 70 | 6.5 | -3.44   | 90 | 60 | 70 | 6.5 | -4.19   |
| 0 | 60 | 70 | 7   | -2.27   | 30 | 60 | 70 | 7   | -2.13   | 60 | 60 | 70 | 7   | -2.03   | 90 | 60 | 70 | 7   | -2.60   |
| 0 | 60 | 70 | 7.5 | -1.38   | 30 | 60 | 70 | 7.5 | -1.28   | 60 | 60 | 70 | 7.5 | -1.23   | 90 | 60 | 70 | 7.5 | -1.66   |
| 0 | 60 | 70 | 8   | -0.86   | 30 | 60 | 70 | 8   | -0.79   | 60 | 60 | 70 | 8   | -0.77   | 90 | 60 | 70 | 8   | -1.10   |
| 0 | 60 | 70 | 8.5 | -0.54   | 30 | 60 | 70 | 8.5 | -0.49   | 60 | 60 | 70 | 8.5 | -0.48   | 90 | 60 | 70 | 8.5 | -0.74   |
| 0 | 60 | 70 | 9   | -0.34   | 30 | 60 | 70 | 9   | -0.31   | 60 | 60 | 70 | 9   | -0.31   | 90 | 60 | 70 | 9   | -0.51   |
| 0 | 60 | 70 | 9.5 | -0.22   | 30 | 60 | 70 | 9.5 | -0.20   | 60 | 60 | 70 | 9.5 | -0.20   | 90 | 60 | 70 | 9.5 | -0.36   |
| 0 | 60 | 70 | 10  | -0.14   | 30 | 60 | 70 | 10  | -0.12   | 60 | 60 | 70 | 10  | -0.13   | 90 | 60 | 70 | 10  | -0.25   |
| 0 | 60 | 70 | 12  | -0.02   | 30 | 60 | 70 | 12  | -0.02   | 60 | 60 | 70 | 12  | -0.02   | 90 | 60 | 70 | 12  | -0.07   |
| 0 | 60 | 70 | 15  | 0.00    | 30 | 60 | 70 | 15  | 0.00    | 60 | 60 | 70 | 15  | 0.00    | 90 | 60 | 70 | 15  | -0.01   |
| 0 | 60 | 70 | 20  | 0.00    | 30 | 60 | 70 | 20  | 0.00    | 60 | 60 | 70 | 20  | 0.00    | 90 | 60 | 70 | 20  | 0.00    |
| 0 | 60 | 80 | 2.5 | 921.26  | 30 | 60 | 80 | 2.5 | 942.47  | 60 | 60 | 80 | 2.5 | 986.48  | 90 | 60 | 80 | 2.5 | 916.45  |
| 0 | 60 | 80 | 2.6 | 532.92  | 30 | 60 | 80 | 2.6 | 551.43  | 60 | 60 | 80 | 2.6 | 589.14  | 90 | 60 | 80 | 2.6 | 612.52  |
| 0 | 60 | 80 | 2.7 | 139.55  | 30 | 60 | 80 | 2.7 | 155.65  | 60 | 60 | 80 | 2.7 | 187.79  | 90 | 60 | 80 | 2.7 | 205.75  |
| 0 | 60 | 80 | 2.8 | 13.75   | 30 | 60 | 80 | 2.8 | 27.76   | 60 | 60 | 80 | 2.8 | 55.18   | 90 | 60 | 80 | 2.8 | 68.87   |
| 0 | 60 | 80 | 2.9 | -65.17  | 30 | 60 | 80 | 2.9 | -52.95  | 60 | 60 | 80 | 2.9 | -29.44  | 90 | 60 | 80 | 2.9 | -19.02  |
| 0 | 60 | 80 | 3   | -111.57 | 30 | 60 | 80 | 3   | -100.87 | 60 | 60 | 80 | 3   | -80.60  | 90 | 60 | 80 | 3   | -72.62  |
| 0 | 60 | 80 | 3.1 | -135.84 | 30 | 60 | 80 | 3.1 | -126.45 |    |    |    |     |         |    |    |    |     |         |



|   |    |    |     |           |    |    |    |     |             |    |    |    |     |           |    |    |    |     |           |
|---|----|----|-----|-----------|----|----|----|-----|-------------|----|----|----|-----|-----------|----|----|----|-----|-----------|
| 0 | 60 | 80 | 4.8 | -28.57    | 30 | 60 | 80 | 4.8 | -27.18      | 60 | 60 | 80 | 4.8 | -24.77    | 90 | 60 | 80 | 4.8 | -24.82    |
| 0 | 60 | 80 | 4.9 | -25.32    | 30 | 60 | 80 | 4.9 | -24.05      | 60 | 60 | 80 | 4.9 | -21.86    | 90 | 60 | 80 | 4.9 | -21.93    |
| 0 | 60 | 80 | 5   | -22.47    | 30 | 60 | 80 | 5   | -21.30      | 60 | 60 | 80 | 5   | -19.31    | 90 | 60 | 80 | 5   | -19.39    |
| 0 | 60 | 80 | 5.1 | -19.98    | 30 | 60 | 80 | 5.1 | -18.91      | 60 | 60 | 80 | 5.1 | -17.09    | 90 | 60 | 80 | 5.1 | -17.19    |
| 0 | 60 | 80 | 5.2 | -17.79    | 30 | 60 | 80 | 5.2 | -16.81      | 60 | 60 | 80 | 5.2 | -15.14    | 90 | 60 | 80 | 5.2 | -15.25    |
| 0 | 60 | 80 | 5.3 | -15.87    | 30 | 60 | 80 | 5.3 | -14.97      | 60 | 60 | 80 | 5.3 | -13.44    | 90 | 60 | 80 | 5.3 | -13.56    |
| 0 | 60 | 80 | 5.4 | -14.19    | 30 | 60 | 80 | 5.4 | -13.36      | 60 | 60 | 80 | 5.4 | -11.96    | 90 | 60 | 80 | 5.4 | -12.09    |
| 0 | 60 | 80 | 5.5 | -12.70    | 30 | 60 | 80 | 5.5 | -11.94      | 60 | 60 | 80 | 5.5 | -10.65    | 90 | 60 | 80 | 5.5 | -10.78    |
| 0 | 60 | 80 | 5.6 | -11.40    | 30 | 60 | 80 | 5.6 | -10.69      | 60 | 60 | 80 | 5.6 | -9.51     | 90 | 60 | 80 | 5.6 | -9.65     |
| 0 | 60 | 80 | 5.7 | -10.23    | 30 | 60 | 80 | 5.7 | -9.59       | 60 | 60 | 80 | 5.7 | -8.50     | 90 | 60 | 80 | 5.7 | -8.63     |
| 0 | 60 | 80 | 5.8 | -9.21     | 30 | 60 | 80 | 5.8 | -8.61       | 60 | 60 | 80 | 5.8 | -7.61     | 90 | 60 | 80 | 5.8 | -7.75     |
| 0 | 60 | 80 | 5.9 | -8.31     | 30 | 60 | 80 | 5.9 | -7.76       | 60 | 60 | 80 | 5.9 | -6.84     | 90 | 60 | 80 | 5.9 | -6.97     |
| 0 | 60 | 80 | 6   | -7.50     | 30 | 60 | 80 | 6   | -6.99       | 60 | 60 | 80 | 6   | -6.14     | 90 | 60 | 80 | 6   | -6.27     |
| 0 | 60 | 80 | 6.5 | -4.62     | 30 | 60 | 80 | 6.5 | -4.26       | 60 | 60 | 80 | 6.5 | -3.69     | 90 | 60 | 80 | 6.5 | -3.81     |
| 0 | 60 | 80 | 7   | -2.94     | 30 | 60 | 80 | 7   | -2.70       | 60 | 60 | 80 | 7   | -2.29     | 90 | 60 | 80 | 7   | -2.39     |
| 0 | 60 | 80 | 7.5 | -1.93     | 30 | 60 | 80 | 7.5 | -1.76       | 60 | 60 | 80 | 7.5 | -1.47     | 90 | 60 | 80 | 7.5 | -1.55     |
| 0 | 60 | 80 | 8   | -1.30     | 30 | 60 | 80 | 8   | -1.17       | 60 | 60 | 80 | 8   | -0.97     | 90 | 60 | 80 | 8   | -1.04     |
| 0 | 60 | 80 | 8.5 | -0.90     | 30 | 60 | 80 | 8.5 | -0.80       | 60 | 60 | 80 | 8.5 | -0.65     | 90 | 60 | 80 | 8.5 | -0.70     |
| 0 | 60 | 80 | 9   | -0.63     | 30 | 60 | 80 | 9   | -0.56       | 60 | 60 | 80 | 9   | -0.44     | 90 | 60 | 80 | 9   | -0.49     |
| 0 | 60 | 80 | 9.5 | -0.45     | 30 | 60 | 80 | 9.5 | -0.40       | 60 | 60 | 80 | 9.5 | -0.31     | 90 | 60 | 80 | 9.5 | -0.35     |
| 0 | 60 | 80 | 10  | -0.30     | 30 | 60 | 80 | 10  | -0.29       | 60 | 60 | 80 | 10  | -0.22     | 90 | 60 | 80 | 10  | -0.25     |
| 0 | 60 | 80 | 12  | -0.10     | 30 | 60 | 80 | 12  | -0.08       | 60 | 60 | 80 | 12  | -0.06     | 90 | 60 | 80 | 12  | -0.07     |
| 0 | 60 | 80 | 15  | -0.02     | 30 | 60 | 80 | 15  | -0.02       | 60 | 60 | 80 | 15  | -0.01     | 90 | 60 | 80 | 15  | -0.01     |
| 0 | 60 | 80 | 20  | 0.00      | 30 | 60 | 80 | 20  | 0.00        | 60 | 60 | 80 | 20  | 0.00      | 90 | 60 | 80 | 20  | 0.00      |
| 0 | 60 | 90 | 2.5 | 901.56    | 30 | 60 | 90 | 2.5 | 922.79      | 60 | 60 | 90 | 2.5 | 964.67    | 90 | 60 | 90 | 2.5 | 985.49    |
| 0 | 60 | 90 | 2.6 | 365.15    | 30 | 60 | 90 | 2.6 | 384.13      | 60 | 60 | 90 | 2.6 | 421.54    | 90 | 60 | 90 | 2.6 | 440.08    |
| 0 | 60 | 90 | 2.7 | 11.95     | 30 | 60 | 90 | 2.7 | 28.83       | 60 | 60 | 90 | 2.7 | 62.08     | 90 | 60 | 90 | 2.7 | 78.46     |
| 0 | 60 | 90 | 2.8 | -82.92    | 30 | 60 | 90 | 2.8 | -67.93      | 60 | 60 | 90 | 2.8 | -38.44    | 90 | 60 | 90 | 2.8 | -23.99    |
| 0 | 60 | 90 | 2.9 | -137.95   | 30 | 60 | 90 | 2.9 | -124.67     | 60 | 60 | 90 | 2.9 | -98.54    | 90 | 60 | 90 | 2.9 | -85.78    |
| 0 | 60 | 90 | 3   | -166.03   | 30 | 60 | 90 | 3   | -154.29     | 60 | 60 | 90 | 3   | -131.14   | 90 | 60 | 90 | 3   | -119.83   |
| 0 | 60 | 90 | 3.1 | -176.39   | 30 | 60 | 90 | 3.1 | -166.01     | 60 | 60 | 90 | 3.1 | -145.51   | 90 | 60 | 90 | 3.1 | -135.47   |
| 0 | 60 | 90 | 3.2 | -175.49   | 30 | 60 | 90 | 3.2 | -166.32     | 60 | 60 | 90 | 3.2 | -148.17   | 90 | 60 | 90 | 3.2 | -139.24   |
| 0 | 60 | 90 | 3.3 | -167.80   | 30 | 60 | 90 | 3.3 | -159.69     | 60 | 60 | 90 | 3.3 | -143.62   | 90 | 60 | 90 | 3.3 | -135.67   |
| 0 | 60 | 90 | 3.4 | -156.33   | 30 | 60 | 90 | 3.4 | -149.16     | 60 | 60 | 90 | 3.4 | -134.91   | 90 | 60 | 90 | 3.4 | -127.83   |
| 0 | 60 | 90 | 3.5 | -143.12   | 30 | 60 | 90 | 3.5 | -136.76     | 60 | 60 | 90 | 3.5 | -124.08   | 90 | 60 | 90 | 3.5 | -117.77   |
| 0 | 60 | 90 | 3.6 | -129.45   | 30 | 60 | 90 | 3.6 | -123.77     | 60 | 60 | 90 | 3.6 | -112.46   | 90 | 60 | 90 | 3.6 | -106.81   |
| 0 | 60 | 90 | 3.7 | -116.09   | 30 | 60 | 90 | 3.7 | -110.99     | 60 | 60 | 90 | 3.7 | -100.85   | 90 | 60 | 90 | 3.7 | -95.79    |
| 0 | 60 | 90 | 3.8 | -103.52   | 30 | 60 | 90 | 3.8 | -98.93      | 60 | 60 | 90 | 3.8 | -89.79    | 90 | 60 | 90 | 3.8 | -85.24    |
| 0 | 60 | 90 | 3.9 | -91.92    | 30 | 60 | 90 | 3.9 | -87.78      | 60 | 60 | 90 | 3.9 | -79.53    | 90 | 60 | 90 | 3.9 | -75.41    |
| 0 | 60 | 90 | 4   | -81.42    | 30 | 60 | 90 | 4   | -77.66      | 60 | 60 | 90 | 4   | -70.19    | 90 | 60 | 90 | 4   | -66.46    |
| 0 | 60 | 90 | 4.1 | -72.01    | 30 | 60 | 90 | 4.1 | -68.60      | 60 | 60 | 90 | 4.1 | -61.81    | 90 | 60 | 90 | 4.1 | -58.43    |
| 0 | 60 | 90 | 4.2 | -63.64    | 30 | 60 | 90 | 4.2 | -60.54      | 60 | 60 | 90 | 4.2 | -54.36    | 90 | 60 | 90 | 4.2 | -51.28    |
| 0 | 60 | 90 | 4.3 | -56.26    | 30 | 60 | 90 | 4.3 | -53.43      | 60 | 60 | 90 | 4.3 | -47.80    | 90 | 60 | 90 | 4.3 | -45.00    |
| 0 | 60 | 90 | 4.4 | -49.77    | 30 | 60 | 90 | 4.4 | 40927919.47 | 60 | 60 | 90 | 4.4 | -42.05    | 90 | 60 | 90 | 4.4 | -39.49    |
| 0 | 60 | 90 | 4.5 | -44.07    | 30 | 60 | 90 | 4.5 | -41.71      | 60 | 60 | 90 | 4.5 | -37.02    | 90 | 60 | 90 | 4.5 | -34.68    |
| 0 | 60 | 90 | 4.6 | -39.09    | 30 | 60 | 90 | 4.6 | -36.94      | 60 | 60 | 90 | 4.6 | -32.64    | 90 | 60 | 90 | 4.6 | -30.49    |
| 0 | 60 | 90 | 4.7 | -34.71    | 30 | 60 | 90 | 4.7 | -32.74      | 60 | 60 | 90 | 4.7 | -28.80    | 90 | 60 | 90 | 4.7 | -26.84    |
| 0 | 60 | 90 | 4.8 | -30.89    | 30 | 60 | 90 | 4.8 | -29.08      | 60 | 60 | 90 | 4.8 | -25.46    | 90 | 60 | 90 | 4.8 | -23.66    |
| 0 | 60 | 90 | 4.9 | -27.55    | 30 | 60 | 90 | 4.9 | -25.88      | 60 | 60 | 90 | 4.9 | -22.56    | 90 | 60 | 90 | 4.9 | -20.90    |
| 0 | 60 | 90 | 5   | -24.61    | 30 | 60 | 90 | 5   | -23.08      | 60 | 60 | 90 | 5   | -20.01    | 90 | 60 | 90 | 5   | -18.49    |
| 0 | 60 | 90 | 5.1 | -22.04    | 30 | 60 | 90 | 5.1 | -20.63      | 60 | 60 | 90 | 5.1 | -17.80    | 90 | 60 | 90 | 5.1 | -16.40    |
| 0 | 60 | 90 | 5.2 | -19.76    | 30 | 60 | 90 | 5.2 | -18.46      | 60 | 60 | 90 | 5.2 | -15.85    | 90 | 60 | 90 | 5.2 | -14.56    |
| 0 | 60 | 90 | 5.3 | -17.76    | 30 | 60 | 90 | 5.3 | -16.56      | 60 | 60 | 90 | 5.3 | -14.15    | 90 | 60 | 90 | 5.3 | -12.95    |
| 0 | 60 | 90 | 5.4 | -16.01    | 30 | 60 | 90 | 5.4 | -14.89      | 60 | 60 | 90 | 5.4 | -12.67    | 90 | 60 | 90 | 5.4 | -11.56    |
| 0 | 60 | 90 | 5.5 | -14.44    | 30 | 60 | 90 | 5.5 | -13.41      | 60 | 60 | 90 | 5.5 | -11.35    | 90 | 60 | 90 | 5.5 | -10.32    |
| 0 | 60 | 90 | 5.6 | -13.07    | 30 | 60 | 90 | 5.6 | 40927919.47 | 60 | 60 | 90 | 5.6 | -10.20    | 90 | 60 | 90 | 5.6 | -9.24     |
| 0 | 60 | 90 | 5.7 | -11.83    | 30 | 60 | 90 | 5.7 | -10.94      | 60 | 60 | 90 | 5.7 | -9.17     | 90 | 60 | 90 | 5.7 | -8.29     |
| 0 | 60 | 90 | 5.8 | -10.73    | 30 | 60 | 90 | 5.8 | -9.91       | 60 | 60 | 90 | 5.8 | -8.26     | 90 | 60 | 90 | 5.8 | -7.44     |
| 0 | 60 | 90 | 5.9 | -9.76     | 30 | 60 | 90 | 5.9 | -9.00       | 60 | 60 | 90 | 5.9 | -7.47     | 90 | 60 | 90 | 5.9 | -6.70     |
| 0 | 60 | 90 | 6   | -8.89     | 30 | 60 | 90 | 6   | -8.17       | 60 | 60 | 90 | 6   | -6.75     | 90 | 60 | 90 | 6   | -6.04     |
| 0 | 60 | 90 | 6.5 | -5.70     | 30 | 60 | 90 | 6.5 | -5.19       | 60 | 60 | 90 | 6.5 | -4.19     | 90 | 60 | 90 | 6.5 | -3.69     |
| 0 | 60 | 90 | 7   | -3.78     | 30 | 60 | 90 | 7   | -3.42       | 60 | 60 | 90 | 7   | -2.69     | 90 | 60 | 90 | 7   | -2.33     |
| 0 | 60 | 90 | 7.5 | -2.58     | 30 | 60 | 90 | 7.5 | -2.32       | 60 | 60 | 90 | 7.5 | -1.78     | 90 | 60 | 90 | 7.5 | -1.52     |
| 0 | 60 | 90 | 8   | -1.81     | 30 | 60 | 90 | 8   | -1.61       | 60 | 60 | 90 | 8   | -1.21     | 90 | 60 | 90 | 8   | -1.02     |
| 0 | 60 | 90 | 8.5 | -1.29     | 30 | 60 | 90 | 8.5 | -1.14       | 60 | 60 | 90 | 8.5 | -0.84     | 90 | 60 | 90 | 8.5 | -0.70     |
| 0 | 60 | 90 | 9   | -0.94     | 30 | 60 | 90 | 9   | -0.83       | 60 | 60 | 90 | 9   | -0.60     | 90 | 60 | 90 | 9   | -0.49     |
| 0 | 60 | 90 | 9.5 | -0.70     | 30 | 60 | 90 | 9.5 | -0.61       | 60 | 60 | 90 | 9.5 | -0.43     | 90 | 60 | 90 | 9.5 | -0.34     |
| 0 | 60 | 90 | 10  | -0.52     | 30 | 60 | 90 | 10  | -0.45       | 60 | 60 | 90 | 10  | -0.32     | 90 | 60 | 90 | 10  | -0.25     |
| 0 | 60 | 90 | 12  | -0.18     | 30 | 60 | 90 | 12  | -0.16       | 60 | 60 | 90 | 12  | -0.10     | 90 | 60 | 90 | 12  | -0.07     |
| 0 | 60 | 90 | 15  | -0.04     | 30 | 60 | 90 | 15  | -0.04       | 60 | 60 | 90 | 15  | -0.02     | 90 | 60 | 90 | 15  | -0.02     |
| 0 | 60 | 90 | 20  | 0.00      | 30 | 60 | 90 | 20  | 0.00        | 60 | 60 | 90 | 20  | 0.00      | 90 | 60 | 90 | 20  | 0.00      |
| 0 | 75 | 0  | 2.5 | 103403.55 | 30 | 75 | 0  | 2.5 | 103403.55   | 60 | 75 | 0  | 2.5 | 103403.55 | 90 | 75 | 0  | 2.5 | 103403.55 |
| 0 | 75 | 0  | 2.6 | 72486.04  | 30 | 75 | 0  | 2.6 | 72486.04    | 60 | 75 | 0  | 2.6 | 72486.04  | 90 | 75 | 0  | 2.6 | 72486.04  |
| 0 | 75 | 0  | 2.7 | 57342.53  | 30 | 75 | 0  | 2.7 | 57342.53    | 60 | 75 | 0  | 2.7 | 57342.53  | 90 | 75 | 0  | 2.7 | 57342.53  |
| 0 | 75 | 0  | 2.8 | 52082.31  | 30 | 75 | 0  | 2.8 | 52082.31    | 60 | 75 | 0  | 2.8 | 52082.31  | 90 | 75 | 0  | 2.8 | 52082.31  |
| 0 | 75 | 0  | 2.9 | 52659.88  | 30 | 75 | 0  | 2.9 | 52659.88    | 60 | 75 | 0  | 2.9 | 52659.88  | 90 | 75 | 0  | 2.9 | 52659.88  |
| 0 | 75 | 0  | 3   | 56096.71  | 30 | 75 | 0  | 3   | 56096.71    | 60 | 75 | 0  | 3   | 56096.71  | 90 | 75 | 0  | 3   | 56096.71  |
| 0 | 75 | 0  | 3.1 | 55630.54  | 30 | 75 | 0  | 3.1 | 55630.54    | 60 | 75 | 0  | 3.1 | 55630.54  | 90 | 75 | 0  | 3.1 | 55630.54  |
| 0 |    |    |     |           |    |    |    |     |             |    |    |    |     |           |    |    |    |     |           |

|   |    |    |     |               |    |    |    |     |               |    |    |    |     |               |    |    |    |     |               |
|---|----|----|-----|---------------|----|----|----|-----|---------------|----|----|----|-----|---------------|----|----|----|-----|---------------|
| 0 | 75 | 0  | 4.9 | 141.49        | 30 | 75 | 0  | 4.9 | 141.49        | 60 | 75 | 0  | 4.9 | 141.49        | 90 | 75 | 0  | 4.9 | 141.49        |
| 0 | 75 | 0  | 5   | 83.50         | 30 | 75 | 0  | 5   | 83.50         | 60 | 75 | 0  | 5   | 83.50         | 90 | 75 | 0  | 5   | 83.50         |
| 0 | 75 | 0  | 5.1 | 44.34         | 30 | 75 | 0  | 5.1 | 44.34         | 60 | 75 | 0  | 5.1 | 44.34         | 90 | 75 | 0  | 5.1 | 44.34         |
| 0 | 75 | 0  | 5.2 | 18.47         | 30 | 75 | 0  | 5.2 | 18.47         | 60 | 75 | 0  | 5.2 | 18.47         | 90 | 75 | 0  | 5.2 | 18.47         |
| 0 | 75 | 0  | 5.3 | 1.85          | 30 | 75 | 0  | 5.3 | 1.85          | 60 | 75 | 0  | 5.3 | 1.85          | 90 | 75 | 0  | 5.3 | 1.85          |
| 0 | 75 | 0  | 5.4 | -8.37         | 30 | 75 | 0  | 5.4 | -8.37         | 60 | 75 | 0  | 5.4 | -8.37         | 90 | 75 | 0  | 5.4 | -8.37         |
| 0 | 75 | 0  | 5.5 | -14.24        | 30 | 75 | 0  | 5.5 | -14.24        | 60 | 75 | 0  | 5.5 | -14.24        | 90 | 75 | 0  | 5.5 | -14.24        |
| 0 | 75 | 0  | 5.6 | -17.17        | 30 | 75 | 0  | 5.6 | -17.17        | 60 | 75 | 0  | 5.6 | -17.17        | 90 | 75 | 0  | 5.6 | -17.17        |
| 0 | 75 | 0  | 5.7 | <b>-18.16</b> | 30 | 75 | 0  | 5.7 | <b>-18.16</b> | 60 | 75 | 0  | 5.7 | <b>-18.16</b> | 90 | 75 | 0  | 5.7 | <b>-18.16</b> |
| 0 | 75 | 0  | 5.8 | -17.94        | 30 | 75 | 0  | 5.8 | -17.94        | 60 | 75 | 0  | 5.8 | -17.94        | 90 | 75 | 0  | 5.8 | -17.94        |
| 0 | 75 | 0  | 5.9 | -17.00        | 30 | 75 | 0  | 5.9 | -17.00        | 60 | 75 | 0  | 5.9 | -17.00        | 90 | 75 | 0  | 5.9 | -17.00        |
| 0 | 75 | 0  | 6   | -15.66        | 30 | 75 | 0  | 6   | -15.66        | 60 | 75 | 0  | 6   | -15.66        | 90 | 75 | 0  | 6   | -15.66        |
| 0 | 75 | 0  | 6.5 | -8.45         | 30 | 75 | 0  | 6.5 | -8.45         | 60 | 75 | 0  | 6.5 | -8.45         | 90 | 75 | 0  | 6.5 | -8.45         |
| 0 | 75 | 0  | 7   | -3.92         | 30 | 75 | 0  | 7   | -3.92         | 60 | 75 | 0  | 7   | -3.92         | 90 | 75 | 0  | 7   | -3.92         |
| 0 | 75 | 0  | 7.5 | -1.68         | 30 | 75 | 0  | 7.5 | -1.68         | 60 | 75 | 0  | 7.5 | -1.68         | 90 | 75 | 0  | 7.5 | -1.68         |
| 0 | 75 | 0  | 8   | -0.64         | 30 | 75 | 0  | 8   | -0.64         | 60 | 75 | 0  | 8   | -0.64         | 90 | 75 | 0  | 8   | -0.64         |
| 0 | 75 | 0  | 8.5 | -0.18         | 30 | 75 | 0  | 8.5 | -0.18         | 60 | 75 | 0  | 8.5 | -0.18         | 90 | 75 | 0  | 8.5 | -0.18         |
| 0 | 75 | 0  | 9   | 0.03          | 30 | 75 | 0  | 9   | 0.03          | 60 | 75 | 0  | 9   | 0.03          | 90 | 75 | 0  | 9   | 0.03          |
| 0 | 75 | 0  | 9.5 | 0.12          | 30 | 75 | 0  | 9.5 | 0.12          | 60 | 75 | 0  | 9.5 | 0.12          | 90 | 75 | 0  | 9.5 | 0.12          |
| 0 | 75 | 0  | 10  | 0.15          | 30 | 75 | 0  | 10  | 0.15          | 60 | 75 | 0  | 10  | 0.15          | 90 | 75 | 0  | 10  | 0.15          |
| 0 | 75 | 0  | 12  | 0.11          | 30 | 75 | 0  | 12  | 0.11          | 60 | 75 | 0  | 12  | 0.11          | 90 | 75 | 0  | 12  | 0.11          |
| 0 | 75 | 0  | 15  | 0.04          | 30 | 75 | 0  | 15  | 0.04          | 60 | 75 | 0  | 15  | 0.04          | 90 | 75 | 0  | 15  | 0.04          |
| 0 | 75 | 0  | 20  | 0.00          | 30 | 75 | 0  | 20  | 0.00          | 60 | 75 | 0  | 20  | 0.00          | 90 | 75 | 0  | 20  | 0.00          |
| 0 | 75 | 10 | 2.5 | 68587.56      | 30 | 75 | 10 | 2.5 | 67184.59      | 60 | 75 | 10 | 2.5 | 66901.45      | 90 | 75 | 10 | 2.5 | 74683.47      |
| 0 | 75 | 10 | 2.6 | 52789.99      | 30 | 75 | 10 | 2.6 | 52848.77      | 60 | 75 | 10 | 2.6 | 54550.87      | 90 | 75 | 10 | 2.6 | 60000.17      |
| 0 | 75 | 10 | 2.7 | 46450.64      | 30 | 75 | 10 | 2.7 | 47254.58      | 60 | 75 | 10 | 2.7 | 50023.90      | 90 | 75 | 10 | 2.7 | 53915.84      |
| 0 | 75 | 10 | 2.8 | 45407.05      | 30 | 75 | 10 | 2.8 | 46664.48      | 60 | 75 | 10 | 2.8 | 50330.53      | 90 | 75 | 10 | 2.8 | 53330.94      |
| 0 | 75 | 10 | 2.9 | 46329.78      | 30 | 75 | 10 | 2.9 | 47833.95      | 60 | 75 | 10 | 2.9 | 52301.44      | 90 | 75 | 10 | 2.9 | 52055.25      |
| 0 | 75 | 10 | 3   | 45290.66      | 30 | 75 | 10 | 3   | 46358.56      | 60 | 75 | 10 | 3   | 48477.75      | 90 | 75 | 10 | 3   | 48295.20      |
| 0 | 75 | 10 | 3.1 | 39854.40      | 30 | 75 | 10 | 3.1 | 40281.04      | 60 | 75 | 10 | 3.1 | 40966.33      | 90 | 75 | 10 | 3.1 | 40692.29      |
| 0 | 75 | 10 | 3.2 | 32731.47      | 30 | 75 | 10 | 3.2 | 32902.96      | 60 | 75 | 10 | 3.2 | 33148.70      | 90 | 75 | 10 | 3.2 | 32964.99      |
| 0 | 75 | 10 | 3.3 | 25945.50      | 30 | 75 | 10 | 3.3 | 26024.19      | 60 | 75 | 10 | 3.3 | 26127.13      | 90 | 75 | 10 | 3.3 | 26014.13      |
| 0 | 75 | 10 | 3.4 | 20134.66      | 30 | 75 | 10 | 3.4 | 20175.39      | 60 | 75 | 10 | 3.4 | 20224.44      | 90 | 75 | 10 | 3.4 | 20153.17      |
| 0 | 75 | 10 | 3.5 | 15397.51      | 30 | 75 | 10 | 3.5 | 15420.54      | 60 | 75 | 10 | 3.5 | 15445.71      | 90 | 75 | 10 | 3.5 | 15397.32      |
| 0 | 75 | 10 | 3.6 | 11642.08      | 30 | 75 | 10 | 3.6 | 11655.78      | 60 | 75 | 10 | 3.6 | 11668.59      | 90 | 75 | 10 | 3.6 | 11632.40      |
| 0 | 75 | 10 | 3.7 | 8719.11       | 30 | 75 | 10 | 3.7 | 8727.41       | 60 | 75 | 10 | 3.7 | 8732.98       | 90 | 75 | 10 | 3.7 | 8703.38       |
| 0 | 75 | 10 | 3.8 | 6474.16       | 30 | 75 | 10 | 3.8 | 6479.13       | 60 | 75 | 10 | 3.8 | 6480.21       | 90 | 75 | 10 | 3.8 | 6454.50       |
| 0 | 75 | 10 | 3.9 | 4768.18       | 30 | 75 | 10 | 3.9 | 4771.01       | 60 | 75 | 10 | 3.9 | 4769.26       | 90 | 75 | 10 | 3.9 | 4746.20       |
| 0 | 75 | 10 | 4   | 3483.63       | 30 | 75 | 10 | 4   | 3485.03       | 60 | 75 | 10 | 4   | 3481.49       | 90 | 75 | 10 | 4   | 3460.46       |
| 0 | 75 | 10 | 4.1 | 2524.35       | 30 | 75 | 10 | 4.1 | 2524.80       | 60 | 75 | 10 | 4.1 | 2520.16       | 90 | 75 | 10 | 4.1 | 2500.85       |
| 0 | 75 | 10 | 4.2 | 1813.49       | 30 | 75 | 10 | 4.2 | 1813.30       | 60 | 75 | 10 | 4.2 | 1808.03       | 90 | 75 | 10 | 4.2 | 1790.29       |
| 0 | 75 | 10 | 4.3 | 1290.59       | 30 | 75 | 10 | 4.3 | 1289.98       | 60 | 75 | 10 | 4.3 | 1284.42       | 90 | 75 | 10 | 4.3 | 1268.18       |
| 0 | 75 | 10 | 4.4 | 908.74        | 30 | 75 | 10 | 4.4 | 907.83        | 60 | 75 | 10 | 4.4 | 902.22        | 90 | 75 | 10 | 4.4 | 887.46        |
| 0 | 75 | 10 | 4.5 | 631.83        | 30 | 75 | 10 | 4.5 | 630.76        | 60 | 75 | 10 | 4.5 | 625.32        | 90 | 75 | 10 | 4.5 | 612.01        |
| 0 | 75 | 10 | 4.6 | 432.55        | 30 | 75 | 10 | 4.6 | 431.43        | 60 | 75 | 10 | 4.6 | 426.26        | 90 | 75 | 10 | 4.6 | 414.37        |
| 0 | 75 | 10 | 4.7 | 290.38        | 30 | 75 | 10 | 4.7 | 289.25        | 60 | 75 | 10 | 4.7 | 284.45        | 90 | 75 | 10 | 4.7 | 273.88        |
| 0 | 75 | 10 | 4.8 | 190.01        | 30 | 75 | 10 | 4.8 | 188.91        | 60 | 75 | 10 | 4.8 | 184.49        | 90 | 75 | 10 | 4.8 | 175.10        |
| 0 | 75 | 10 | 4.9 | 119.99        | 30 | 75 | 10 | 4.9 | 118.96        | 60 | 75 | 10 | 4.9 | 114.91        | 90 | 75 | 10 | 4.9 | 106.58        |
| 0 | 75 | 10 | 5   | 71.84         | 30 | 75 | 10 | 5   | 70.87         | 60 | 75 | 10 | 5   | 67.19         | 90 | 75 | 10 | 5   | 59.79         |
| 0 | 75 | 10 | 5.1 | 39.24         | 30 | 75 | 10 | 5.1 | 38.34         | 60 | 75 | 10 | 5.1 | 35.01         | 90 | 75 | 10 | 5.1 | 28.45         |
| 0 | 75 | 10 | 5.2 | 17.60         | 30 | 75 | 10 | 5.2 | 16.77         | 60 | 75 | 10 | 5.2 | 13.77         | 90 | 75 | 10 | 5.2 | 7.96          |
| 0 | 75 | 10 | 5.3 | 3.61          | 30 | 75 | 10 | 5.3 | 2.85          | 60 | 75 | 10 | 5.3 | 0.16          | 90 | 75 | 10 | 5.3 | -4.97         |
| 0 | 75 | 10 | 5.4 | -5.06         | 30 | 75 | 10 | 5.4 | -5.75         | 60 | 75 | 10 | 5.4 | -8.16         | 90 | 75 | 10 | 5.4 | -12.70        |
| 0 | 75 | 10 | 5.5 | -10.07        | 30 | 75 | 10 | 5.5 | -10.70        | 60 | 75 | 10 | 5.5 | -12.87        | 90 | 75 | 10 | 5.5 | -16.89        |
| 0 | 75 | 10 | 5.6 | -12.63        | 30 | 75 | 10 | 5.6 | -13.20        | 60 | 75 | 10 | 5.6 | -15.14        | 90 | 75 | 10 | 5.6 | -18.72        |
| 0 | 75 | 10 | 5.7 | <b>-13.56</b> | 30 | 75 | 10 | 5.7 | <b>-14.08</b> | 60 | 75 | 10 | 5.7 | <b>-15.83</b> | 90 | 75 | 10 | 5.7 | <b>-19.01</b> |
| 0 | 75 | 10 | 5.8 | -13.47        | 30 | 75 | 10 | 5.8 | -13.94        | 60 | 75 | 10 | 5.8 | -15.51        | 90 | 75 | 10 | 5.8 | -18.34        |
| 0 | 75 | 10 | 5.9 | -12.76        | 30 | 75 | 10 | 5.9 | -13.18        | 60 | 75 | 10 | 5.9 | -14.60        | 90 | 75 | 10 | 5.9 | -17.13        |
| 0 | 75 | 10 | 6   | -11.71        | 30 | 75 | 10 | 6   | -12.10        | 60 | 75 | 10 | 6   | -13.37        | 90 | 75 | 10 | 6   | -15.63        |
| 0 | 75 | 10 | 6.5 | -5.95         | 30 | 75 | 10 | 6.5 | -6.18         | 60 | 75 | 10 | 6.5 | -6.95         | 90 | 75 | 10 | 6.5 | -8.28         |
| 0 | 75 | 10 | 7   | -2.40         | 30 | 75 | 10 | 7   | -2.55         | 60 | 75 | 10 | 7   | -3.04         | 90 | 75 | 10 | 7   | -3.86         |
| 0 | 75 | 10 | 7.5 | -0.73         | 30 | 75 | 10 | 7.5 | -0.83         | 60 | 75 | 10 | 7.5 | -1.15         | 90 | 75 | 10 | 7.5 | -1.69         |
| 0 | 75 | 10 | 8   | -0.02         | 30 | 75 | 10 | 8   | -0.10         | 60 | 75 | 10 | 8   | -0.32         | 90 | 75 | 10 | 8   | -0.68         |
| 0 | 75 | 10 | 8.5 | 0.24          | 30 | 75 | 10 | 8.5 | 0.19          | 60 | 75 | 10 | 8.5 | 0.04          | 90 | 75 | 10 | 8.5 | -0.22         |
| 0 | 75 | 10 | 9   | 0.33          | 30 | 75 | 10 | 9   | 0.29          | 60 | 75 | 10 | 9   | 0.18          | 90 | 75 | 10 | 9   | 0.00          |
| 0 | 75 | 10 | 9.5 | 0.33          | 30 | 75 | 10 | 9.5 | 0.30          | 60 | 75 | 10 | 9.5 | 0.22          | 90 | 75 | 10 | 9.5 | 0.09          |
| 0 | 75 | 10 | 10  | 0.31          | 30 | 75 | 10 | 10  | 0.29          | 60 | 75 | 10 | 10  | 0.22          | 90 | 75 | 10 | 10  | 0.13          |
| 0 | 75 | 10 | 12  | 0.16          | 30 | 75 | 10 | 12  | 0.16          | 60 | 75 | 10 | 12  | 0.13          | 90 | 75 | 10 | 12  | 0.10          |
| 0 | 75 | 10 | 15  | 0.05          | 30 | 75 | 10 | 15  | 0.05          | 60 | 75 | 10 | 15  | 0.05          | 90 | 75 | 10 | 15  | 0.04          |
| 0 | 75 | 10 | 20  | 0.00          | 30 | 75 | 10 | 20  | 0.00          | 60 | 75 | 10 | 20  | 0.00          | 90 | 75 | 10 | 20  | 0.00          |
| 0 | 75 | 20 | 2.5 | 44537.14      | 30 | 75 | 20 | 2.5 | 43442.31      | 60 | 75 | 20 | 2.5 | 43868.25      | 90 | 75 | 20 | 2.5 | 49148.95      |
| 0 | 75 | 20 | 2.6 | 37230.05      | 30 | 75 | 20 | 2.6 | 37562.84      | 60 | 75 | 20 | 2.6 | 39961.04      | 90 | 75 | 20 | 2.6 | 43816.57      |
| 0 | 75 | 20 | 2.7 | 33180.33      | 30 | 75 | 20 | 2.7 | 34069.78      | 60 | 75 | 20 | 2.7 | 36865.81      | 90 | 75 | 20 | 2.7 | 39256.32      |
| 0 | 75 | 20 | 2.8 | 30306.36      | 30 | 75 | 20 | 2.8 | 31238.29      | 60 | 75 | 20 | 2.8 | 33599.25      | 90 | 75 | 20 | 2.8 | 34839.33      |
| 0 | 75 | 20 | 2.9 | 27419.22      | 30 | 75 | 20 | 2.9 | 28149.21      | 60 | 75 | 20 | 2.9 | 29737.41      | 90 | 75 | 20 | 2.9 | 30363.12      |
| 0 | 75 | 20 | 3   | 24030.16      | 30 | 75 | 20 | 3   | 24520.71      | 60 | 75 | 20 | 3   | 25506.43      | 90 | 75 | 20 | 3   | 25799.15      |
| 0 | 75 | 20 | 3.1 | 20353.51      | 30 | 75 | 20 | 3.1 | 20661.86      | 60 | 75 | 20 | 3.1 | 21254.79      | 90 | 75 | 20 | 3.1 | 21395.61      |
| 0 | 75 |    |     |               |    |    |    |     |               |    |    |    |     |               |    |    |    |     |               |

|   |    |    |     |               |    |    |    |     |               |    |    |    |     |               |    |    |    |     |               |
|---|----|----|-----|---------------|----|----|----|-----|---------------|----|----|----|-----|---------------|----|----|----|-----|---------------|
| 0 | 75 | 20 | 5   | 21.46         | 30 | 75 | 20 | 5   | 22.05         | 60 | 75 | 20 | 5   | 20.72         | 90 | 75 | 20 | 5   | 11.98         |
| 0 | 75 | 20 | 5.1 | 5.19          | 30 | 75 | 20 | 5.1 | 5.61          | 60 | 75 | 20 | 5.1 | 4.22          | 90 | 75 | 20 | 5.1 | -3.63         |
| 0 | 75 | 20 | 5.2 | -4.99         | 30 | 75 | 20 | 5.2 | -4.71         | 60 | 75 | 20 | 5.2 | -6.12         | 90 | 75 | 20 | 5.2 | -13.16        |
| 0 | 75 | 20 | 5.3 | -10.96        | 30 | 75 | 20 | 5.3 | -10.79        | 60 | 75 | 20 | 5.3 | -12.20        | 90 | 75 | 20 | 5.3 | -18.52        |
| 0 | 75 | 20 | 5.4 | -14.08        | 30 | 75 | 20 | 5.4 | -14.00        | 60 | 75 | 20 | 5.4 | -15.39        | 90 | 75 | 20 | 5.4 | -21.07        |
| 0 | 75 | 20 | 5.5 | -15.33        | 30 | 75 | 20 | 5.5 | -15.32        | 60 | 75 | 20 | 5.5 | -16.67        | 90 | 75 | 20 | 5.5 | <b>-21.77</b> |
| 0 | 75 | 20 | 5.6 | <b>-15.38</b> | 30 | 75 | 20 | 5.6 | <b>-15.42</b> | 60 | 75 | 20 | 5.6 | <b>-16.72</b> | 90 | 75 | 20 | 5.6 | -21.31        |
| 0 | 75 | 20 | 5.7 | -14.70        | 30 | 75 | 20 | 5.7 | -14.77        | 60 | 75 | 20 | 5.7 | -16.00        | 90 | 75 | 20 | 5.7 | -20.15        |
| 0 | 75 | 20 | 5.8 | -13.59        | 30 | 75 | 20 | 5.8 | -13.69        | 60 | 75 | 20 | 5.8 | -14.86        | 90 | 75 | 20 | 5.8 | -18.60        |
| 0 | 75 | 20 | 5.9 | -12.28        | 30 | 75 | 20 | 5.9 | -12.39        | 60 | 75 | 20 | 5.9 | -13.49        | 90 | 75 | 20 | 5.9 | -16.87        |
| 0 | 75 | 20 | 6   | -10.90        | 30 | 75 | 20 | 6   | -11.02        | 60 | 75 | 20 | 6   | -12.05        | 90 | 75 | 20 | 6   | -15.11        |
| 0 | 75 | 20 | 6.5 | -5.07         | 30 | 75 | 20 | 6.5 | -5.20         | 60 | 75 | 20 | 6.5 | -5.92         | 90 | 75 | 20 | 6.5 | -7.81         |
| 0 | 75 | 20 | 7   | -1.91         | 30 | 75 | 20 | 7   | -2.02         | 60 | 75 | 20 | 7   | -2.52         | 90 | 75 | 20 | 7   | -3.74         |
| 0 | 75 | 20 | 7.5 | -0.49         | 30 | 75 | 20 | 7.5 | -0.57         | 60 | 75 | 20 | 7.5 | -0.93         | 90 | 75 | 20 | 7.5 | -1.74         |
| 0 | 75 | 20 | 8   | 0.10          | 30 | 75 | 20 | 8   | 0.03          | 60 | 75 | 20 | 8   | -0.23         | 90 | 75 | 20 | 8   | -0.79         |
| 0 | 75 | 20 | 8.5 | 0.31          | 30 | 75 | 20 | 8.5 | 0.26          | 60 | 75 | 20 | 8.5 | 0.07          | 90 | 75 | 20 | 8.5 | -0.33         |
| 0 | 75 | 20 | 9   | 0.37          | 30 | 75 | 20 | 9   | 0.33          | 60 | 75 | 20 | 9   | 0.19          | 90 | 75 | 20 | 9   | -0.10         |
| 0 | 75 | 20 | 9.5 | 0.36          | 30 | 75 | 20 | 9.5 | 0.33          | 60 | 75 | 20 | 9.5 | 0.22          | 90 | 75 | 20 | 9.5 | 0.01          |
| 0 | 75 | 20 | 10  | 0.32          | 30 | 75 | 20 | 10  | 0.30          | 60 | 75 | 20 | 10  | 0.22          | 90 | 75 | 20 | 10  | 0.06          |
| 0 | 75 | 20 | 12  | 0.17          | 30 | 75 | 20 | 12  | 0.16          | 60 | 75 | 20 | 12  | 0.13          | 90 | 75 | 20 | 12  | 0.07          |
| 0 | 75 | 20 | 15  | 0.06          | 30 | 75 | 20 | 15  | 0.05          | 60 | 75 | 20 | 15  | 0.05          | 90 | 75 | 20 | 15  | 0.03          |
| 0 | 75 | 20 | 20  | 0.00          | 30 | 75 | 20 | 20  | 0.00          | 60 | 75 | 20 | 20  | 0.00          | 90 | 75 | 20 | 20  | 0.00          |
| 0 | 75 | 30 | 2.5 | 25592.18      | 30 | 75 | 30 | 2.5 | 25581.43      | 60 | 75 | 30 | 2.5 | 26081.69      | 90 | 75 | 30 | 2.5 | 26906.24      |
| 0 | 75 | 30 | 2.6 | 21569.61      | 30 | 75 | 30 | 2.6 | 21820.77      | 60 | 75 | 30 | 2.6 | 22605.67      | 90 | 75 | 30 | 2.6 | 23320.01      |
| 0 | 75 | 30 | 2.7 | 18366.89      | 30 | 75 | 30 | 2.7 | 18681.99      | 60 | 75 | 30 | 2.7 | 19423.89      | 90 | 75 | 30 | 2.7 | 19964.16      |
| 0 | 75 | 30 | 2.8 | 15562.72      | 30 | 75 | 30 | 2.8 | 15851.40      | 60 | 75 | 30 | 2.8 | 16475.18      | 90 | 75 | 30 | 2.8 | 16866.24      |
| 0 | 75 | 30 | 2.9 | 13043.38      | 30 | 75 | 30 | 2.9 | 13277.71      | 60 | 75 | 30 | 2.9 | 13763.14      | 90 | 75 | 30 | 2.9 | 14041.32      |
| 0 | 75 | 30 | 3   | 10770.13      | 30 | 75 | 30 | 3   | 10950.54      | 60 | 75 | 30 | 3   | 11316.00      | 90 | 75 | 30 | 3   | 11513.32      |
| 0 | 75 | 30 | 3.1 | 8749.92       | 30 | 75 | 30 | 3.1 | 8886.48       | 60 | 75 | 30 | 3.1 | 9159.31       | 90 | 75 | 30 | 3.1 | 9299.58       |
| 0 | 75 | 30 | 3.2 | 6995.28       | 30 | 75 | 30 | 3.2 | 7098.86       | 60 | 75 | 30 | 3.2 | 7303.60       | 90 | 75 | 30 | 3.2 | 7403.17       |
| 0 | 75 | 30 | 3.3 | 5507.39       | 30 | 75 | 30 | 3.3 | 5586.87       | 60 | 75 | 30 | 3.3 | 5742.16       | 90 | 75 | 30 | 3.3 | 5812.16       |
| 0 | 75 | 30 | 3.4 | 4273.56       | 30 | 75 | 30 | 3.4 | 4335.42       | 60 | 75 | 30 | 3.4 | 4454.56       | 90 | 75 | 30 | 3.4 | 4502.70       |
| 0 | 75 | 30 | 3.5 | 3270.53       | 30 | 75 | 30 | 3.5 | 3319.30       | 60 | 75 | 30 | 3.5 | 3411.60       | 90 | 75 | 30 | 3.5 | 3443.38       |
| 0 | 75 | 30 | 3.6 | 2469.26       | 30 | 75 | 30 | 3.6 | 2508.11       | 60 | 75 | 30 | 3.6 | 2580.12       | 90 | 75 | 30 | 3.6 | 2599.69       |
| 0 | 75 | 30 | 3.7 | 1838.96       | 30 | 75 | 30 | 3.7 | 1870.15       | 60 | 75 | 30 | 3.7 | 1926.63       | 90 | 75 | 30 | 3.7 | 1937.19       |
| 0 | 75 | 30 | 3.8 | 1350.06       | 30 | 75 | 30 | 3.8 | 1375.26       | 60 | 75 | 30 | 3.8 | 1419.72       | 90 | 75 | 30 | 3.8 | 1423.81       |
| 0 | 75 | 30 | 3.9 | 975.89        | 30 | 75 | 30 | 3.9 | 996.33        | 60 | 75 | 30 | 3.9 | 1031.41       | 90 | 75 | 30 | 3.9 | 1030.99       |
| 0 | 75 | 30 | 4   | 693.30        | 30 | 75 | 30 | 4   | 709.91        | 60 | 75 | 30 | 4   | 737.63        | 90 | 75 | 30 | 4   | 734.09        |
| 0 | 75 | 30 | 4.1 | 482.73        | 30 | 75 | 30 | 4.1 | 496.25        | 60 | 75 | 30 | 4.1 | 518.10        | 90 | 75 | 30 | 4.1 | 512.43        |
| 0 | 75 | 30 | 4.2 | 327.94        | 30 | 75 | 30 | 4.2 | 338.94        | 60 | 75 | 30 | 4.2 | 356.08        | 90 | 75 | 30 | 4.2 | 348.97        |
| 0 | 75 | 30 | 4.3 | 215.61        | 30 | 75 | 30 | 4.3 | 224.57        | 60 | 75 | 30 | 4.3 | 237.95        | 90 | 75 | 30 | 4.3 | 229.94        |
| 0 | 75 | 30 | 4.4 | 135.11        | 30 | 75 | 30 | 4.4 | 142.43        | 60 | 75 | 30 | 4.4 | 152.85        | 90 | 75 | 30 | 4.4 | 144.42        |
| 0 | 75 | 30 | 4.5 | 78.18         | 30 | 75 | 30 | 4.5 | 84.21         | 60 | 75 | 30 | 4.5 | 92.36         | 90 | 75 | 30 | 4.5 | 83.93         |
| 0 | 75 | 30 | 4.6 | 38.62         | 30 | 75 | 30 | 4.6 | 43.62         | 60 | 75 | 30 | 4.6 | 50.06         | 90 | 75 | 30 | 4.6 | 41.93         |
| 0 | 75 | 30 | 4.7 | 11.85         | 30 | 75 | 30 | 4.7 | 16.03         | 60 | 75 | 30 | 4.7 | 21.15         | 90 | 75 | 30 | 4.7 | 13.50         |
| 0 | 75 | 30 | 4.8 | -5.56         | 30 | 75 | 30 | 4.8 | -2.08         | 60 | 75 | 30 | 4.8 | 2.02          | 90 | 75 | 30 | 4.8 | -5.10         |
| 0 | 75 | 30 | 4.9 | -16.23        | 30 | 75 | 30 | 4.9 | -13.33        | 60 | 75 | 30 | 4.9 | -10.08        | 90 | 75 | 30 | 4.9 | -16.67        |
| 0 | 75 | 30 | 5   | -22.16        | 30 | 75 | 30 | 5   | -19.74        | 60 | 75 | 30 | 5   | -17.20        | 90 | 75 | 30 | 5   | -23.30        |
| 0 | 75 | 30 | 5.1 | -24.84        | 30 | 75 | 30 | 5.1 | -22.84        | 60 | 75 | 30 | 5.1 | -20.89        | 90 | 75 | 30 | 5.1 | -26.55        |
| 0 | 75 | 30 | 5.2 | <b>-25.41</b> | 30 | 75 | 30 | 5.2 | <b>-23.76</b> | 60 | 75 | 30 | 5.2 | <b>-22.30</b> | 90 | 75 | 30 | 5.2 | <b>-27.53</b> |
| 0 | 75 | 30 | 5.3 | -24.65        | 30 | 75 | 30 | 5.3 | -23.29        | 60 | 75 | 30 | 5.3 | -22.24        | 90 | 75 | 30 | 5.3 | -27.07        |
| 0 | 75 | 30 | 5.4 | -23.11        | 30 | 75 | 30 | 5.4 | -22.00        | 60 | 75 | 30 | 5.4 | -21.26        | 90 | 75 | 30 | 5.4 | -25.72        |
| 0 | 75 | 30 | 5.5 | -21.17        | 30 | 75 | 30 | 5.5 | -20.26        | 60 | 75 | 30 | 5.5 | -19.77        | 90 | 75 | 30 | 5.5 | -23.87        |
| 0 | 75 | 30 | 5.6 | -19.07        | 30 | 75 | 30 | 5.6 | -18.32        | 60 | 75 | 30 | 5.6 | -18.03        | 90 | 75 | 30 | 5.6 | -21.80        |
| 0 | 75 | 30 | 5.7 | -16.97        | 30 | 75 | 30 | 5.7 | -16.35        | 60 | 75 | 30 | 5.7 | -16.20        | 90 | 75 | 30 | 5.7 | -19.66        |
| 0 | 75 | 30 | 5.8 | -14.95        | 30 | 75 | 30 | 5.8 | -14.44        | 60 | 75 | 30 | 5.8 | -14.40        | 90 | 75 | 30 | 5.8 | -17.58        |
| 0 | 75 | 30 | 5.9 | -13.07        | 30 | 75 | 30 | 5.9 | -12.65        | 60 | 75 | 30 | 5.9 | -12.70        | 90 | 75 | 30 | 5.9 | -15.61        |
| 0 | 75 | 30 | 6   | -11.36        | 30 | 75 | 30 | 6   | -11.01        | 60 | 75 | 30 | 6   | -11.12        | 90 | 75 | 30 | 6   | -13.79        |
| 0 | 75 | 30 | 6.5 | -5.25         | 30 | 75 | 30 | 6.5 | -5.11         | 60 | 75 | 30 | 6.5 | -5.34         | 90 | 75 | 30 | 6.5 | -7.10         |
| 0 | 75 | 30 | 7   | -2.20         | 30 | 75 | 30 | 7   | -2.15         | 60 | 75 | 30 | 7   | -2.39         | 90 | 75 | 30 | 7   | -3.58         |
| 0 | 75 | 30 | 7.5 | -0.80         | 30 | 75 | 30 | 7.5 | -0.79         | 60 | 75 | 30 | 7.5 | -1.00         | 90 | 75 | 30 | 7.5 | -1.82         |
| 0 | 75 | 30 | 8   | -0.18         | 30 | 75 | 30 | 8   | -0.18         | 60 | 75 | 30 | 8   | -0.35         | 90 | 75 | 30 | 8   | -0.94         |
| 0 | 75 | 30 | 8.5 | 0.09          | 30 | 75 | 30 | 8.5 | 0.08          | 60 | 75 | 30 | 8.5 | -0.05         | 90 | 75 | 30 | 8.5 | -0.48         |
| 0 | 75 | 30 | 9   | 0.20          | 30 | 75 | 30 | 9   | 0.19          | 60 | 75 | 30 | 9   | 0.08          | 90 | 75 | 30 | 9   | -0.23         |
| 0 | 75 | 30 | 9.5 | 0.23          | 30 | 75 | 30 | 9.5 | 0.22          | 60 | 75 | 30 | 9.5 | 0.13          | 90 | 75 | 30 | 9.5 | -0.10         |
| 0 | 75 | 30 | 10  | 0.23          | 30 | 75 | 30 | 10  | 0.22          | 60 | 75 | 30 | 10  | 0.15          | 90 | 75 | 30 | 10  | -0.03         |
| 0 | 75 | 30 | 12  | 0.14          | 30 | 75 | 30 | 12  | 0.13          | 60 | 75 | 30 | 12  | 0.10          | 90 | 75 | 30 | 12  | 0.04          |
| 0 | 75 | 30 | 15  | 0.05          | 30 | 75 | 30 | 15  | 0.05          | 60 | 75 | 30 | 15  | 0.04          | 90 | 75 | 30 | 15  | 0.02          |
| 0 | 75 | 30 | 20  | 0.00          | 30 | 75 | 30 | 20  | 0.00          | 60 | 75 | 30 | 20  | 0.00          | 90 | 75 | 30 | 20  | 0.00          |
| 0 | 75 | 40 | 2.5 | 14094.55      | 30 | 75 | 40 | 2.5 | 14081.87      | 60 | 75 | 40 | 2.5 | 14120.06      | 90 | 75 | 40 | 2.5 | 14336.10      |
| 0 | 75 | 40 | 2.6 | 11229.22      | 30 | 75 | 40 | 2.6 | 11269.91      | 60 | 75 | 40 | 2.6 | 11387.53      | 90 | 75 | 40 | 2.6 | 11591.42      |
| 0 | 75 | 40 | 2.7 | 8923.97       | 30 | 75 | 40 | 2.7 | 8986.49       | 60 | 75 | 40 | 2.7 | 9133.05       | 90 | 75 | 40 | 2.7 | 9312.41       |
| 0 | 75 | 40 | 2.8 | 7056.98       | 30 | 75 | 40 | 2.8 | 7124.95       | 60 | 75 | 40 | 2.8 | 7274.39       | 90 | 75 | 40 | 2.8 | 7425.54       |
| 0 | 75 | 40 | 2.9 | 5541.35       | 30 | 75 | 40 | 2.9 | 5607.00       | 60 | 75 | 40 | 2.9 | 5747.07       | 90 | 75 | 40 | 2.9 | 5870.77       |
| 0 | 75 | 40 | 3   | 4312.92       | 30 | 75 | 40 | 3   | 4373.13       | 60 | 75 | 40 | 3   | 4499.02       | 90 | 75 | 40 | 3   | 4598.01       |
| 0 | 75 | 40 | 3.1 | 3322.17       | 30 | 75 | 40 | 3.1 | 3376.02       | 60 | 75 | 40 | 3.1 | 3486.63       | 90 | 75 | 40 | 3.1 | 3564.39       |
| 0 | 75 | 40 | 3.2 | 2529.04       | 30 | 75 | 40 | 3.2 | 2576.67       | 60 | 75 | 40 | 3.2 | 2672.60       | 90 | 75 | 40 | 3.2 | 2732.63</     |

|   |    |    |     |         |    |    |    |     |         |    |    |    |     |         |    |    |    |     |         |
|---|----|----|-----|---------|----|----|----|-----|---------|----|----|----|-----|---------|----|----|----|-----|---------|
| 0 | 75 | 40 | 5.1 | -35.52  | 30 | 75 | 40 | 5.1 | -33.02  | 60 | 75 | 40 | 5.1 | -29.56  | 90 | 75 | 40 | 5.1 | -32.80  |
| 0 | 75 | 40 | 5.2 | -32.14  | 30 | 75 | 40 | 5.2 | -29.99  | 60 | 75 | 40 | 5.2 | -27.10  | 90 | 75 | 40 | 5.2 | -30.19  |
| 0 | 75 | 40 | 5.3 | -28.76  | 30 | 75 | 40 | 5.3 | -26.92  | 60 | 75 | 40 | 5.3 | -24.52  | 90 | 75 | 40 | 5.3 | -27.45  |
| 0 | 75 | 40 | 5.4 | -25.53  | 30 | 75 | 40 | 5.4 | -23.95  | 60 | 75 | 40 | 5.4 | -21.95  | 90 | 75 | 40 | 5.4 | -24.72  |
| 0 | 75 | 40 | 5.5 | -22.53  | 30 | 75 | 40 | 5.5 | -21.17  | 60 | 75 | 40 | 5.5 | -19.51  | 90 | 75 | 40 | 5.5 | -22.11  |
| 0 | 75 | 40 | 5.6 | -19.79  | 30 | 75 | 40 | 5.6 | -18.62  | 60 | 75 | 40 | 5.6 | -17.24  | 90 | 75 | 40 | 5.6 | -19.67  |
| 0 | 75 | 40 | 5.7 | -17.33  | 30 | 75 | 40 | 5.7 | -16.32  | 60 | 75 | 40 | 5.7 | -15.16  | 90 | 75 | 40 | 5.7 | -17.44  |
| 0 | 75 | 40 | 5.8 | -15.14  | 30 | 75 | 40 | 5.8 | -14.26  | 60 | 75 | 40 | 5.8 | -13.29  | 90 | 75 | 40 | 5.8 | -15.42  |
| 0 | 75 | 40 | 5.9 | -13.20  | 30 | 75 | 40 | 5.9 | -12.43  | 60 | 75 | 40 | 5.9 | -11.63  | 90 | 75 | 40 | 5.9 | -13.61  |
| 0 | 75 | 40 | 6   | -11.49  | 30 | 75 | 40 | 6   | -10.82  | 60 | 75 | 40 | 6   | -10.15  | 90 | 75 | 40 | 6   | -11.99  |
| 0 | 75 | 40 | 6.5 | -5.67   | 30 | 75 | 40 | 6.5 | -5.32   | 60 | 75 | 40 | 6.5 | -5.06   | 90 | 75 | 40 | 6.5 | -6.36   |
| 0 | 75 | 40 | 7   | -2.77   | 30 | 75 | 40 | 7   | -2.58   | 60 | 75 | 40 | 7   | -2.50   | 90 | 75 | 40 | 7   | -3.43   |
| 0 | 75 | 40 | 7.5 | -1.34   | 30 | 75 | 40 | 7.5 | -1.24   | 60 | 75 | 40 | 7.5 | -1.24   | 90 | 75 | 40 | 7.5 | -1.91   |
| 0 | 75 | 40 | 8   | -0.63   | 30 | 75 | 40 | 8   | -0.57   | 60 | 75 | 40 | 8   | -0.60   | 90 | 75 | 40 | 8   | -1.09   |
| 0 | 75 | 40 | 8.5 | -0.27   | 30 | 75 | 40 | 8.5 | -0.23   | 60 | 75 | 40 | 8.5 | -0.27   | 90 | 75 | 40 | 8.5 | -0.64   |
| 0 | 75 | 40 | 9   | -0.08   | 30 | 75 | 40 | 9   | -0.06   | 60 | 75 | 40 | 9   | -0.11   | 90 | 75 | 40 | 9   | -0.38   |
| 0 | 75 | 40 | 9.5 | 0.02    | 30 | 75 | 40 | 9.5 | 0.02    | 60 | 75 | 40 | 9.5 | -0.01   | 90 | 75 | 40 | 9.5 | -0.22   |
| 0 | 75 | 40 | 10  | 0.06    | 30 | 75 | 40 | 10  | 0.06    | 60 | 75 | 40 | 10  | 0.03    | 90 | 75 | 40 | 10  | -0.13   |
| 0 | 75 | 40 | 12  | 0.07    | 30 | 75 | 40 | 12  | 0.07    | 60 | 75 | 40 | 12  | 0.05    | 90 | 75 | 40 | 12  | -0.01   |
| 0 | 75 | 40 | 15  | 0.03    | 30 | 75 | 40 | 15  | 0.03    | 60 | 75 | 40 | 15  | 0.02    | 90 | 75 | 40 | 15  | 0.01    |
| 0 | 75 | 40 | 20  | 0.00    | 30 | 75 | 40 | 20  | 0.00    | 60 | 75 | 40 | 20  | 0.00    | 90 | 75 | 40 | 20  | 0.00    |
| 0 | 75 | 50 | 2.5 | 7035.32 | 30 | 75 | 50 | 2.5 | 6998.07 | 60 | 75 | 50 | 2.5 | 6944.15 | 90 | 75 | 50 | 2.5 | 7015.90 |
| 0 | 75 | 50 | 2.6 | 5303.58 | 30 | 75 | 50 | 2.6 | 5294.02 | 60 | 75 | 50 | 2.6 | 5289.04 | 90 | 75 | 50 | 2.6 | 5361.99 |
| 0 | 75 | 50 | 2.7 | 3970.28 | 30 | 75 | 50 | 2.7 | 3977.48 | 60 | 75 | 50 | 2.7 | 4001.59 | 90 | 75 | 50 | 2.7 | 4069.90 |
| 0 | 75 | 50 | 2.8 | 2946.70 | 30 | 75 | 50 | 2.8 | 2963.52 | 60 | 75 | 50 | 2.8 | 3003.72 | 90 | 75 | 50 | 2.8 | 3064.53 |
| 0 | 75 | 50 | 2.9 | 2163.70 | 30 | 75 | 50 | 2.9 | 2185.47 | 60 | 75 | 50 | 2.9 | 2233.43 | 90 | 75 | 50 | 2.9 | 2285.74 |
| 0 | 75 | 50 | 3   | 1567.37 | 30 | 75 | 50 | 3   | 1591.28 | 60 | 75 | 50 | 3   | 1641.78 | 90 | 75 | 50 | 3   | 1685.62 |
| 0 | 75 | 50 | 3.1 | 1115.92 | 30 | 75 | 50 | 3.1 | 1140.24 | 60 | 75 | 50 | 3.1 | 1190.08 | 90 | 75 | 50 | 3.1 | 1226.05 |
| 0 | 75 | 50 | 3.2 | 776.80  | 30 | 75 | 50 | 3.2 | 800.49  | 60 | 75 | 50 | 3.2 | 847.77  | 90 | 75 | 50 | 3.2 | 876.71  |
| 0 | 75 | 50 | 3.3 | 524.60  | 30 | 75 | 50 | 3.3 | 546.99  | 60 | 75 | 50 | 3.3 | 590.63  | 90 | 75 | 50 | 3.3 | 613.46  |
| 0 | 75 | 50 | 3.4 | 339.29  | 30 | 75 | 50 | 3.4 | 359.95  | 60 | 75 | 50 | 3.4 | 399.38  | 90 | 75 | 50 | 3.4 | 417.02  |
| 0 | 75 | 50 | 3.5 | 205.00  | 30 | 75 | 50 | 3.5 | 223.66  | 60 | 75 | 50 | 3.5 | 258.69  | 90 | 75 | 50 | 3.5 | 272.02  |
| 0 | 75 | 50 | 3.6 | 109.19  | 30 | 75 | 50 | 3.6 | 125.79  | 60 | 75 | 50 | 3.6 | 156.53  | 90 | 75 | 50 | 3.6 | 166.33  |
| 0 | 75 | 50 | 3.7 | 42.09   | 30 | 75 | 50 | 3.7 | 56.75   | 60 | 75 | 50 | 3.7 | 83.53   | 90 | 75 | 50 | 3.7 | 90.51   |
| 0 | 75 | 50 | 3.8 | -3.66   | 30 | 75 | 50 | 3.8 | 9.23    | 60 | 75 | 50 | 3.8 | 32.46   | 90 | 75 | 50 | 3.8 | 37.23   |
| 0 | 75 | 50 | 3.9 | -33.64  | 30 | 75 | 50 | 3.9 | -22.34  | 60 | 75 | 50 | 3.9 | -2.24   | 90 | 75 | 50 | 3.9 | 0.79    |
| 0 | 75 | 50 | 4   | -52.11  | 30 | 75 | 50 | 4   | -42.23  | 60 | 75 | 50 | 4   | -24.89  | 90 | 75 | 50 | 4   | -23.20  |
| 0 | 75 | 50 | 4.1 | -62.35  | 30 | 75 | 50 | 4.1 | -53.74  | 60 | 75 | 50 | 4.1 | -38.81  | 90 | 75 | 50 | 4.1 | -38.13  |
| 0 | 75 | 50 | 4.2 | -66.87  | 30 | 75 | 50 | 4.2 | -59.37  | 60 | 75 | 50 | 4.2 | -46.52  | 90 | 75 | 50 | 4.2 | -46.58  |
| 0 | 75 | 50 | 4.3 | -67.51  | 30 | 75 | 50 | 4.3 | -60.98  | 60 | 75 | 50 | 4.3 | -49.90  | 90 | 75 | 50 | 4.3 | -50.50  |
| 0 | 75 | 50 | 4.4 | -65.63  | 30 | 75 | 50 | 4.4 | -59.93  | 60 | 75 | 50 | 4.4 | -50.35  | 90 | 75 | 50 | 4.4 | -51.32  |
| 0 | 75 | 50 | 4.5 | -62.16  | 30 | 75 | 50 | 4.5 | -57.17  | 60 | 75 | 50 | 4.5 | -48.88  | 90 | 75 | 50 | 4.5 | -50.11  |
| 0 | 75 | 50 | 4.6 | -57.78  | 30 | 75 | 50 | 4.6 | -53.41  | 60 | 75 | 50 | 4.6 | -46.22  | 90 | 75 | 50 | 4.6 | -47.62  |
| 0 | 75 | 50 | 4.7 | -52.97  | 30 | 75 | 50 | 4.7 | -49.13  | 60 | 75 | 50 | 4.7 | -42.89  | 90 | 75 | 50 | 4.7 | -44.39  |
| 0 | 75 | 50 | 4.8 | -48.04  | 30 | 75 | 50 | 4.8 | -44.66  | 60 | 75 | 50 | 4.8 | -39.25  | 90 | 75 | 50 | 4.8 | -40.82  |
| 0 | 75 | 50 | 4.9 | -43.21  | 30 | 75 | 50 | 4.9 | -40.24  | 60 | 75 | 50 | 4.9 | -35.54  | 90 | 75 | 50 | 4.9 | -37.14  |
| 0 | 75 | 50 | 5   | -38.62  | 30 | 75 | 50 | 5   | -36.01  | 60 | 75 | 50 | 5   | -31.93  | 90 | 75 | 50 | 5   | -33.52  |
| 0 | 75 | 50 | 5.1 | -34.35  | 30 | 75 | 50 | 5.1 | -32.06  | 60 | 75 | 50 | 5.1 | -28.51  | 90 | 75 | 50 | 5.1 | -30.09  |
| 0 | 75 | 50 | 5.2 | -30.45  | 30 | 75 | 50 | 5.2 | -28.42  | 60 | 75 | 50 | 5.2 | -25.34  | 90 | 75 | 50 | 5.2 | -26.88  |
| 0 | 75 | 50 | 5.3 | -26.91  | 30 | 75 | 50 | 5.3 | -25.13  | 60 | 75 | 50 | 5.3 | -22.44  | 90 | 75 | 50 | 5.3 | -23.94  |
| 0 | 75 | 50 | 5.4 | -23.74  | 30 | 75 | 50 | 5.4 | -22.16  | 60 | 75 | 50 | 5.4 | -19.82  | 90 | 75 | 50 | 5.4 | -21.26  |
| 0 | 75 | 50 | 5.5 | -20.92  | 30 | 75 | 50 | 5.5 | -19.52  | 60 | 75 | 50 | 5.5 | -17.48  | 90 | 75 | 50 | 5.5 | -18.86  |
| 0 | 75 | 50 | 5.6 | -18.42  | 30 | 75 | 50 | 5.6 | -17.18  | 60 | 75 | 50 | 5.6 | -15.39  | 90 | 75 | 50 | 5.6 | -16.72  |
| 0 | 75 | 50 | 5.7 | -16.22  | 30 | 75 | 50 | 5.7 | -15.12  | 60 | 75 | 50 | 5.7 | -13.55  | 90 | 75 | 50 | 5.7 | -14.81  |
| 0 | 75 | 50 | 5.8 | -14.28  | 30 | 75 | 50 | 5.8 | -13.30  | 60 | 75 | 50 | 5.8 | -11.92  | 90 | 75 | 50 | 5.8 | -13.12  |
| 0 | 75 | 50 | 5.9 | -12.58  | 30 | 75 | 50 | 5.9 | -11.70  | 60 | 75 | 50 | 5.9 | -10.49  | 90 | 75 | 50 | 5.9 | -11.63  |
| 0 | 75 | 50 | 6   | -11.08  | 30 | 75 | 50 | 6   | -10.30  | 60 | 75 | 50 | 6   | -9.23   | 90 | 75 | 50 | 6   | -10.31  |
| 0 | 75 | 50 | 6.5 | -5.96   | 30 | 75 | 50 | 6.5 | -5.50   | 60 | 75 | 50 | 6.5 | -4.93   | 90 | 75 | 50 | 6.5 | -5.75   |
| 0 | 75 | 50 | 7   | -3.30   | 30 | 75 | 50 | 7   | -3.02   | 60 | 75 | 50 | 7   | -2.71   | 90 | 75 | 50 | 7   | -3.32   |
| 0 | 75 | 50 | 7.5 | -1.88   | 30 | 75 | 50 | 7.5 | -1.70   | 60 | 75 | 50 | 7.5 | -1.53   | 90 | 75 | 50 | 7.5 | -1.99   |
| 0 | 75 | 50 | 8   | -1.09   | 30 | 75 | 50 | 8   | -0.98   | 60 | 75 | 50 | 8   | -0.88   | 90 | 75 | 50 | 8   | -1.23   |
| 0 | 75 | 50 | 8.5 | -0.65   | 30 | 75 | 50 | 8.5 | -0.57   | 60 | 75 | 50 | 8.5 | -0.51   | 90 | 75 | 50 | 8.5 | -0.78   |
| 0 | 75 | 50 | 9   | -0.38   | 30 | 75 | 50 | 9   | -0.33   | 60 | 75 | 50 | 9   | -0.30   | 90 | 75 | 50 | 9   | -0.51   |
| 0 | 75 | 50 | 9.5 | -0.23   | 30 | 75 | 50 | 9.5 | -0.19   | 60 | 75 | 50 | 9.5 | -0.18   | 90 | 75 | 50 | 9.5 | -0.34   |
| 0 | 75 | 50 | 10  | -0.13   | 30 | 75 | 50 | 10  | -0.11   | 60 | 75 | 50 | 10  | -0.10   | 90 | 75 | 50 | 10  | -0.23   |
| 0 | 75 | 50 | 12  | 0.00    | 30 | 75 | 50 | 12  | 0.00    | 60 | 75 | 50 | 12  | -0.04   | 90 | 75 | 50 | 12  | -0.05   |
| 0 | 75 | 50 | 15  | 0.01    | 30 | 75 | 50 | 15  | 0.01    | 60 | 75 | 50 | 15  | 0.01    | 90 | 75 | 50 | 15  | 0.00    |
| 0 | 75 | 50 | 20  | 0.00    | 30 | 75 | 50 | 20  | 0.00    | 60 | 75 | 50 | 20  | 0.00    | 90 | 75 | 50 | 20  | 0.00    |
| 0 | 75 | 60 | 2.5 | 3215.65 | 30 | 75 | 60 | 2.5 | 3204.32 | 60 | 75 | 60 | 2.5 | 3191.46 | 90 | 75 | 60 | 2.5 | 3227.37 |
| 0 | 75 | 60 | 2.6 | 2292.67 | 30 | 75 | 60 | 2.6 | 2292.82 | 60 | 75 | 60 | 2.6 | 2299.81 | 90 | 75 | 60 | 2.6 | 2334.08 |
| 0 | 75 | 60 | 2.7 | 1606.63 | 30 | 75 | 60 | 2.7 | 1613.92 | 60 | 75 | 60 | 2.7 | 1632.81 | 90 | 75 | 60 | 2.7 | 1664.03 |
| 0 | 75 | 60 | 2.8 | 1100.70 | 30 | 75 | 60 | 2.8 | 1112.20 | 60 | 75 | 60 | 2.8 | 1137.77 | 90 | 75 | 60 | 2.8 | 1165.33 |
| 0 | 75 | 60 | 2.9 | 730.89  | 30 | 75 | 60 | 2.9 | 744.65  | 60 | 75 | 60 | 2.9 | 773.47  | 90 | 75 | 60 | 2.9 | 797.28  |
| 0 | 75 | 60 | 3   | 463.44  | 30 | 75 | 60 | 3   | 478.16  | 60 | 75 | 60 | 3   | 508.05  | 90 | 75 | 60 | 3   | 528.25  |
| 0 | 75 | 60 | 3.1 | 272.60  | 30 | 75 | 60 | 3.1 | 287.45  | 60 | 75 | 60 | 3.1 | 316.96  | 90 | 75 | 60 | 3.1 | 333.81  |
| 0 | 75 | 60 | 3.2 | 138.82  | 30 | 75 | 60 | 3.2 | 153.23  | 60 | 75 | 60 | 3.2 | 181.37  | 90 | 75 | 60 | 3.2 | 195.15  |
| 0 | 75 | 60 | 3.3 | 47.16   | 30 | 75 | 60 | 3.3 | 60.75   | 60 | 75 | 60 | 3.3 | 86.86   | 90 | 75 | 60 | 3.3 | 97.90   |
| 0 | 75 | 60 | 3.4 | -13.87  | 30 | 75 | 60 | 3.4 | -1.32   | 60 | 75 | 60 | 3.4 | 22.42   | 90 |    |    |     |         |

|   |    |    |     |         |    |    |    |     |         |    |    |    |     |         |    |    |    |     |         |
|---|----|----|-----|---------|----|----|----|-----|---------|----|----|----|-----|---------|----|----|----|-----|---------|
| 0 | 75 | 60 | 5.2 | -26.80  | 30 | 75 | 60 | 5.2 | -25.07  | 60 | 75 | 60 | 5.2 | -22.22  | 90 | 75 | 60 | 5.2 | -22.76  |
| 0 | 75 | 60 | 5.3 | -23.78  | 30 | 75 | 60 | 5.3 | -22.22  | 60 | 75 | 60 | 5.3 | -19.67  | 90 | 75 | 60 | 5.3 | -20.22  |
| 0 | 75 | 60 | 5.4 | -21.12  | 30 | 75 | 60 | 5.4 | -19.71  | 60 | 75 | 60 | 5.4 | -17.42  | 90 | 75 | 60 | 5.4 | -17.97  |
| 0 | 75 | 60 | 5.5 | -18.76  | 30 | 75 | 60 | 5.5 | -17.49  | 60 | 75 | 60 | 5.5 | -15.44  | 90 | 75 | 60 | 5.5 | -15.99  |
| 0 | 75 | 60 | 5.6 | -16.68  | 30 | 75 | 60 | 5.6 | -15.53  | 60 | 75 | 60 | 5.6 | -13.69  | 90 | 75 | 60 | 5.6 | -14.23  |
| 0 | 75 | 60 | 5.7 | -14.85  | 30 | 75 | 60 | 5.7 | -13.81  | 60 | 75 | 60 | 5.7 | -12.15  | 90 | 75 | 60 | 5.7 | -12.68  |
| 0 | 75 | 60 | 5.8 | -13.23  | 30 | 75 | 60 | 5.8 | -12.29  | 60 | 75 | 60 | 5.8 | -10.80  | 90 | 75 | 60 | 5.8 | -11.32  |
| 0 | 75 | 60 | 5.9 | -11.81  | 30 | 75 | 60 | 5.9 | -10.96  | 60 | 75 | 60 | 5.9 | -9.61   | 90 | 75 | 60 | 5.9 | -10.11  |
| 0 | 75 | 60 | 6   | -10.56  | 30 | 75 | 60 | 6   | -9.78   | 60 | 75 | 60 | 6   | -8.56   | 90 | 75 | 60 | 6   | -9.05   |
| 0 | 75 | 60 | 6.5 | -6.15   | 30 | 75 | 60 | 6.5 | -5.66   | 60 | 75 | 60 | 6.5 | -4.91   | 90 | 75 | 60 | 6.5 | -5.31   |
| 0 | 75 | 60 | 7   | -3.72   | 30 | 75 | 60 | 7   | -3.40   | 60 | 75 | 60 | 7   | -2.93   | 90 | 75 | 60 | 7   | -3.25   |
| 0 | 75 | 60 | 7.5 | -2.33   | 30 | 75 | 60 | 7.5 | -2.11   | 60 | 75 | 60 | 7.5 | -1.80   | 90 | 75 | 60 | 7.5 | -2.05   |
| 0 | 75 | 60 | 8   | -1.50   | 30 | 75 | 60 | 8   | -1.35   | 60 | 75 | 60 | 8   | -1.14   | 90 | 75 | 60 | 8   | -1.34   |
| 0 | 75 | 60 | 8.5 | -0.99   | 30 | 75 | 60 | 8.5 | -0.88   | 60 | 75 | 60 | 8.5 | -0.74   | 90 | 75 | 60 | 8.5 | -0.90   |
| 0 | 75 | 60 | 9   | -0.67   | 30 | 75 | 60 | 9   | -0.59   | 60 | 75 | 60 | 9   | -0.49   | 90 | 75 | 60 | 9   | -0.61   |
| 0 | 75 | 60 | 9.5 | -0.46   | 30 | 75 | 60 | 9.5 | -0.40   | 60 | 75 | 60 | 9.5 | -0.33   | 90 | 75 | 60 | 9.5 | -0.43   |
| 0 | 75 | 60 | 10  | -0.32   | 30 | 75 | 60 | 10  | -0.28   | 60 | 75 | 60 | 10  | -0.23   | 90 | 75 | 60 | 10  | -0.30   |
| 0 | 75 | 60 | 12  | -0.08   | 30 | 75 | 60 | 12  | -0.07   | 60 | 75 | 60 | 12  | -0.05   | 90 | 75 | 60 | 12  | -0.09   |
| 0 | 75 | 60 | 15  | -0.01   | 30 | 75 | 60 | 15  | -0.01   | 60 | 75 | 60 | 15  | -0.01   | 90 | 75 | 60 | 15  | -0.02   |
| 0 | 75 | 60 | 20  | 0.00    | 30 | 75 | 60 | 20  | 0.00    | 60 | 75 | 60 | 20  | 0.00    | 90 | 75 | 60 | 20  | 0.00    |
| 0 | 75 | 70 | 2.5 | 1343.09 | 30 | 75 | 70 | 2.5 | 1354.76 | 60 | 75 | 70 | 2.5 | 1381.04 | 90 | 75 | 70 | 2.5 | 1408.97 |
| 0 | 75 | 70 | 2.6 | 866.66  | 30 | 75 | 70 | 2.6 | 880.13  | 60 | 75 | 70 | 2.6 | 908.73  | 90 | 75 | 70 | 2.6 | 933.00  |
| 0 | 75 | 70 | 2.7 | 528.31  | 30 | 75 | 70 | 2.7 | 542.43  | 60 | 75 | 70 | 2.7 | 571.34  | 90 | 75 | 70 | 2.7 | 592.11  |
| 0 | 75 | 70 | 2.8 | 291.69  | 30 | 75 | 70 | 2.8 | 305.80  | 60 | 75 | 70 | 2.8 | 333.95  | 90 | 75 | 70 | 2.8 | 351.49  |
| 0 | 75 | 70 | 2.9 | 129.43  | 30 | 75 | 70 | 2.9 | 143.13  | 60 | 75 | 70 | 2.9 | 169.97  | 90 | 75 | 70 | 2.9 | 184.64  |
| 0 | 75 | 70 | 3   | 20.99   | 30 | 75 | 70 | 3   | 34.04   | 60 | 75 | 70 | 3   | 59.23   | 90 | 75 | 70 | 3   | 71.41   |
| 0 | 75 | 70 | 3.1 | -48.91  | 30 | 75 | 70 | 3.1 | -36.71  | 60 | 75 | 70 | 3.1 | -13.42  | 90 | 75 | 70 | 3.1 | -3.33   |
| 0 | 75 | 70 | 3.2 | -91.63  | 30 | 75 | 70 | 3.2 | -80.41  | 60 | 75 | 70 | 3.2 | -59.17  | 90 | 75 | 70 | 3.2 | -50.81  |
| 0 | 75 | 70 | 3.3 | -115.50 | 30 | 75 | 70 | 3.3 | -105.31 | 60 | 75 | 70 | 3.3 | -86.13  | 90 | 75 | 70 | 3.3 | -79.20  |
| 0 | 75 | 70 | 3.4 | -126.58 | 30 | 75 | 70 | 3.4 | -117.39 | 60 | 75 | 70 | 3.4 | -100.16 | 90 | 75 | 70 | 3.4 | -94.40  |
| 0 | 75 | 70 | 3.5 | -129.15 | 30 | 75 | 70 | 3.5 | -120.89 | 60 | 75 | 70 | 3.5 | -105.43 | 90 | 75 | 70 | 3.5 | -100.64 |
| 0 | 75 | 70 | 3.6 | -126.25 | 30 | 75 | 70 | 3.6 | -118.82 | 60 | 75 | 70 | 3.6 | -104.95 | 90 | 75 | 70 | 3.6 | -100.96 |
| 0 | 75 | 70 | 3.7 | -120.00 | 30 | 75 | 70 | 3.7 | -113.29 | 60 | 75 | 70 | 3.7 | -100.84 | 90 | 75 | 70 | 3.7 | -97.52  |
| 0 | 75 | 70 | 3.8 | -111.84 | 30 | 75 | 70 | 3.8 | -105.79 | 60 | 75 | 70 | 3.8 | -94.61  | 90 | 75 | 70 | 3.8 | -91.84  |
| 0 | 75 | 70 | 3.9 | -102.80 | 30 | 75 | 70 | 3.9 | -97.34  | 60 | 75 | 70 | 3.9 | -87.29  | 90 | 75 | 70 | 3.9 | -84.99  |
| 0 | 75 | 70 | 4   | -93.53  | 30 | 75 | 70 | 4   | -88.60  | 60 | 75 | 70 | 4   | -79.57  | 90 | 75 | 70 | 4   | -77.66  |
| 0 | 75 | 70 | 4.1 | -84.47  | 30 | 75 | 70 | 4.1 | -80.02  | 60 | 75 | 70 | 4.1 | -71.91  | 90 | 75 | 70 | 4.1 | -70.31  |
| 0 | 75 | 70 | 4.2 | -75.89  | 30 | 75 | 70 | 4.2 | -71.87  | 60 | 75 | 70 | 4.2 | -64.57  | 90 | 75 | 70 | 4.2 | -63.24  |
| 0 | 75 | 70 | 4.3 | -67.91  | 30 | 75 | 70 | 4.3 | -64.28  | 60 | 75 | 70 | 4.3 | -57.72  | 90 | 75 | 70 | 4.3 | -56.61  |
| 0 | 75 | 70 | 4.4 | -60.61  | 30 | 75 | 70 | 4.4 | -57.34  | 60 | 75 | 70 | 4.4 | -51.43  | 90 | 75 | 70 | 4.4 | -50.50  |
| 0 | 75 | 70 | 4.5 | -54.01  | 30 | 75 | 70 | 4.5 | -51.05  | 60 | 75 | 70 | 4.5 | -45.72  | 90 | 75 | 70 | 4.5 | -44.95  |
| 0 | 75 | 70 | 4.6 | -48.08  | 30 | 75 | 70 | 4.6 | -45.40  | 60 | 75 | 70 | 4.6 | -40.59  | 90 | 75 | 70 | 4.6 | -39.96  |
| 0 | 75 | 70 | 4.7 | -42.79  | 30 | 75 | 70 | 4.7 | -40.35  | 60 | 75 | 70 | 4.7 | -36.01  | 90 | 75 | 70 | 4.7 | -35.49  |
| 0 | 75 | 70 | 4.8 | -38.08  | 30 | 75 | 70 | 4.8 | -35.88  | 60 | 75 | 70 | 4.8 | -31.94  | 90 | 75 | 70 | 4.8 | -31.52  |
| 0 | 75 | 70 | 4.9 | -33.91  | 30 | 75 | 70 | 4.9 | -31.91  | 60 | 75 | 70 | 4.9 | -28.34  | 90 | 75 | 70 | 4.9 | -28.00  |
| 0 | 75 | 70 | 5   | -30.22  | 30 | 75 | 70 | 5   | -28.40  | 60 | 75 | 70 | 5   | -25.16  | 90 | 75 | 70 | 5   | -24.88  |
| 0 | 75 | 70 | 5.1 | -26.96  | 30 | 75 | 70 | 5.1 | -25.30  | 60 | 75 | 70 | 5.1 | -22.36  | 90 | 75 | 70 | 5.1 | -22.14  |
| 0 | 75 | 70 | 5.2 | -24.08  | 30 | 75 | 70 | 5.2 | -22.56  | 60 | 75 | 70 | 5.2 | -19.89  | 90 | 75 | 70 | 5.2 | -19.72  |
| 0 | 75 | 70 | 5.3 | -21.53  | 30 | 75 | 70 | 5.3 | -20.15  | 60 | 75 | 70 | 5.3 | -17.72  | 90 | 75 | 70 | 5.3 | -17.58  |
| 0 | 75 | 70 | 5.4 | -19.29  | 30 | 75 | 70 | 5.4 | -18.02  | 60 | 75 | 70 | 5.4 | -15.80  | 90 | 75 | 70 | 5.4 | -15.70  |
| 0 | 75 | 70 | 5.5 | -17.30  | 30 | 75 | 70 | 5.5 | -16.14  | 60 | 75 | 70 | 5.5 | -14.11  | 90 | 75 | 70 | 5.5 | -14.04  |
| 0 | 75 | 70 | 5.6 | -15.54  | 30 | 75 | 70 | 5.6 | -14.48  | 60 | 75 | 70 | 5.6 | -12.63  | 90 | 75 | 70 | 5.6 | -12.58  |
| 0 | 75 | 70 | 5.7 | -13.99  | 30 | 75 | 70 | 5.7 | -13.01  | 60 | 75 | 70 | 5.7 | -11.32  | 90 | 75 | 70 | 5.7 | -11.29  |
| 0 | 75 | 70 | 5.8 | -12.61  | 30 | 75 | 70 | 5.8 | -11.71  | 60 | 75 | 70 | 5.8 | -10.16  | 90 | 75 | 70 | 5.8 | -10.15  |
| 0 | 75 | 70 | 5.9 | -11.38  | 30 | 75 | 70 | 5.9 | -10.56  | 60 | 75 | 70 | 5.9 | -9.13   | 90 | 75 | 70 | 5.9 | -9.14   |
| 0 | 75 | 70 | 6   | -10.29  | 30 | 75 | 70 | 6   | -9.53   | 60 | 75 | 70 | 6   | -8.22   | 90 | 75 | 70 | 6   | -8.24   |
| 0 | 75 | 70 | 6.5 | -6.37   | 30 | 75 | 70 | 6.5 | -5.86   | 60 | 75 | 70 | 6.5 | -4.99   | 90 | 75 | 70 | 6.5 | -5.04   |
| 0 | 75 | 70 | 7   | -4.09   | 30 | 75 | 70 | 7   | -3.74   | 60 | 75 | 70 | 7   | -3.15   | 90 | 75 | 70 | 7   | -3.20   |
| 0 | 75 | 70 | 7.5 | -2.71   | 30 | 75 | 70 | 7.5 | -2.46   | 60 | 75 | 70 | 7.5 | -2.05   | 90 | 75 | 70 | 7.5 | -2.10   |
| 0 | 75 | 70 | 8   | -1.84   | 30 | 75 | 70 | 8   | -1.66   | 60 | 75 | 70 | 8   | -1.37   | 90 | 75 | 70 | 8   | -1.42   |
| 0 | 75 | 70 | 8.5 | -1.28   | 30 | 75 | 70 | 8.5 | -1.15   | 60 | 75 | 70 | 8.5 | -0.94   | 90 | 75 | 70 | 8.5 | -0.98   |
| 0 | 75 | 70 | 9   | -0.91   | 30 | 75 | 70 | 9   | -0.81   | 60 | 75 | 70 | 9   | -0.65   | 90 | 75 | 70 | 9   | -0.69   |
| 0 | 75 | 70 | 9.5 | -0.66   | 30 | 75 | 70 | 9.5 | -0.58   | 60 | 75 | 70 | 9.5 | -0.47   | 90 | 75 | 70 | 9.5 | -0.50   |
| 0 | 75 | 70 | 10  | -0.48   | 30 | 75 | 70 | 10  | -0.43   | 60 | 75 | 70 | 10  | -0.33   | 90 | 75 | 70 | 10  | -0.36   |
| 0 | 75 | 70 | 12  | -0.16   | 30 | 75 | 70 | 12  | -0.14   | 60 | 75 | 70 | 12  | -0.10   | 90 | 75 | 70 | 12  | -0.12   |
| 0 | 75 | 70 | 15  | -0.04   | 30 | 75 | 70 | 15  | -0.03   | 60 | 75 | 70 | 15  | -0.02   | 90 | 75 | 70 | 15  | -0.03   |
| 0 | 75 | 70 | 20  | 0.00    | 30 | 75 | 70 | 20  | 0.00    | 60 | 75 | 70 | 20  | 0.00    | 90 | 75 | 70 | 20  | 0.00    |
| 0 | 75 | 80 | 2.5 | 1011.69 | 30 | 75 | 80 | 2.5 | 1035.03 | 60 | 75 | 80 | 2.5 | 1081.86 | 90 | 75 | 80 | 2.5 | 1109.53 |
| 0 | 75 | 80 | 2.6 | 444.28  | 30 | 75 | 80 | 2.6 | 465.30  | 60 | 75 | 80 | 2.6 | 497.16  | 90 | 75 | 80 | 2.6 | 530.50  |
| 0 | 75 | 80 | 2.7 | 66.95   | 30 | 75 | 80 | 2.7 | 85.81   | 60 | 75 | 80 | 2.7 | 123.02  | 90 | 75 | 80 | 2.7 | 142.53  |
| 0 | 75 | 80 | 2.8 | -46.75  | 30 | 75 | 80 | 2.8 | -29.85  | 60 | 75 | 80 | 2.8 | 3.16    | 90 | 75 | 80 | 2.8 | 19.47   |
| 0 | 75 | 80 | 2.9 | -116.10 | 30 | 75 | 80 | 2.9 | -100.96 | 60 | 75 | 80 | 2.9 | -71.67  | 90 | 75 | 80 | 2.9 | -57.96  |
| 0 | 75 | 80 | 3   | -154.93 | 30 | 75 | 80 | 3   | -141.41 | 60 | 75 | 80 | 3   | -115.43 | 90 | 75 | 80 | 3   | -103.80 |
| 0 | 75 | 80 | 3.1 | -173.14 | 30 | 75 | 80 | 3.1 | -161.10 | 60 | 75 | 80 | 3.1 | -138.08 | 90 | 75 | 80 | 3.1 | -128.15 |
| 0 | 75 | 80 | 3.2 | -177.76 | 30 | 75 | 80 | 3.2 | -167.08 | 60 | 75 | 80 | 3.2 | -146.71 | 90 | 75 | 80 | 3.2 | -138.20 |
| 0 | 75 | 80 | 3.3 | -173.78 | 30 | 75 | 80 | 3.3 | -164.33 | 60 | 75 | 80 | 3.3 | -146.30 | 90 | 75 | 80 | 3.3 | -138.99 |
| 0 | 75 | 80 | 3.4 | -164.69 | 30 | 75 | 80 | 3.4 | -156.33 | 60 | 75 | 80 | 3.4 | -140.35 | 90 | 75 | 80 | 3.4 | -134.04 |
| 0 | 75 | 80 | 3.5 | -152.87 | 30 | 75 | 80 | 3.5 | -145.45 | 60 | 75 | 80 | 3.5 | -131.24 | 90 | 75 | 80 | 3.5 | -125.77 |
| 0 |    |    |     |         |    |    |    |     |         |    |    |    |     |         |    |    |    |     |         |

|   |    |    |     |                |    |    |    |     |                |    |    |    |     |                |    |    |    |     |                |
|---|----|----|-----|----------------|----|----|----|-----|----------------|----|----|----|-----|----------------|----|----|----|-----|----------------|
| 0 | 75 | 80 | 5.3 | -20.77         | 30 | 75 | 80 | 5.3 | -19.42         | 60 | 75 | 80 | 5.3 | -16.88         | 90 | 75 | 80 | 5.3 | -16.11         |
| 0 | 75 | 80 | 5.4 | -18.74         | 30 | 75 | 80 | 5.4 | -17.49         | 60 | 75 | 80 | 5.4 | -15.15         | 90 | 75 | 80 | 5.4 | -14.45         |
| 0 | 75 | 80 | 5.5 | -16.93         | 30 | 75 | 80 | 5.5 | -15.78         | 60 | 75 | 80 | 5.5 | -13.62         | 90 | 75 | 80 | 5.5 | -12.98         |
| 0 | 75 | 80 | 5.6 | -15.33         | 30 | 75 | 80 | 5.6 | -14.26         | 60 | 75 | 80 | 5.6 | -12.27         | 90 | 75 | 80 | 5.6 | -11.68         |
| 0 | 75 | 80 | 5.7 | -13.90         | 30 | 75 | 80 | 5.7 | -12.92         | 60 | 75 | 80 | 5.7 | -11.07         | 90 | 75 | 80 | 5.7 | -10.53         |
| 0 | 75 | 80 | 5.8 | -12.63         | 30 | 75 | 80 | 5.8 | -11.72         | 60 | 75 | 80 | 5.8 | -10.01         | 90 | 75 | 80 | 5.8 | -9.52          |
| 0 | 75 | 80 | 5.9 | -11.49         | 30 | 75 | 80 | 5.9 | -10.64         | 60 | 75 | 80 | 5.9 | -9.06          | 90 | 75 | 80 | 5.9 | -8.61          |
| 0 | 75 | 80 | 6   | -10.47         | 30 | 75 | 80 | 6   | -9.69          | 60 | 75 | 80 | 6   | -8.22          | 90 | 75 | 80 | 6   | -7.81          |
| 0 | 75 | 80 | 6.5 | -6.74          | 30 | 75 | 80 | 6.5 | -6.19          | 60 | 75 | 80 | 6.5 | -5.17          | 90 | 75 | 80 | 6.5 | -4.90          |
| 0 | 75 | 80 | 7   | -4.48          | 30 | 75 | 80 | 7   | -4.09          | 60 | 75 | 80 | 7   | -3.37          | 90 | 75 | 80 | 7   | -3.18          |
| 0 | 75 | 80 | 7.5 | -3.07          | 30 | 75 | 80 | 7.5 | -2.79          | 60 | 75 | 80 | 7.5 | -2.26          | 90 | 75 | 80 | 7.5 | -2.13          |
| 0 | 75 | 80 | 8   | -2.15          | 30 | 75 | 80 | 8   | -1.94          | 60 | 75 | 80 | 8   | -1.56          | 90 | 75 | 80 | 8   | -1.46          |
| 0 | 75 | 80 | 8.5 | -1.54          | 30 | 75 | 80 | 8.5 | -1.38          | 60 | 75 | 80 | 8.5 | -1.10          | 90 | 75 | 80 | 8.5 | -1.03          |
| 0 | 75 | 80 | 9   | -1.12          | 30 | 75 | 80 | 9   | -1.01          | 60 | 75 | 80 | 9   | -0.79          | 90 | 75 | 80 | 9   | -0.74          |
| 0 | 75 | 80 | 9.5 | -0.83          | 30 | 75 | 80 | 9.5 | -0.74          | 60 | 75 | 80 | 9.5 | -0.58          | 90 | 75 | 80 | 9.5 | -0.54          |
| 0 | 75 | 80 | 10  | -0.63          | 30 | 75 | 80 | 10  | -0.55          | 60 | 75 | 80 | 10  | -0.43          | 90 | 75 | 80 | 10  | -0.40          |
| 0 | 75 | 80 | 12  | -0.22          | 30 | 75 | 80 | 12  | -0.19          | 60 | 75 | 80 | 12  | -0.14          | 90 | 75 | 80 | 12  | -0.13          |
| 0 | 75 | 80 | 15  | -0.05          | 30 | 75 | 80 | 15  | -0.05          | 60 | 75 | 80 | 15  | -0.03          | 90 | 75 | 80 | 15  | -0.03          |
| 0 | 75 | 80 | 20  | 0.00           | 30 | 75 | 80 | 20  | 0.00           | 60 | 75 | 80 | 20  | 0.00           | 90 | 75 | 80 | 20  | 0.00           |
| 0 | 75 | 90 | 2.5 | 983.27         | 30 | 75 | 90 | 2.5 | 909.12         | 60 | 75 | 90 | 2.5 | 960.04         | 90 | 75 | 90 | 2.5 | 985.33         |
| 0 | 75 | 90 | 2.6 | 372.63         | 30 | 75 | 90 | 2.6 | 395.60         | 60 | 75 | 90 | 2.6 | 440.87         | 90 | 75 | 90 | 2.6 | 463.28         |
| 0 | 75 | 90 | 2.7 | -61.13         | 30 | 75 | 90 | 2.7 | -40.77         | 60 | 75 | 90 | 2.7 | -0.67          | 90 | 75 | 90 | 2.7 | 19.06          |
| 0 | 75 | 90 | 2.8 | -141.64        | 30 | 75 | 90 | 2.8 | -123.61        | 60 | 75 | 90 | 2.8 | -88.07         | 90 | 75 | 90 | 2.8 | -70.66         |
| 0 | 75 | 90 | 2.9 | -185.81        | 30 | 75 | 90 | 2.9 | -169.83        | 60 | 75 | 90 | 2.9 | -138.30        | 90 | 75 | 90 | 2.9 | -122.88        |
| 0 | 75 | 90 | 3   | -205.63        | 30 | 75 | 90 | 3   | -191.47        | 60 | 75 | 90 | 3   | -163.50        | 90 | 75 | 90 | 3   | -149.79        |
| 0 | 75 | 90 | 3.1 | <b>-209.59</b> | 30 | 75 | 90 | 3.1 | <b>-197.06</b> | 60 | 75 | 90 | 3.1 | <b>-172.27</b> | 90 | 75 | 90 | 3.1 | <b>-160.07</b> |
| 0 | 75 | 90 | 3.2 | -203.66        | 30 | 75 | 90 | 3.2 | -192.59        | 60 | 75 | 90 | 3.2 | -170.64        | 90 | 75 | 90 | 3.2 | -159.80        |
| 0 | 75 | 90 | 3.3 | -192.00        | 30 | 75 | 90 | 3.3 | -182.21        | 60 | 75 | 90 | 3.3 | -162.77        | 90 | 75 | 90 | 3.3 | -153.14        |
| 0 | 75 | 90 | 3.4 | -177.39        | 30 | 75 | 90 | 3.4 | -168.72        | 60 | 75 | 90 | 3.4 | -151.47        | 90 | 75 | 90 | 3.4 | -142.90        |
| 0 | 75 | 90 | 3.5 | -161.66        | 30 | 75 | 90 | 3.5 | -153.94        | 60 | 75 | 90 | 3.5 | -138.58        | 90 | 75 | 90 | 3.5 | -130.93        |
| 0 | 75 | 90 | 3.6 | -145.92        | 30 | 75 | 90 | 3.6 | -139.02        | 60 | 75 | 90 | 3.6 | -125.28        | 90 | 75 | 90 | 3.6 | -118.44        |
| 0 | 75 | 90 | 3.7 | -130.84        | 30 | 75 | 90 | 3.7 | -124.64        | 60 | 75 | 90 | 3.7 | -112.30        | 90 | 75 | 90 | 3.7 | -106.16        |
| 0 | 75 | 90 | 3.8 | -116.79        | 30 | 75 | 90 | 3.8 | -111.20        | 60 | 75 | 90 | 3.8 | -100.08        | 90 | 75 | 90 | 3.8 | -94.54         |
| 0 | 75 | 90 | 3.9 | -103.94        | 30 | 75 | 90 | 3.9 | -98.88         | 60 | 75 | 90 | 3.9 | -88.83         | 90 | 75 | 90 | 3.9 | -83.82         |
| 0 | 75 | 90 | 4   | -92.34         | 30 | 75 | 90 | 4   | -87.75         | 60 | 75 | 90 | 4   | -78.64         | 90 | 75 | 90 | 4   | -74.10         |
| 0 | 75 | 90 | 4.1 | -81.97         | 30 | 75 | 90 | 4.1 | -77.81         | 60 | 75 | 90 | 4.1 | -69.53         | 90 | 75 | 90 | 4.1 | -65.40         |
| 0 | 75 | 90 | 4.2 | -72.76         | 30 | 75 | 90 | 4.2 | -68.97         | 60 | 75 | 90 | 4.2 | -61.44         | 90 | 75 | 90 | 4.2 | -57.68         |
| 0 | 75 | 90 | 4.3 | -64.62         | 30 | 75 | 90 | 4.3 | -61.17         | 60 | 75 | 90 | 4.3 | -54.30         | 90 | 75 | 90 | 4.3 | -50.88         |
| 0 | 75 | 90 | 4.4 | -57.45         | 30 | 75 | 90 | 4.4 | -54.30         | 60 | 75 | 90 | 4.4 | -48.03         | 90 | 75 | 90 | 4.4 | -44.90         |
| 0 | 75 | 90 | 4.5 | -51.15         | 30 | 75 | 90 | 4.5 | -48.26         | 60 | 75 | 90 | 4.5 | -42.52         | 90 | 75 | 90 | 4.5 | -39.67         |
| 0 | 75 | 90 | 4.6 | -45.61         | 30 | 75 | 90 | 4.6 | -42.96         | 60 | 75 | 90 | 4.6 | -37.71         | 90 | 75 | 90 | 4.6 | -35.09         |
| 0 | 75 | 90 | 4.7 | -40.74         | 30 | 75 | 90 | 4.7 | -38.32         | 60 | 75 | 90 | 4.7 | -33.49         | 90 | 75 | 90 | 4.7 | -31.09         |
| 0 | 75 | 90 | 4.8 | -36.46         | 30 | 75 | 90 | 4.8 | -34.23         | 60 | 75 | 90 | 4.8 | -29.80         | 90 | 75 | 90 | 4.8 | -27.59         |
| 0 | 75 | 90 | 4.9 | -32.69         | 30 | 75 | 90 | 4.9 | -30.65         | 60 | 75 | 90 | 4.9 | -26.57         | 90 | 75 | 90 | 4.9 | -24.54         |
| 0 | 75 | 90 | 5   | -29.37         | 30 | 75 | 90 | 5   | -27.49         | 60 | 75 | 90 | 5   | -23.73         | 90 | 75 | 90 | 5   | -21.86         |
| 0 | 75 | 90 | 5.1 | -26.44         | 30 | 75 | 90 | 5.1 | -24.71         | 60 | 75 | 90 | 5.1 | -21.25         | 90 | 75 | 90 | 5.1 | -19.52         |
| 0 | 75 | 90 | 5.2 | -23.85         | 30 | 75 | 90 | 5.2 | -22.25         | 60 | 75 | 90 | 5.2 | -19.05         | 90 | 75 | 90 | 5.2 | -17.46         |
| 0 | 75 | 90 | 5.3 | -21.56         | 30 | 75 | 90 | 5.3 | -20.08         | 60 | 75 | 90 | 5.3 | -17.12         | 90 | 75 | 90 | 5.3 | -15.65         |
| 0 | 75 | 90 | 5.4 | -19.53         | 30 | 75 | 90 | 5.4 | -18.15         | 60 | 75 | 90 | 5.4 | -15.42         | 90 | 75 | 90 | 5.4 | -14.05         |
| 0 | 75 | 90 | 5.5 | -17.72         | 30 | 75 | 90 | 5.5 | -16.45         | 60 | 75 | 90 | 5.5 | -13.91         | 90 | 75 | 90 | 5.5 | -12.65         |
| 0 | 75 | 90 | 5.6 | -16.10         | 30 | 75 | 90 | 5.6 | -14.92         | 60 | 75 | 90 | 5.6 | -12.58         | 90 | 75 | 90 | 5.6 | -11.40         |
| 0 | 75 | 90 | 5.7 | -14.66         | 30 | 75 | 90 | 5.7 | -13.57         | 60 | 75 | 90 | 5.7 | -11.39         | 90 | 75 | 90 | 5.7 | -10.30         |
| 0 | 75 | 90 | 5.8 | -13.37         | 30 | 75 | 90 | 5.8 | -12.36         | 60 | 75 | 90 | 5.8 | -10.33         | 90 | 75 | 90 | 5.8 | -9.32          |
| 0 | 75 | 90 | 5.9 | -12.22         | 30 | 75 | 90 | 5.9 | -11.27         | 60 | 75 | 90 | 5.9 | -9.39          | 90 | 75 | 90 | 5.9 | -8.45          |
| 0 | 75 | 90 | 6   | -11.18         | 30 | 75 | 90 | 6   | -10.30         | 60 | 75 | 90 | 6   | -8.55          | 90 | 75 | 90 | 6   | -7.67          |
| 0 | 75 | 90 | 6.5 | -7.33          | 30 | 75 | 90 | 6.5 | -6.71          | 60 | 75 | 90 | 6.5 | -5.47          | 90 | 75 | 90 | 6.5 | -4.85          |
| 0 | 75 | 90 | 7   | -4.96          | 30 | 75 | 90 | 7   | -4.52          | 60 | 75 | 90 | 7   | -3.62          | 90 | 75 | 90 | 7   | -3.18          |
| 0 | 75 | 90 | 7.5 | -3.45          | 30 | 75 | 90 | 7.5 | -3.13          | 60 | 75 | 90 | 7.5 | -2.47          | 90 | 75 | 90 | 7.5 | -2.14          |
| 0 | 75 | 90 | 8   | -2.46          | 30 | 75 | 90 | 8   | -2.21          | 60 | 75 | 90 | 8   | -1.73          | 90 | 75 | 90 | 8   | -1.48          |
| 0 | 75 | 90 | 8.5 | -1.78          | 30 | 75 | 90 | 8.5 | -1.60          | 60 | 75 | 90 | 8.5 | -1.23          | 90 | 75 | 90 | 8.5 | -1.04          |
| 0 | 75 | 90 | 9   | -1.32          | 30 | 75 | 90 | 9   | -1.18          | 60 | 75 | 90 | 9   | -0.89          | 90 | 75 | 90 | 9   | -0.75          |
| 0 | 75 | 90 | 9.5 | -0.99          | 30 | 75 | 90 | 9.5 | -0.88          | 60 | 75 | 90 | 9.5 | -0.66          | 90 | 75 | 90 | 9.5 | -0.55          |
| 0 | 75 | 90 | 10  | -0.75          | 30 | 75 | 90 | 10  | -0.67          | 60 | 75 | 90 | 10  | -0.49          | 90 | 75 | 90 | 10  | -0.41          |
| 0 | 75 | 90 | 12  | -0.28          | 30 | 75 | 90 | 12  | -0.24          | 60 | 75 | 90 | 12  | -0.17          | 90 | 75 | 90 | 12  | -0.14          |
| 0 | 75 | 90 | 15  | -0.07          | 30 | 75 | 90 | 15  | -0.06          | 60 | 75 | 90 | 15  | -0.04          | 90 | 75 | 90 | 15  | -0.03          |
| 0 | 75 | 90 | 20  | 0.00           | 30 | 75 | 90 | 20  | 0.00           | 60 | 75 | 90 | 20  | 0.00           | 90 | 75 | 90 | 20  | 0.00           |
| 0 | 90 | 0  | 2.5 | 88766.35       | 30 | 90 | 0  | 2.5 | 88766.35       | 60 | 90 | 0  | 2.5 | 88766.35       | 90 | 90 | 0  | 2.5 | 88766.35       |
| 0 | 90 | 0  | 2.6 | 63225.26       | 30 | 90 | 0  | 2.6 | 63225.26       | 60 | 90 | 0  | 2.6 | 63225.26       | 90 | 90 | 0  | 2.6 | 63225.26       |
| 0 | 90 | 0  | 2.7 | 51651.34       | 30 | 90 | 0  | 2.7 | 51651.34       | 60 | 90 | 0  | 2.7 | 51651.34       | 90 | 90 | 0  | 2.7 | 51651.34       |
| 0 | 90 | 0  | 2.8 | 48785.11       | 30 | 90 | 0  | 2.8 | 48785.11       | 60 | 90 | 0  | 2.8 | 48785.11       | 90 | 90 | 0  | 2.8 | 48785.11       |
| 0 | 90 | 0  | 2.9 | 51091.48       | 30 | 90 | 0  | 2.9 | 51091.48       | 60 | 90 | 0  | 2.9 | 51091.48       | 90 | 90 | 0  | 2.9 | 51091.49       |
| 0 | 90 | 0  | 3   | 56128.19       | 30 | 90 | 0  | 3   | 56128.19       | 60 | 90 | 0  | 3   | 56128.19       | 90 | 90 | 0  | 3   | 56128.19       |
| 0 | 90 | 0  | 3.1 | 61531.24       | 30 | 90 | 0  | 3.1 | 61531.24       | 60 | 90 | 0  | 3.1 | 61531.24       | 90 | 90 | 0  | 3.1 | 61531.24       |
| 0 | 90 | 0  | 3.2 | 43920.21       | 30 | 90 | 0  | 3.2 | 43920.21       | 60 | 90 | 0  | 3.2 | 43920.21       | 90 | 90 | 0  | 3.2 | 43920.21       |
| 0 | 90 | 0  | 3.3 | 33811.24       | 30 | 90 | 0  | 3.3 | 33811.24       | 60 | 90 | 0  | 3.3 | 33811.24       | 90 | 90 | 0  | 3.3 | 33811.24       |
| 0 | 90 | 0  | 3.4 | 25743.33       | 30 | 90 | 0  | 3.4 | 25743.33       | 60 | 90 | 0  | 3.4 | 25743.33       | 90 | 90 | 0  | 3.4 | 25743.33       |
| 0 | 90 | 0  | 3.5 | 19425.66       | 30 | 90 | 0  | 3.5 | 19425.66       | 60 | 90 | 0  | 3.5 | 19425.66       | 90 | 90 | 0  | 3.5 | 19425.66       |
| 0 | 90 | 0  | 3.6 | 14544.67       | 30 | 90 | 0  | 3.6 | 14544.67       | 60 | 90 | 0  |     |                |    |    |    |     |                |

|   |    |    |     |               |    |    |    |     |               |    |    |    |     |               |    |    |    |     |               |
|---|----|----|-----|---------------|----|----|----|-----|---------------|----|----|----|-----|---------------|----|----|----|-----|---------------|
| 0 | 90 | 0  | 5.4 | -0.55         | 30 | 90 | 0  | 5.4 | -0.55         | 60 | 90 | 0  | 5.4 | -0.55         | 90 | 90 | 0  | 5.4 | -0.55         |
| 0 | 90 | 0  | 5.5 | -7.21         | 30 | 90 | 0  | 5.5 | -7.21         | 60 | 90 | 0  | 5.5 | -7.21         | 90 | 90 | 0  | 5.5 | -7.21         |
| 0 | 90 | 0  | 5.6 | -10.85        | 30 | 90 | 0  | 5.6 | -10.85        | 60 | 90 | 0  | 5.6 | -10.85        | 90 | 90 | 0  | 5.6 | -10.85        |
| 0 | 90 | 0  | 5.7 | -12.47        | 30 | 90 | 0  | 5.7 | -12.47        | 60 | 90 | 0  | 5.7 | -12.47        | 90 | 90 | 0  | 5.7 | -12.47        |
| 0 | 90 | 0  | 5.8 | <b>-12.80</b> | 30 | 90 | 0  | 5.8 | <b>-12.80</b> | 60 | 90 | 0  | 5.8 | <b>-12.80</b> | 90 | 90 | 0  | 5.8 | <b>-12.80</b> |
| 0 | 90 | 0  | 5.9 | -12.35        | 30 | 90 | 0  | 5.9 | -12.35        | 60 | 90 | 0  | 5.9 | -12.35        | 90 | 90 | 0  | 5.9 | -12.35        |
| 0 | 90 | 0  | 6   | -11.45        | 30 | 90 | 0  | 6   | -11.45        | 60 | 90 | 0  | 6   | -11.45        | 90 | 90 | 0  | 6   | -11.45        |
| 0 | 90 | 0  | 6.5 | -5.84         | 30 | 90 | 0  | 6.5 | -5.84         | 60 | 90 | 0  | 6.5 | -5.84         | 90 | 90 | 0  | 6.5 | -5.84         |
| 0 | 90 | 0  | 7   | -2.26         | 30 | 90 | 0  | 7   | -2.26         | 60 | 90 | 0  | 7   | -2.26         | 90 | 90 | 0  | 7   | -2.26         |
| 0 | 90 | 0  | 7.5 | -0.57         | 30 | 90 | 0  | 7.5 | -0.57         | 60 | 90 | 0  | 7.5 | -0.57         | 90 | 90 | 0  | 7.5 | -0.57         |
| 0 | 90 | 0  | 8   | 0.13          | 30 | 90 | 0  | 8   | 0.13          | 60 | 90 | 0  | 8   | 0.13          | 90 | 90 | 0  | 8   | 0.13          |
| 0 | 90 | 0  | 8.5 | 0.36          | 30 | 90 | 0  | 8.5 | 0.36          | 60 | 90 | 0  | 8.5 | 0.36          | 90 | 90 | 0  | 8.5 | 0.36          |
| 0 | 90 | 0  | 9   | 0.42          | 30 | 90 | 0  | 9   | 0.42          | 60 | 90 | 0  | 9   | 0.42          | 90 | 90 | 0  | 9   | 0.42          |
| 0 | 90 | 0  | 9.5 | 0.40          | 30 | 90 | 0  | 9.5 | 0.40          | 60 | 90 | 0  | 9.5 | 0.40          | 90 | 90 | 0  | 9.5 | 0.40          |
| 0 | 90 | 0  | 10  | 0.36          | 30 | 90 | 0  | 10  | 0.36          | 60 | 90 | 0  | 10  | 0.36          | 90 | 90 | 0  | 10  | 0.36          |
| 0 | 90 | 0  | 12  | 0.19          | 30 | 90 | 0  | 12  | 0.19          | 60 | 90 | 0  | 12  | 0.19          | 90 | 90 | 0  | 12  | 0.19          |
| 0 | 90 | 0  | 15  | 0.06          | 30 | 90 | 0  | 15  | 0.06          | 60 | 90 | 0  | 15  | 0.06          | 90 | 90 | 0  | 15  | 0.06          |
| 0 | 90 | 0  | 20  | 0.00          | 30 | 90 | 0  | 20  | 0.00          | 60 | 90 | 0  | 20  | 0.00          | 90 | 90 | 0  | 20  | 0.00          |
| 0 | 90 | 10 | 2.5 | 88932.92      | 30 | 90 | 10 | 2.5 | 82679.63      | 60 | 90 | 10 | 2.5 | 71597.27      | 90 | 90 | 10 | 2.5 | 66712.91      |
| 0 | 90 | 10 | 2.6 | 62376.85      | 30 | 90 | 10 | 2.6 | 60020.11      | 60 | 90 | 10 | 2.6 | 56100.91      | 90 | 90 | 10 | 2.6 | 54619.15      |
| 0 | 90 | 10 | 2.7 | 49964.13      | 30 | 90 | 10 | 2.7 | 49614.31      | 60 | 90 | 10 | 2.7 | 49708.33      | 90 | 90 | 10 | 2.7 | 50477.17      |
| 0 | 90 | 10 | 2.8 | 45264.99      | 30 | 90 | 10 | 2.8 | 46006.50      | 60 | 90 | 10 | 2.8 | 48594.58      | 90 | 90 | 10 | 2.8 | 51462.26      |
| 0 | 90 | 10 | 2.9 | 43930.42      | 30 | 90 | 10 | 2.9 | 45198.90      | 60 | 90 | 10 | 2.9 | 49131.10      | 90 | 90 | 10 | 2.9 | 55388.90      |
| 0 | 90 | 10 | 3   | 42340.67      | 30 | 90 | 10 | 3   | 43511.21      | 60 | 90 | 10 | 3   | 46539.24      | 90 | 90 | 10 | 3   | 48712.14      |
| 0 | 90 | 10 | 3.1 | 38082.17      | 30 | 90 | 10 | 3.1 | 38737.81      | 60 | 90 | 10 | 3.1 | 40154.92      | 90 | 90 | 10 | 3.1 | 40923.57      |
| 0 | 90 | 10 | 3.2 | 31825.28      | 30 | 90 | 10 | 3.2 | 32135.79      | 60 | 90 | 10 | 3.2 | 32768.15      | 90 | 90 | 10 | 3.2 | 33091.12      |
| 0 | 90 | 10 | 3.3 | 25454.76      | 30 | 90 | 10 | 3.3 | 25610.10      | 60 | 90 | 10 | 3.3 | 25919.93      | 90 | 90 | 10 | 3.3 | 26074.90      |
| 0 | 90 | 10 | 3.4 | 19841.92      | 30 | 90 | 10 | 3.4 | 19927.28      | 60 | 90 | 10 | 3.4 | 20095.61      | 90 | 90 | 10 | 3.4 | 20178.78      |
| 0 | 90 | 10 | 3.5 | 15205.53      | 30 | 90 | 10 | 3.5 | 15256.83      | 60 | 90 | 10 | 3.5 | 15357.19      | 90 | 90 | 10 | 3.5 | 15406.34      |
| 0 | 90 | 10 | 3.6 | 11505.66      | 30 | 90 | 10 | 3.6 | 11538.96      | 60 | 90 | 10 | 3.6 | 11603.81      | 90 | 90 | 10 | 3.6 | 11635.39      |
| 0 | 90 | 10 | 3.7 | 8616.25       | 30 | 90 | 10 | 3.7 | 8639.36       | 60 | 90 | 10 | 3.7 | 8684.19       | 90 | 90 | 10 | 3.7 | 8705.94       |
| 0 | 90 | 10 | 3.8 | 6393.66       | 30 | 90 | 10 | 3.8 | 6410.53       | 60 | 90 | 10 | 3.8 | 6443.23       | 90 | 90 | 10 | 3.8 | 6459.07       |
| 0 | 90 | 10 | 3.9 | 4703.70       | 30 | 90 | 10 | 3.9 | 4716.51       | 60 | 90 | 10 | 3.9 | 4741.33       | 90 | 90 | 10 | 3.9 | 4753.37       |
| 0 | 90 | 10 | 4   | 3431.19       | 30 | 90 | 10 | 4   | 3441.20       | 60 | 90 | 10 | 4   | 3460.62       | 90 | 90 | 10 | 4   | 3470.08       |
| 0 | 90 | 10 | 4.1 | 2481.31       | 30 | 90 | 10 | 4.1 | 2489.31       | 60 | 90 | 10 | 4.1 | 2504.85       | 90 | 90 | 10 | 4.1 | 2512.45       |
| 0 | 90 | 10 | 4.2 | 1777.98       | 30 | 90 | 10 | 4.2 | 1784.47       | 60 | 90 | 10 | 4.2 | 1797.12       | 90 | 90 | 10 | 4.2 | 1803.32       |
| 0 | 90 | 10 | 4.3 | 1261.23       | 30 | 90 | 10 | 4.3 | 1266.56       | 60 | 90 | 10 | 4.3 | 1276.96       | 90 | 90 | 10 | 4.3 | 1282.07       |
| 0 | 90 | 10 | 4.4 | 884.50        | 30 | 90 | 10 | 4.4 | 888.87        | 60 | 90 | 10 | 4.4 | 897.44        | 90 | 90 | 10 | 4.4 | 901.67        |
| 0 | 90 | 10 | 4.5 | 611.90        | 30 | 90 | 10 | 4.5 | 615.50        | 60 | 90 | 10 | 4.5 | 622.57        | 90 | 90 | 10 | 4.5 | 626.06        |
| 0 | 90 | 10 | 4.6 | 416.22        | 30 | 90 | 10 | 4.6 | 419.19        | 60 | 90 | 10 | 4.6 | 425.03        | 90 | 90 | 10 | 4.6 | 427.91        |
| 0 | 90 | 10 | 4.7 | 277.01        | 30 | 90 | 10 | 4.7 | 279.45        | 60 | 90 | 10 | 4.7 | 284.29        | 90 | 90 | 10 | 4.7 | 286.68        |
| 0 | 90 | 10 | 4.8 | 179.00        | 30 | 90 | 10 | 4.8 | 181.06        | 60 | 90 | 10 | 4.8 | 185.08        | 90 | 90 | 10 | 4.8 | 187.08        |
| 0 | 90 | 10 | 4.9 | 110.92        | 30 | 90 | 10 | 4.9 | 112.65        | 60 | 90 | 10 | 4.9 | 116.03        | 90 | 90 | 10 | 4.9 | 117.70        |
| 0 | 90 | 10 | 5   | 64.33         | 30 | 90 | 10 | 5   | 65.79         | 60 | 90 | 10 | 5   | 68.65         | 90 | 90 | 10 | 5   | 70.05         |
| 0 | 90 | 10 | 5.1 | 33.00         | 30 | 90 | 10 | 5.1 | 34.24         | 60 | 90 | 10 | 5.1 | 36.67         | 90 | 90 | 10 | 5.1 | 37.86         |
| 0 | 90 | 10 | 5.2 | 12.39         | 30 | 90 | 10 | 5.2 | 13.45         | 60 | 90 | 10 | 5.2 | 15.51         | 90 | 90 | 10 | 5.2 | 16.54         |
| 0 | 90 | 10 | 5.3 | -0.75         | 30 | 90 | 10 | 5.3 | 0.15          | 60 | 90 | 10 | 5.3 | 1.92          | 90 | 90 | 10 | 5.3 | 2.79          |
| 0 | 90 | 10 | 5.4 | -8.74         | 30 | 90 | 10 | 5.4 | -7.97         | 60 | 90 | 10 | 5.4 | -6.45         | 90 | 90 | 10 | 5.4 | -5.70         |
| 0 | 90 | 10 | 5.5 | -13.20        | 30 | 90 | 10 | 5.5 | -12.54        | 60 | 90 | 10 | 5.5 | -11.24        | 90 | 90 | 10 | 5.5 | -10.59        |
| 0 | 90 | 10 | 5.6 | -15.29        | 30 | 90 | 10 | 5.6 | -14.72        | 60 | 90 | 10 | 5.6 | -13.60        | 90 | 90 | 10 | 5.6 | -13.04        |
| 0 | 90 | 10 | 5.7 | <b>-15.81</b> | 30 | 90 | 10 | 5.7 | <b>-15.34</b> | 60 | 90 | 10 | 5.7 | <b>-14.37</b> | 90 | 90 | 10 | 5.7 | <b>-13.86</b> |
| 0 | 90 | 10 | 5.8 | -15.40        | 30 | 90 | 10 | 5.8 | -14.98        | 60 | 90 | 10 | 5.8 | -14.14        | 90 | 90 | 10 | 5.8 | -13.72        |
| 0 | 90 | 10 | 5.9 | -14.41        | 30 | 90 | 10 | 5.9 | -14.04        | 60 | 90 | 10 | 5.9 | -13.30        | 90 | 90 | 10 | 5.9 | -12.94        |
| 0 | 90 | 10 | 6   | -13.11        | 30 | 90 | 10 | 6   | -12.79        | 60 | 90 | 10 | 6   | -12.15        | 90 | 90 | 10 | 6   | -11.83        |
| 0 | 90 | 10 | 6.5 | -6.60         | 30 | 90 | 10 | 6.5 | -6.42         | 60 | 90 | 10 | 6.5 | -6.08         | 90 | 90 | 10 | 6.5 | -5.91         |
| 0 | 90 | 10 | 7   | -2.73         | 30 | 90 | 10 | 7   | -2.63         | 60 | 90 | 10 | 7   | -2.44         | 90 | 90 | 10 | 7   | -2.34         |
| 0 | 90 | 10 | 7.5 | -0.91         | 30 | 90 | 10 | 7.5 | -0.85         | 60 | 90 | 10 | 7.5 | -0.73         | 90 | 90 | 10 | 7.5 | -0.67         |
| 0 | 90 | 10 | 8   | -0.13         | 30 | 90 | 10 | 8   | -0.09         | 60 | 90 | 10 | 8   | -0.01         | 90 | 90 | 10 | 8   | 0.03          |
| 0 | 90 | 10 | 8.5 | 0.19          | 30 | 90 | 10 | 8.5 | 0.21          | 60 | 90 | 10 | 8.5 | 0.26          | 90 | 90 | 10 | 8.5 | 0.29          |
| 0 | 90 | 10 | 9   | 0.29          | 30 | 90 | 10 | 9   | 0.31          | 60 | 90 | 10 | 9   | 0.34          | 90 | 90 | 10 | 9   | 0.36          |
| 0 | 90 | 10 | 9.5 | 0.31          | 30 | 90 | 10 | 9.5 | 0.32          | 60 | 90 | 10 | 9.5 | 0.34          | 90 | 90 | 10 | 9.5 | 0.36          |
| 0 | 90 | 10 | 10  | 0.29          | 30 | 90 | 10 | 10  | 0.30          | 60 | 90 | 10 | 10  | 0.32          | 90 | 90 | 10 | 10  | 0.32          |
| 0 | 90 | 10 | 12  | 0.16          | 30 | 90 | 10 | 12  | 0.17          | 60 | 90 | 10 | 12  | 0.17          | 90 | 90 | 10 | 12  | 0.17          |
| 0 | 90 | 10 | 15  | 0.05          | 30 | 90 | 10 | 15  | 0.06          | 60 | 90 | 10 | 15  | 0.06          | 90 | 90 | 10 | 15  | 0.06          |
| 0 | 90 | 10 | 20  | 0.00          | 30 | 90 | 10 | 20  | 0.00          | 60 | 90 | 10 | 20  | 0.00          | 90 | 90 | 10 | 20  | 0.00          |
| 0 | 90 | 20 | 2.5 | 56316.88      | 30 | 90 | 20 | 2.5 | 51971.90      | 60 | 90 | 20 | 2.5 | 46748.66      | 90 | 90 | 20 | 2.5 | 47316.87      |
| 0 | 90 | 20 | 2.6 | 42645.30      | 30 | 90 | 20 | 2.6 | 41354.44      | 60 | 90 | 20 | 2.6 | 40862.65      | 90 | 90 | 20 | 2.6 | 42604.81      |
| 0 | 90 | 20 | 2.7 | 34962.46      | 30 | 90 | 20 | 2.7 | 35103.59      | 60 | 90 | 20 | 2.7 | 36670.49      | 90 | 90 | 20 | 2.7 | 38566.36      |
| 0 | 90 | 20 | 2.8 | 30254.36      | 30 | 90 | 20 | 2.8 | 30916.39      | 60 | 90 | 20 | 2.8 | 32955.31      | 90 | 90 | 20 | 2.8 | 34552.47      |
| 0 | 90 | 20 | 2.9 | 26652.63      | 30 | 90 | 20 | 2.9 | 27355.53      | 60 | 90 | 20 | 2.9 | 29137.80      | 90 | 90 | 20 | 2.9 | 30223.26      |
| 0 | 90 | 20 | 3   | 23253.20      | 30 | 90 | 20 | 3   | 23806.03      | 60 | 90 | 20 | 3   | 25045.32      | 90 | 90 | 20 | 3   | 25741.85      |
| 0 | 90 | 20 | 3.1 | 19738.43      | 30 | 90 | 20 | 3.1 | 20120.67      | 60 | 90 | 20 | 3.1 | 20933.10      | 90 | 90 | 20 | 3.1 | 21364.95      |
| 0 | 90 | 20 | 3.2 | 16288.18      | 30 | 90 | 20 | 3.2 | 16540.31      | 60 | 90 | 20 | 3.2 | 17061.21      | 90 | 90 | 20 | 3.2 | 17329.97      |
| 0 | 90 | 20 | 3.3 | 13106.64      | 30 | 90 | 20 | 3.3 | 13273.41      | 60 | 90 | 20 | 3.3 | 13612.60      | 90 | 90 | 20 | 3.3 | 13784.82      |
| 0 | 90 | 20 | 3.4 | 10327.12      | 30 | 90 | 20 | 3.4 | 10440.70      | 60 | 90 | 20 | 3.4 | 10669.71      | 90 | 90 | 20 | 3.4 | 10784.97      |
| 0 | 90 | 20 | 3.5 | 7995.94       | 30 | 90 | 20 | 3.5 | 8076.51       | 60 | 90 | 20 | 3.5 | 8238.09       | 90 | 90 | 20 | 3.5 | 8318.99       |
| 0 | 90 | 20 | 3.6 | 6099.09       | 30 | 90 | 20 | 3.6 | 6158.67       | 60 | 90 | 20 |     |               |    |    |    |     |               |

|   |    |    |     |          |    |    |    |     |          |    |    |    |     |          |    |    |    |       |          |
|---|----|----|-----|----------|----|----|----|-----|----------|----|----|----|-----|----------|----|----|----|-------|----------|
| 0 | 90 | 20 | 5.5 | -25.27   | 30 | 90 | 20 | 5.5 | -23.26   | 60 | 90 | 20 | 5.5 | -19.25   | 90 | 90 | 20 | 5.5   | -17.23   |
| 0 | 90 | 20 | 5.6 | -24.15   | 30 | 90 | 20 | 5.6 | -22.41   | 60 | 90 | 20 | 5.6 | -18.93   | 90 | 90 | 20 | 5.6   | -17.20   |
| 0 | 90 | 20 | 5.7 | -22.45   | 30 | 90 | 20 | 5.7 | -20.94   | 60 | 90 | 20 | 5.7 | -17.92   | 90 | 90 | 20 | 5.7   | -16.41   |
| 0 | 90 | 20 | 5.8 | -20.47   | 30 | 90 | 20 | 5.8 | -19.15   | 60 | 90 | 20 | 5.8 | -16.51   | 90 | 90 | 20 | 5.8   | -15.20   |
| 0 | 90 | 20 | 5.9 | -18.40   | 30 | 90 | 20 | 5.9 | -17.24   | 60 | 90 | 20 | 5.9 | -14.93   | 90 | 90 | 20 | 5.9   | -13.78   |
| 0 | 90 | 20 | 6   | -16.35   | 30 | 90 | 20 | 6   | -15.34   | 60 | 90 | 20 | 6   | -13.30   | 90 | 90 | 20 | 6     | -12.29   |
| 0 | 90 | 20 | 6.5 | -8.23    | 30 | 90 | 20 | 6.5 | -7.68    | 60 | 90 | 20 | 6.5 | -6.56    | 90 | 90 | 20 | 6.5   | -6.00    |
| 0 | 90 | 20 | 7   | -3.85    | 30 | 90 | 20 | 7   | -3.52    | 60 | 90 | 20 | 7   | -2.88    | 90 | 90 | 20 | 7     | -2.55    |
| 0 | 90 | 20 | 7.5 | -1.73    | 30 | 90 | 20 | 7.5 | -1.53    | 60 | 90 | 20 | 7.5 | -1.13    | 90 | 90 | 20 | 7.5   | -0.93    |
| 0 | 90 | 20 | 8   | -0.73    | 30 | 90 | 20 | 8   | -0.60    | 60 | 90 | 20 | 8   | -0.35    | 90 | 90 | 20 | 8     | -0.21    |
| 0 | 90 | 20 | 8.5 | -0.26    | 30 | 90 | 20 | 8.5 | -0.18    | 60 | 90 | 20 | 8.5 | -0.01    | 90 | 90 | 20 | 8.5   | 0.08     |
| 0 | 90 | 20 | 9   | -0.03    | 30 | 90 | 20 | 9   | 0.02     | 60 | 90 | 20 | 9   | 0.13     | 90 | 90 | 20 | 9     | 0.20     |
| 0 | 90 | 20 | 9.5 | 0.07     | 30 | 90 | 20 | 9.5 | 0.11     | 60 | 90 | 20 | 9.5 | 0.19     | 90 | 90 | 20 | 9.5   | 0.23     |
| 0 | 90 | 20 | 10  | 0.11     | 30 | 90 | 20 | 10  | 0.14     | 60 | 90 | 20 | 10  | 0.20     | 90 | 90 | 20 | 10    | 0.20     |
| 0 | 90 | 20 | 12  | 0.10     | 30 | 90 | 20 | 12  | 0.11     | 60 | 90 | 20 | 12  | 0.13     | 90 | 90 | 20 | 12    | 0.14     |
| 0 | 90 | 20 | 15  | 0.04     | 30 | 90 | 20 | 15  | 0.04     | 60 | 90 | 20 | 15  | 0.05     | 90 | 90 | 20 | 15    | 0.05     |
| 0 | 90 | 20 | 20  | 0.00     | 30 | 90 | 20 | 20  | 0.00     | 60 | 90 | 20 | 20  | 0.00     | 90 | 90 | 20 | 20    | 0.00     |
| 0 | 90 | 30 | 2.5 | 27967.23 | 30 | 90 | 30 | 2.5 | 27233.63 | 60 | 90 | 30 | 2.5 | 26554.21 | 90 | 90 | 30 | 2.5   | 26595.96 |
| 0 | 90 | 30 | 2.6 | 22653.90 | 30 | 90 | 30 | 2.6 | 22556.71 | 60 | 90 | 30 | 2.6 | 22791.70 | 90 | 90 | 30 | 2.6   | 23061.32 |
| 0 | 90 | 30 | 2.7 | 18721.17 | 30 | 90 | 30 | 2.7 | 18890.30 | 60 | 90 | 30 | 2.7 | 19442.28 | 90 | 90 | 30 | 2.7   | 19776.99 |
| 0 | 90 | 30 | 2.8 | 15625.44 | 30 | 90 | 30 | 2.8 | 15867.86 | 60 | 90 | 30 | 2.8 | 16422.58 | 90 | 90 | 30 | 2.8   | 16729.07 |
| 0 | 90 | 30 | 2.9 | 12972.89 | 30 | 90 | 30 | 2.9 | 13204.78 | 60 | 90 | 30 | 2.9 | 13688.90 | 90 | 90 | 30 | 2.9   | 13938.06 |
| 0 | 90 | 30 | 3   | 10658.68 | 30 | 90 | 30 | 3   | 10852.61 | 60 | 90 | 30 | 3   | 11240.81 | 90 | 90 | 30 | 3     | 11433.47 |
| 0 | 90 | 30 | 3.1 | 8633.69  | 30 | 90 | 30 | 3.1 | 8787.76  | 60 | 90 | 30 | 3.1 | 9089.75  | 90 | 90 | 30 | 3.1   | 9236.75  |
| 0 | 90 | 30 | 3.2 | 6884.94  | 30 | 90 | 30 | 3.2 | 7005.88  | 60 | 90 | 30 | 3.2 | 7240.50  | 90 | 90 | 30 | 3.2   | 7353.66  |
| 0 | 90 | 30 | 3.3 | 5404.34  | 30 | 90 | 30 | 3.3 | 5499.99  | 60 | 90 | 30 | 3.3 | 5684.78  | 90 | 90 | 30 | 3.3   | 5773.63  |
| 0 | 90 | 30 | 3.4 | 4176.81  | 30 | 90 | 30 | 3.4 | 4253.62  | 60 | 90 | 30 | 3.4 | 4402.04  | 90 | 90 | 30 | 3.4   | 4473.45  |
| 0 | 90 | 30 | 3.5 | 3179.16  | 30 | 90 | 30 | 3.5 | 3241.85  | 60 | 90 | 30 | 3.5 | 3363.33  | 90 | 90 | 30 | 3.5   | 3421.96  |
| 0 | 90 | 30 | 3.6 | 2382.82  | 30 | 90 | 30 | 3.6 | 2434.73  | 60 | 90 | 30 | 3.6 | 2535.79  | 90 | 90 | 30 | 3.6   | 2584.71  |
| 0 | 90 | 30 | 3.7 | 1757.54  | 30 | 90 | 30 | 3.7 | 1801.02  | 60 | 90 | 30 | 3.7 | 1886.08  | 90 | 90 | 30 | 3.7   | 1927.37  |
| 0 | 90 | 30 | 3.8 | 1273.94  | 30 | 90 | 30 | 3.8 | 1310.70  | 60 | 90 | 30 | 3.8 | 1382.87  | 90 | 90 | 30 | 3.8   | 1417.99  |
| 0 | 90 | 30 | 3.9 | 905.35   | 30 | 90 | 30 | 3.9 | 936.63   | 60 | 90 | 30 | 3.9 | 998.20   | 90 | 90 | 30 | 3.9   | 1028.20  |
| 0 | 90 | 30 | 4   | 628.51   | 30 | 90 | 30 | 4   | 655.23   | 60 | 90 | 30 | 4   | 707.92   | 90 | 90 | 30 | 4     | 733.63   |
| 0 | 90 | 30 | 4.1 | 423.71   | 30 | 90 | 30 | 4.1 | 446.56   | 60 | 90 | 30 | 4.1 | 491.69   | 90 | 90 | 30 | 4.1   | 513.77   |
| 0 | 90 | 30 | 4.2 | 274.51   | 30 | 90 | 30 | 4.2 | 294.06   | 60 | 90 | 30 | 4.2 | 332.71   | 90 | 90 | 30 | 4.2   | 351.67   |
| 0 | 90 | 30 | 4.3 | 167.51   | 30 | 90 | 30 | 4.3 | 184.23   | 60 | 90 | 30 | 4.3 | 217.32   | 90 | 90 | 30 | 4.3   | 233.61   |
| 0 | 90 | 30 | 4.4 | 92.01    | 30 | 90 | 30 | 4.4 | 106.33   | 60 | 90 | 30 | 4.4 | 134.67   | 90 | 90 | 30 | 4.4   | 148.69   |
| 0 | 90 | 30 | 4.5 | 39.77    | 30 | 90 | 30 | 4.5 | 52.04    | 60 | 90 | 30 | 4.5 | 76.37    | 90 | 90 | 30 | 4.5   | 88.44    |
| 0 | 90 | 30 | 4.6 | 4.53     | 30 | 90 | 30 | 4.6 | 15.08    | 60 | 90 | 30 | 4.6 | 36.02    | 90 | 90 | 30 | 4.6   | 46.42    |
| 0 | 90 | 30 | 4.7 | -18.35   | 30 | 90 | 30 | 4.7 | -9.24    | 60 | 90 | 30 | 4.7 | 8.84     | 90 | 90 | 30 | 4.7   | 17.82    |
| 0 | 90 | 30 | 4.8 | -32.31   | 30 | 90 | 30 | 4.8 | -24.44   | 60 | 90 | 30 | 4.8 | -8.78    | 90 | 90 | 30 | 4.8   | -1.01    |
| 0 | 90 | 30 | 4.9 | -39.96   | 30 | 90 | 30 | 4.9 | -33.13   | 60 | 90 | 30 | 4.9 | -19.55   | 90 | 90 | 30 | 4.9   | -12.81   |
| 0 | 90 | 30 | 5   | -43.23   | 30 | 90 | 30 | 5   | -37.31   | 60 | 90 | 30 | 5   | -25.51   | 90 | 90 | 30 | 5     | -19.66   |
| 0 | 90 | 30 | 5.1 | -43.59   | 30 | 90 | 30 | 5.1 | -38.45   | 60 | 90 | 30 | 5.1 | -28.19   | 90 | 90 | 30 | 5.1   | -23.12   |
| 0 | 90 | 30 | 5.2 | -42.10   | 30 | 90 | 30 | 5.2 | -37.63   | 60 | 90 | 30 | 5.2 | -28.72   | 90 | 90 | 30 | 5.2   | -24.29   |
| 0 | 90 | 30 | 5.3 | -39.53   | 30 | 90 | 30 | 5.3 | -35.64   | 60 | 90 | 30 | 5.3 | -27.89   | 90 | 90 | 30 | 5.3   | -24.05   |
| 0 | 90 | 30 | 5.4 | -36.39   | 30 | 90 | 30 | 5.4 | -33.01   | 60 | 90 | 30 | 5.4 | -26.26   | 90 | 90 | 30 | 5.4   | -22.91   |
| 0 | 90 | 30 | 5.5 | -33.04   | 30 | 90 | 30 | 5.5 | -30.09   | 60 | 90 | 30 | 5.5 | -24.19   | 90 | 90 | 30 | 5.5   | -21.27   |
| 0 | 90 | 30 | 5.6 | -29.69   | 30 | 90 | 30 | 5.6 | -27.11   | 60 | 90 | 30 | 5.6 | -21.96   | 90 | 90 | 30 | 5.6   | -19.39   |
| 0 | 90 | 30 | 5.7 | -26.49   | 30 | 90 | 30 | 5.7 | -24.23   | 60 | 90 | 30 | 5.7 | -19.70   | 90 | 90 | 30 | 5.7   | -17.45   |
| 0 | 90 | 30 | 5.8 | -23.51   | 30 | 90 | 30 | 5.8 | -21.52   | 60 | 90 | 30 | 5.8 | -17.53   | 90 | 90 | 30 | 5.8   | -15.55   |
| 0 | 90 | 30 | 5.9 | -20.78   | 30 | 90 | 30 | 5.9 | -19.02   | 60 | 90 | 30 | 5.9 | -15.50   | 90 | 90 | 30 | 5.9   | -13.74   |
| 0 | 90 | 30 | 6   | -18.32   | 30 | 90 | 30 | 6   | -16.75   | 60 | 90 | 30 | 6   | -13.63   | 90 | 90 | 30 | 6     | -12.08   |
| 0 | 90 | 30 | 6.5 | -9.53    | 30 | 90 | 30 | 6.5 | -8.64    | 60 | 90 | 30 | 6.5 | -6.86    | 90 | 90 | 30 | 6.5   | -5.97    |
| 0 | 90 | 30 | 7   | -4.94    | 30 | 90 | 30 | 7   | -4.41    | 60 | 90 | 30 | 7   | -3.34    | 90 | 90 | 30 | 7     | -2.81    |
| 0 | 90 | 30 | 7.5 | -2.63    | 30 | 90 | 30 | 7.5 | -2.29    | 60 | 90 | 30 | 7.5 | -1.62    | 90 | 90 | 30 | 7.5   | -1.28    |
| 0 | 90 | 30 | 8   | -1.43    | 30 | 90 | 30 | 8   | -1.21    | 60 | 90 | 30 | 8   | -0.77    | 90 | 90 | 30 | 8     | -0.53    |
| 0 | 90 | 30 | 8.5 | -0.79    | 30 | 90 | 30 | 8.5 | -0.64    | 60 | 90 | 30 | 8.5 | -0.35    | 90 | 90 | 30 | 8.5   | -0.20    |
| 0 | 90 | 30 | 9   | -0.44    | 30 | 90 | 30 | 9   | -0.34    | 60 | 90 | 30 | 9   | -0.13    | 90 | 90 | 30 | 9     | -0.03    |
| 0 | 90 | 30 | 9.5 | -0.24    | 30 | 90 | 30 | 9.5 | -0.17    | 60 | 90 | 30 | 9.5 | -0.02    | 90 | 90 | 30 | 9.5   | 0.05     |
| 0 | 90 | 30 | 10  | -0.12    | 30 | 90 | 30 | 10  | -0.07    | 60 | 90 | 30 | 10  | 0.03     | 90 | 90 | 30 | 10    | 0.08     |
| 0 | 90 | 30 | 12  | 0.02     | 30 | 90 | 30 | 12  | 0.03     | 60 | 90 | 30 | 12  | 0.06     | 90 | 90 | 30 | 12    | 0.08     |
| 0 | 90 | 30 | 15  | 0.02     | 30 | 90 | 30 | 15  | 0.02     | 60 | 90 | 30 | 15  | 0.03     | 90 | 90 | 30 | 15    | 0.03     |
| 0 | 90 | 30 | 20  | 0.00     | 30 | 90 | 30 | 20  | 0.00     | 60 | 90 | 30 | 20  | 0.00     | 90 | 90 | 30 | 20    | 0.00     |
| 0 | 90 | 40 | 2.5 | 14689.66 | 30 | 90 | 40 | 2.5 | 14537.11 | 60 | 90 | 40 | 2.5 | 14286.60 | 90 | 90 | 40 | 2.5   | 14179.48 |
| 0 | 90 | 40 | 2.6 | 11601.53 | 30 | 90 | 40 | 2.6 | 11562.39 | 60 | 90 | 40 | 2.6 | 11494.45 | 90 | 90 | 40 | 2.6   | 11462.05 |
| 0 | 90 | 40 | 2.7 | 9152.53  | 30 | 90 | 40 | 2.7 | 9170.34  | 60 | 90 | 40 | 2.7 | 9198.16  | 90 | 90 | 40 | 2.7   | 9206.89  |
| 0 | 90 | 40 | 2.8 | 7192.02  | 30 | 90 | 40 | 2.8 | 7235.77  | 60 | 90 | 40 | 2.8 | 7310.16  | 90 | 90 | 40 | 2.8   | 7340.29  |
| 0 | 90 | 40 | 2.9 | 5614.05  | 30 | 90 | 40 | 2.9 | 5667.72  | 60 | 90 | 40 | 2.9 | 5762.04  | 90 | 90 | 40 | 2.9   | 5802.37  |
| 0 | 90 | 40 | 3   | 4343.01  | 30 | 90 | 40 | 3   | 4398.75  | 60 | 90 | 40 | 3   | 4499.15  | 90 | 90 | 40 | 3     | 4543.41  |
| 0 | 90 | 40 | 3.1 | 3322.72  | 30 | 90 | 40 | 3.1 | 3376.93  | 60 | 90 | 40 | 3.1 | 3476.28  | 90 | 90 | 40 | 3.1   | 3521.04  |
| 0 | 90 | 40 | 3.2 | 2509.31  | 30 | 90 | 40 | 3.2 | 2560.41  | 60 | 90 | 40 | 3.2 | 2655.16  | 90 | 90 | 40 | 3.2   | 2698.57  |
| 0 | 90 | 40 | 3.3 | 1866.81  | 30 | 90 | 40 | 3.3 | 1914.14  | 60 | 90 | 40 | 3.3 | 2002.57  | 90 | 90 | 40 | 3.3   | 2043.66  |
| 0 | 90 | 40 | 3.4 | 1364.83  | 30 | 90 | 40 | 3.4 | 1408.07  | 60 | 90 | 40 | 3.4 | 1489.38  | 90 | 90 | 40 | 3.4   | 1527.65  |
| 0 | 90 | 40 | 3.5 | 977.24   | 30 | 90 | 40 | 3.5 | 1016.21  | 60 | 90 | 40 | 3.5 | 1090.13  | 90 | 90 | 40 | 3.5   | 1125.33  |
| 0 | 90 | 40 | 3.6 | 681.55   | 30 | 90 | 40 | 3.6 | 716.32   | 60 | 90 | 40 | 3.6 | 782.92   | 90 | 90 | 40 | 3.6   | 814.96   |
| 0 | 90 | 40 | 3.7 | 458.78   | 30 | 90 | 40 | 3.7 | 489.65   | 60 | 90 | 40 | 3.7 | 549.27   | 90 | 90 | 40 | 3.7</ |          |



|   |    |    |     |                |    |    |    |     |                |    |    |    |     |               |    |    |    |     |               |
|---|----|----|-----|----------------|----|----|----|-----|----------------|----|----|----|-----|---------------|----|----|----|-----|---------------|
| 0 | 90 | 40 | 5.6 | -29.37         | 30 | 90 | 40 | 5.6 | -26.66         | 60 | 90 | 40 | 5.6 | -21.28        | 90 | 90 | 40 | 5.6 | -18.60        |
| 0 | 90 | 40 | 5.7 | -26.03         | 30 | 90 | 40 | 5.7 | -23.62         | 60 | 90 | 40 | 5.7 | -18.83        | 90 | 90 | 40 | 5.7 | -16.45        |
| 0 | 90 | 40 | 5.8 | -23.04         | 30 | 90 | 40 | 5.8 | -20.90         | 60 | 90 | 40 | 5.8 | -16.63        | 90 | 90 | 40 | 5.8 | -14.50        |
| 0 | 90 | 40 | 5.9 | -20.40         | 30 | 90 | 40 | 5.9 | -18.48         | 60 | 90 | 40 | 5.9 | -14.66        | 90 | 90 | 40 | 5.9 | -12.75        |
| 0 | 90 | 40 | 6   | -18.06         | 30 | 90 | 40 | 6   | -16.34         | 60 | 90 | 40 | 6   | -12.91        | 90 | 90 | 40 | 6   | -11.20        |
| 0 | 90 | 40 | 6.5 | -9.92          | 30 | 90 | 40 | 6.5 | -8.89          | 60 | 90 | 40 | 6.5 | -6.83         | 90 | 90 | 40 | 6.5 | -5.81         |
| 0 | 90 | 40 | 7   | -5.61          | 30 | 90 | 40 | 7   | -4.97          | 60 | 90 | 40 | 7   | -3.68         | 90 | 90 | 40 | 7   | -3.04         |
| 0 | 90 | 40 | 7.5 | -3.30          | 30 | 90 | 40 | 7.5 | -2.88          | 60 | 90 | 40 | 7.5 | -2.05         | 90 | 90 | 40 | 7.5 | -1.63         |
| 0 | 90 | 40 | 8   | -2.01          | 30 | 90 | 40 | 8   | -1.73          | 60 | 90 | 40 | 8   | -1.17         | 90 | 90 | 40 | 8   | -0.88         |
| 0 | 90 | 40 | 8.5 | -1.26          | 30 | 90 | 40 | 8.5 | -1.07          | 60 | 90 | 40 | 8.5 | -0.68         | 90 | 90 | 40 | 8.5 | -0.48         |
| 0 | 90 | 40 | 9   | -0.81          | 30 | 90 | 40 | 9   | -0.67          | 60 | 90 | 40 | 9   | -0.40         | 90 | 90 | 40 | 9   | -0.26         |
| 0 | 90 | 40 | 9.5 | -0.53          | 30 | 90 | 40 | 9.5 | -0.43          | 60 | 90 | 40 | 9.5 | -0.23         | 90 | 90 | 40 | 9.5 | -0.15         |
| 0 | 90 | 40 | 10  | -0.36          | 30 | 90 | 40 | 10  | -0.28          | 60 | 90 | 40 | 10  | -0.14         | 90 | 90 | 40 | 10  | -0.08         |
| 0 | 90 | 40 | 12  | -0.08          | 30 | 90 | 40 | 12  | -0.05          | 60 | 90 | 40 | 12  | -0.01         | 90 | 90 | 40 | 12  | 0.02          |
| 0 | 90 | 40 | 15  | -0.01          | 30 | 90 | 40 | 15  | 0.00           | 60 | 90 | 40 | 15  | 0.01          | 90 | 90 | 40 | 15  | 0.02          |
| 0 | 90 | 40 | 20  | 0.00           | 30 | 90 | 40 | 20  | 0.00           | 60 | 90 | 40 | 20  | 0.00          | 90 | 90 | 40 | 20  | 0.00          |
| 0 | 90 | 50 | 2.5 | 7299.35        | 30 | 90 | 50 | 2.5 | 7205.68        | 60 | 90 | 50 | 2.5 | 7013.93       | 90 | 90 | 50 | 2.5 | 6915.71       |
| 0 | 90 | 50 | 2.6 | 5487.83        | 30 | 90 | 50 | 2.6 | 5440.45        | 60 | 90 | 50 | 2.6 | 5337.32       | 90 | 90 | 50 | 2.6 | 5281.92       |
| 0 | 90 | 50 | 2.7 | 4093.99        | 30 | 90 | 50 | 2.7 | 4076.48        | 60 | 90 | 50 | 2.7 | 4032.38       | 90 | 90 | 50 | 2.7 | 4006.31       |
| 0 | 90 | 50 | 2.8 | 3024.85        | 30 | 90 | 50 | 2.8 | 3026.26        | 60 | 90 | 50 | 2.8 | 3020.72       | 90 | 90 | 50 | 2.8 | 3014.31       |
| 0 | 90 | 50 | 2.9 | 2207.72        | 30 | 90 | 50 | 2.9 | 2220.76        | 60 | 90 | 50 | 2.9 | 2239.79       | 90 | 90 | 50 | 2.9 | 2246.19       |
| 0 | 90 | 50 | 3   | 1586.06        | 30 | 90 | 50 | 3   | 1606.00        | 60 | 90 | 50 | 3   | 1640.07       | 90 | 90 | 50 | 3   | 1654.50       |
| 0 | 90 | 50 | 3.1 | 1116.15        | 30 | 90 | 50 | 3.1 | 1139.84        | 60 | 90 | 50 | 3.1 | 1182.41       | 90 | 90 | 50 | 3.1 | 1201.54       |
| 0 | 90 | 50 | 3.2 | 763.99         | 30 | 90 | 50 | 3.2 | 789.31         | 60 | 90 | 50 | 3.2 | 835.94        | 90 | 90 | 50 | 3.2 | 857.50        |
| 0 | 90 | 50 | 3.3 | 503.03         | 30 | 90 | 50 | 3.3 | 528.53         | 60 | 90 | 50 | 3.3 | 576.20        | 90 | 90 | 50 | 3.3 | 598.59        |
| 0 | 90 | 50 | 3.4 | 312.25         | 30 | 90 | 50 | 3.4 | 336.94         | 60 | 90 | 50 | 3.4 | 383.58        | 90 | 90 | 50 | 3.4 | 405.71        |
| 0 | 90 | 50 | 3.5 | 174.91         | 30 | 90 | 50 | 3.5 | 198.13         | 60 | 90 | 50 | 3.5 | 242.37        | 90 | 90 | 50 | 3.5 | 263.53        |
| 0 | 90 | 50 | 3.6 | 77.72          | 30 | 90 | 50 | 3.6 | 99.11          | 60 | 90 | 50 | 3.6 | 140.22        | 90 | 90 | 50 | 3.6 | 160.01        |
| 0 | 90 | 50 | 3.7 | 10.39          | 30 | 90 | 50 | 3.7 | 29.86          | 60 | 90 | 50 | 3.7 | 67.55         | 90 | 90 | 50 | 3.7 | 85.78         |
| 0 | 90 | 50 | 3.8 | -34.82         | 30 | 90 | 50 | 3.8 | -17.21         | 60 | 90 | 50 | 3.8 | 17.06         | 90 | 90 | 50 | 3.8 | 33.69         |
| 0 | 90 | 50 | 3.9 | -63.73         | 30 | 90 | 50 | 3.9 | -47.87         | 60 | 90 | 50 | 3.9 | -16.90        | 90 | 90 | 50 | 3.9 | -1.83         |
| 0 | 90 | 50 | 4   | -80.76         | 30 | 90 | 50 | 4   | -66.52         | 60 | 90 | 50 | 4   | -38.67        | 90 | 90 | 50 | 4   | -25.09        |
| 0 | 90 | 50 | 4.1 | -89.30         | 30 | 90 | 50 | 4.1 | -76.57         | 60 | 90 | 50 | 4.1 | -51.65        | 90 | 90 | 50 | 4.1 | -39.45        |
| 0 | 90 | 50 | 4.2 | <b>-91.98</b>  | 30 | 90 | 50 | 4.2 | -80.64         | 60 | 90 | 50 | 4.2 | -58.39        | 90 | 90 | 50 | 4.2 | -47.47        |
| 0 | 90 | 50 | 4.3 | -90.74         | 30 | 90 | 50 | 4.3 | <b>-80.67</b>  | 60 | 90 | 50 | 4.3 | <b>-60.82</b> | 90 | 90 | 50 | 4.3 | -51.06        |
| 0 | 90 | 50 | 4.4 | -87.01         | 30 | 90 | 50 | 4.4 | -78.05         | 60 | 90 | 50 | 4.4 | -60.36        | 90 | 90 | 50 | 4.4 | <b>-51.64</b> |
| 0 | 90 | 50 | 4.5 | -81.78         | 30 | 90 | 50 | 4.5 | -73.81         | 60 | 90 | 50 | 4.5 | -58.05        | 90 | 90 | 50 | 4.5 | -50.26        |
| 0 | 90 | 50 | 4.6 | -75.75         | 30 | 90 | 50 | 4.6 | -68.66         | 60 | 90 | 50 | 4.6 | -54.60        | 90 | 90 | 50 | 4.6 | -47.65        |
| 0 | 90 | 50 | 4.7 | -69.41         | 30 | 90 | 50 | 4.7 | -63.09         | 60 | 90 | 50 | 4.7 | -50.55        | 90 | 90 | 50 | 4.7 | -44.34        |
| 0 | 90 | 50 | 4.8 | -63.09         | 30 | 90 | 50 | 4.8 | -57.45         | 60 | 90 | 50 | 4.8 | -46.25        | 90 | 90 | 50 | 4.8 | -40.71        |
| 0 | 90 | 50 | 4.9 | -56.98         | 30 | 90 | 50 | 4.9 | -51.95         | 60 | 90 | 50 | 4.9 | -41.94        | 90 | 90 | 50 | 4.9 | -36.99        |
| 0 | 90 | 50 | 5   | -51.23         | 30 | 90 | 50 | 5   | -46.73         | 60 | 90 | 50 | 5   | -37.78        | 90 | 90 | 50 | 5   | -33.35        |
| 0 | 90 | 50 | 5.1 | -45.89         | 30 | 90 | 50 | 5.1 | -41.87         | 60 | 90 | 50 | 5.1 | -33.86        | 90 | 90 | 50 | 5.1 | -29.89        |
| 0 | 90 | 50 | 5.2 | -41.01         | 30 | 90 | 50 | 5.2 | -37.41         | 60 | 90 | 50 | 5.2 | -30.23        | 90 | 90 | 50 | 5.2 | -26.67        |
| 0 | 90 | 50 | 5.3 | -36.59         | 30 | 90 | 50 | 5.3 | -33.35         | 60 | 90 | 50 | 5.3 | -26.92        | 90 | 90 | 50 | 5.3 | -23.73        |
| 0 | 90 | 50 | 5.4 | -32.61         | 30 | 90 | 50 | 5.4 | -29.71         | 60 | 90 | 50 | 5.4 | -23.92        | 90 | 90 | 50 | 5.4 | -21.05        |
| 0 | 90 | 50 | 5.5 | -29.05         | 30 | 90 | 50 | 5.5 | -26.44         | 60 | 90 | 50 | 5.5 | -21.24        | 90 | 90 | 50 | 5.5 | -18.66        |
| 0 | 90 | 50 | 5.6 | -25.89         | 30 | 90 | 50 | 5.6 | -23.53         | 60 | 90 | 50 | 5.6 | -18.84        | 90 | 90 | 50 | 5.6 | -16.51        |
| 0 | 90 | 50 | 5.7 | -23.08         | 30 | 90 | 50 | 5.7 | -20.95         | 60 | 90 | 50 | 5.7 | -16.72        | 90 | 90 | 50 | 5.7 | -14.61        |
| 0 | 90 | 50 | 5.8 | -20.59         | 30 | 90 | 50 | 5.8 | -18.67         | 60 | 90 | 50 | 5.8 | -14.84        | 90 | 90 | 50 | 5.8 | -12.93        |
| 0 | 90 | 50 | 5.9 | -18.39         | 30 | 90 | 50 | 5.9 | -16.64         | 60 | 90 | 50 | 5.9 | -13.18        | 90 | 90 | 50 | 5.9 | -11.45        |
| 0 | 90 | 50 | 6   | -16.44         | 30 | 90 | 50 | 6   | -14.86         | 60 | 90 | 50 | 6   | -11.71        | 90 | 90 | 50 | 6   | -10.14        |
| 0 | 90 | 50 | 6.5 | -9.59          | 30 | 90 | 50 | 6.5 | -8.59          | 60 | 90 | 50 | 6.5 | -6.61         | 90 | 90 | 50 | 6.5 | -5.62         |
| 0 | 90 | 50 | 7   | -5.81          | 30 | 90 | 50 | 7   | -5.16          | 60 | 90 | 50 | 7   | -3.87         | 90 | 90 | 50 | 7   | -3.22         |
| 0 | 90 | 50 | 7.5 | -3.66          | 30 | 90 | 50 | 7.5 | -3.22          | 60 | 90 | 50 | 7.5 | -2.35         | 90 | 90 | 50 | 7.5 | -1.92         |
| 0 | 90 | 50 | 8   | -2.38          | 30 | 90 | 50 | 8   | -2.08          | 60 | 90 | 50 | 8   | -1.47         | 90 | 90 | 50 | 8   | -1.17         |
| 0 | 90 | 50 | 8.5 | -1.60          | 30 | 90 | 50 | 8.5 | -1.38          | 60 | 90 | 50 | 8.5 | -0.95         | 90 | 90 | 50 | 8.5 | -0.74         |
| 0 | 90 | 50 | 9   | -1.09          | 30 | 90 | 50 | 9   | -0.94          | 60 | 90 | 50 | 9   | -0.63         | 90 | 90 | 50 | 9   | -0.48         |
| 0 | 90 | 50 | 9.5 | -0.77          | 30 | 90 | 50 | 9.5 | -0.65          | 60 | 90 | 50 | 9.5 | -0.42         | 90 | 90 | 50 | 9.5 | -0.28         |
| 0 | 90 | 50 | 10  | -0.55          | 30 | 90 | 50 | 10  | -0.46          | 60 | 90 | 50 | 10  | -0.29         | 90 | 90 | 50 | 10  | -0.23         |
| 0 | 90 | 50 | 12  | -0.16          | 30 | 90 | 50 | 12  | -0.13          | 60 | 90 | 50 | 12  | -0.07         | 90 | 90 | 50 | 12  | -0.04         |
| 0 | 90 | 50 | 15  | -0.03          | 30 | 90 | 50 | 15  | -0.02          | 60 | 90 | 50 | 15  | -0.01         | 90 | 90 | 50 | 15  | 0.00          |
| 0 | 90 | 50 | 20  | 0.00           | 30 | 90 | 50 | 20  | 0.00           | 60 | 90 | 50 | 20  | 0.00          | 90 | 90 | 50 | 20  | 0.00          |
| 0 | 90 | 60 | 2.5 | 3309.09        | 30 | 90 | 60 | 2.5 | 3273.08        | 60 | 90 | 60 | 2.5 | 3200.05       | 90 | 90 | 60 | 2.5 | 3162.75       |
| 0 | 90 | 60 | 2.6 | 2353.42        | 30 | 90 | 60 | 2.6 | 2337.19        | 60 | 90 | 60 | 2.6 | 2302.46       | 90 | 90 | 60 | 2.6 | 2283.94       |
| 0 | 90 | 60 | 2.7 | 1642.70        | 30 | 90 | 60 | 2.7 | 1639.62        | 60 | 90 | 60 | 2.7 | 1630.71       | 90 | 90 | 60 | 2.7 | 1625.08       |
| 0 | 90 | 60 | 2.8 | 1118.54        | 30 | 90 | 60 | 2.8 | 1123.94        | 60 | 90 | 60 | 2.8 | 1132.05       | 90 | 90 | 60 | 2.8 | 1135.00       |
| 0 | 90 | 60 | 2.9 | 735.42         | 30 | 90 | 60 | 2.9 | 746.11         | 60 | 90 | 60 | 2.9 | 765.12        | 90 | 90 | 60 | 2.9 | 773.60        |
| 0 | 90 | 60 | 3   | 458.28         | 30 | 90 | 60 | 3   | 472.14         | 60 | 90 | 60 | 3   | 497.81        | 90 | 90 | 60 | 3   | 509.68        |
| 0 | 90 | 60 | 3.1 | 260.45         | 30 | 90 | 60 | 3.1 | 276.02         | 60 | 90 | 60 | 3.1 | 305.40        | 90 | 90 | 60 | 3.1 | 319.20        |
| 0 | 90 | 60 | 3.2 | 121.75         | 30 | 90 | 60 | 3.2 | 138.00         | 60 | 90 | 60 | 3.2 | 168.97        | 90 | 90 | 60 | 3.2 | 183.64        |
| 0 | 90 | 60 | 3.3 | 26.86          | 30 | 90 | 60 | 3.3 | 43.05          | 60 | 90 | 60 | 3.3 | 74.06         | 90 | 90 | 60 | 3.3 | 88.83         |
| 0 | 90 | 60 | 3.4 | -35.93         | 30 | 90 | 60 | 3.4 | -20.36         | 60 | 90 | 60 | 3.4 | 9.60          | 90 | 90 | 60 | 3.4 | 23.96         |
| 0 | 90 | 60 | 3.5 | -75.65         | 30 | 90 | 60 | 3.5 | -61.02         | 60 | 90 | 60 | 3.5 | -32.79        | 90 | 90 | 60 | 3.5 | -19.18        |
| 0 | 90 | 60 | 3.6 | -99.08         | 30 | 90 | 60 | 3.6 | -85.56         | 60 | 90 | 60 | 3.6 | -59.36        | 90 | 90 | 60 | 3.6 | -46.66        |
| 0 | 90 | 60 | 3.7 | -111.21        | 30 | 90 | 60 | 3.7 | -98.83         | 60 | 90 | 60 | 3.7 | -74.70        | 90 | 90 | 60 | 3.7 | -62.95        |
| 0 | 90 | 60 | 3.8 | <b>-115.58</b> | 30 | 90 | 60 | 3.8 | -104.28        | 60 | 90 | 60 | 3.8 | -82.17        | 90 | 90 | 60 | 3.8 | -71.36        |
| 0 | 90 | 60 | 3.9 | -114.73        | 30 | 90 | 60 | 3.9 | <b>-104.44</b> | 60 | 90 |    |     |               |    |    |    |     |               |

|   |    |    |     |                |    |    |    |     |                |    |    |    |     |                |    |    |    |     |                |
|---|----|----|-----|----------------|----|----|----|-----|----------------|----|----|----|-----|----------------|----|----|----|-----|----------------|
| 0 | 90 | 60 | 5.7 | -19.90         | 30 | 90 | 60 | 5.7 | -18.15         | 60 | 90 | 60 | 5.7 | -14.69         | 90 | 90 | 60 | 5.7 | -12.96         |
| 0 | 90 | 60 | 5.8 | -17.91         | 30 | 90 | 60 | 5.8 | -16.32         | 60 | 90 | 60 | 5.8 | -13.15         | 90 | 90 | 60 | 5.8 | -11.58         |
| 0 | 90 | 60 | 5.9 | -16.16         | 30 | 90 | 60 | 5.9 | -14.70         | 60 | 90 | 60 | 5.9 | -11.79         | 90 | 90 | 60 | 5.9 | -10.35         |
| 0 | 90 | 60 | 6   | -14.59         | 30 | 90 | 60 | 6   | -13.25         | 60 | 90 | 60 | 6   | -10.59         | 90 | 90 | 60 | 6   | -9.26          |
| 0 | 90 | 60 | 6.5 | -8.98          | 30 | 90 | 60 | 6.5 | -8.09          | 60 | 90 | 60 | 6.5 | -6.33          | 90 | 90 | 60 | 6.5 | -5.46          |
| 0 | 90 | 60 | 7   | -5.73          | 30 | 90 | 60 | 7   | -5.14          | 60 | 90 | 60 | 7   | -3.94          | 90 | 90 | 60 | 7   | -3.35          |
| 0 | 90 | 60 | 7.5 | -3.79          | 30 | 90 | 60 | 7.5 | -3.37          | 60 | 90 | 60 | 7.5 | -2.54          | 90 | 90 | 60 | 7.5 | -2.13          |
| 0 | 90 | 60 | 8   | -2.58          | 30 | 90 | 60 | 8   | -2.28          | 60 | 90 | 60 | 8   | -1.68          | 90 | 90 | 60 | 8   | -1.38          |
| 0 | 90 | 60 | 8.5 | -1.80          | 30 | 90 | 60 | 8.5 | -1.58          | 60 | 90 | 60 | 8.5 | -1.15          | 90 | 90 | 60 | 8.5 | -0.93          |
| 0 | 90 | 60 | 9   | -1.28          | 30 | 90 | 60 | 9   | -1.11          | 60 | 90 | 60 | 9   | -0.80          | 90 | 90 | 60 | 9   | -0.64          |
| 0 | 90 | 60 | 9.5 | -0.93          | 30 | 90 | 60 | 9.5 | -0.81          | 60 | 90 | 60 | 9.5 | -0.57          | 90 | 90 | 60 | 9.5 | -0.44          |
| 0 | 90 | 60 | 10  | -0.68          | 30 | 90 | 60 | 10  | -0.59          | 60 | 90 | 60 | 10  | -0.41          | 90 | 90 | 60 | 10  | -0.33          |
| 0 | 90 | 60 | 12  | -0.23          | 30 | 90 | 60 | 12  | -0.19          | 60 | 90 | 60 | 12  | -0.13          | 90 | 90 | 60 | 12  | -0.09          |
| 0 | 90 | 60 | 15  | -0.05          | 30 | 90 | 60 | 15  | -0.04          | 60 | 90 | 60 | 15  | -0.02          | 90 | 90 | 60 | 15  | -0.02          |
| 0 | 90 | 60 | 20  | 0.00           | 30 | 90 | 60 | 20  | 0.00           | 60 | 90 | 60 | 20  | 0.00           | 90 | 90 | 60 | 20  | 0.00           |
| 0 | 90 | 70 | 2.5 | 1351.26        | 30 | 90 | 70 | 2.5 | 1354.71        | 60 | 90 | 70 | 2.5 | 1360.49        | 90 | 90 | 70 | 2.5 | 1363.04        |
| 0 | 90 | 70 | 2.6 | 865.80         | 30 | 90 | 70 | 2.6 | 874.43         | 60 | 90 | 70 | 2.6 | 890.21         | 90 | 90 | 70 | 2.6 | 897.55         |
| 0 | 90 | 70 | 2.7 | 520.96         | 30 | 90 | 70 | 2.7 | 532.66         | 60 | 90 | 70 | 2.7 | 554.40         | 90 | 90 | 70 | 2.7 | 564.53         |
| 0 | 90 | 70 | 2.8 | 279.82         | 30 | 90 | 70 | 2.8 | 293.17         | 60 | 90 | 70 | 2.8 | 318.26         | 90 | 90 | 70 | 2.8 | 329.95         |
| 0 | 90 | 70 | 2.9 | 114.49         | 30 | 90 | 70 | 2.9 | 128.55         | 60 | 90 | 70 | 2.9 | 155.28         | 90 | 90 | 70 | 2.9 | 167.78         |
| 0 | 90 | 70 | 3   | 4.05           | 30 | 90 | 70 | 3   | 18.20          | 60 | 90 | 70 | 3   | 45.35          | 90 | 90 | 70 | 3   | 58.17          |
| 0 | 90 | 70 | 3.1 | -67.03         | 30 | 90 | 70 | 3.1 | -53.21         | 60 | 90 | 70 | 3.1 | -26.55         | 90 | 90 | 70 | 3.1 | -13.82         |
| 0 | 90 | 70 | 3.2 | -110.21        | 30 | 90 | 70 | 3.2 | -97.04         | 60 | 90 | 70 | 3.2 | -71.55         | 90 | 90 | 70 | 3.2 | -59.26         |
| 0 | 90 | 70 | 3.3 | -133.97        | 30 | 90 | 70 | 3.3 | -121.64        | 60 | 90 | 70 | 3.3 | -97.74         | 90 | 90 | 70 | 3.3 | -86.13         |
| 0 | 90 | 70 | 3.4 | -144.49        | 30 | 90 | 70 | 3.4 | -133.10        | 60 | 90 | 70 | 3.4 | -110.99        | 90 | 90 | 70 | 3.4 | -100.19        |
| 0 | 90 | 70 | 3.5 | <b>-146.25</b> | 30 | 90 | 70 | 3.5 | <b>-135.84</b> | 60 | 90 | 70 | 3.5 | <b>-115.51</b> | 90 | 90 | 70 | 3.5 | <b>-105.55</b> |
| 0 | 90 | 70 | 3.6 | -142.44        | 30 | 90 | 70 | 3.6 | -132.93        | 60 | 90 | 70 | 3.6 | -114.30        | 90 | 90 | 70 | 3.6 | -105.16        |
| 0 | 90 | 70 | 3.7 | -135.24        | 30 | 90 | 70 | 3.7 | -126.57        | 60 | 90 | 70 | 3.7 | -109.52        | 90 | 90 | 70 | 3.7 | -101.14        |
| 0 | 90 | 70 | 3.8 | -126.13        | 30 | 90 | 70 | 3.8 | -118.24        | 60 | 90 | 70 | 3.8 | -102.67        | 90 | 90 | 70 | 3.8 | -95.00         |
| 0 | 90 | 70 | 3.9 | -116.16        | 30 | 90 | 70 | 3.9 | -108.98        | 60 | 90 | 70 | 3.9 | -94.76         | 90 | 90 | 70 | 3.9 | -87.75         |
| 0 | 90 | 70 | 4   | -106.00        | 30 | 90 | 70 | 4   | -99.45         | 60 | 90 | 70 | 4   | -86.50         | 90 | 90 | 70 | 4   | -80.11         |
| 0 | 90 | 70 | 4.1 | -96.07         | 30 | 90 | 70 | 4.1 | -90.12         | 60 | 90 | 70 | 4.1 | -78.32         | 90 | 90 | 70 | 4.1 | -72.50         |
| 0 | 90 | 70 | 4.2 | -86.66         | 30 | 90 | 70 | 4.2 | -81.25         | 60 | 90 | 70 | 4.2 | -70.51         | 90 | 90 | 70 | 4.2 | -65.20         |
| 0 | 90 | 70 | 4.3 | -77.91         | 30 | 90 | 70 | 4.3 | -72.99         | 60 | 90 | 70 | 4.3 | -63.22         | 90 | 90 | 70 | 4.3 | -58.38         |
| 0 | 90 | 70 | 4.4 | -69.89         | 30 | 90 | 70 | 4.4 | -65.41         | 60 | 90 | 70 | 4.4 | -56.51         | 90 | 90 | 70 | 4.4 | -52.11         |
| 0 | 90 | 70 | 4.5 | -62.60         | 30 | 90 | 70 | 4.5 | -58.53         | 60 | 90 | 70 | 4.5 | -50.43         | 90 | 90 | 70 | 4.5 | -46.42         |
| 0 | 90 | 70 | 4.6 | -56.04         | 30 | 90 | 70 | 4.6 | -52.33         | 60 | 90 | 70 | 4.6 | -44.95         | 90 | 90 | 70 | 4.6 | -41.30         |
| 0 | 90 | 70 | 4.7 | -50.16         | 30 | 90 | 70 | 4.7 | -46.78         | 60 | 90 | 70 | 4.7 | -40.05         | 90 | 90 | 70 | 4.7 | -36.72         |
| 0 | 90 | 70 | 4.8 | -44.92         | 30 | 90 | 70 | 4.8 | -41.83         | 60 | 90 | 70 | 4.8 | -35.69         | 90 | 90 | 70 | 4.8 | -32.64         |
| 0 | 90 | 70 | 4.9 | -40.24         | 30 | 90 | 70 | 4.9 | -37.42         | 60 | 90 | 70 | 4.9 | -31.82         | 90 | 90 | 70 | 4.9 | -29.03         |
| 0 | 90 | 70 | 5   | -36.09         | 30 | 90 | 70 | 5   | -33.51         | 60 | 90 | 70 | 5   | -28.39         | 90 | 90 | 70 | 5   | -25.84         |
| 0 | 90 | 70 | 5.1 | -32.41         | 30 | 90 | 70 | 5.1 | -30.05         | 60 | 90 | 70 | 5.1 | -25.35         | 90 | 90 | 70 | 5.1 | -23.02         |
| 0 | 90 | 70 | 5.2 | -29.14         | 30 | 90 | 70 | 5.2 | -26.97         | 60 | 90 | 70 | 5.2 | -22.67         | 90 | 90 | 70 | 5.2 | -20.53         |
| 0 | 90 | 70 | 5.3 | -26.23         | 30 | 90 | 70 | 5.3 | -24.25         | 60 | 90 | 70 | 5.3 | -20.30         | 90 | 90 | 70 | 5.3 | -18.33         |
| 0 | 90 | 70 | 5.4 | -23.65         | 30 | 90 | 70 | 5.4 | -21.83         | 60 | 90 | 70 | 5.4 | -18.20         | 90 | 90 | 70 | 5.4 | -16.39         |
| 0 | 90 | 70 | 5.5 | -21.36         | 30 | 90 | 70 | 5.5 | -19.68         | 60 | 90 | 70 | 5.5 | -16.35         | 90 | 90 | 70 | 5.5 | -14.69         |
| 0 | 90 | 70 | 5.6 | -19.32         | 30 | 90 | 70 | 5.6 | -17.78         | 60 | 90 | 70 | 5.6 | -14.70         | 90 | 90 | 70 | 5.6 | -13.18         |
| 0 | 90 | 70 | 5.7 | -17.51         | 30 | 90 | 70 | 5.7 | -16.08         | 60 | 90 | 70 | 5.7 | -13.25         | 90 | 90 | 70 | 5.7 | -11.84         |
| 0 | 90 | 70 | 5.8 | -15.89         | 30 | 90 | 70 | 5.8 | -14.57         | 60 | 90 | 70 | 5.8 | -11.96         | 90 | 90 | 70 | 5.8 | -10.66         |
| 0 | 90 | 70 | 5.9 | -14.44         | 30 | 90 | 70 | 5.9 | -13.23         | 60 | 90 | 70 | 5.9 | -10.81         | 90 | 90 | 70 | 5.9 | -9.61          |
| 0 | 90 | 70 | 6   | -13.15         | 30 | 90 | 70 | 6   | -12.03         | 60 | 90 | 70 | 6   | -9.79          | 90 | 90 | 70 | 6   | -8.68          |
| 0 | 90 | 70 | 6.5 | -8.41          | 30 | 90 | 70 | 6.5 | -7.64          | 60 | 90 | 70 | 6.5 | -6.11          | 90 | 90 | 70 | 6.5 | -5.35          |
| 0 | 90 | 70 | 7   | -5.57          | 30 | 90 | 70 | 7   | -5.03          | 60 | 90 | 70 | 7   | -3.96          | 90 | 90 | 70 | 7   | -3.44          |
| 0 | 90 | 70 | 7.5 | -3.80          | 30 | 90 | 70 | 7.5 | -3.42          | 60 | 90 | 70 | 7.5 | -2.64          | 90 | 90 | 70 | 7.5 | -2.28          |
| 0 | 90 | 70 | 8   | -2.66          | 30 | 90 | 70 | 8   | -2.38          | 60 | 90 | 70 | 8   | -1.82          | 90 | 90 | 70 | 8   | -1.53          |
| 0 | 90 | 70 | 8.5 | -1.90          | 30 | 90 | 70 | 8.5 | -1.69          | 60 | 90 | 70 | 8.5 | -1.28          | 90 | 90 | 70 | 8.5 | -1.07          |
| 0 | 90 | 70 | 9   | -1.39          | 30 | 90 | 70 | 9   | -1.23          | 60 | 90 | 70 | 9   | -0.91          | 90 | 90 | 70 | 9   | -0.75          |
| 0 | 90 | 70 | 9.5 | -1.02          | 30 | 90 | 70 | 9.5 | -0.90          | 60 | 90 | 70 | 9.5 | -0.66          | 90 | 90 | 70 | 9.5 | -0.55          |
| 0 | 90 | 70 | 10  | -0.77          | 30 | 90 | 70 | 10  | -0.68          | 60 | 90 | 70 | 10  | -0.49          | 90 | 90 | 70 | 10  | -0.39          |
| 0 | 90 | 70 | 12  | -0.27          | 30 | 90 | 70 | 12  | -0.23          | 60 | 90 | 70 | 12  | -0.16          | 90 | 90 | 70 | 12  | -0.13          |
| 0 | 90 | 70 | 15  | -0.07          | 30 | 90 | 70 | 15  | -0.06          | 60 | 90 | 70 | 15  | -0.04          | 90 | 90 | 70 | 15  | -0.03          |
| 0 | 90 | 70 | 20  | 0.00           | 30 | 90 | 70 | 20  | 0.00           | 60 | 90 | 70 | 20  | 0.00           | 90 | 90 | 70 | 20  | 0.00           |
| 0 | 90 | 80 | 2.5 | 985.12         | 30 | 90 | 80 | 2.5 | 1007.20        | 60 | 90 | 80 | 2.5 | 1050.37        | 90 | 90 | 80 | 2.5 | 1071.54        |
| 0 | 90 | 80 | 2.6 | 219.79         | 30 | 90 | 80 | 2.6 | 240.58         | 60 | 90 | 80 | 2.6 | 281.24         | 90 | 90 | 80 | 2.6 | 301.22         |
| 0 | 90 | 80 | 2.7 | 44.20          | 30 | 90 | 80 | 2.7 | 63.51          | 60 | 90 | 80 | 2.7 | 101.28         | 90 | 90 | 80 | 2.7 | 119.82         |
| 0 | 90 | 80 | 2.8 | -67.86         | 30 | 90 | 80 | 2.8 | -50.06         | 60 | 90 | 80 | 2.8 | -15.30         | 90 | 90 | 80 | 2.8 | 1.74           |
| 0 | 90 | 80 | 2.9 | -135.55        | 30 | 90 | 80 | 2.9 | -119.26        | 60 | 90 | 80 | 2.9 | -87.50         | 90 | 90 | 80 | 2.9 | -71.95         |
| 0 | 90 | 80 | 3   | -172.76        | 30 | 90 | 80 | 3   | -157.96        | 60 | 90 | 80 | 3   | -129.12        | 90 | 90 | 80 | 3   | -115.00        |
| 0 | 90 | 80 | 3.1 | -189.47        | 30 | 90 | 80 | 3.1 | -176.11        | 60 | 90 | 80 | 3.1 | -150.05        | 90 | 90 | 80 | 3.1 | -137.29        |
| 0 | 90 | 80 | 3.2 | <b>-192.75</b> | 30 | 90 | 80 | 3.2 | <b>-180.75</b> | 60 | 90 | 80 | 3.2 | <b>-157.30</b> | 90 | 90 | 80 | 3.2 | <b>-145.80</b> |
| 0 | 90 | 80 | 3.3 | -187.59        | 30 | 90 | 80 | 3.3 | -176.85        | 60 | 90 | 80 | 3.3 | -155.77        | 90 | 90 | 80 | 3.3 | -145.41        |
| 0 | 90 | 80 | 3.4 | -177.46        | 30 | 90 | 80 | 3.4 | -167.84        | 60 | 90 | 80 | 3.4 | -148.88        | 90 | 90 | 80 | 3.4 | -139.54        |
| 0 | 90 | 80 | 3.5 | -164.70        | 30 | 90 | 80 | 3.5 | -156.06        | 60 | 90 | 80 | 3.5 | -138.97        | 90 | 90 | 80 | 3.5 | -130.54        |
| 0 | 90 | 80 | 3.6 | -150.82        | 30 | 90 | 80 | 3.6 | -143.05        | 60 | 90 | 80 | 3.6 | -127.62        | 90 | 90 | 80 | 3.6 | -120.00        |
| 0 | 90 | 80 | 3.7 | -136.83        | 30 | 90 | 80 | 3.7 | -129.81        | 60 | 90 | 80 | 3.7 | -115.86        | 90 | 90 | 80 | 3.7 | -108.95        |
| 0 | 90 | 80 | 3.8 | -123.31        | 30 | 90 | 80 | 3.8 | -116.96        | 60 | 90 | 80 | 3.8 | -104.32        | 90 | 90 | 80 | 3.8 | -98.06         |
| 0 | 90 | 80 | 3.9 | -110.62        | 30 | 90 | 80 | 3.9 | -104.86        | 60 | 90 | 80 | 3.9 | -93.40         | 90 | 90 | 80 | 3.9 | -87.70         |
| 0 | 90 | 80 | 4   | -98.93         | 30 | 90 | 80 | 4   | -93.69         | 60 | 90 | 80 | 4   | -83.28         | 9  |    |    |     |                |

|   |    |    |     |                |    |    |    |     |                |    |    |    |     |                |    |    |    |     |                |
|---|----|----|-----|----------------|----|----|----|-----|----------------|----|----|----|-----|----------------|----|----|----|-----|----------------|
| 0 | 90 | 80 | 5.8 | -14.71         | 30 | 90 | 80 | 5.8 | -13.57         | 60 | 90 | 80 | 5.8 | -11.29         | 90 | 90 | 80 | 5.8 | -10.16         |
| 0 | 90 | 80 | 5.9 | -13.43         | 30 | 90 | 80 | 5.9 | -12.37         | 60 | 90 | 80 | 5.9 | -10.26         | 90 | 90 | 80 | 5.9 | -9.21          |
| 0 | 90 | 80 | 6   | -12.29         | 30 | 90 | 80 | 6   | -11.30         | 60 | 90 | 80 | 6   | -9.34          | 90 | 90 | 80 | 6   | -8.37          |
| 0 | 90 | 80 | 6.5 | -8.05          | 30 | 90 | 80 | 6.5 | -7.35          | 60 | 90 | 80 | 6.5 | -5.98          | 90 | 90 | 80 | 6.5 | -5.29          |
| 0 | 90 | 80 | 7   | -5.44          | 30 | 90 | 80 | 7   | -4.94          | 60 | 90 | 80 | 7   | -3.96          | 90 | 90 | 80 | 7   | -3.47          |
| 0 | 90 | 80 | 7.5 | -3.78          | 30 | 90 | 80 | 7.5 | -3.42          | 60 | 90 | 80 | 7.5 | -2.70          | 90 | 90 | 80 | 7.5 | -2.33          |
| 0 | 90 | 80 | 8   | -2.69          | 30 | 90 | 80 | 8   | -2.42          | 60 | 90 | 80 | 8   | -1.89          | 90 | 90 | 80 | 8   | -1.63          |
| 0 | 90 | 80 | 8.5 | -1.95          | 30 | 90 | 80 | 8.5 | -1.74          | 60 | 90 | 80 | 8.5 | -1.35          | 90 | 90 | 80 | 8.5 | -1.18          |
| 0 | 90 | 80 | 9   | -1.44          | 30 | 90 | 80 | 9   | -1.28          | 60 | 90 | 80 | 9   | -0.98          | 90 | 90 | 80 | 9   | -0.69          |
| 0 | 90 | 80 | 9.5 | -1.08          | 30 | 90 | 80 | 9.5 | -0.96          | 60 | 90 | 80 | 9.5 | -0.72          | 90 | 90 | 80 | 9.5 | -0.61          |
| 0 | 90 | 80 | 10  | -0.82          | 30 | 90 | 80 | 10  | -0.72          | 60 | 90 | 80 | 10  | -0.54          | 90 | 90 | 80 | 10  | -0.44          |
| 0 | 90 | 80 | 12  | -0.30          | 30 | 90 | 80 | 12  | -0.26          | 60 | 90 | 80 | 12  | -0.19          | 90 | 90 | 80 | 12  | -0.15          |
| 0 | 90 | 80 | 15  | -0.08          | 30 | 90 | 80 | 15  | -0.06          | 60 | 90 | 80 | 15  | -0.05          | 90 | 90 | 80 | 15  | -0.04          |
| 0 | 90 | 80 | 20  | 0.00           | 30 | 90 | 80 | 20  | 0.00           | 60 | 90 | 80 | 20  | 0.00           | 90 | 90 | 80 | 20  | 0.00           |
| 0 | 90 | 90 | 2.5 | 941.40         | 30 | 90 | 90 | 2.5 | 968.86         | 60 | 90 | 90 | 2.5 | 923.00         | 90 | 90 | 90 | 2.5 | 949.76         |
| 0 | 90 | 90 | 2.6 | 339.91         | 30 | 90 | 90 | 2.6 | 364.26         | 60 | 90 | 90 | 2.6 | 312.28         | 90 | 90 | 90 | 2.6 | 335.92         |
| 0 | 90 | 90 | 2.7 | -86.99         | 30 | 90 | 90 | 2.7 | -65.42         | 60 | 90 | 90 | 2.7 | -22.96         | 90 | 90 | 90 | 2.7 | -2.17          |
| 0 | 90 | 90 | 2.8 | -162.38        | 30 | 90 | 90 | 2.8 | -143.29        | 60 | 90 | 90 | 2.8 | -105.69        | 90 | 90 | 90 | 2.8 | -87.35         |
| 0 | 90 | 90 | 2.9 | -202.73        | 30 | 90 | 90 | 2.9 | -185.81        | 60 | 90 | 90 | 2.9 | -152.44        | 90 | 90 | 90 | 2.9 | -136.18        |
| 0 | 90 | 90 | 3   | -219.65        | 30 | 90 | 90 | 3   | -204.66        | 60 | 90 | 90 | 3   | -175.03        | 90 | 90 | 90 | 3   | -160.56        |
| 0 | 90 | 90 | 3.1 | <b>-221.38</b> | 30 | 90 | 90 | 3.1 | <b>-208.10</b> | 60 | 90 | 90 | 3.1 | <b>-181.84</b> | 90 | 90 | 90 | 3.1 | <b>-168.96</b> |
| 0 | 90 | 90 | 3.2 | -213.67        | 30 | 90 | 90 | 3.2 | -201.95        | 60 | 90 | 90 | 3.2 | -178.71        | 90 | 90 | 90 | 3.2 | -167.25        |
| 0 | 90 | 90 | 3.3 | -200.61        | 30 | 90 | 90 | 3.3 | -190.25        | 60 | 90 | 90 | 3.3 | -169.67        | 90 | 90 | 90 | 3.3 | -159.49        |
| 0 | 90 | 90 | 3.4 | -184.90        | 30 | 90 | 90 | 3.4 | -175.71        | 60 | 90 | 90 | 3.4 | -157.44        | 90 | 90 | 90 | 3.4 | -148.38        |
| 0 | 90 | 90 | 3.5 | -168.28        | 30 | 90 | 90 | 3.5 | -160.09        | 60 | 90 | 90 | 3.5 | -143.81        | 90 | 90 | 90 | 3.5 | -135.72        |
| 0 | 90 | 90 | 3.6 | -151.81        | 30 | 90 | 90 | 3.6 | -144.48        | 60 | 90 | 90 | 3.6 | -129.91        | 90 | 90 | 90 | 3.6 | -122.66        |
| 0 | 90 | 90 | 3.7 | -136.12        | 30 | 90 | 90 | 3.7 | -129.53        | 60 | 90 | 90 | 3.7 | -116.43        | 90 | 90 | 90 | 3.7 | -109.92        |
| 0 | 90 | 90 | 3.8 | -121.54        | 30 | 90 | 90 | 3.8 | -115.60        | 60 | 90 | 90 | 3.8 | -103.79        | 90 | 90 | 90 | 3.8 | -97.92         |
| 0 | 90 | 90 | 3.9 | -108.24        | 30 | 90 | 90 | 3.9 | -102.87        | 60 | 90 | 90 | 3.9 | -92.19         | 90 | 90 | 90 | 3.9 | -86.87         |
| 0 | 90 | 90 | 4   | -96.25         | 30 | 90 | 90 | 4   | -91.38         | 60 | 90 | 90 | 4   | -81.70         | 90 | 90 | 90 | 4   | -76.88         |
| 0 | 90 | 90 | 4.1 | -85.54         | 30 | 90 | 90 | 4.1 | -81.12         | 60 | 90 | 90 | 4.1 | -72.31         | 90 | 90 | 90 | 4.1 | -67.93         |
| 0 | 90 | 90 | 4.2 | -76.03         | 30 | 90 | 90 | 4.2 | -72.01         | 60 | 90 | 90 | 4.2 | -63.99         | 90 | 90 | 90 | 4.2 | -60.00         |
| 0 | 90 | 90 | 4.3 | -67.63         | 30 | 90 | 90 | 4.3 | -63.95         | 60 | 90 | 90 | 4.3 | -56.65         | 90 | 90 | 90 | 4.3 | -53.01         |
| 0 | 90 | 90 | 4.4 | -60.22         | 30 | 90 | 90 | 4.4 | -56.86         | 60 | 90 | 90 | 4.4 | -50.19         | 90 | 90 | 90 | 4.4 | -46.86         |
| 0 | 90 | 90 | 4.5 | -53.69         | 30 | 90 | 90 | 4.5 | -50.62         | 60 | 90 | 90 | 4.5 | -44.52         | 90 | 90 | 90 | 4.5 | -41.47         |
| 0 | 90 | 90 | 4.6 | -47.95         | 30 | 90 | 90 | 4.6 | -45.14         | 60 | 90 | 90 | 4.6 | -39.55         | 90 | 90 | 90 | 4.6 | -36.76         |
| 0 | 90 | 90 | 4.7 | -42.90         | 30 | 90 | 90 | 4.7 | -40.33         | 60 | 90 | 90 | 4.7 | -35.19         | 90 | 90 | 90 | 4.7 | -32.63         |
| 0 | 90 | 90 | 4.8 | -38.46         | 30 | 90 | 90 | 4.8 | -36.09         | 60 | 90 | 90 | 4.8 | -31.37         | 90 | 90 | 90 | 4.8 | -29.02         |
| 0 | 90 | 90 | 4.9 | -34.54         | 30 | 90 | 90 | 4.9 | -32.37         | 60 | 90 | 90 | 4.9 | -28.02         | 90 | 90 | 90 | 4.9 | -25.86         |
| 0 | 90 | 90 | 5   | -31.09         | 30 | 90 | 90 | 5   | -29.08         | 60 | 90 | 90 | 5   | -25.08         | 90 | 90 | 90 | 5   | -23.08         |
| 0 | 90 | 90 | 5.1 | -28.03         | 30 | 90 | 90 | 5.1 | -26.18         | 60 | 90 | 90 | 5.1 | -22.49         | 90 | 90 | 90 | 5.1 | -20.65         |
| 0 | 90 | 90 | 5.2 | -25.33         | 30 | 90 | 90 | 5.2 | -23.62         | 60 | 90 | 90 | 5.2 | -20.21         | 90 | 90 | 90 | 5.2 | -18.51         |
| 0 | 90 | 90 | 5.3 | -22.93         | 30 | 90 | 90 | 5.3 | -21.35         | 60 | 90 | 90 | 5.3 | -18.20         | 90 | 90 | 90 | 5.3 | -16.63         |
| 0 | 90 | 90 | 5.4 | -20.80         | 30 | 90 | 90 | 5.4 | -19.34         | 60 | 90 | 90 | 5.4 | -16.42         | 90 | 90 | 90 | 5.4 | -14.96         |
| 0 | 90 | 90 | 5.5 | -18.90         | 30 | 90 | 90 | 5.5 | -17.54         | 60 | 90 | 90 | 5.5 | -14.84         | 90 | 90 | 90 | 5.5 | -13.49         |
| 0 | 90 | 90 | 5.6 | -17.20         | 30 | 90 | 90 | 5.6 | -15.95         | 60 | 90 | 90 | 5.6 | -13.44         | 90 | 90 | 90 | 5.6 | -12.19         |
| 0 | 90 | 90 | 5.7 | -15.69         | 30 | 90 | 90 | 5.7 | -14.52         | 60 | 90 | 90 | 5.7 | -12.19         | 90 | 90 | 90 | 5.7 | -11.03         |
| 0 | 90 | 90 | 5.8 | -14.33         | 30 | 90 | 90 | 5.8 | -13.25         | 60 | 90 | 90 | 5.8 | -11.08         | 90 | 90 | 90 | 5.8 | -10.00         |
| 0 | 90 | 90 | 5.9 | -13.11         | 30 | 90 | 90 | 5.9 | -12.10         | 60 | 90 | 90 | 5.9 | -10.09         | 90 | 90 | 90 | 5.9 | -9.08          |
| 0 | 90 | 90 | 6   | -12.01         | 30 | 90 | 90 | 6   | -11.07         | 60 | 90 | 90 | 6   | -9.20          | 90 | 90 | 90 | 6   | -8.27          |
| 0 | 90 | 90 | 6.5 | -7.92          | 30 | 90 | 90 | 6.5 | -7.26          | 60 | 90 | 90 | 6.5 | -5.94          | 90 | 90 | 90 | 6.5 | -5.27          |
| 0 | 90 | 90 | 7   | -5.38          | 30 | 90 | 90 | 7   | -4.91          | 60 | 90 | 90 | 7   | -3.96          | 90 | 90 | 90 | 7   | -3.48          |
| 0 | 90 | 90 | 7.5 | -3.77          | 30 | 90 | 90 | 7.5 | -3.42          | 60 | 90 | 90 | 7.5 | -2.73          | 90 | 90 | 90 | 7.5 | -2.36          |
| 0 | 90 | 90 | 8   | -2.71          | 30 | 90 | 90 | 8   | -2.45          | 60 | 90 | 90 | 8   | -1.93          | 90 | 90 | 90 | 8   | -1.65          |
| 0 | 90 | 90 | 8.5 | -1.95          | 30 | 90 | 90 | 8.5 | -1.76          | 60 | 90 | 90 | 8.5 | -1.38          | 90 | 90 | 90 | 8.5 | -1.21          |
| 0 | 90 | 90 | 9   | -1.41          | 30 | 90 | 90 | 9   | -1.27          | 60 | 90 | 90 | 9   | -1.04          | 90 | 90 | 90 | 9   | -0.89          |
| 0 | 90 | 90 | 9.5 | -1.09          | 30 | 90 | 90 | 9.5 | -0.98          | 60 | 90 | 90 | 9.5 | -0.74          | 90 | 90 | 90 | 9.5 | -0.63          |
| 0 | 90 | 90 | 10  | -0.83          | 30 | 90 | 90 | 10  | -0.74          | 60 | 90 | 90 | 10  | -0.50          | 90 | 90 | 90 | 10  | -0.54          |
| 0 | 90 | 90 | 12  | -0.31          | 30 | 90 | 90 | 12  | -0.27          | 60 | 90 | 90 | 12  | -0.20          | 90 | 90 | 90 | 12  | -0.16          |
| 0 | 90 | 90 | 15  | -0.08          | 30 | 90 | 90 | 15  | -0.07          | 60 | 90 | 90 | 15  | -0.05          | 90 | 90 | 90 | 15  | -0.04          |
| 0 | 90 | 90 | 20  | 0.00           | 30 | 90 | 90 | 20  | 0.00           | 60 | 90 | 90 | 20  | 0.00           | 90 | 90 | 90 | 20  | 0.00           |
